# Supplementary material for: Synthesis, Spectroscopic Properties, and Metalation of 3-Alkoxybenziporphyrins
Source: MDPI journal article supplement (doi:10.3390/molecules29081903), 2024-04-22
Supplement: s1 [file s1]

## **Supporting information for**

## **Synthesis, Metalation and Spectroscopic Characterization of 3-**

## **Alkoxybenziporphyrins**

Rachel A. Tomlovich and Timothy D. Lash, Department of Chemistry, Illinois State University,  
Normal, Illinois 61790-4160

### Table of Contents

#### Page

|          |                                                                                                                |
|----------|----------------------------------------------------------------------------------------------------------------|
| S2-S11   | Selected UV-Vis spectra (Figures S1-S20)                                                                       |
| S12-S95  | Selected proton, DEPT-135, $^1\text{H}$ - $^1\text{H}$ COSY, HSQC and carbon-13 NMR spectra (Figures S21-S133) |
| S96-S107 | Selected mass spectra (Figures S134-S149)                                                                      |

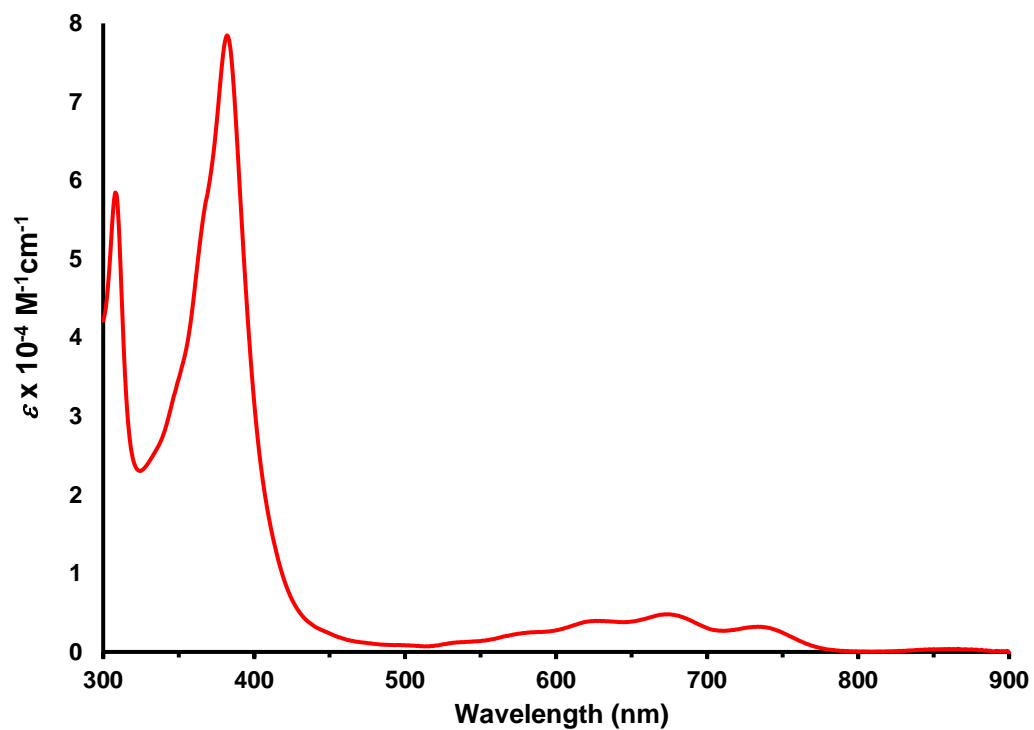

Figure S1. UV-vis spectrum of 3-ethoxybenzporphyrin **7b** in  $\text{CH}_2\text{Cl}_2$ .

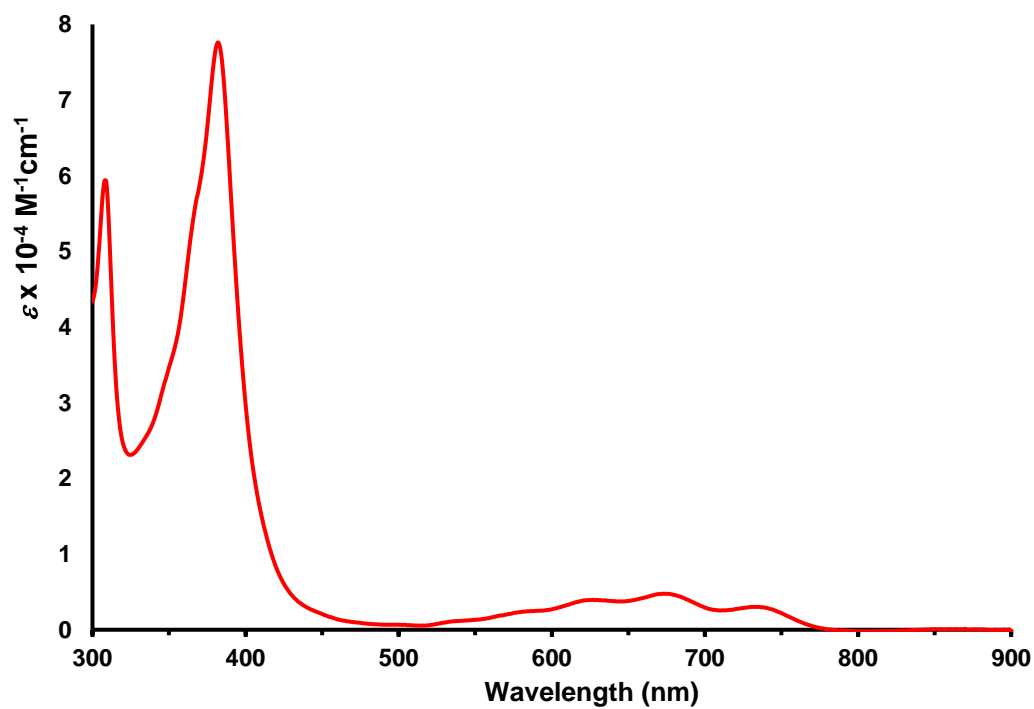

Figure S2. UV-vis spectrum of 3-ethoxybenzporphyrin **7b** in 1%  $\text{Et}_3\text{N}$ - $\text{CH}_2\text{Cl}_2$ .

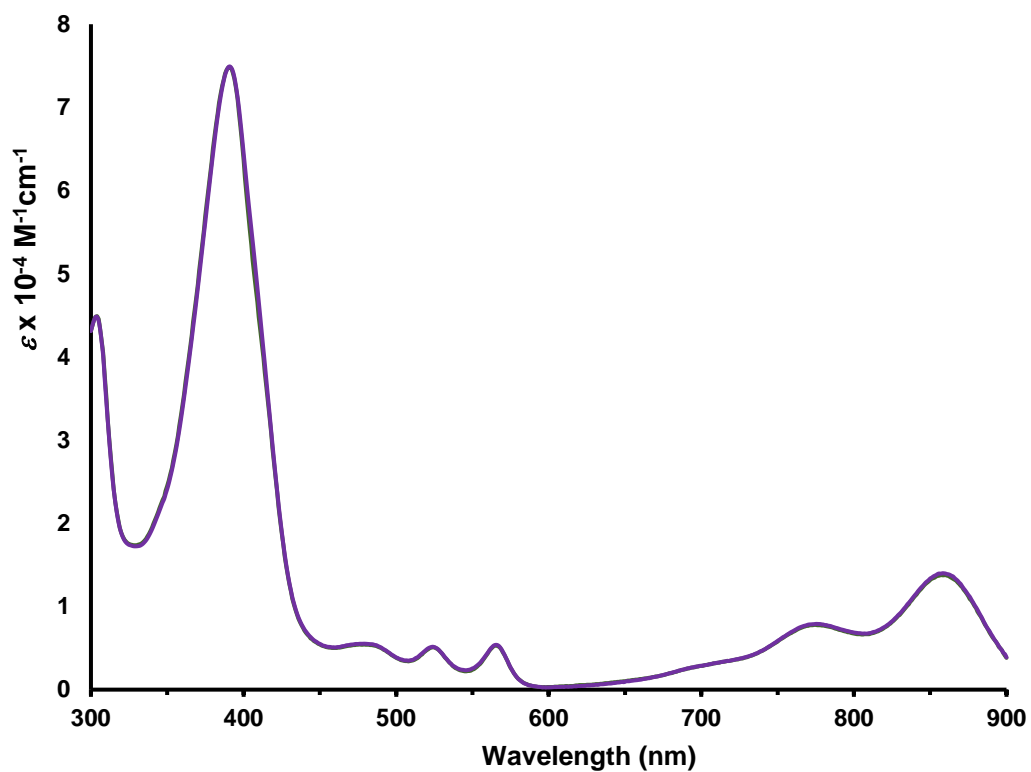

Figure S3. UV-vis spectrum of 3-ethoxybenziporphyrin **7b** in  $\text{CH}_2\text{Cl}_2$  with 5 equivalents of TFA.

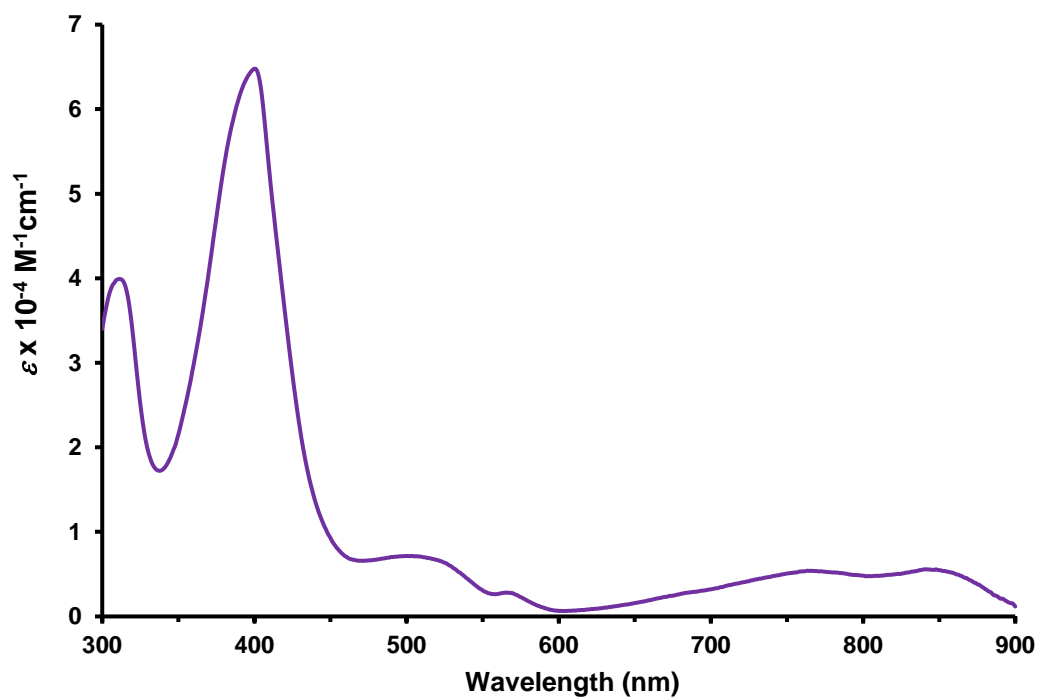

Figure S4. UV-vis spectrum of 3-ethoxybenziporphyrin **7b** in  $\text{CH}_2\text{Cl}_2$  with 500 equivalents of TFA.

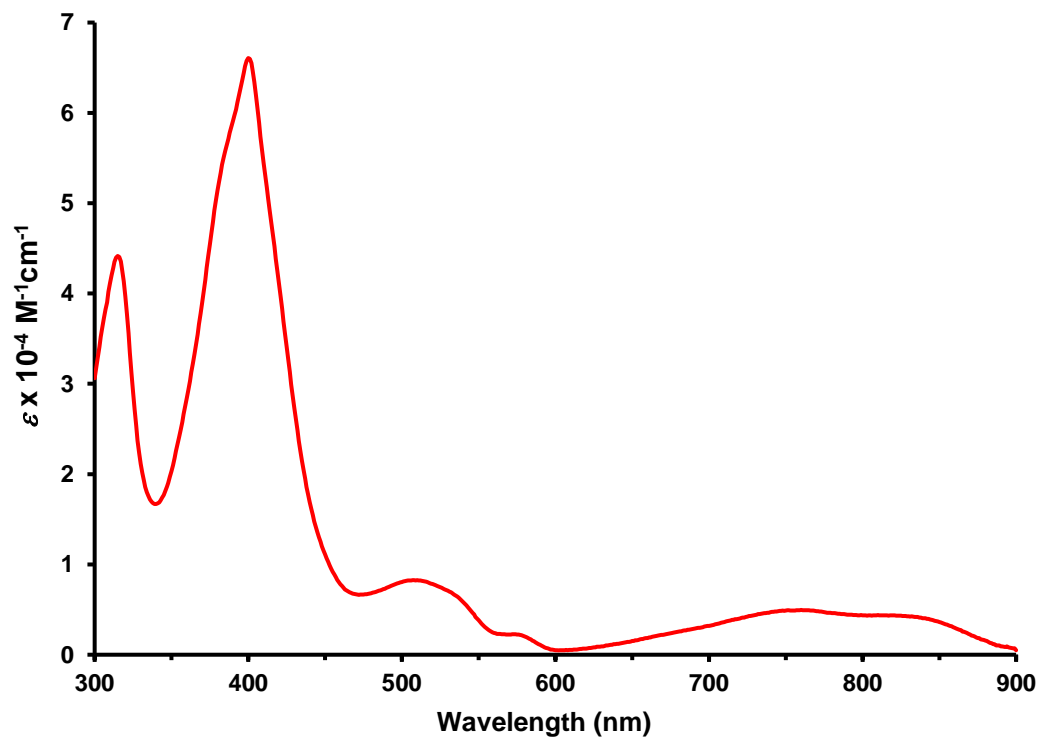

Figure S5. UV-vis spectrum of 3-ethoxybenziporphyrin **7b** in 1% TFA-CH<sub>2</sub>Cl<sub>2</sub>.

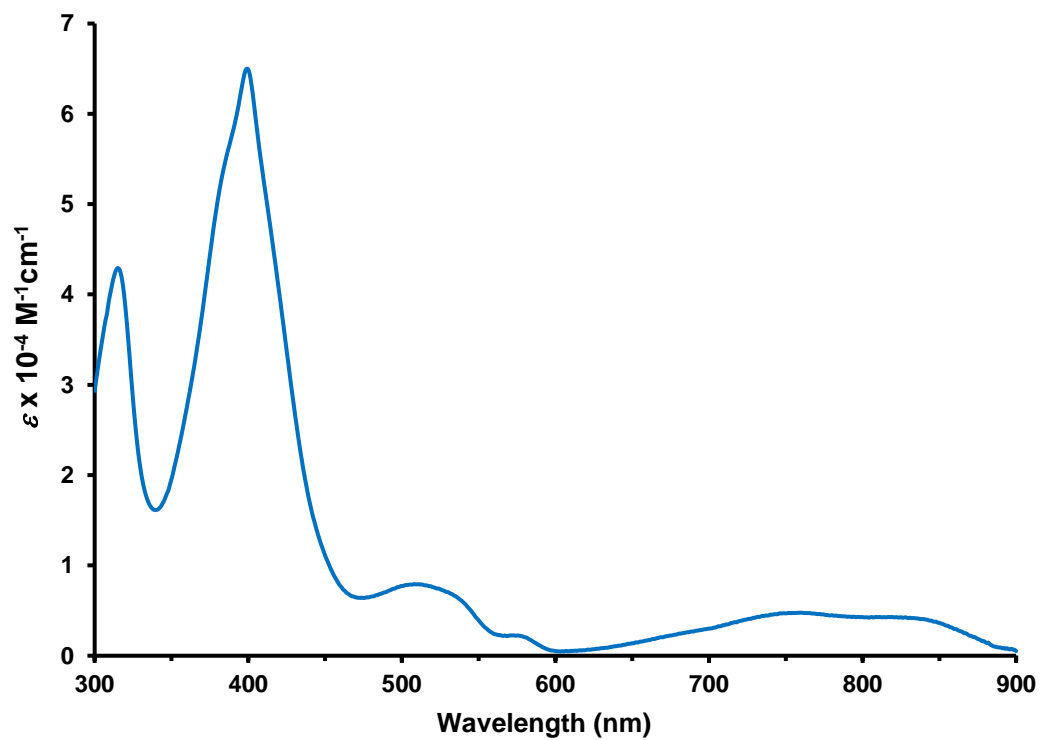

Figure S6. UV-vis spectrum of 3-ethoxybenziporphyrin **7b** in 5% TFA-CH<sub>2</sub>Cl<sub>2</sub>.



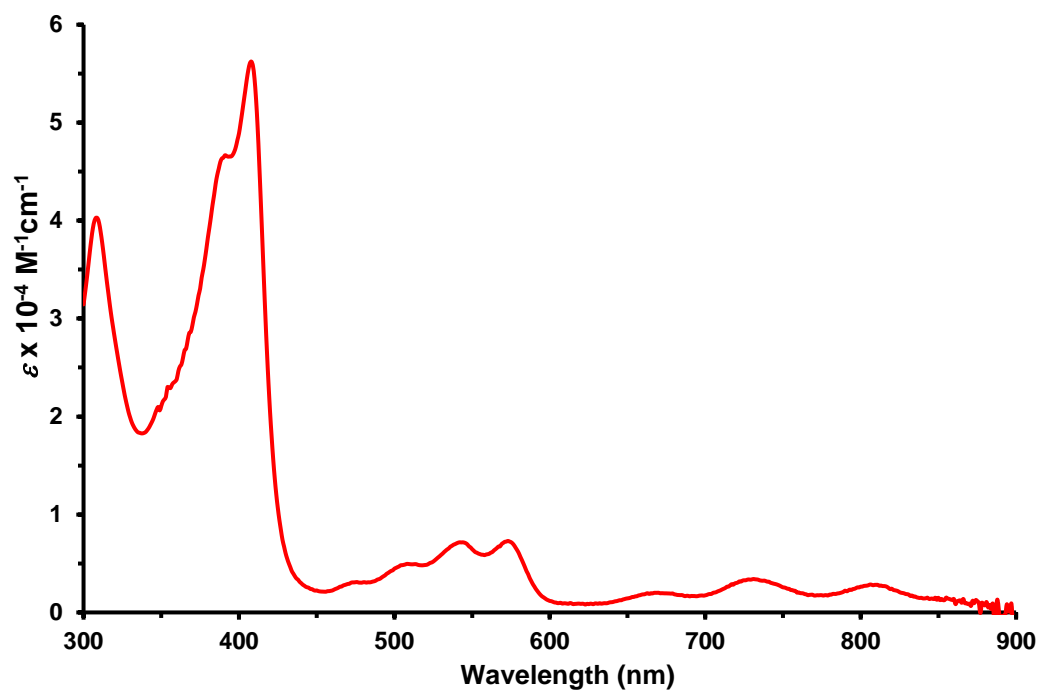

Figure S7. UV-vis spectrum of Pd(II) complex **7bPd** in CH<sub>2</sub>Cl<sub>2</sub>.

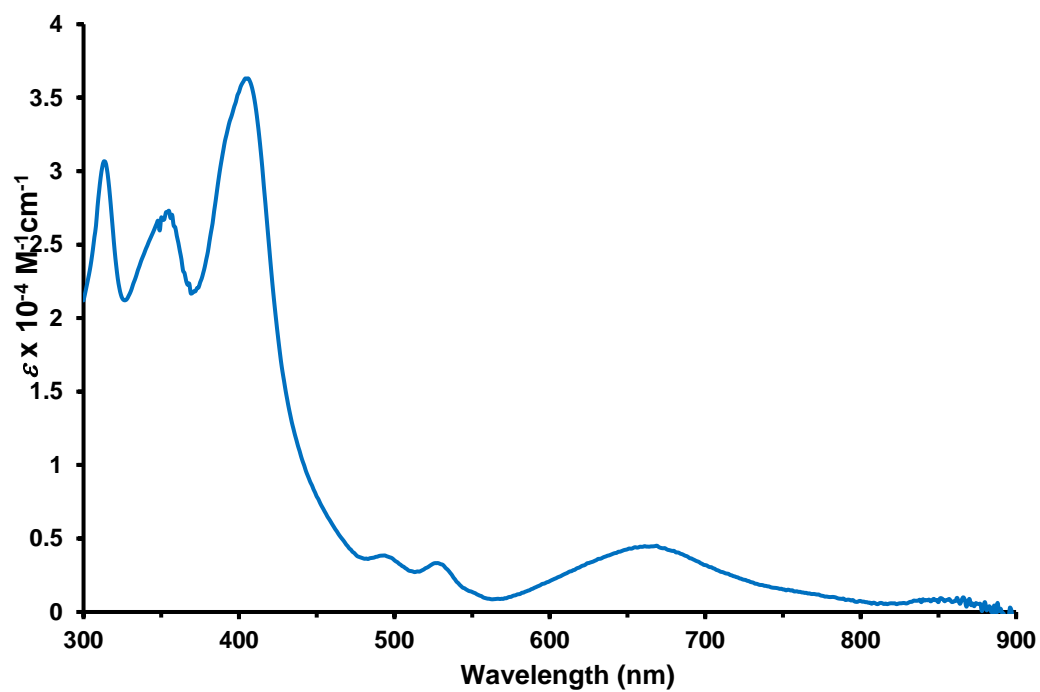

Figure S8. UV-vis spectrum of Ni(II) complex **7bNi** in CH<sub>2</sub>Cl<sub>2</sub>.

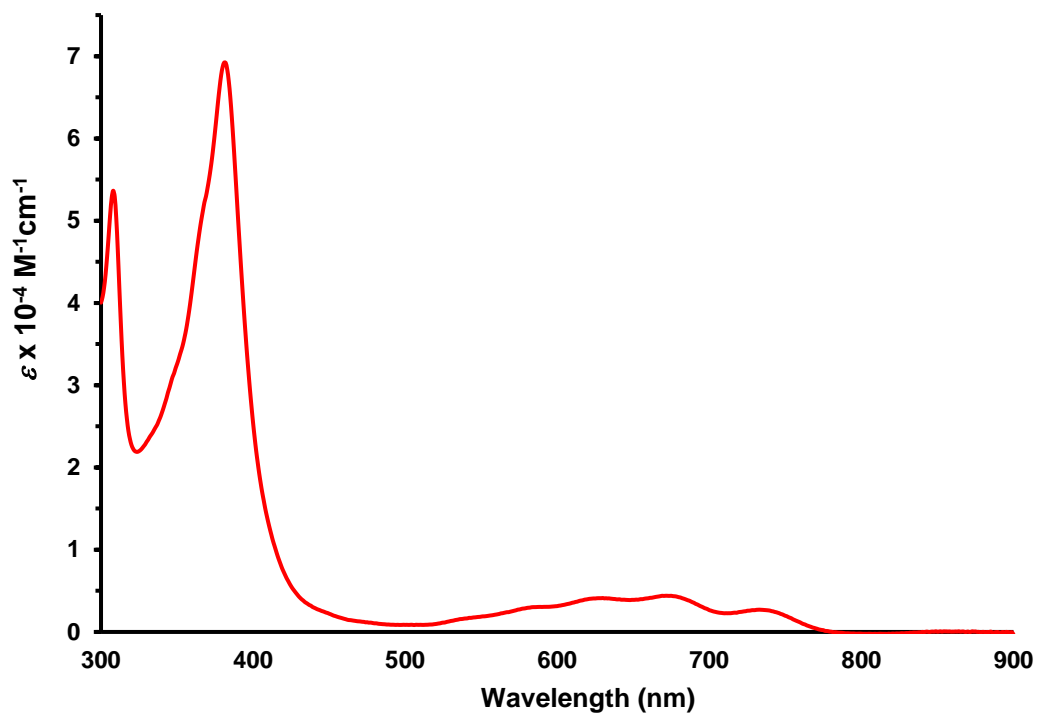

Figure S9. UV-vis spectrum of methoxybenziporphyrin **7a** in 1% Et<sub>3</sub>N-CH<sub>2</sub>Cl<sub>2</sub>.

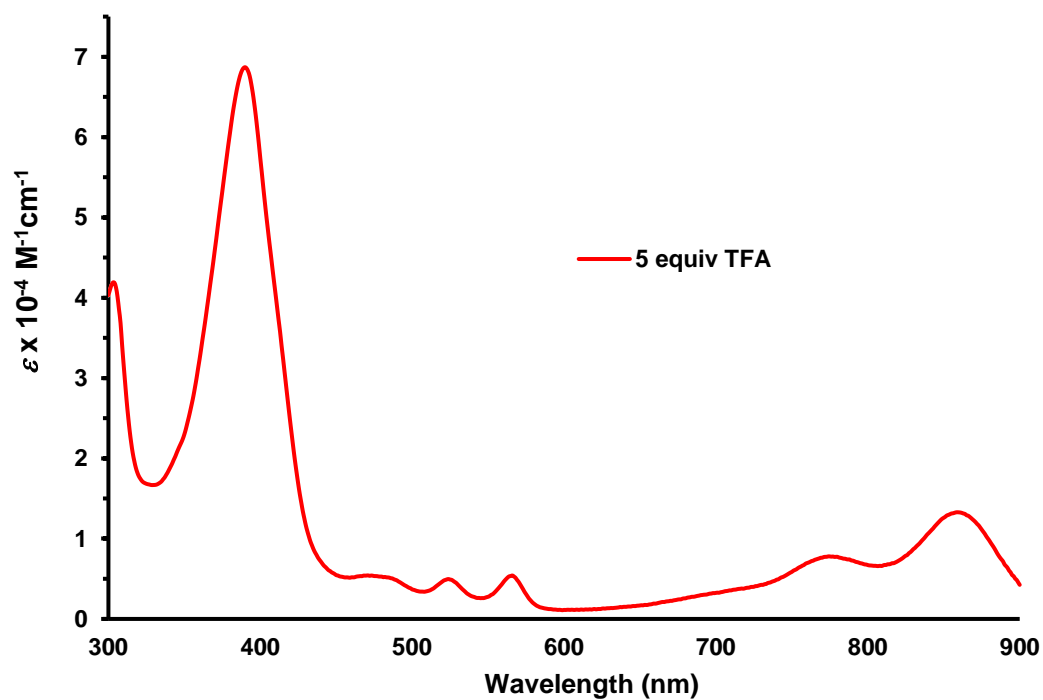

Figure S10. UV-vis spectrum of methoxybenziporphyrin **7a** in CH<sub>2</sub>Cl<sub>2</sub> with 5 equivalents of TFA.

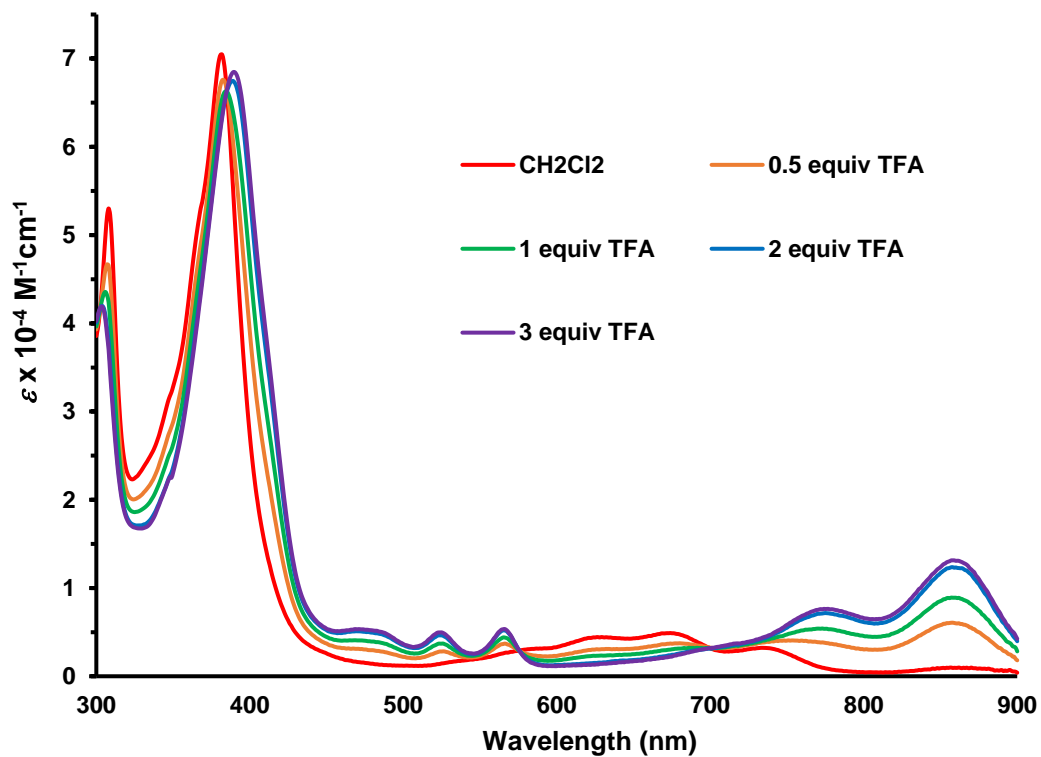

Figure S11. UV-vis spectra of methoxybenzporphyrin **7a** in  $\text{CH}_2\text{Cl}_2$  with 0-3 equivalents of TFA.

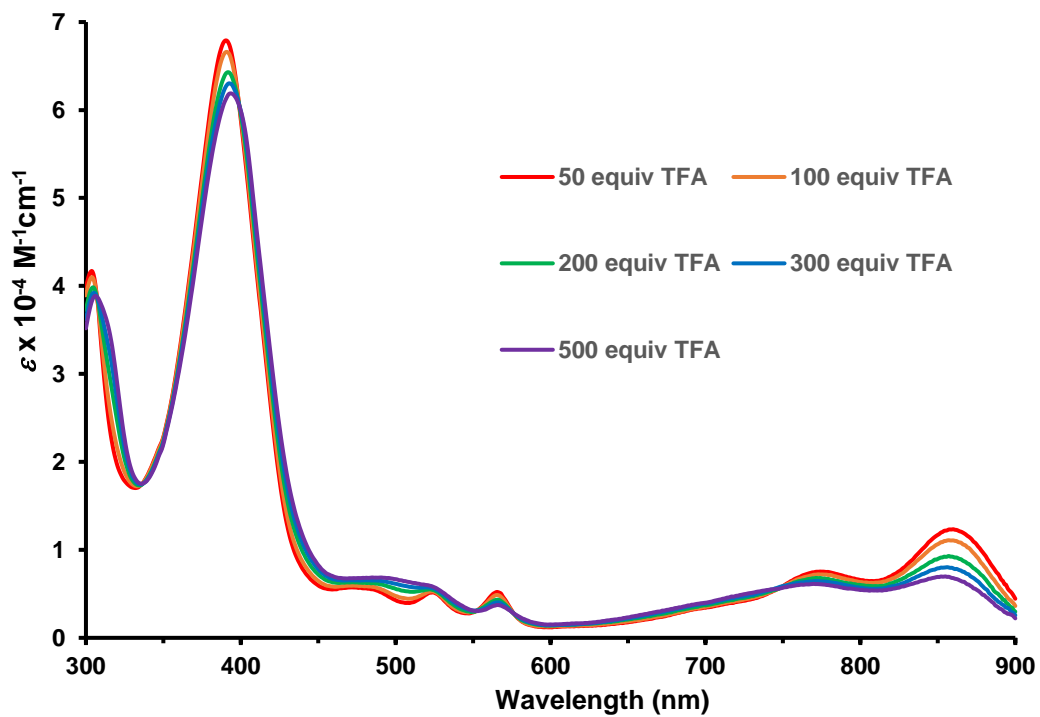

Figure S12. UV-vis spectra of methoxybenzporphyrin **7a** in  $\text{CH}_2\text{Cl}_2$  with 50-500 equivalents of TFA.

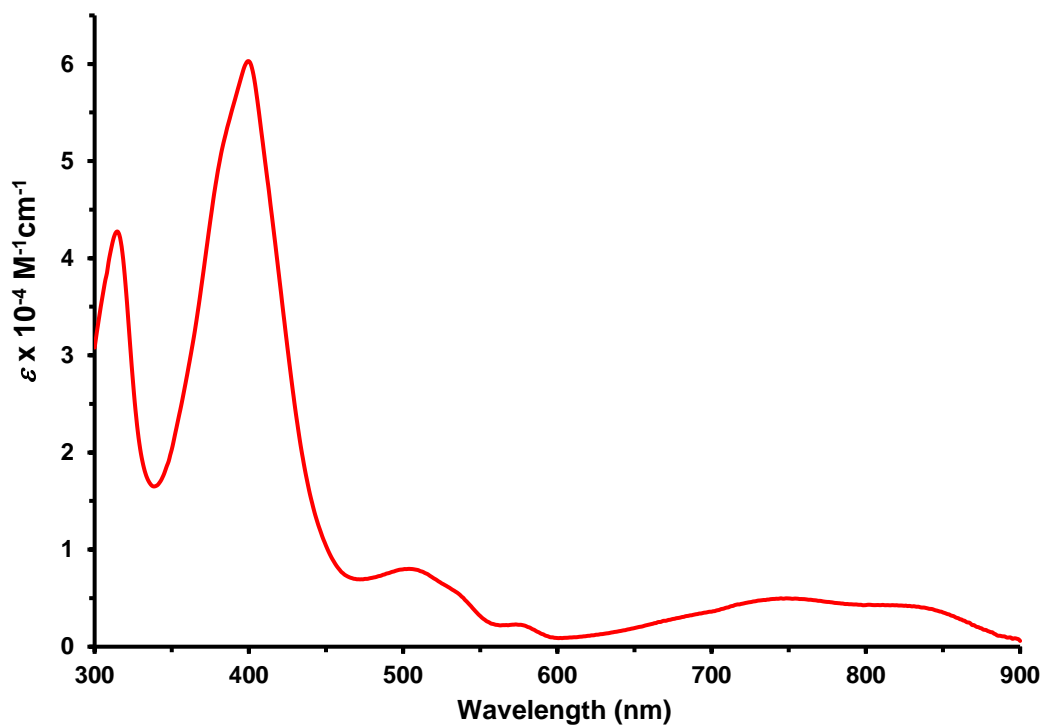

Figure S13. UV-vis spectrum of methoxybenziporphyrin **7a** in 1% TFA-CH<sub>2</sub>Cl<sub>2</sub>.

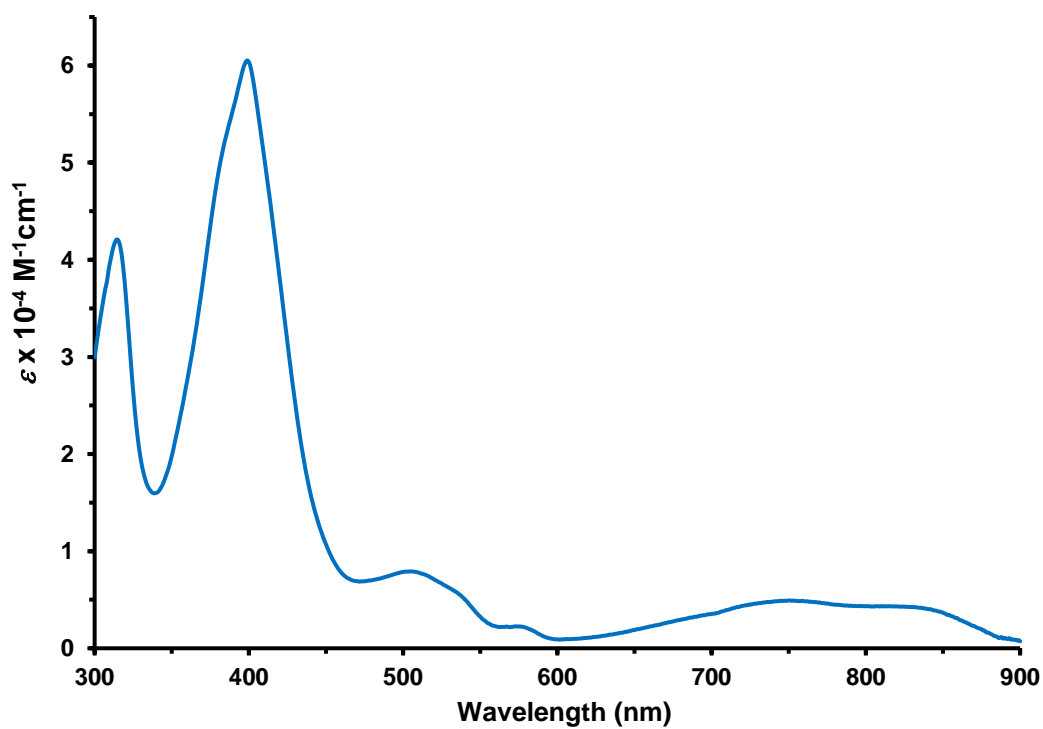

Figure S14. UV-vis spectrum of methoxybenziporphyrin **7a** in 5% TFA-CH<sub>2</sub>Cl<sub>2</sub>.

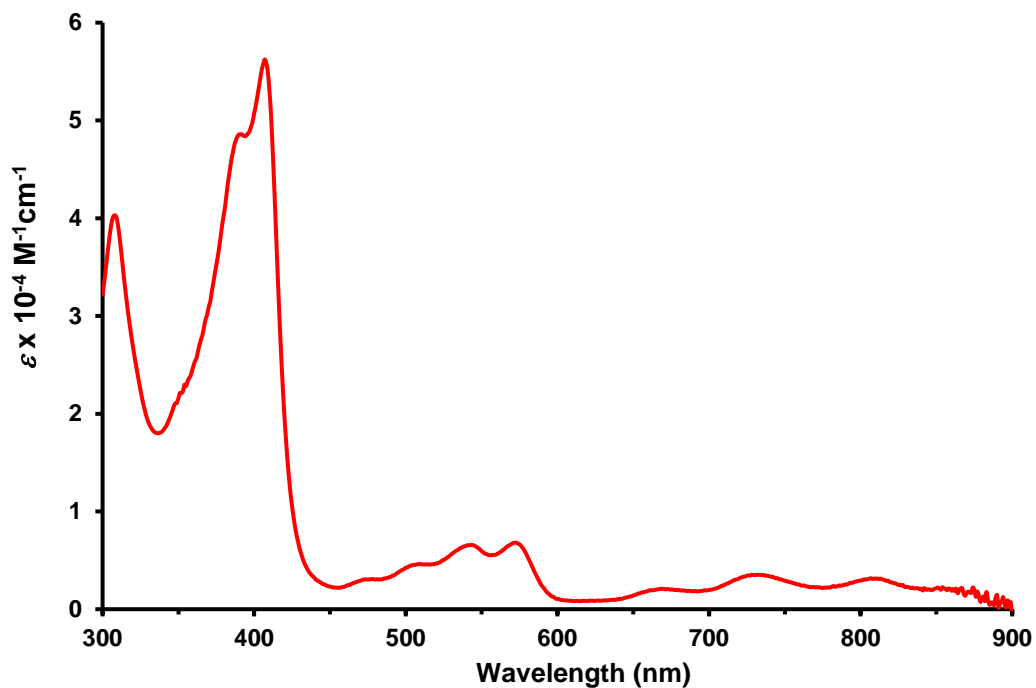

Figure S15. UV-vis spectrum of palladium(II) complex **7aPd** in  $\text{CH}_2\text{Cl}_2$ .

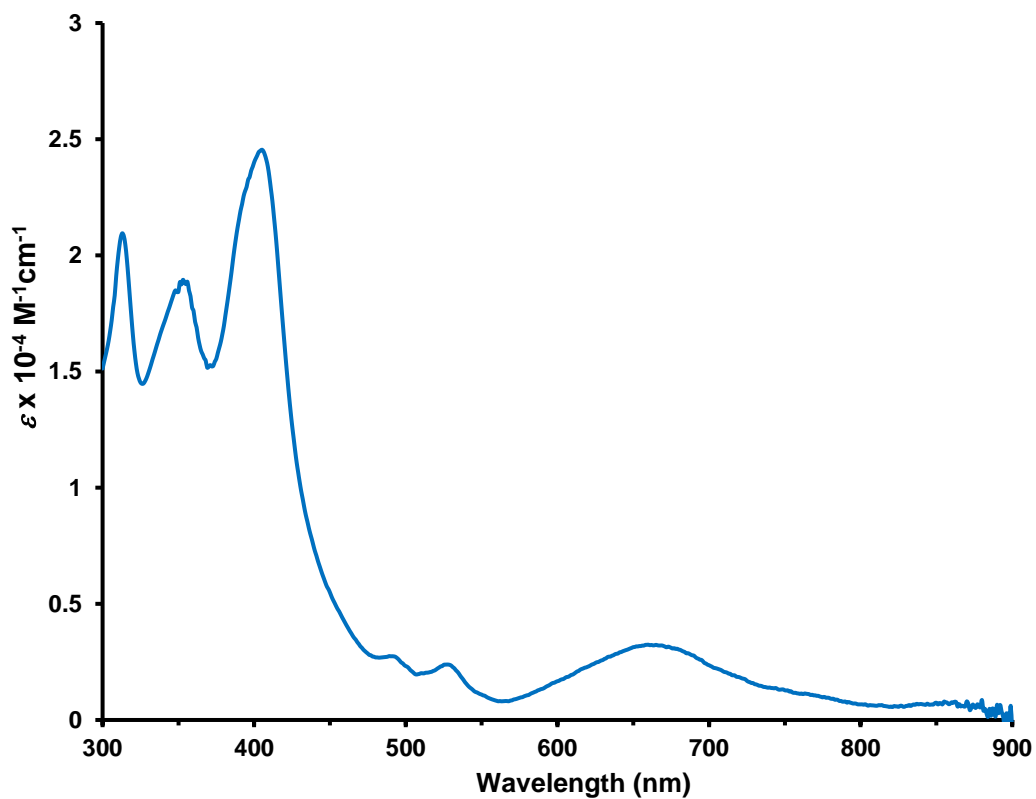

Figure S16. UV-vis spectrum of nickel(II) complex **7aNi** in  $\text{CH}_2\text{Cl}_2$ .

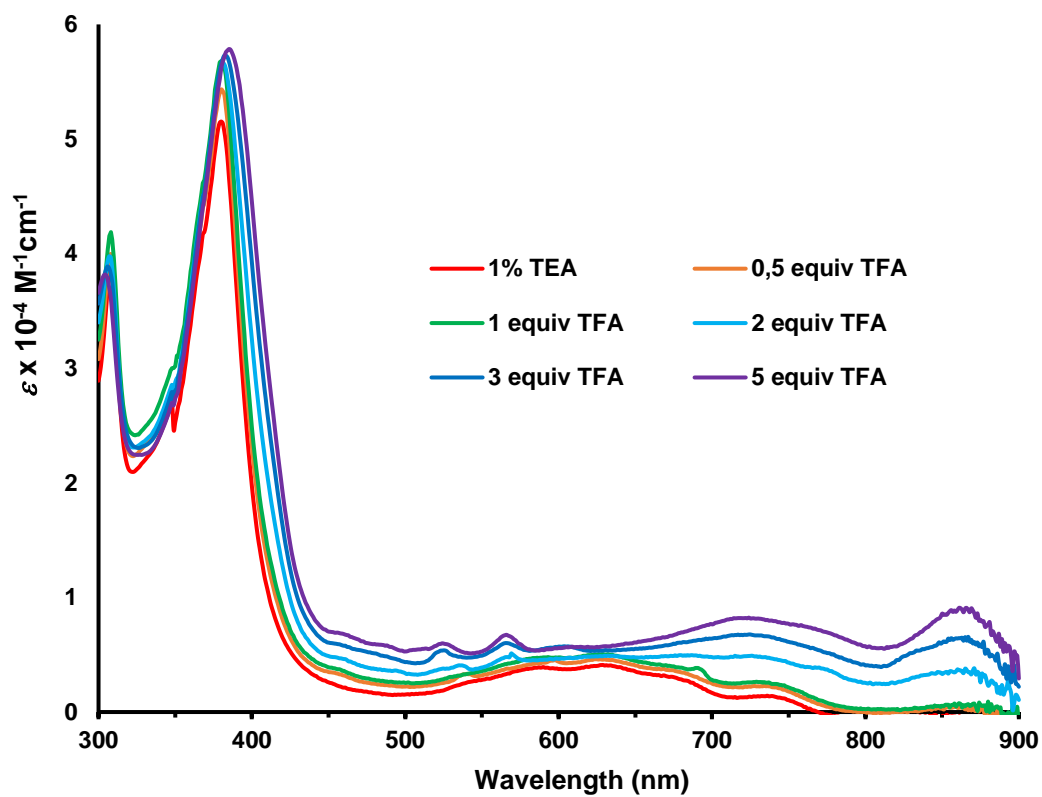

Figure S17. UV-vis spectra of methoxycarbonylmethoxybenziporphyrin **7c** in 1% Et<sub>3</sub>N-CH<sub>2</sub>Cl<sub>2</sub> and with 0.5-5 equivalents of TFA in CH<sub>2</sub>Cl<sub>2</sub>.

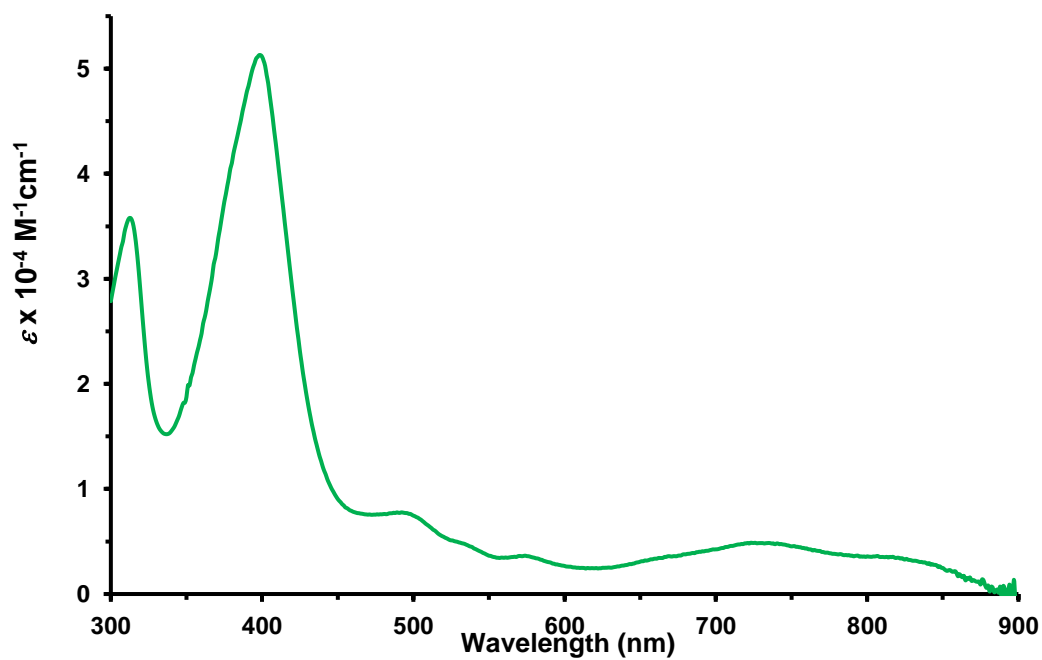

Figure S18. UV-vis spectrum of **7c** in 1% TFA-CH<sub>2</sub>Cl<sub>2</sub>.

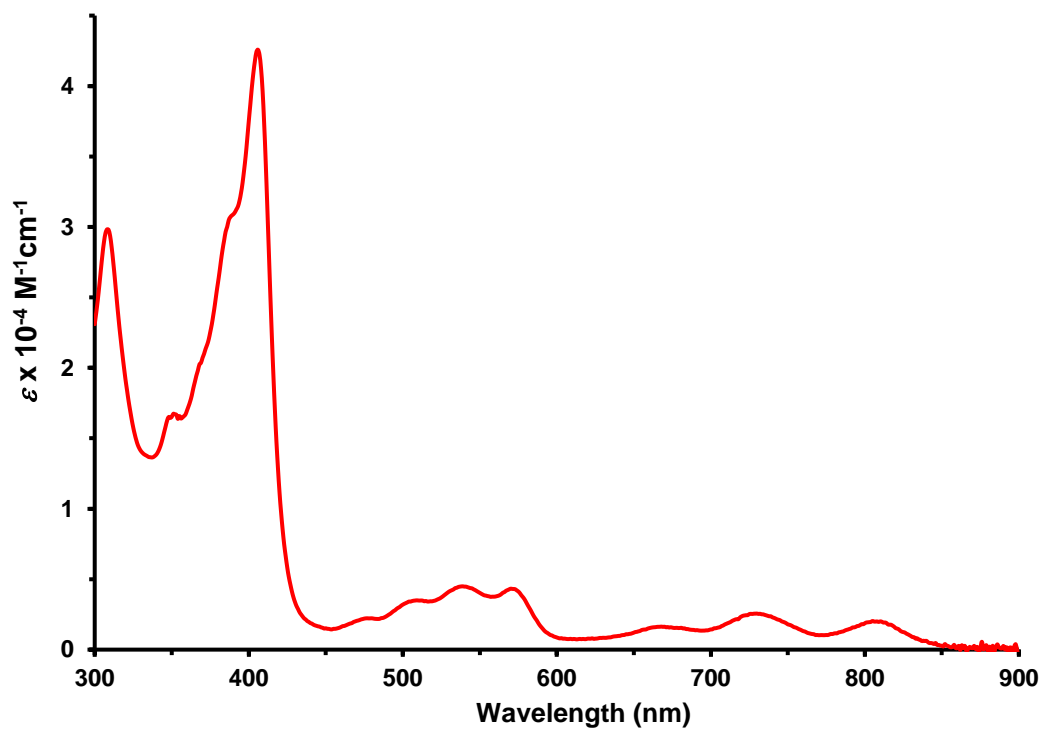

Figure S19. UV-vis spectrum of palladium(II) complex **7cPd** in  $\text{CH}_2\text{Cl}_2$ .

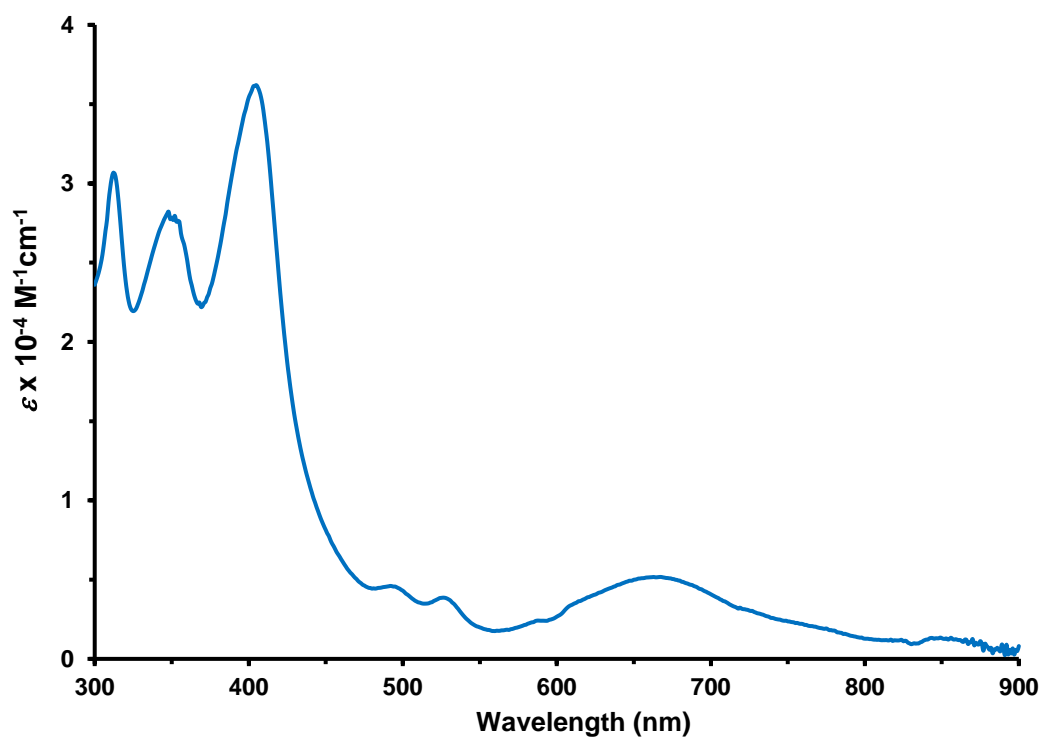

Figure S20. UV-vis spectrum of nickel(II) complex **7cNi** in  $\text{CH}_2\text{Cl}_2$ .

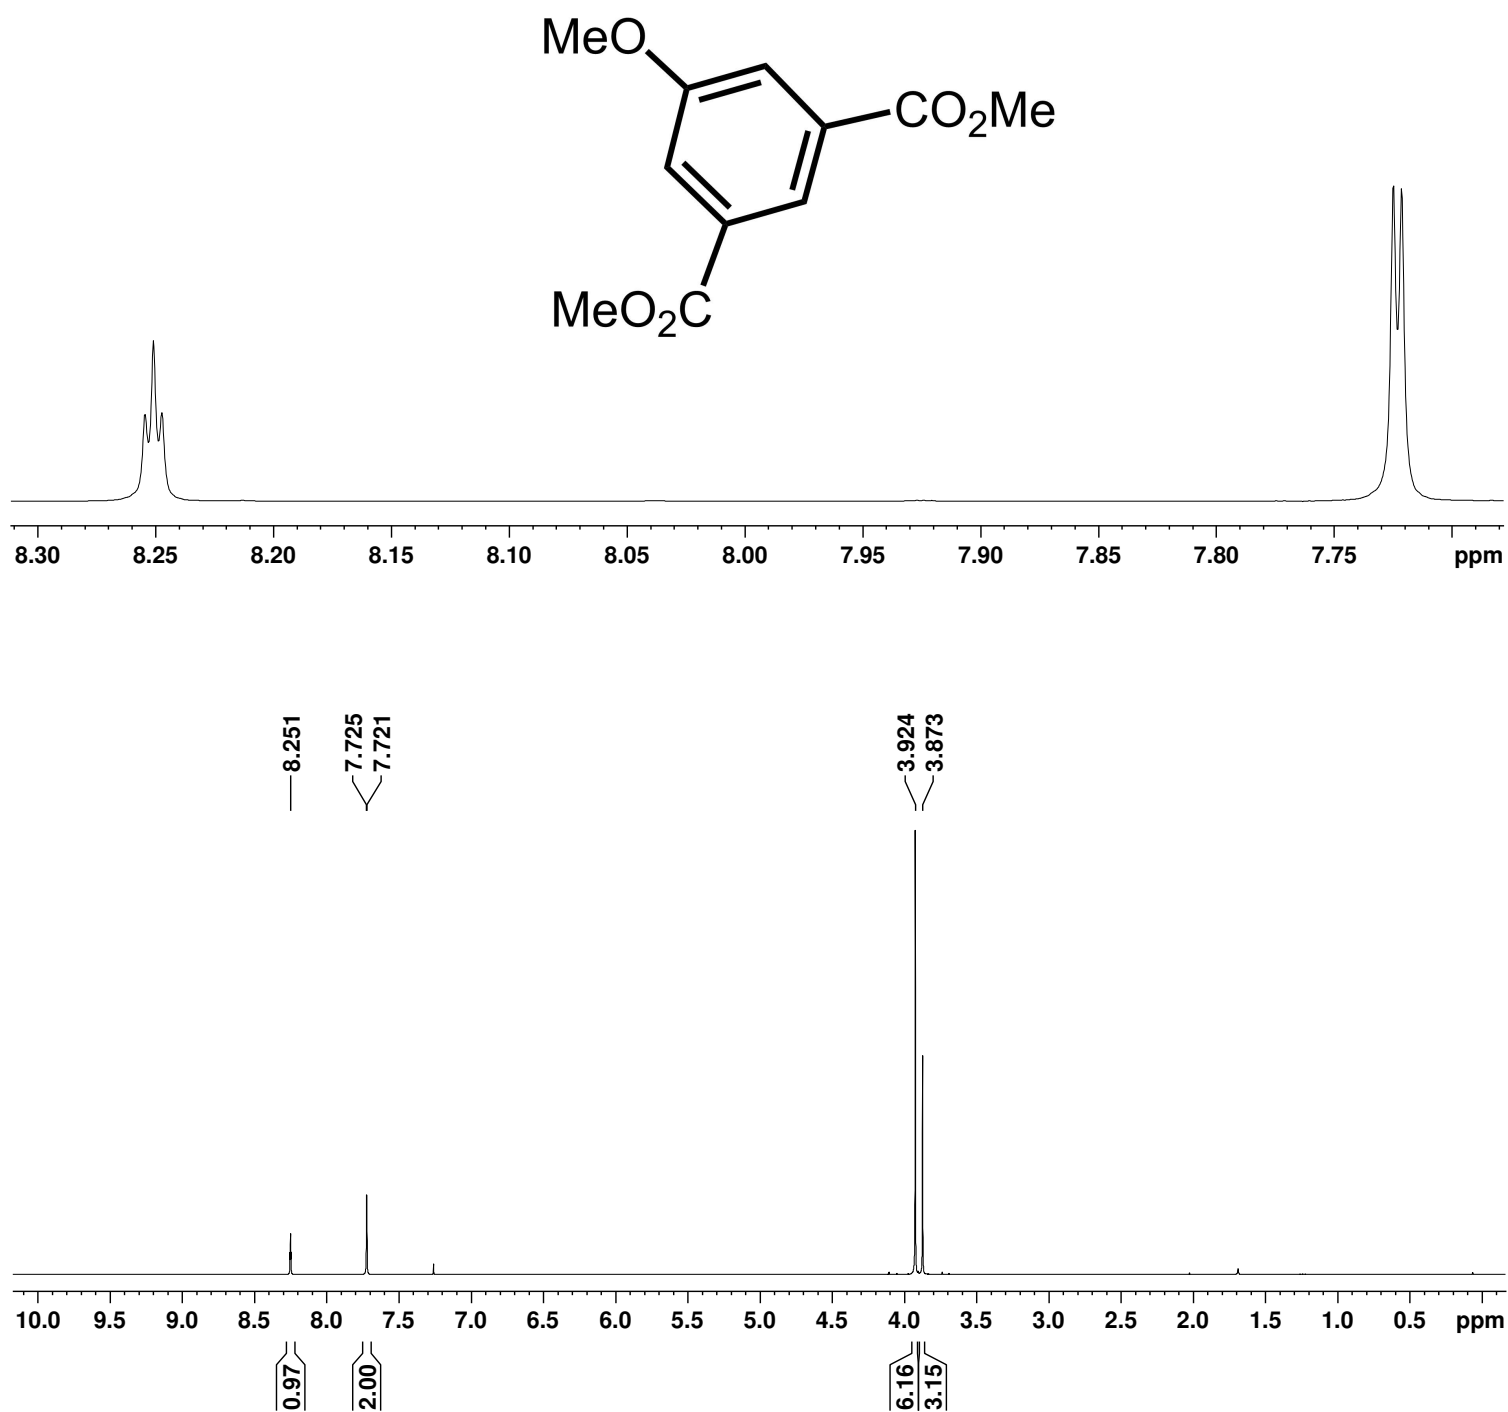

Figure S21. 400 MHz proton NMR spectrum of dimethyl 5-methoxy-1,3-benzenedicarboxylate **11a** in CDCl<sub>3</sub>.



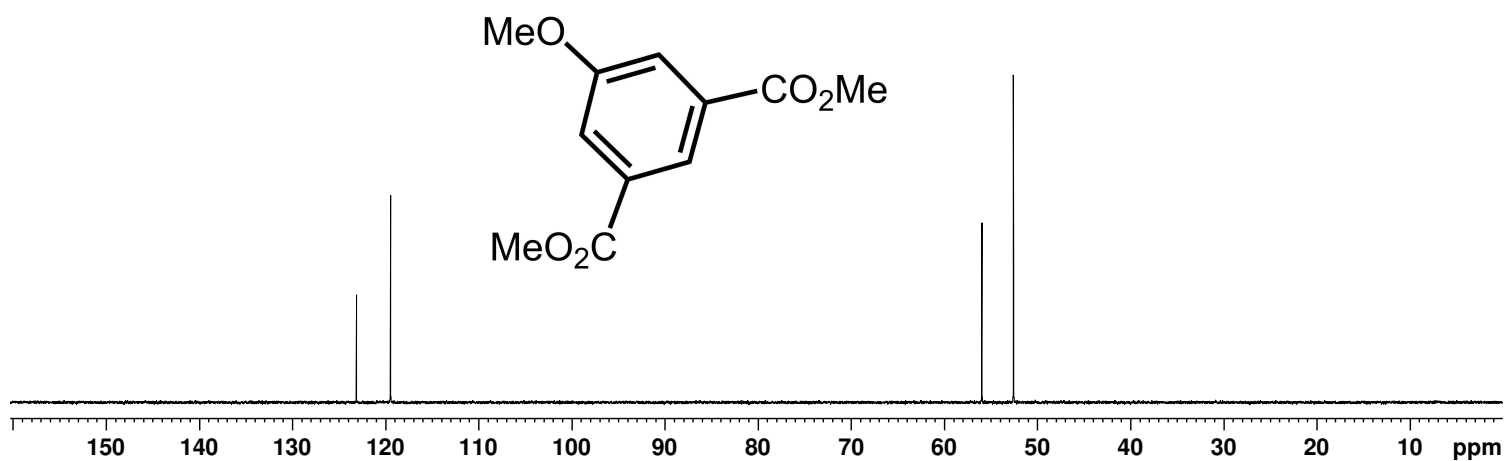

Figure S22. DEPT-135 NMR spectrum of dimethyl 5-methoxy-1,3-benzenedicarboxylate in  $\text{CDCl}_3$ .

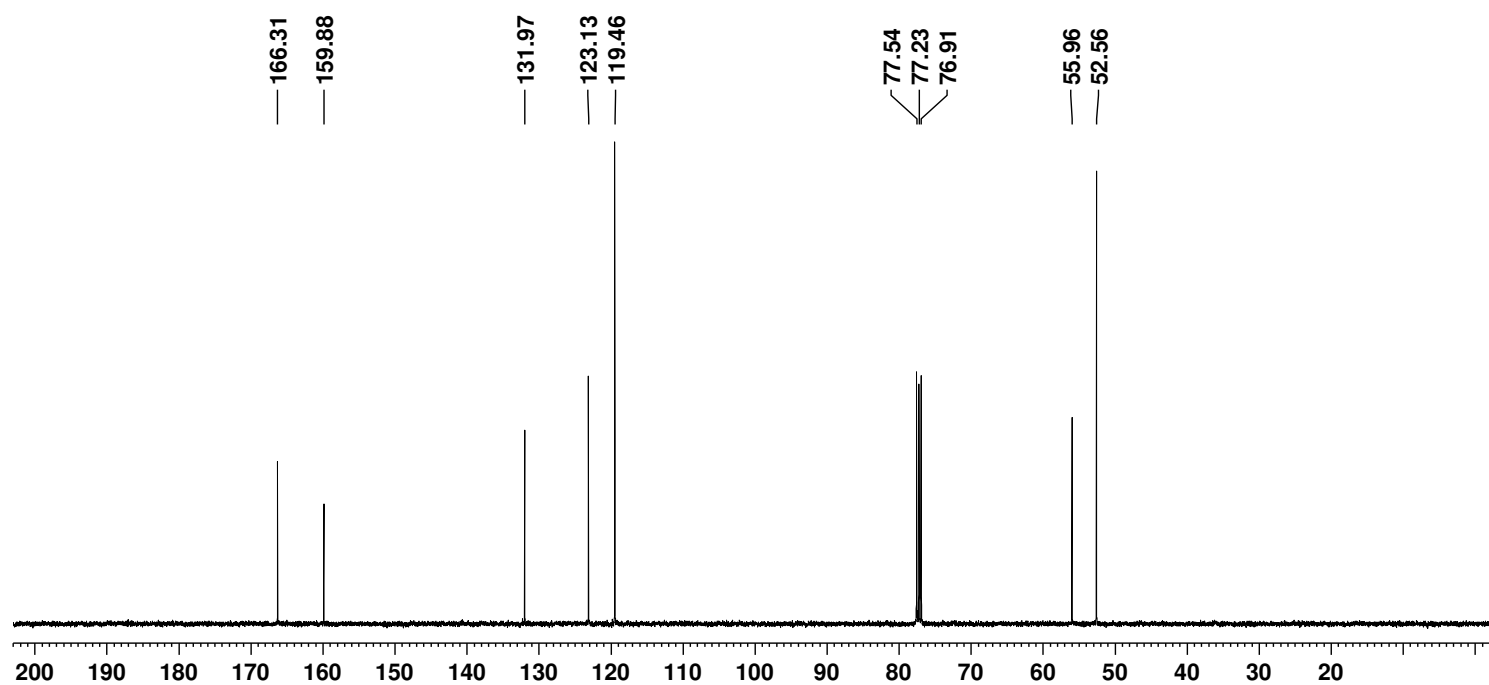

Figure S23. 100 MHz carbon-13 NMR spectrum of dimethyl 5-methoxy-1,3-benzenedicarboxylate in  $\text{CDCl}_3$ .

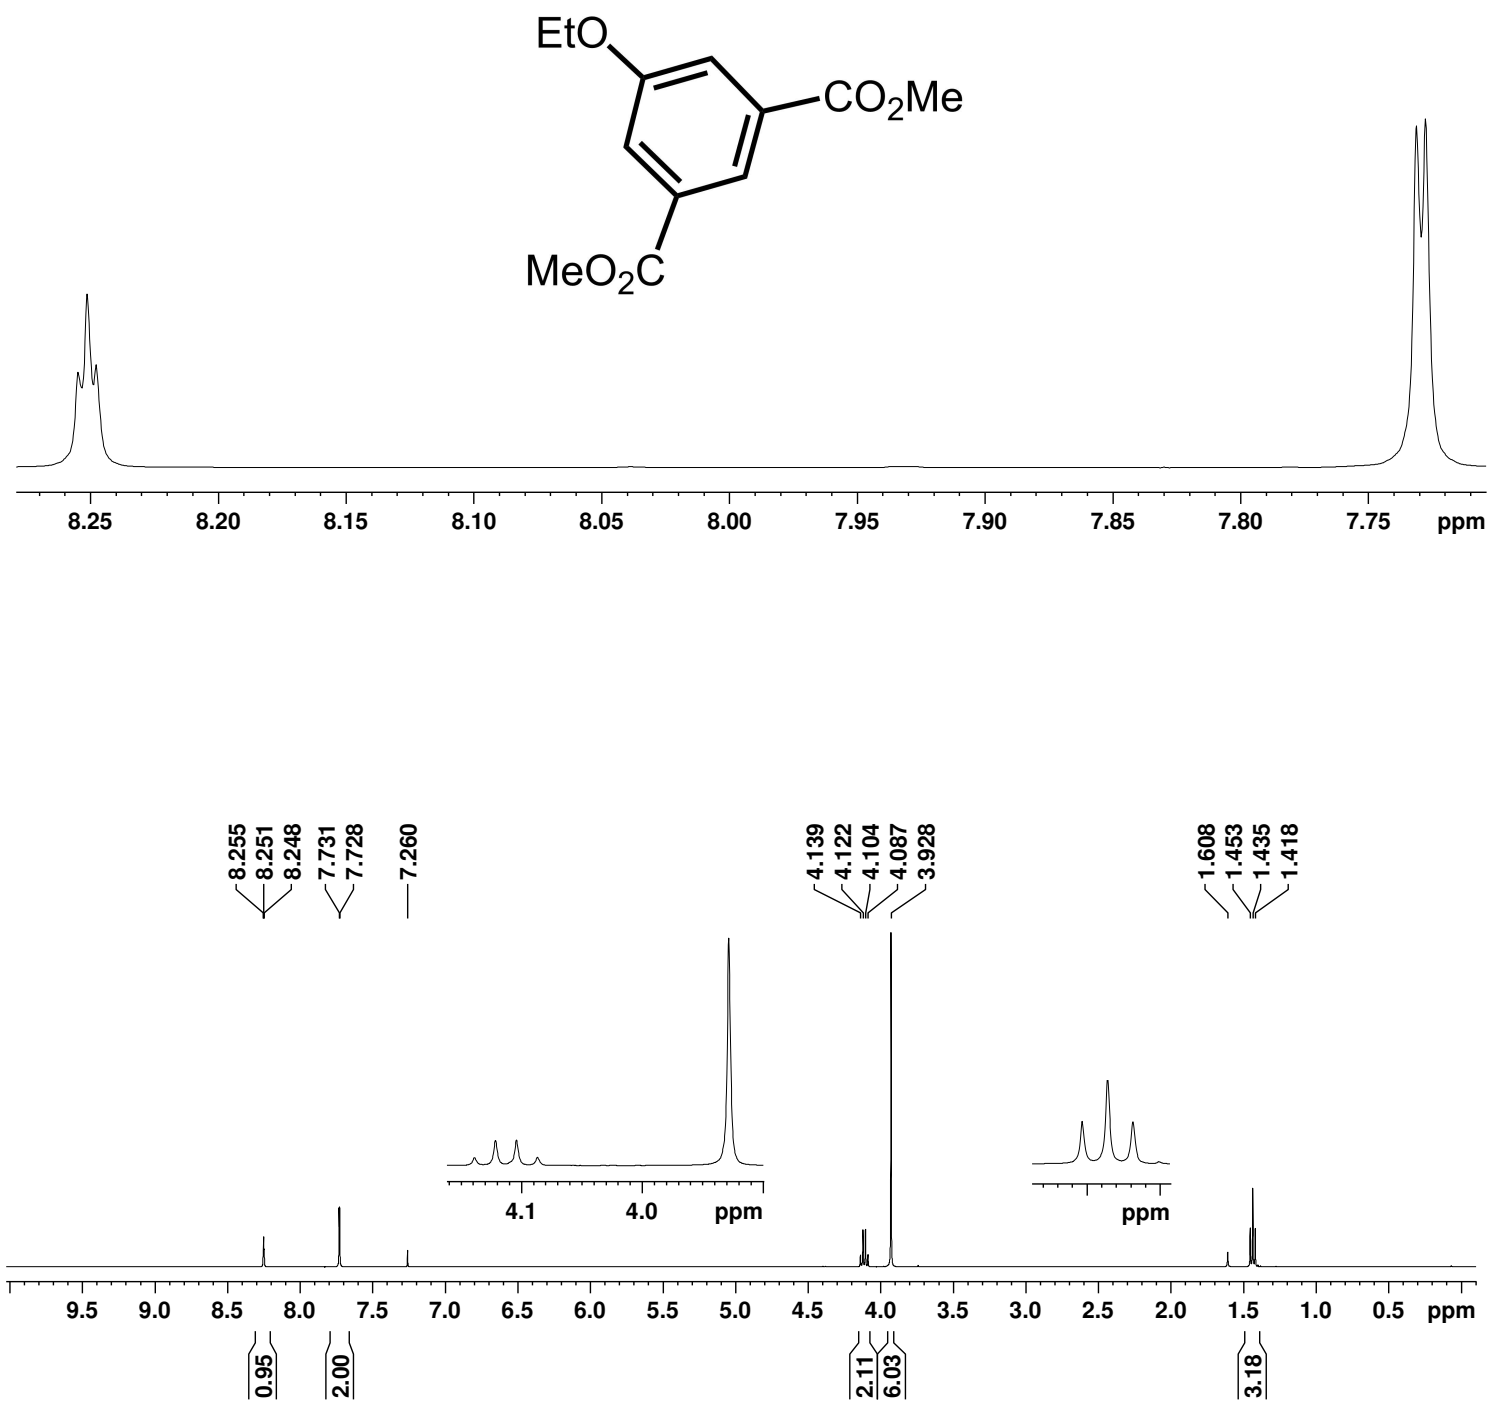

Figure S24. 400 MHz proton NMR spectrum of dimethyl 5-ethoxy-1,3-benzenedicarboxylate **11b** in CDCl<sub>3</sub>.

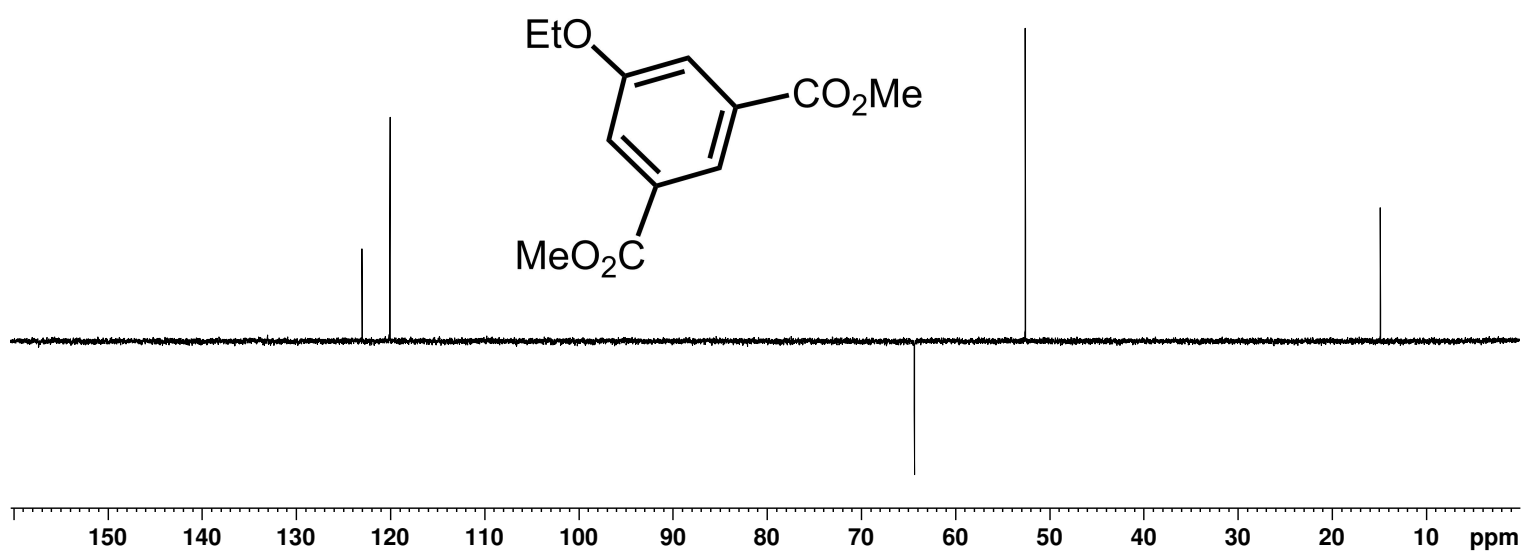

Figure S25. DEPT-135 NMR spectrum of dimethyl 5-ethoxy-1,3-benzenedicarboxylate in  $\text{CDCl}_3$ .

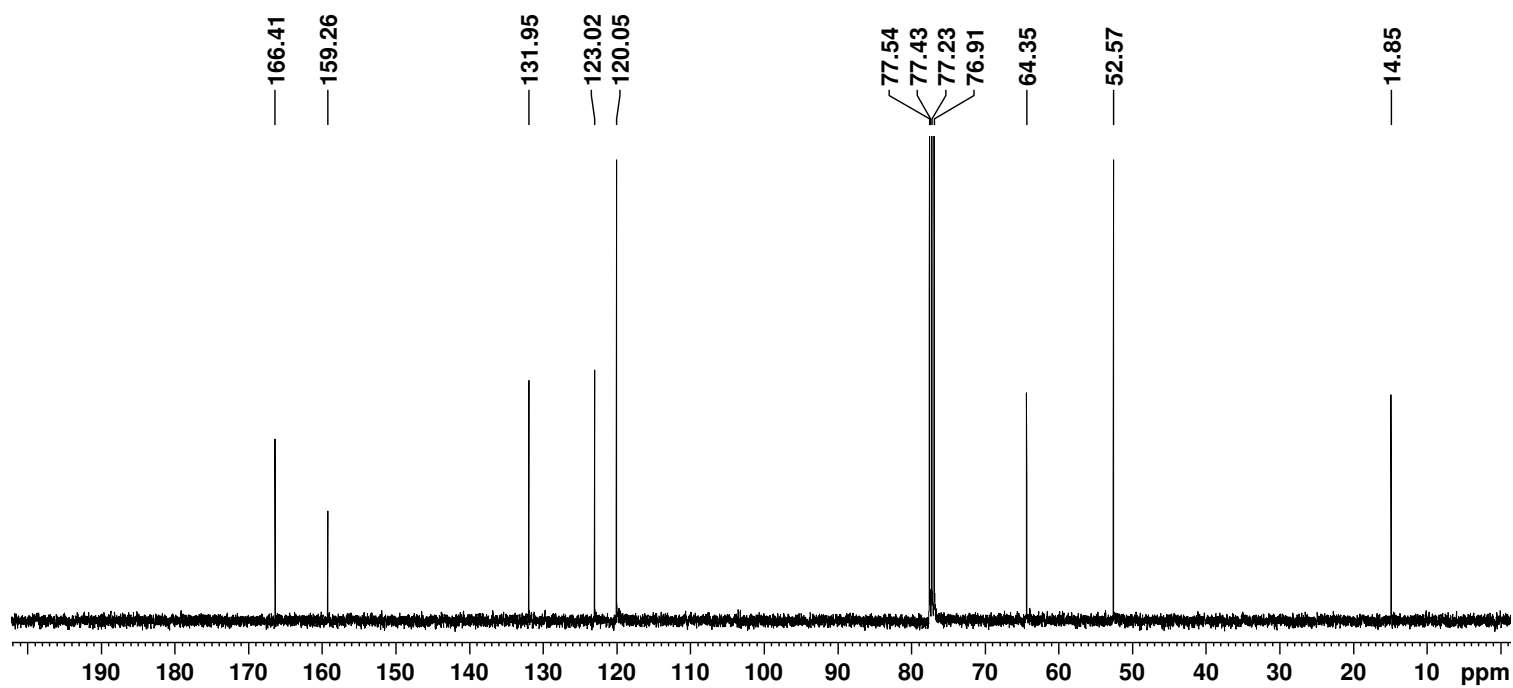

Figure S26. 100 MHz carbon-13 NMR spectrum of dimethyl 5-ethoxy-1,3-benzenedicarboxylate in  $\text{CDCl}_3$ .

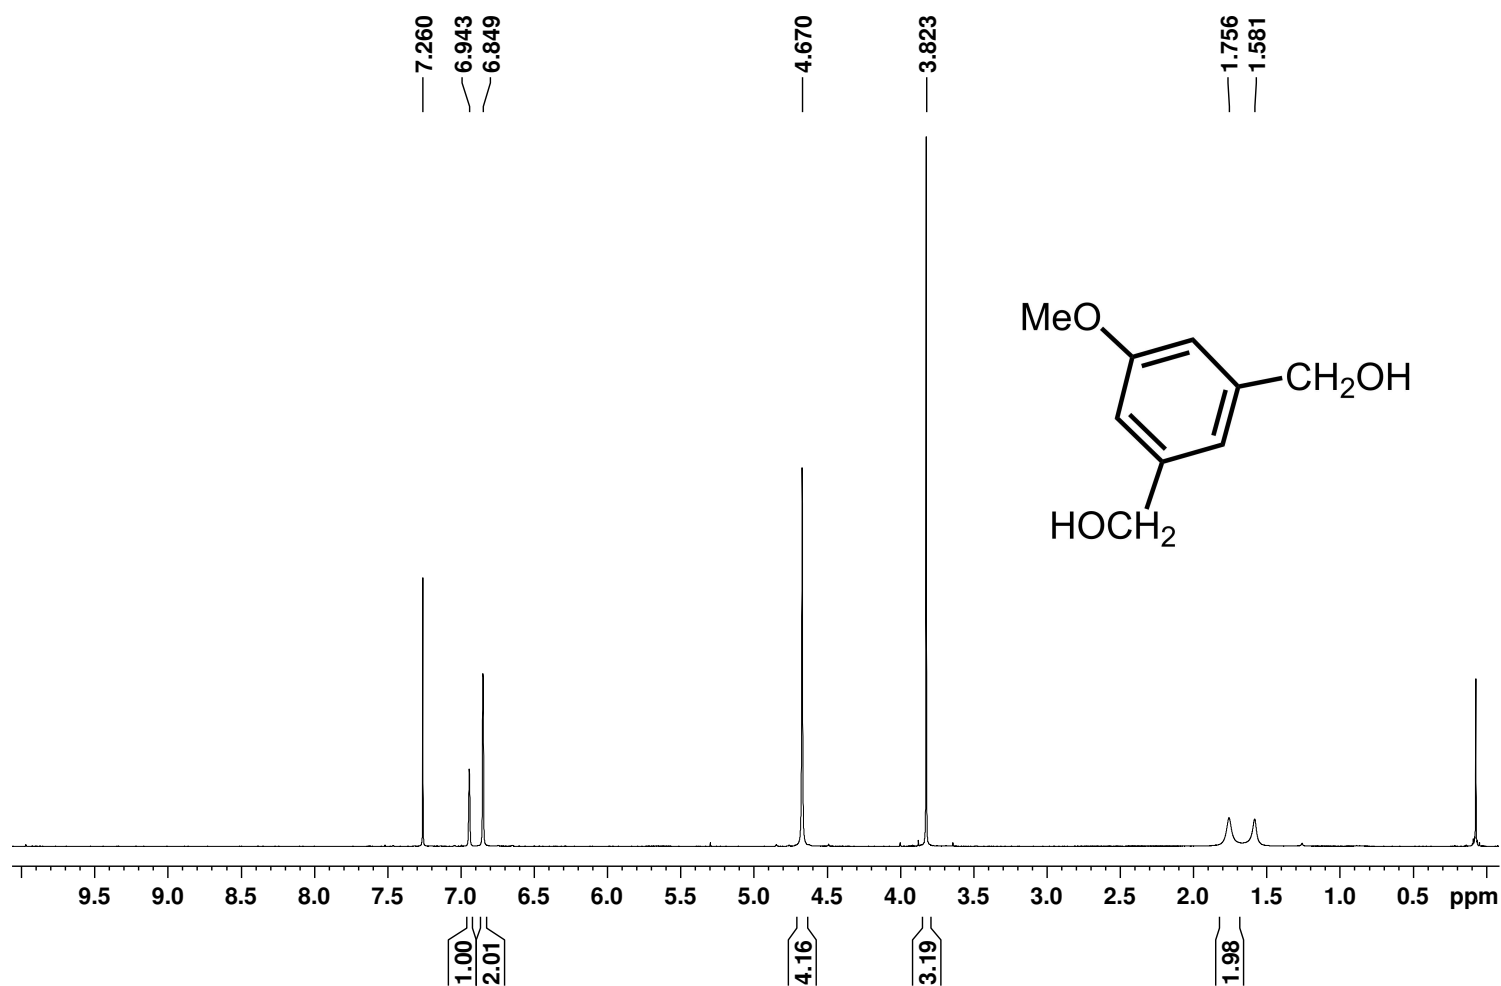

Scheme S27. 400 MHz proton NMR spectrum of methoxybenzenedicarbinol **12a** in CDCl<sub>3</sub>.

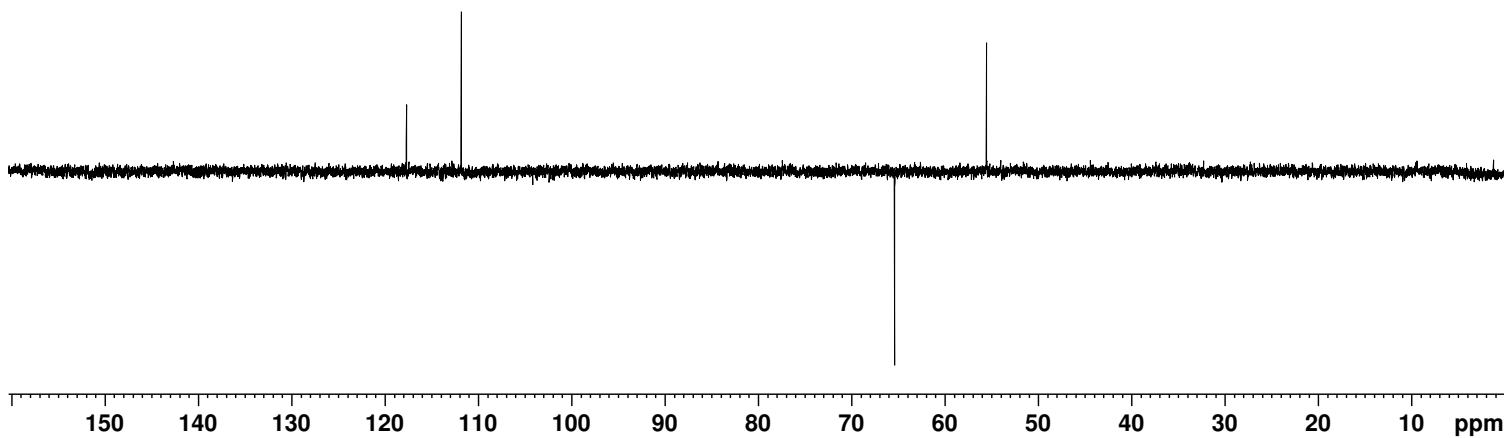

Scheme S28. DEPT-135 NMR spectrum of methoxybenzenedicarbinol **12a** in  $\text{CDCl}_3$ .

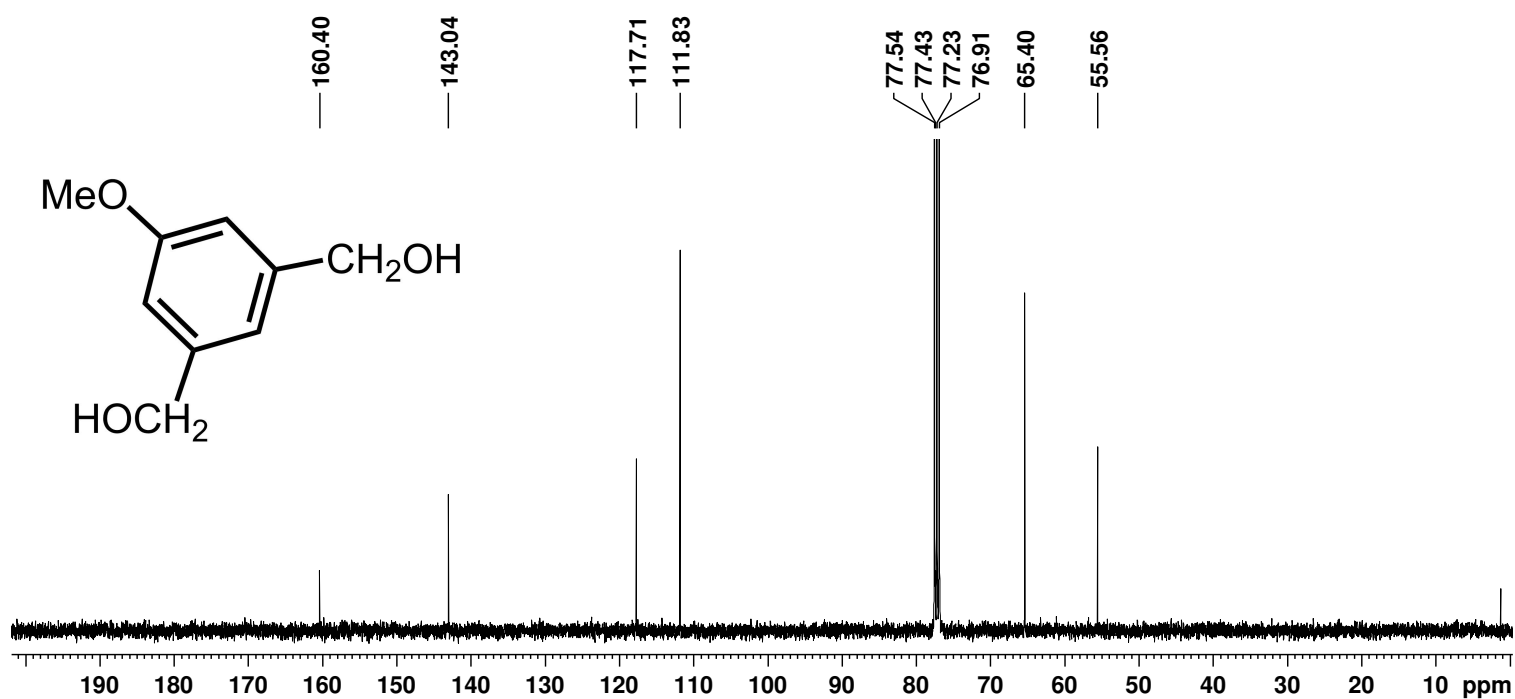

Scheme S29. 100 MHz carbon-13 NMR spectrum of methoxybenzenedicarbinol **12a** in  $\text{CDCl}_3$ .

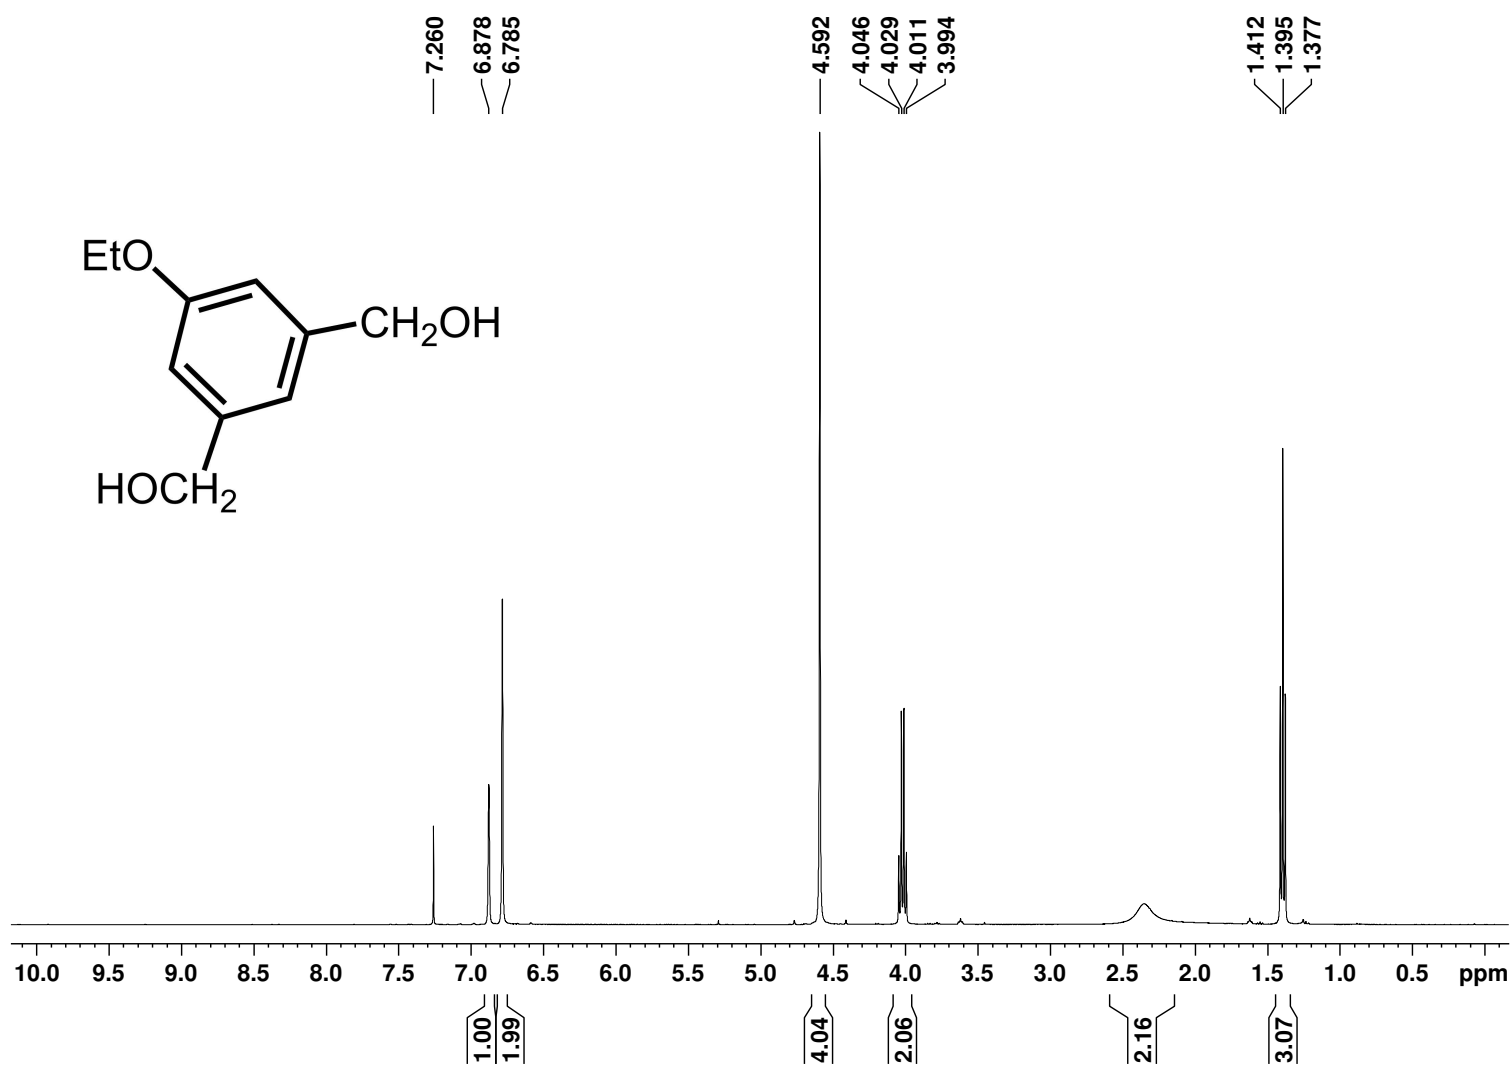

Scheme S30. 400 MHz proton NMR spectrum of ethoxybenzenedicarbinol **12b** in CDCl<sub>3</sub>.

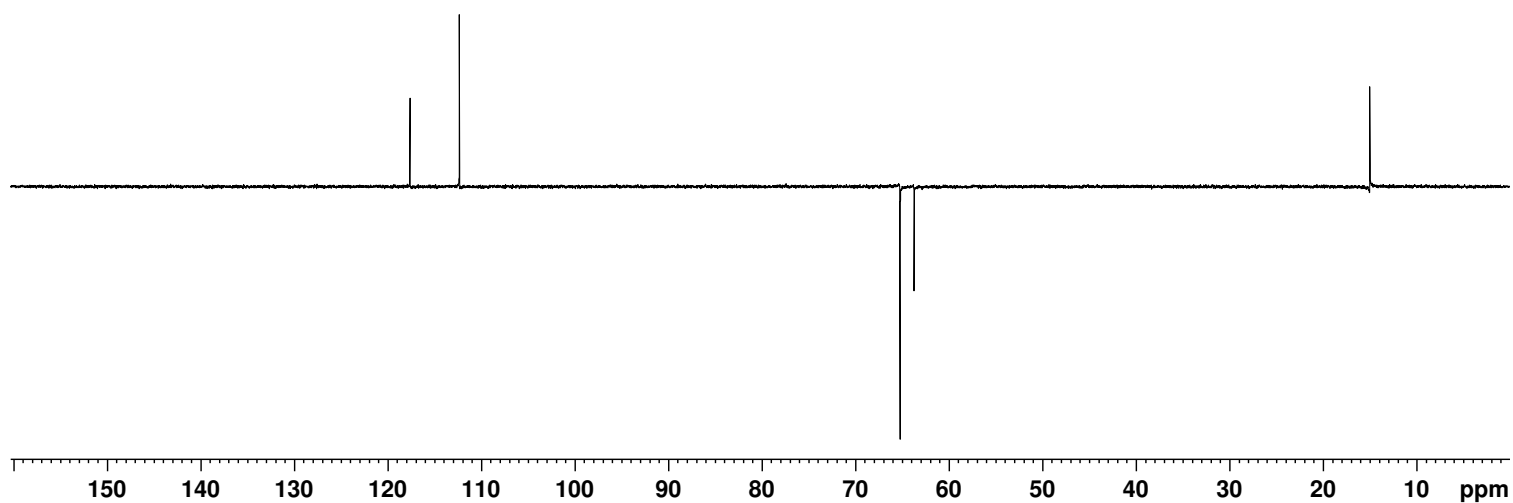

Scheme S31. DEPT-135 NMR spectrum of ethoxybenzenedicarbinol **12b** in CDCl<sub>3</sub>.

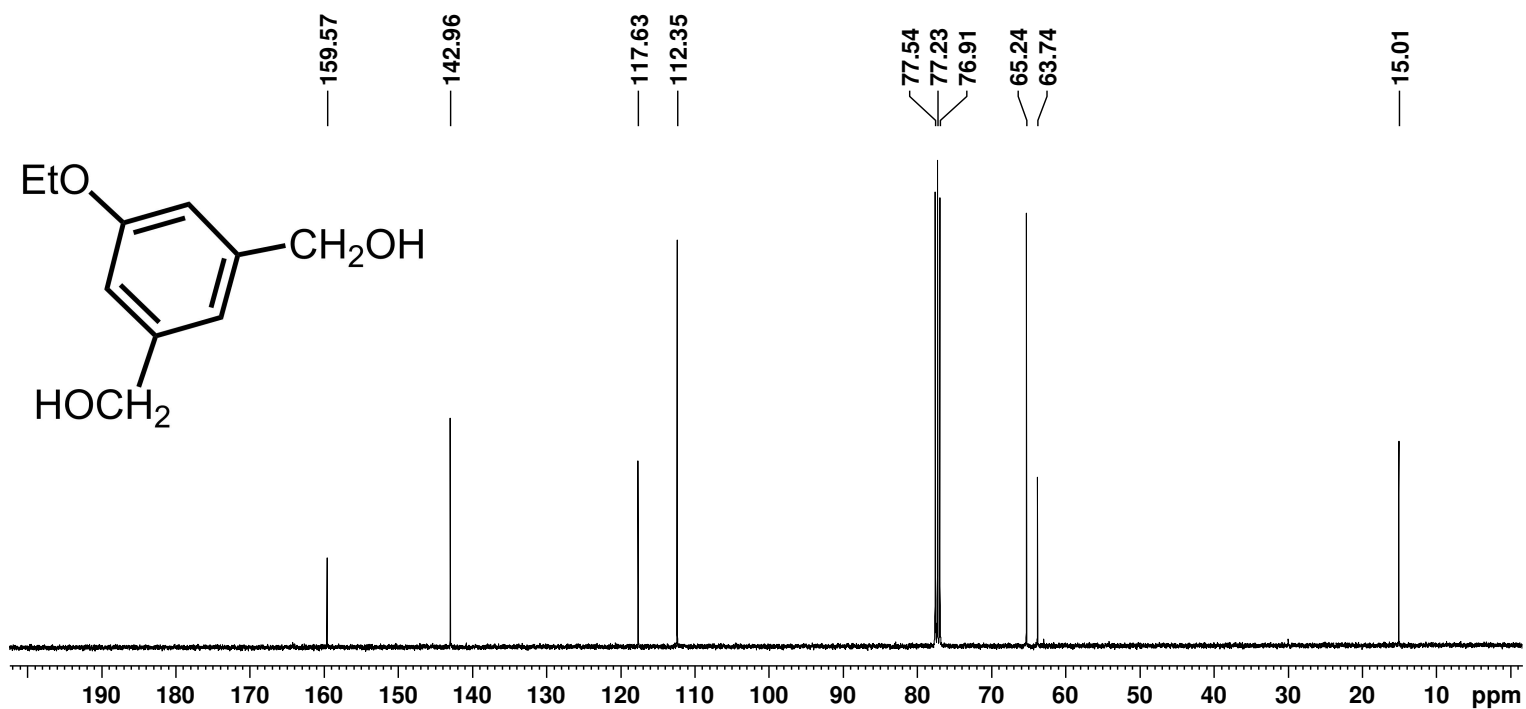

Scheme S32. 100 MHz carbon-13 NMR spectrum of ethoxybenzenedicarbinol **12b** in CDCl<sub>3</sub>.

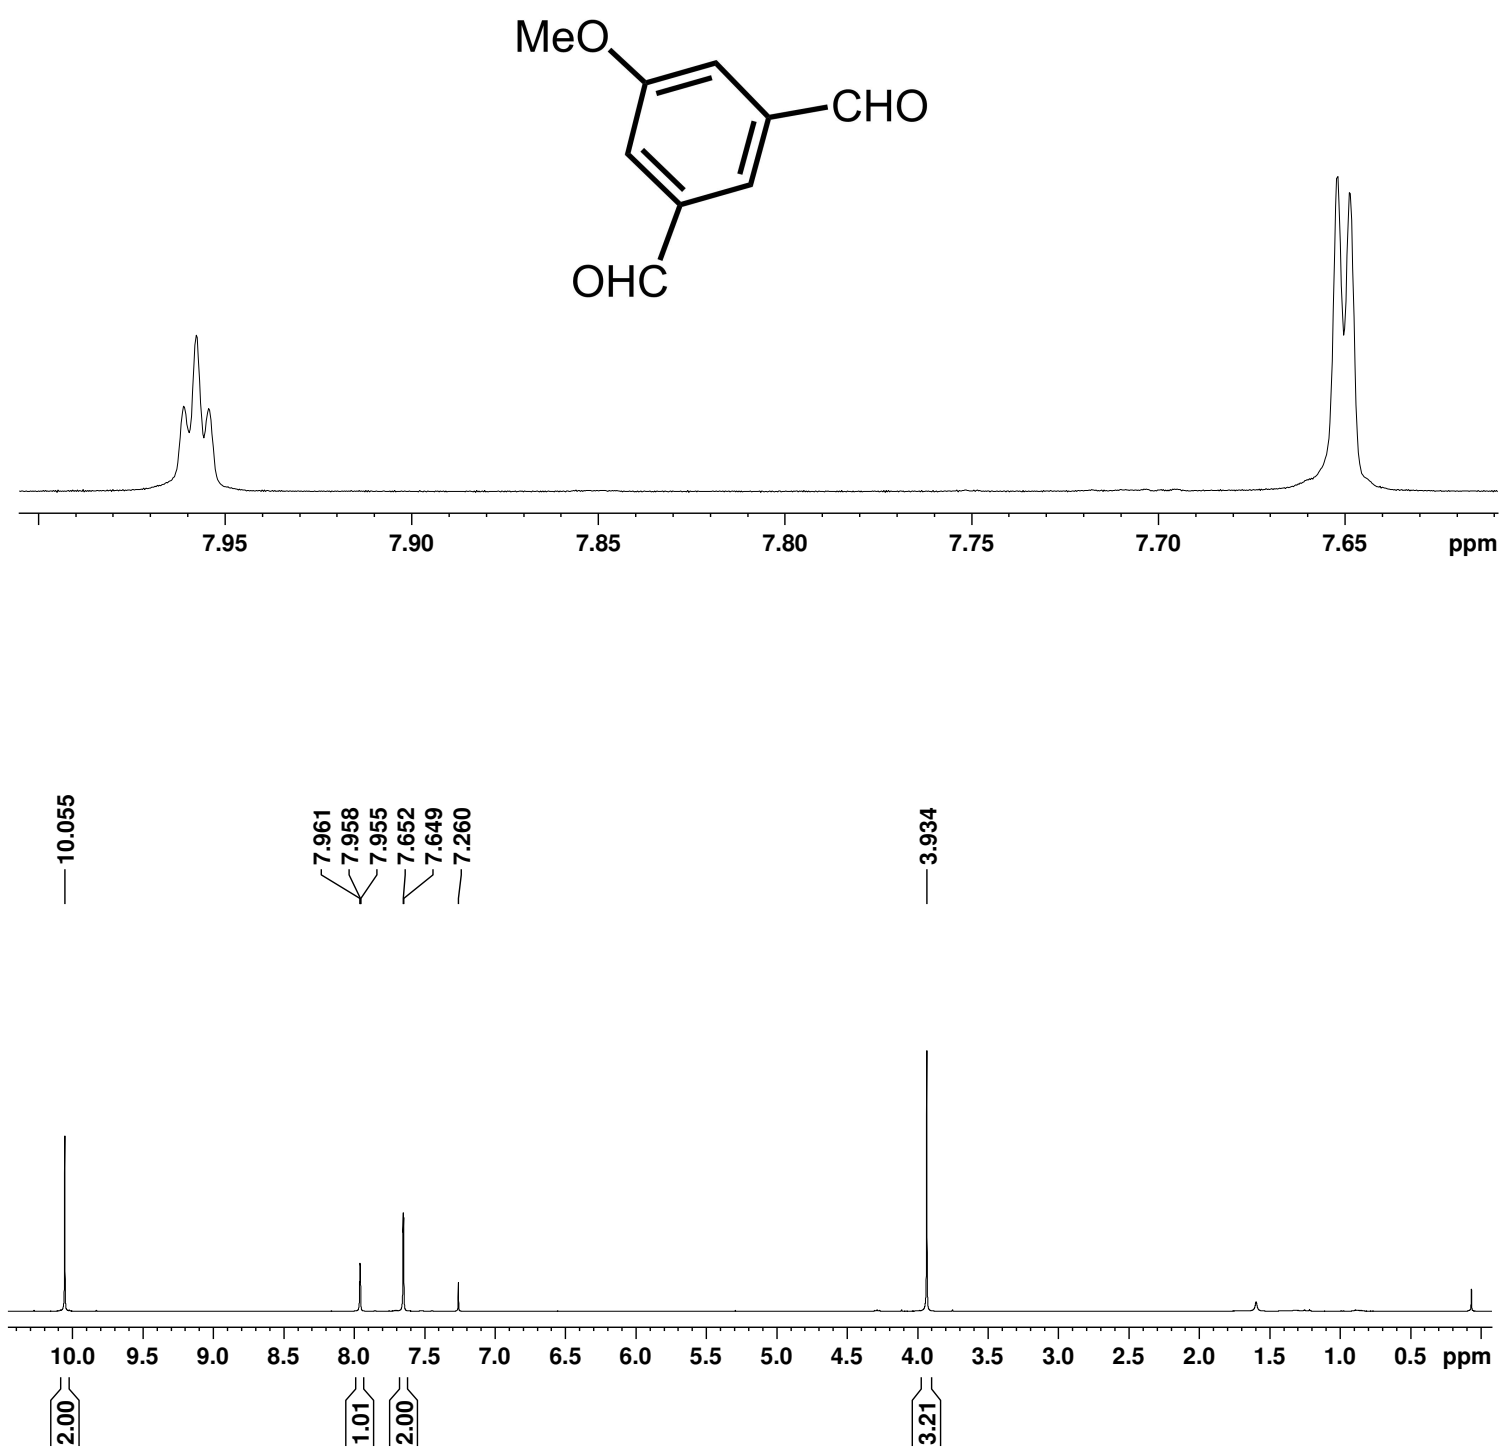

Figure S33. 400 MHz proton NMR spectrum of 5-methoxy-1,3-benzenedicarbaldehyde (**8a**) in CDCl<sub>3</sub>.



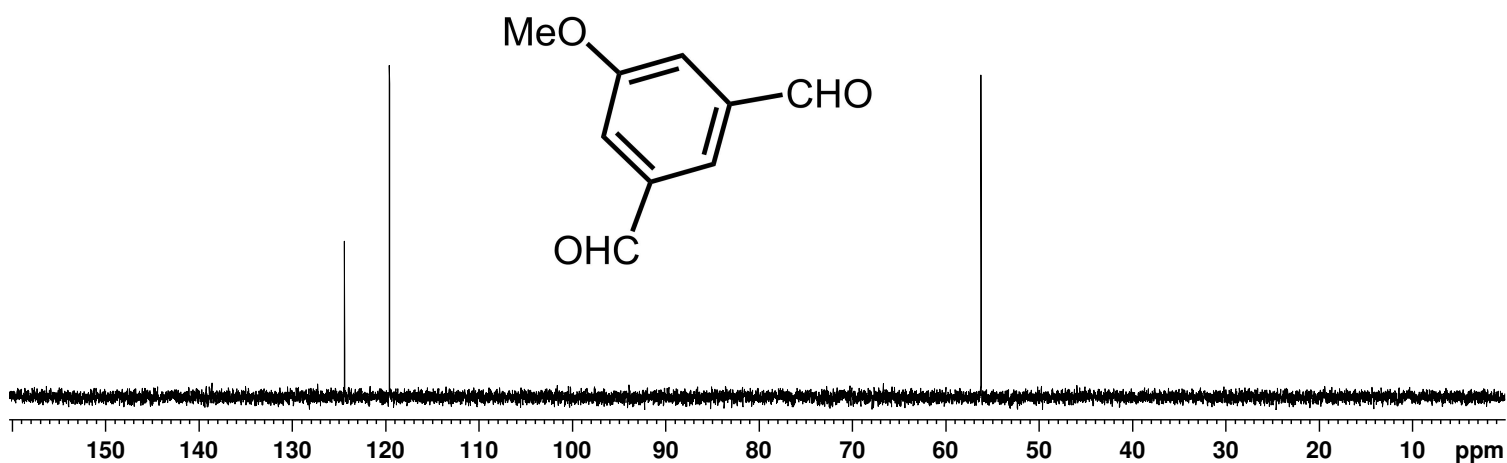

Figure S34. DEPT-135 NMR spectrum of 5-methoxy-1,3-benzene dicarbaldehyde (**8a**) in  $\text{CDCl}_3$ .

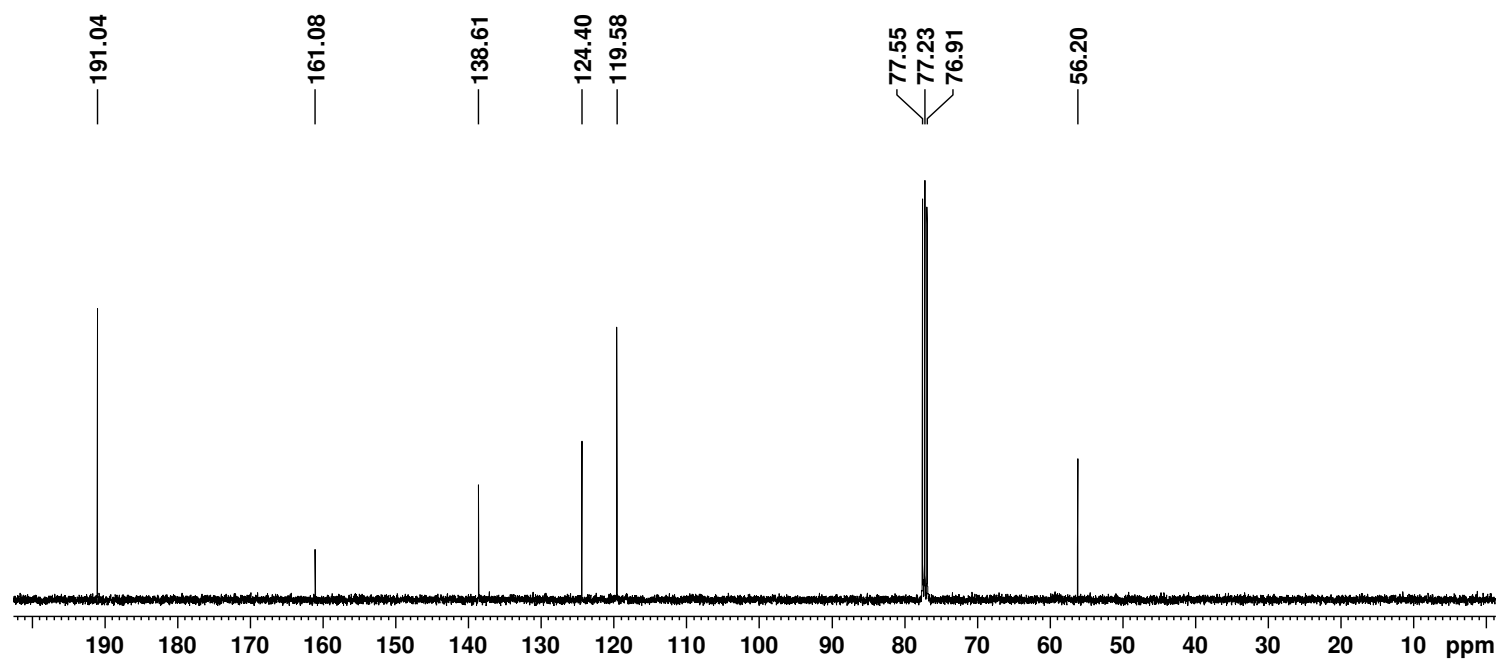

Figure S35. 100 MHz carbon- $^{13}$  NMR spectrum of 5-methoxy-1,3-benzene dicarbaldehyde (**8a**) in  $\text{CDCl}_3$ .

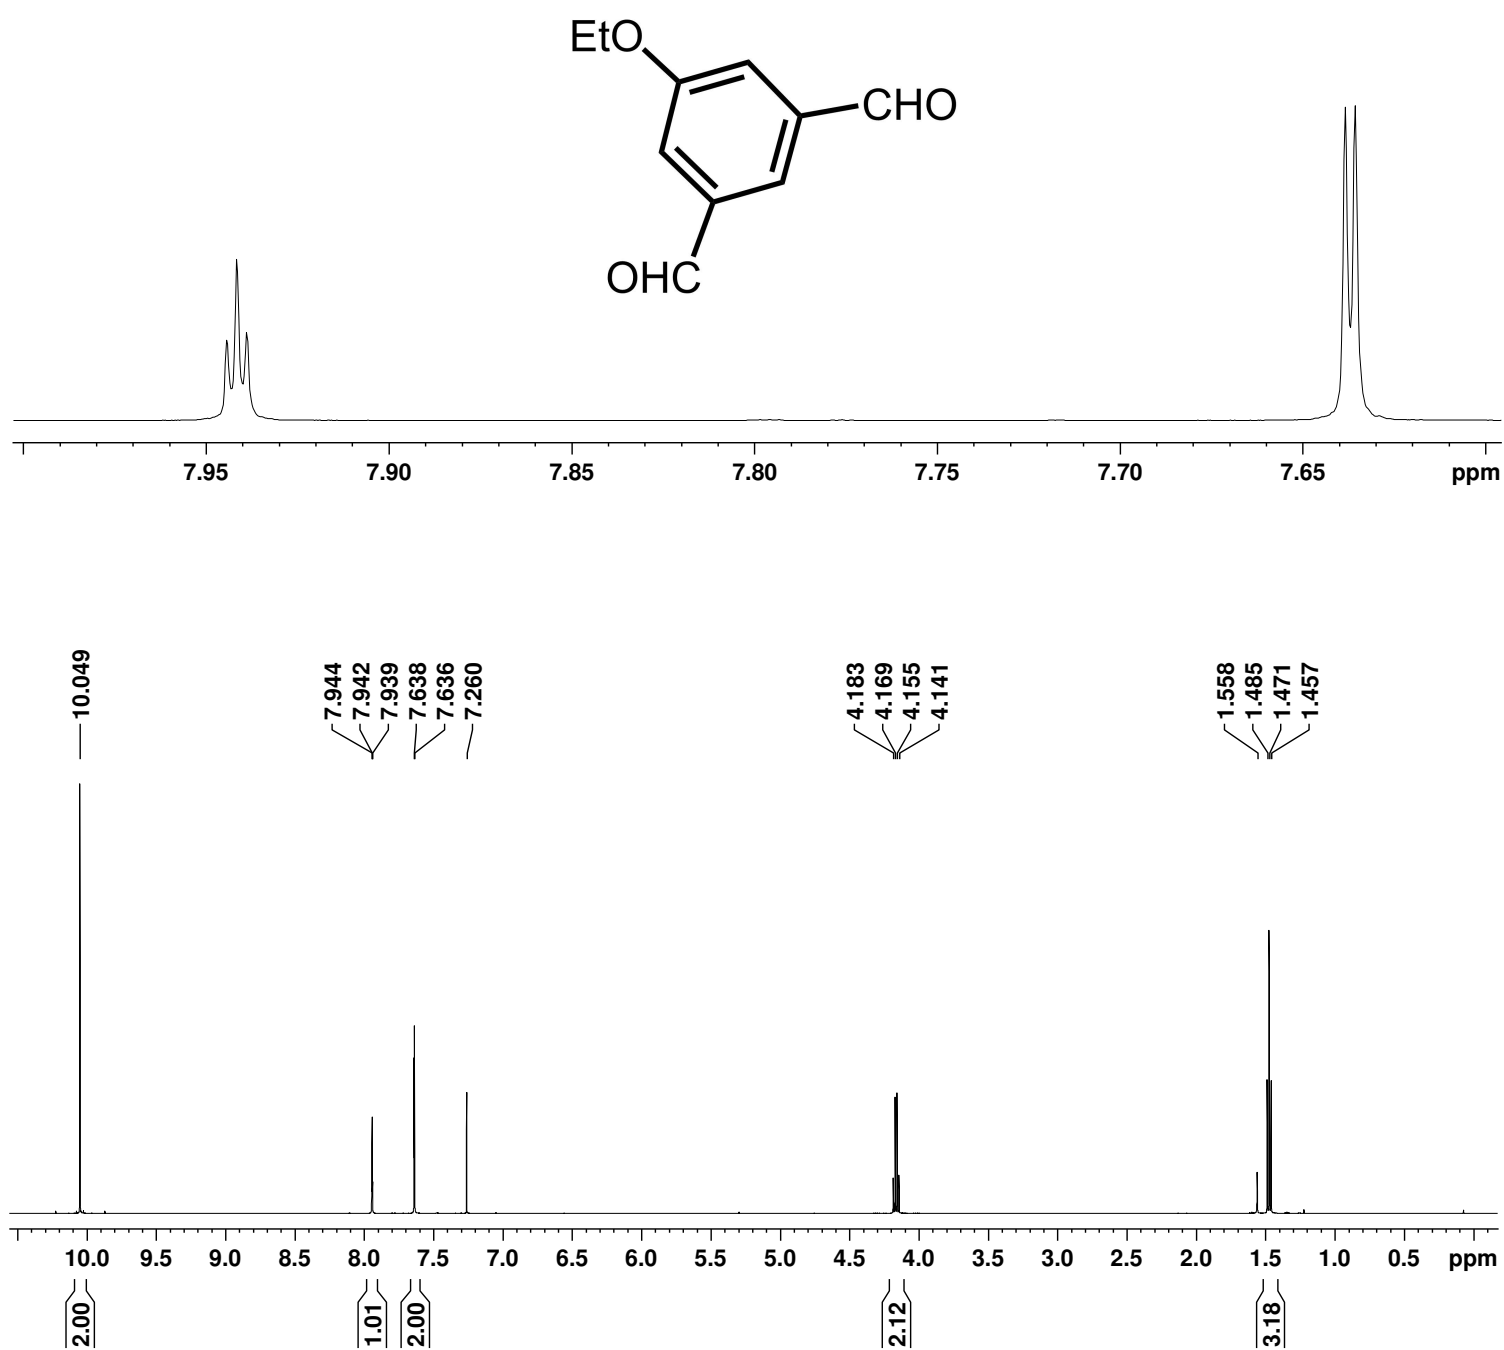

Figure S36. 500 MHz proton NMR spectrum of 5-ethoxy-1,3-benzene dicarbaldehyde (**8b**) in CDCl<sub>3</sub>.

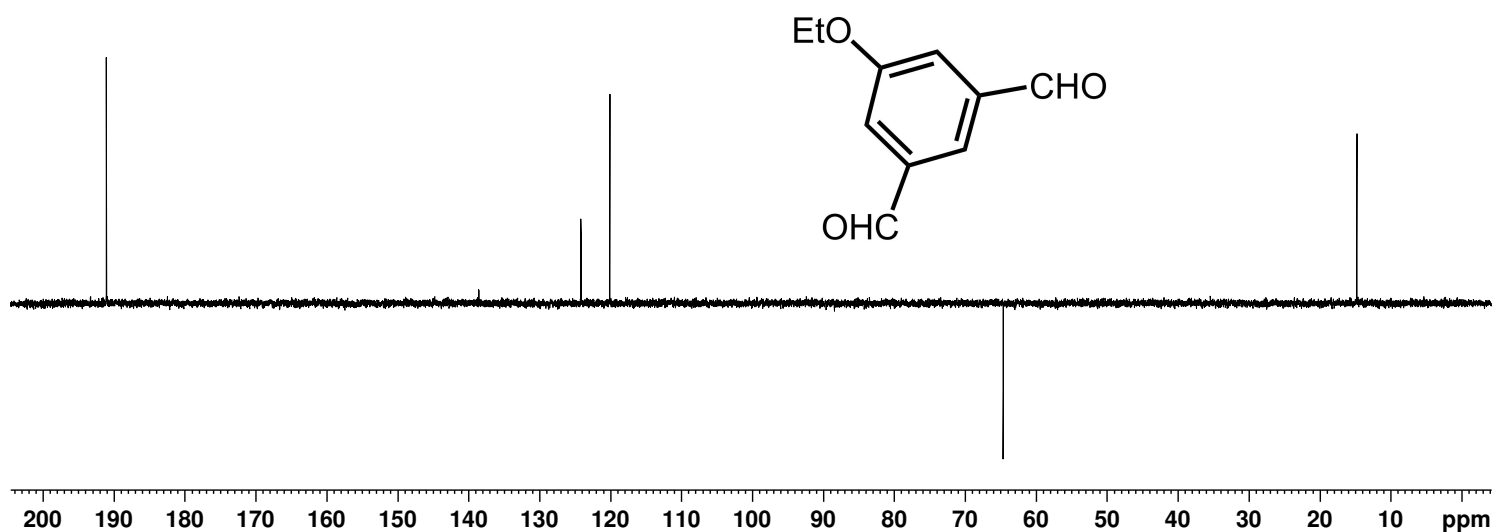

Figure S37. DEPT-135 NMR spectrum of 5-ethoxy-1,3-benzenedicarbaldehyde (**8b**) in  $\text{CDCl}_3$ .

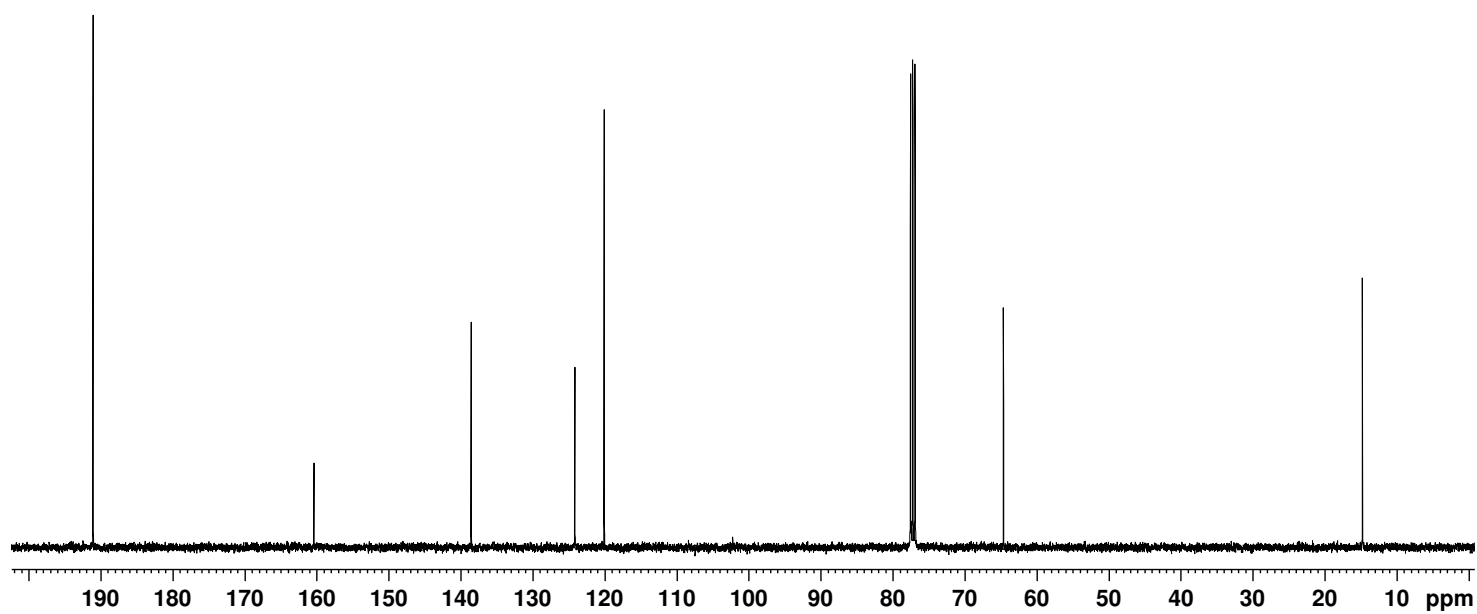

Figure S38. 125 MHz carbon-13 NMR spectrum of 5-ethoxy-1,3-benzenedicarbaldehyde (**8b**) in  $\text{CDCl}_3$ .

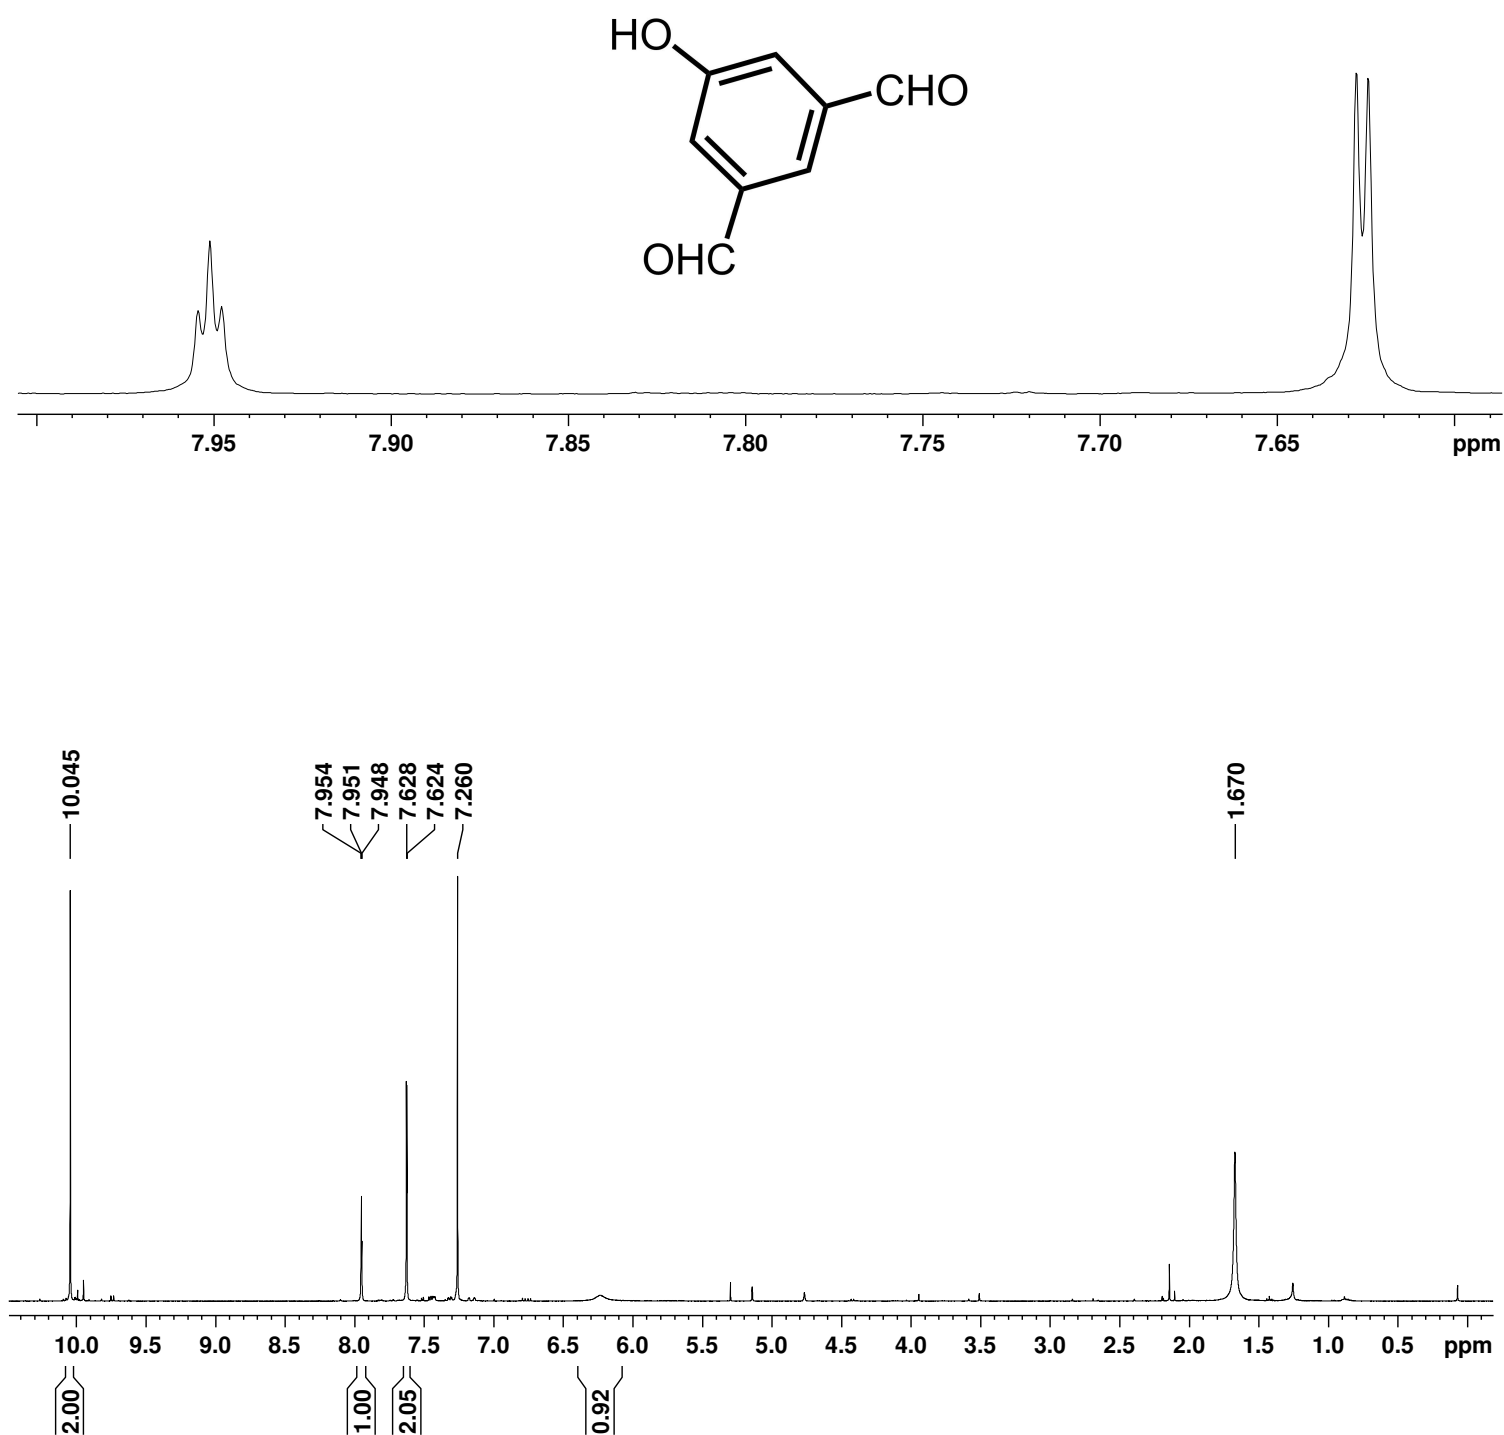

Figure S39. 400 MHz proton NMR spectrum of 5-hydroxy-1,3-benzene dicarbaldehyde (**14**) in CDCl<sub>3</sub>.

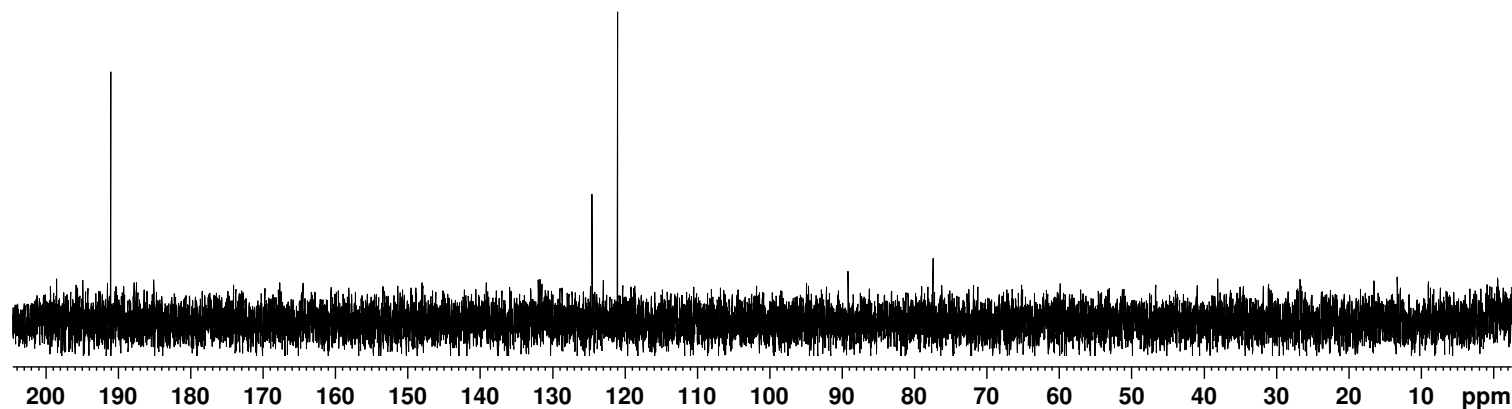

Figure S40. DEPT-135 NMR spectrum of 5-hydroxy-1,3-benzene dicarbaldehyde (**14**) in  $\text{CDCl}_3$ .

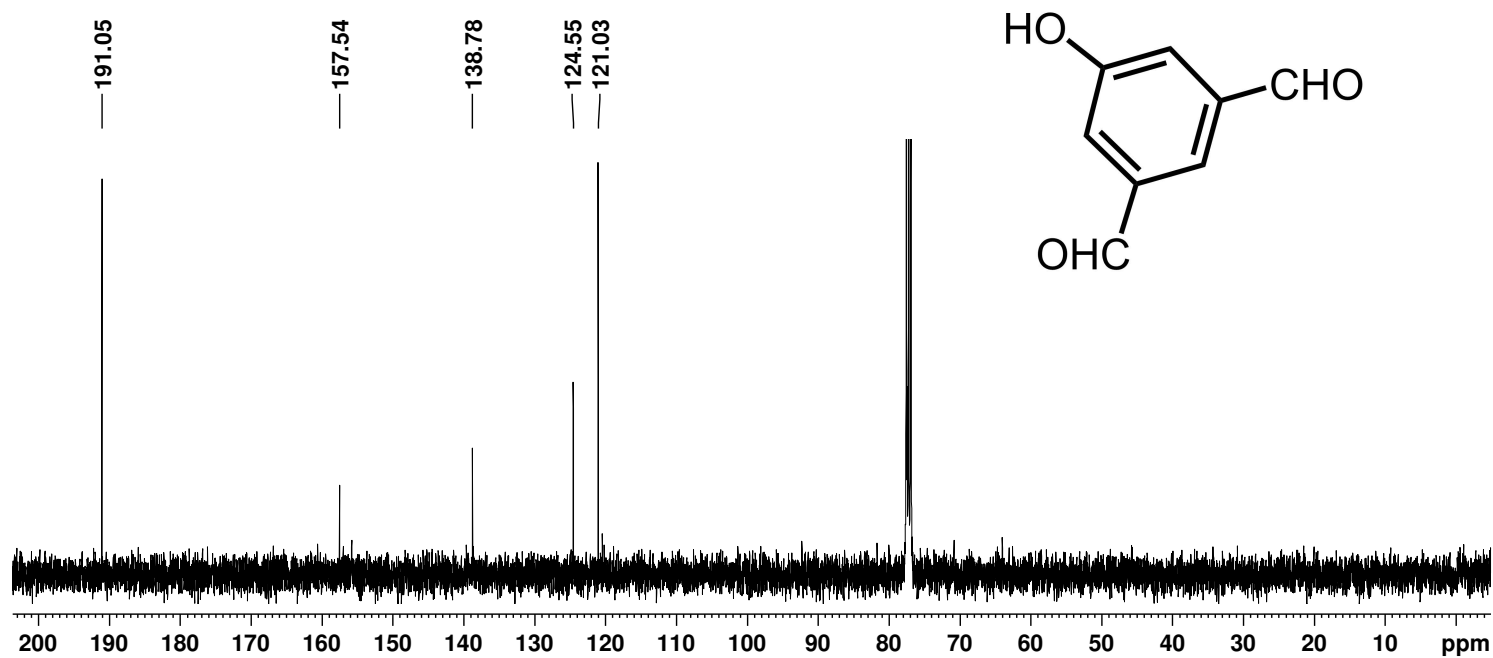

Figure S41. 100 MHz carbon-13 NMR spectrum of 5-hydroxy-1,3-benzene dicarbaldehyde (**14**) in  $\text{CDCl}_3$ .

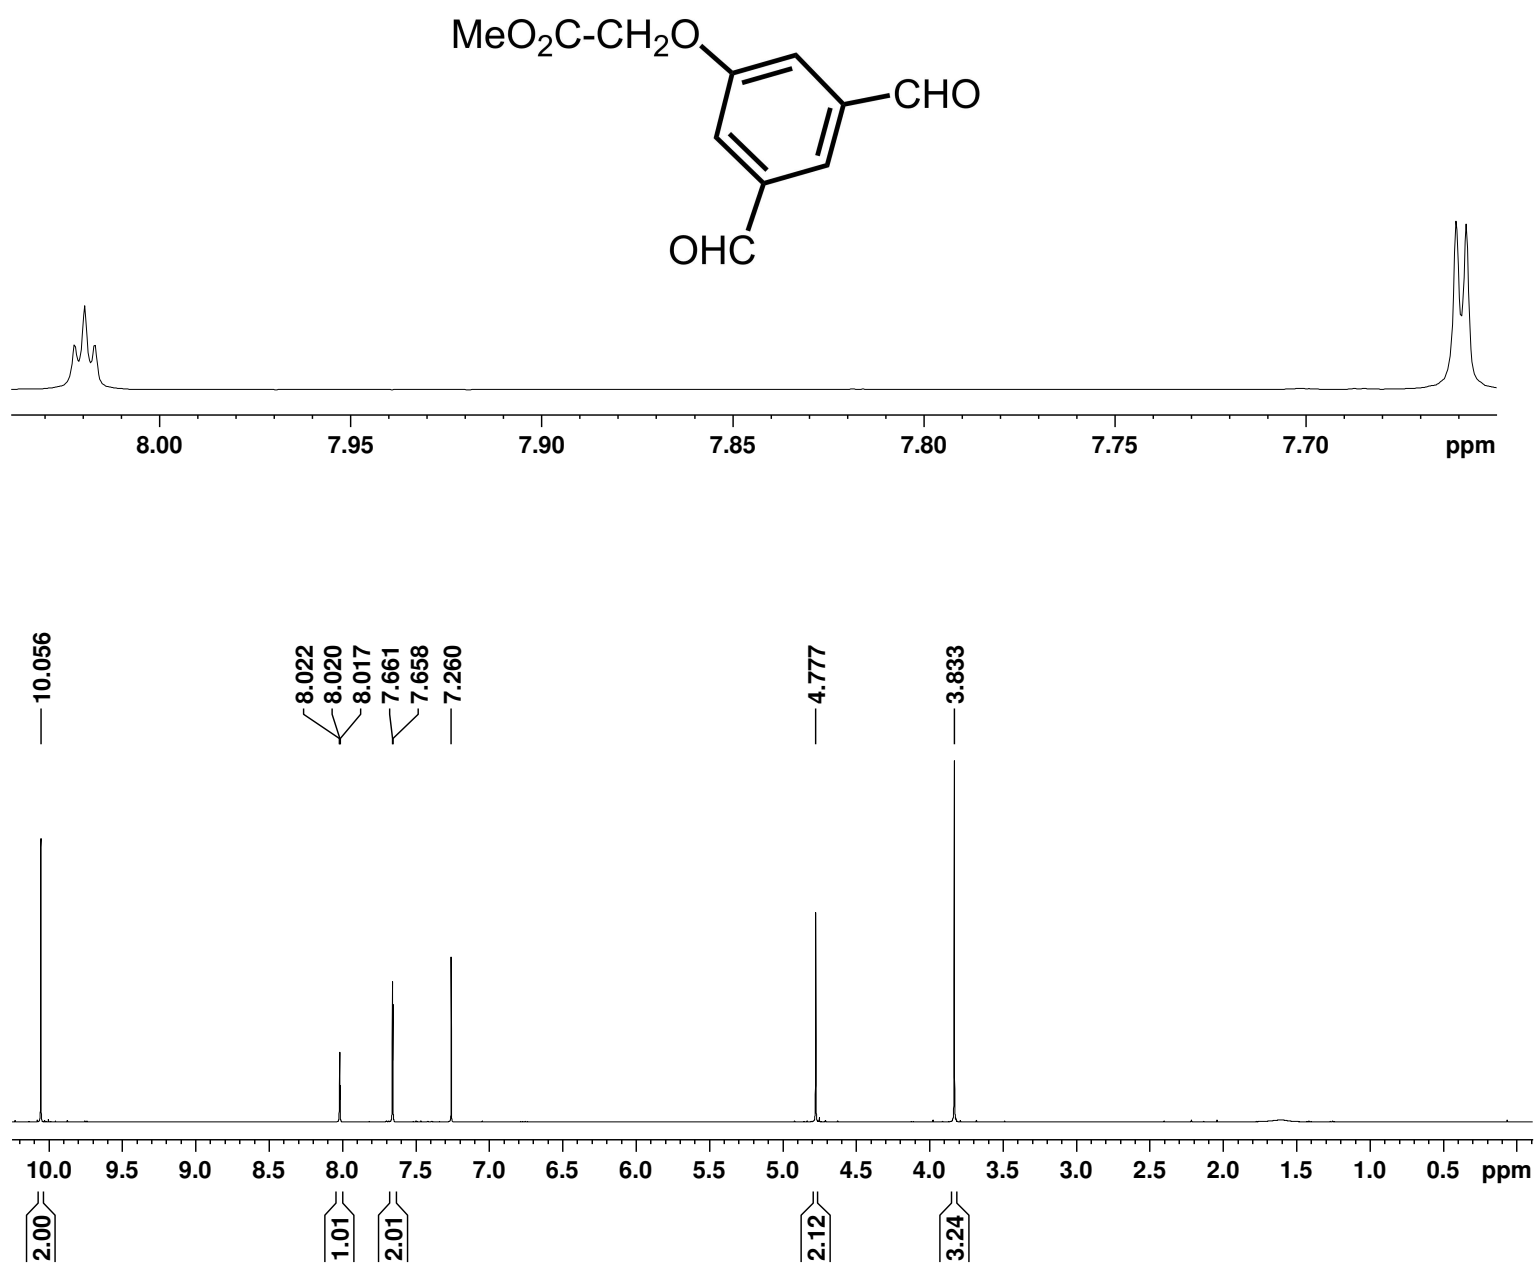

Figure S42. 500 MHz proton NMR spectrum of 5(methoxycarbonylmethyl)-1,3-benzene dicarbaldehyde (**8c**) in CDCl<sub>3</sub>.

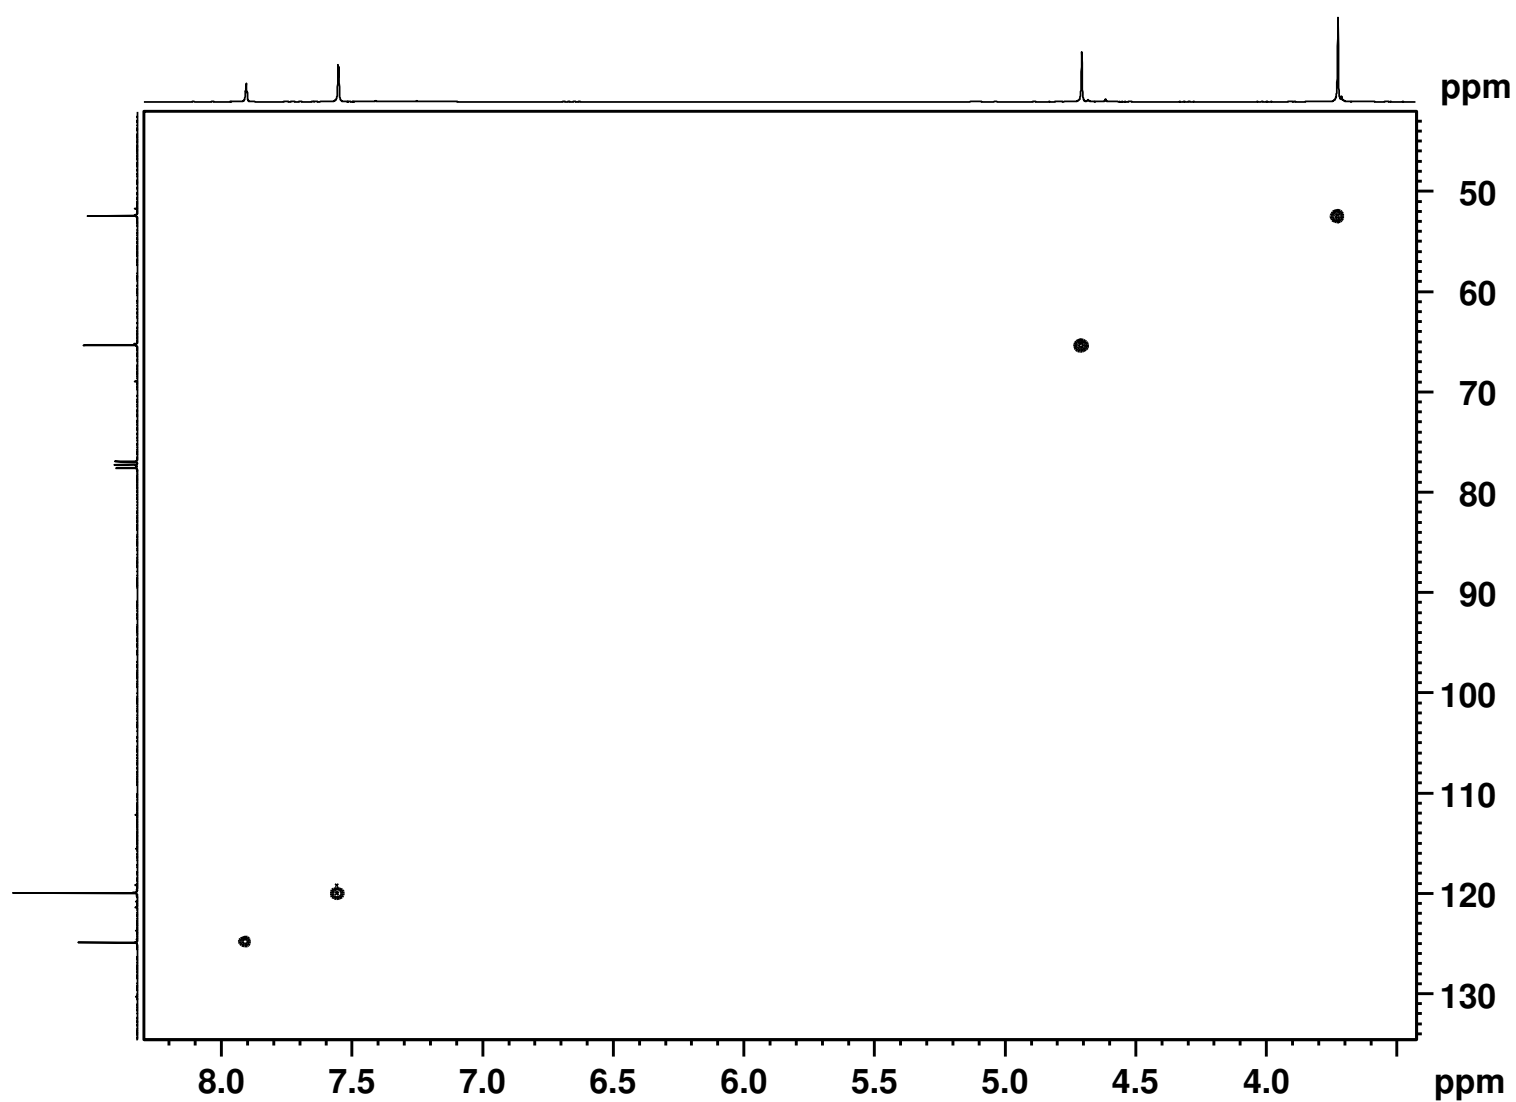

Figure S43. HSQC NMR spectrum of **8c** in  $\text{CDCl}_3$ .

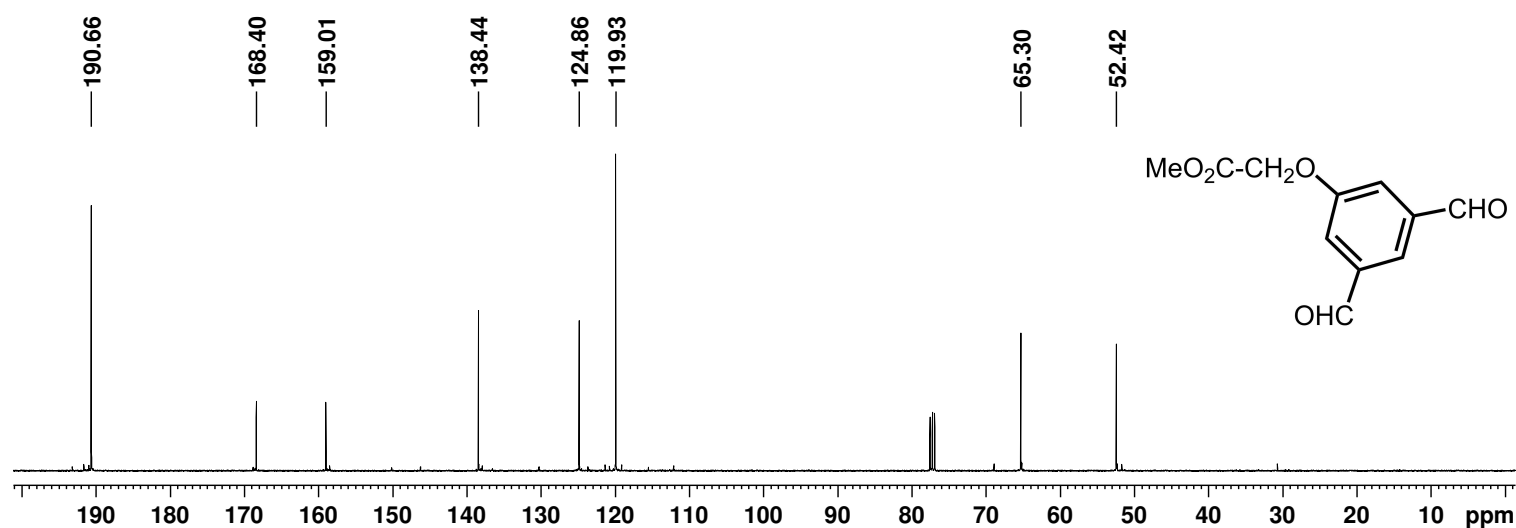

Figure S44. 100 MHz carbon-13 NMR spectrum of **8c** in  $\text{CDCl}_3$ .

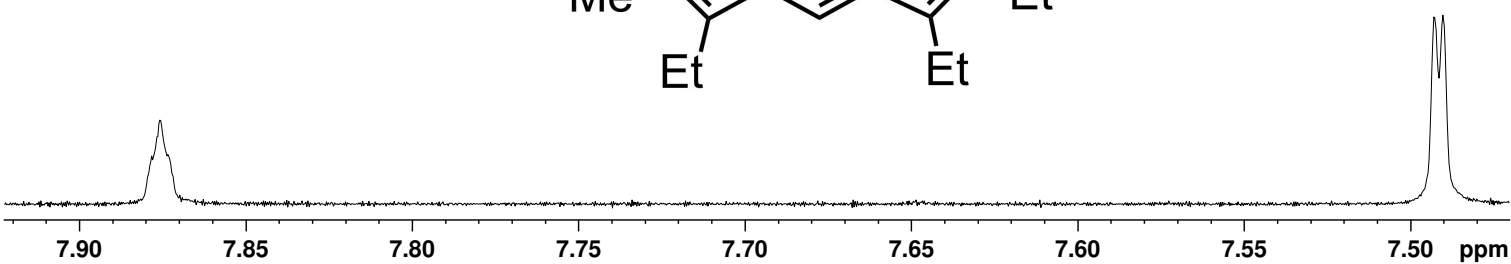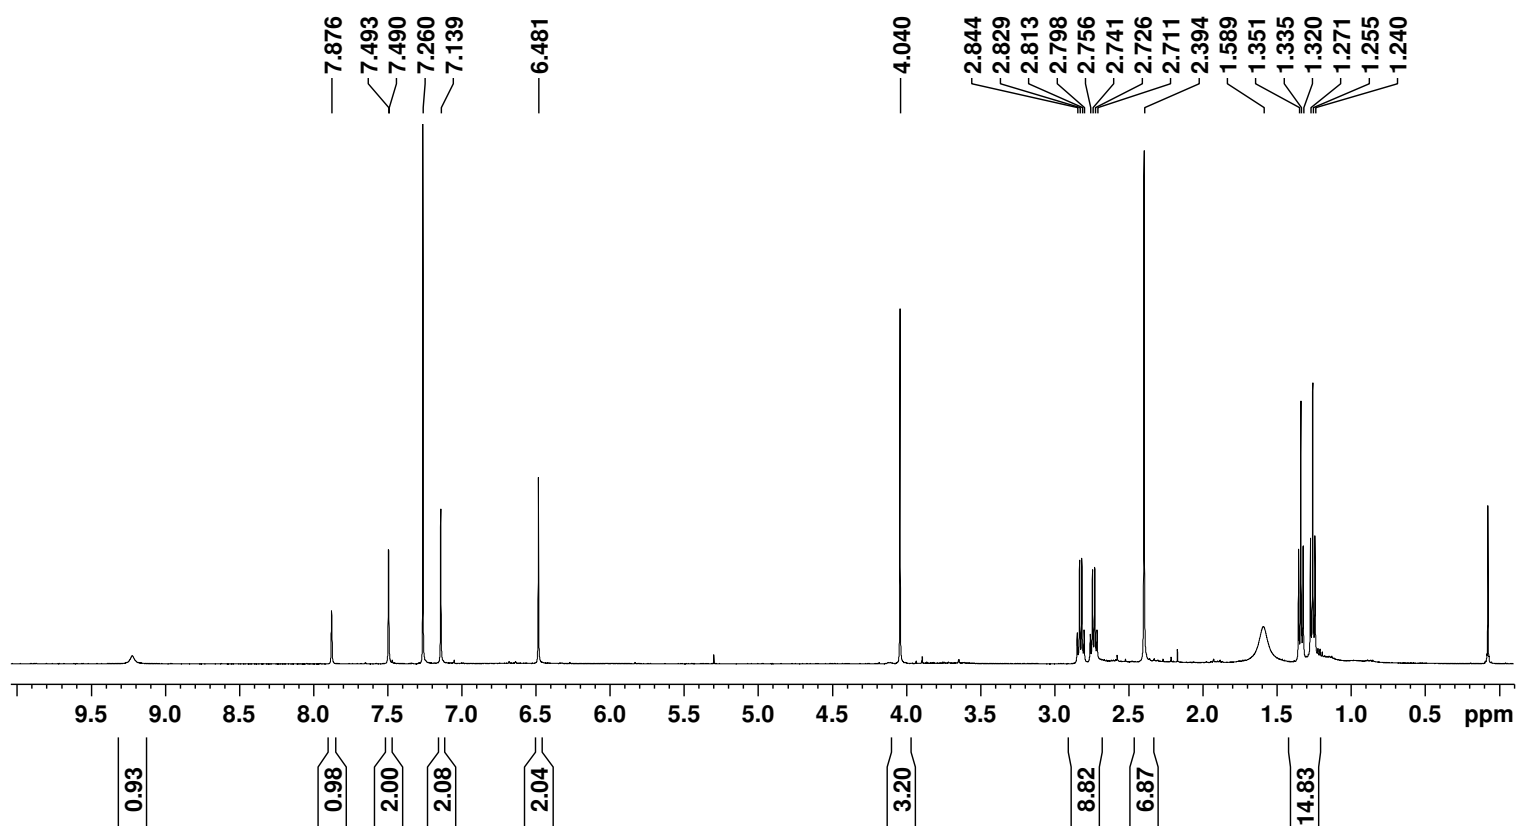

Figure S45. 500 MHz proton NMR spectrum of methoxybenzporphyrin **7a** in CDCl<sub>3</sub>.



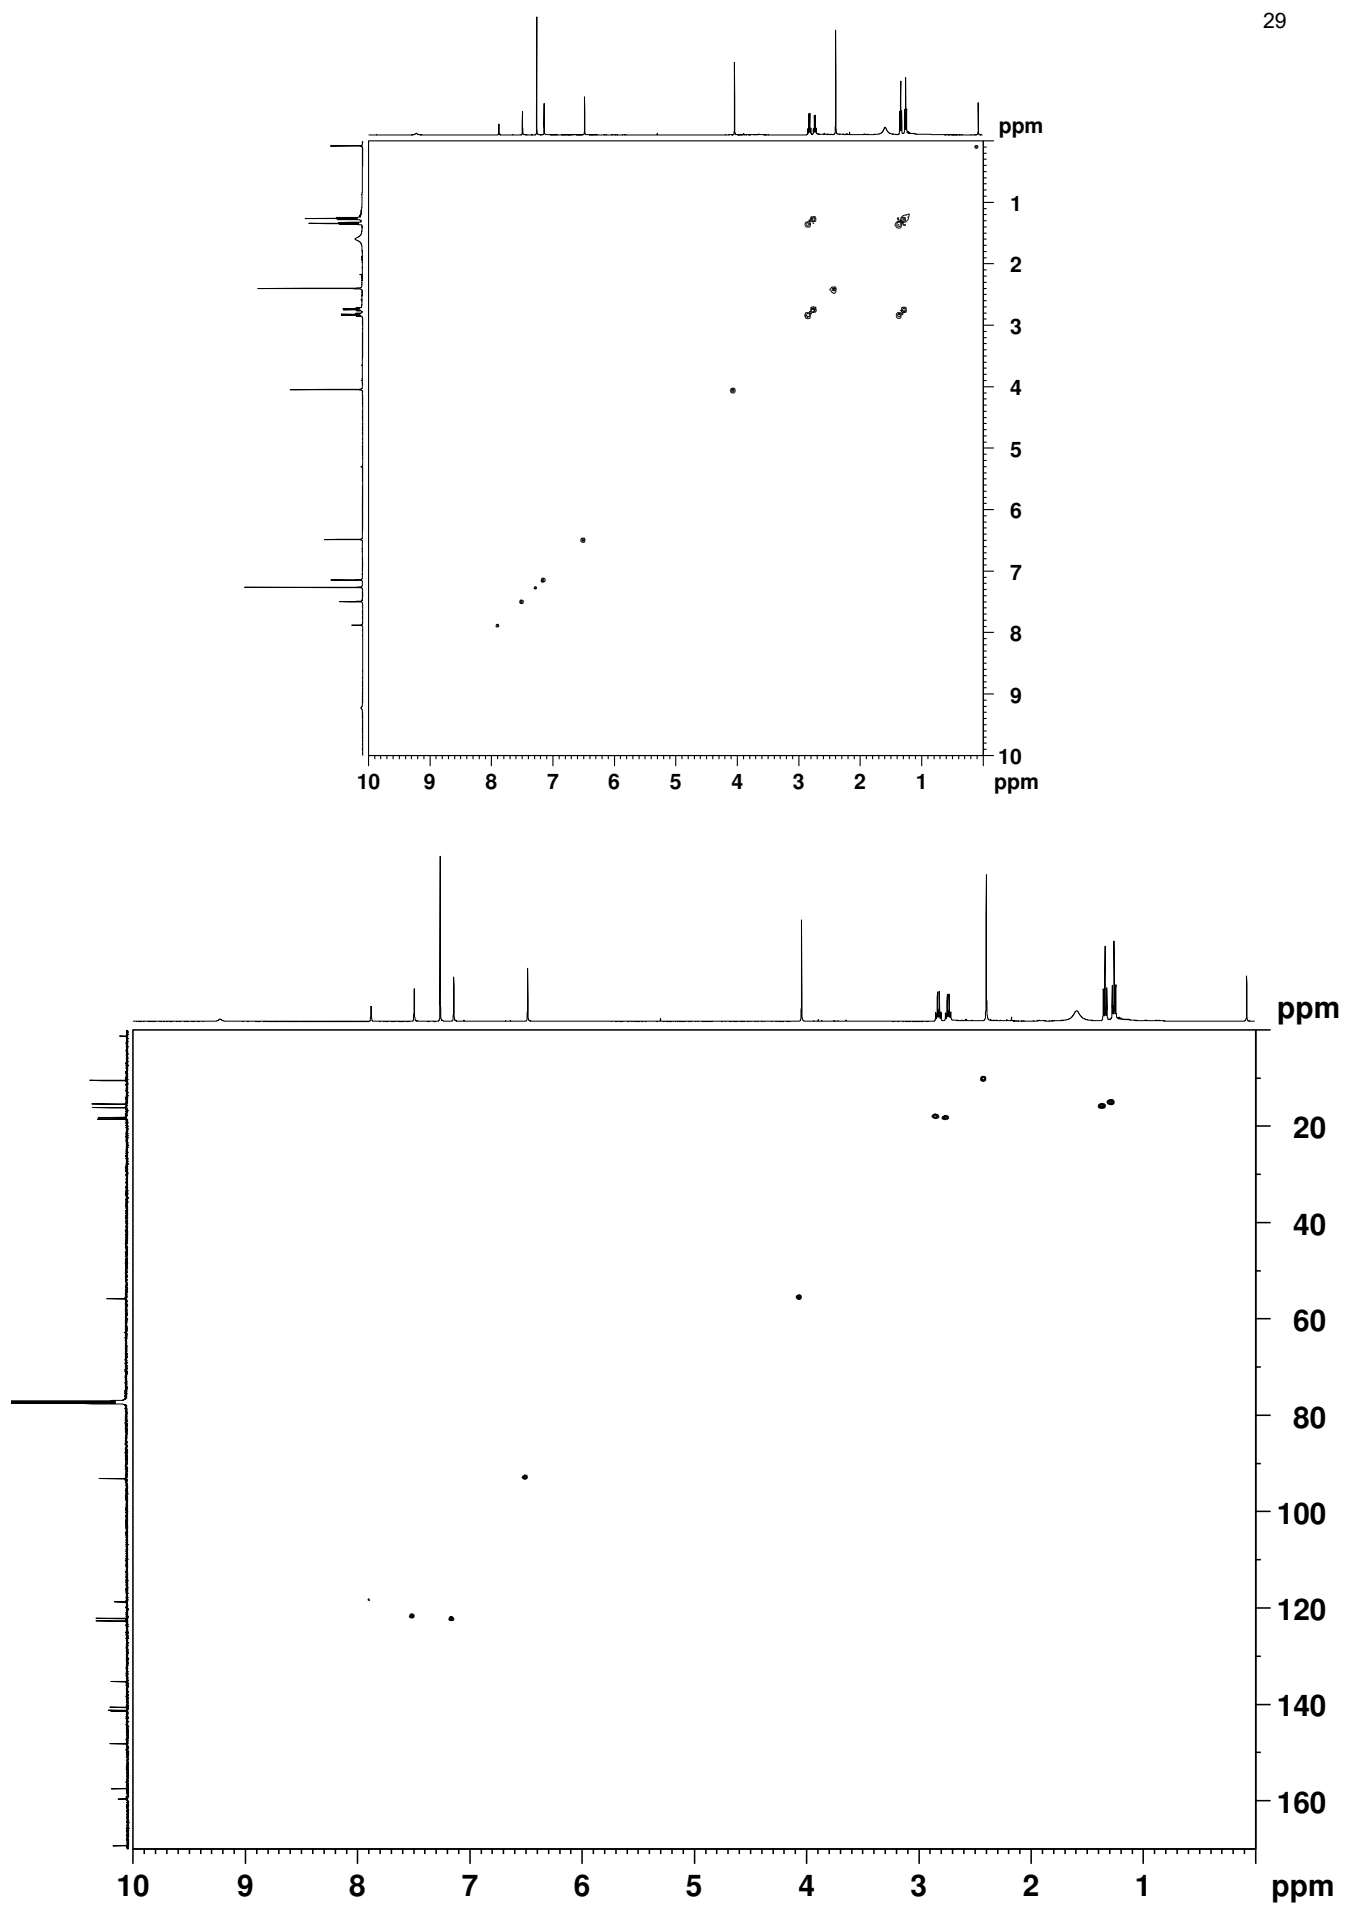

Figure S46.  $^1\text{H}$ - $^1\text{H}$  COSY (top) and HSQC (bottom) NMR spectra of methoxybenziporphyrin **7a** in  $\text{CDCl}_3$ .

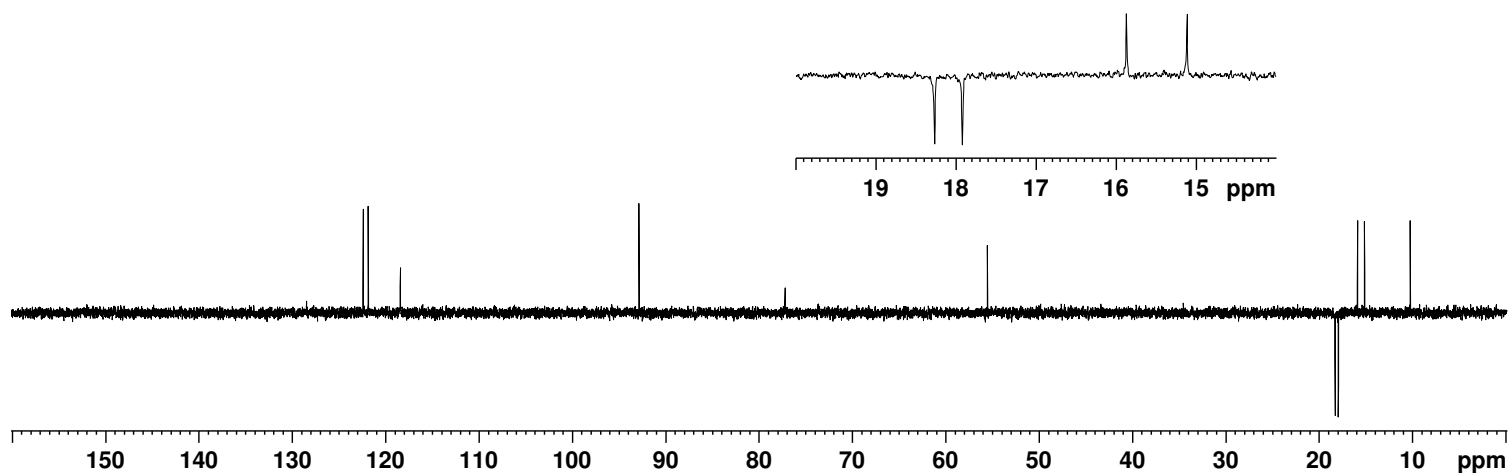

Figure S47. DEPT-135 NMR spectrum of **7a** in  $\text{CDCl}_3$ .

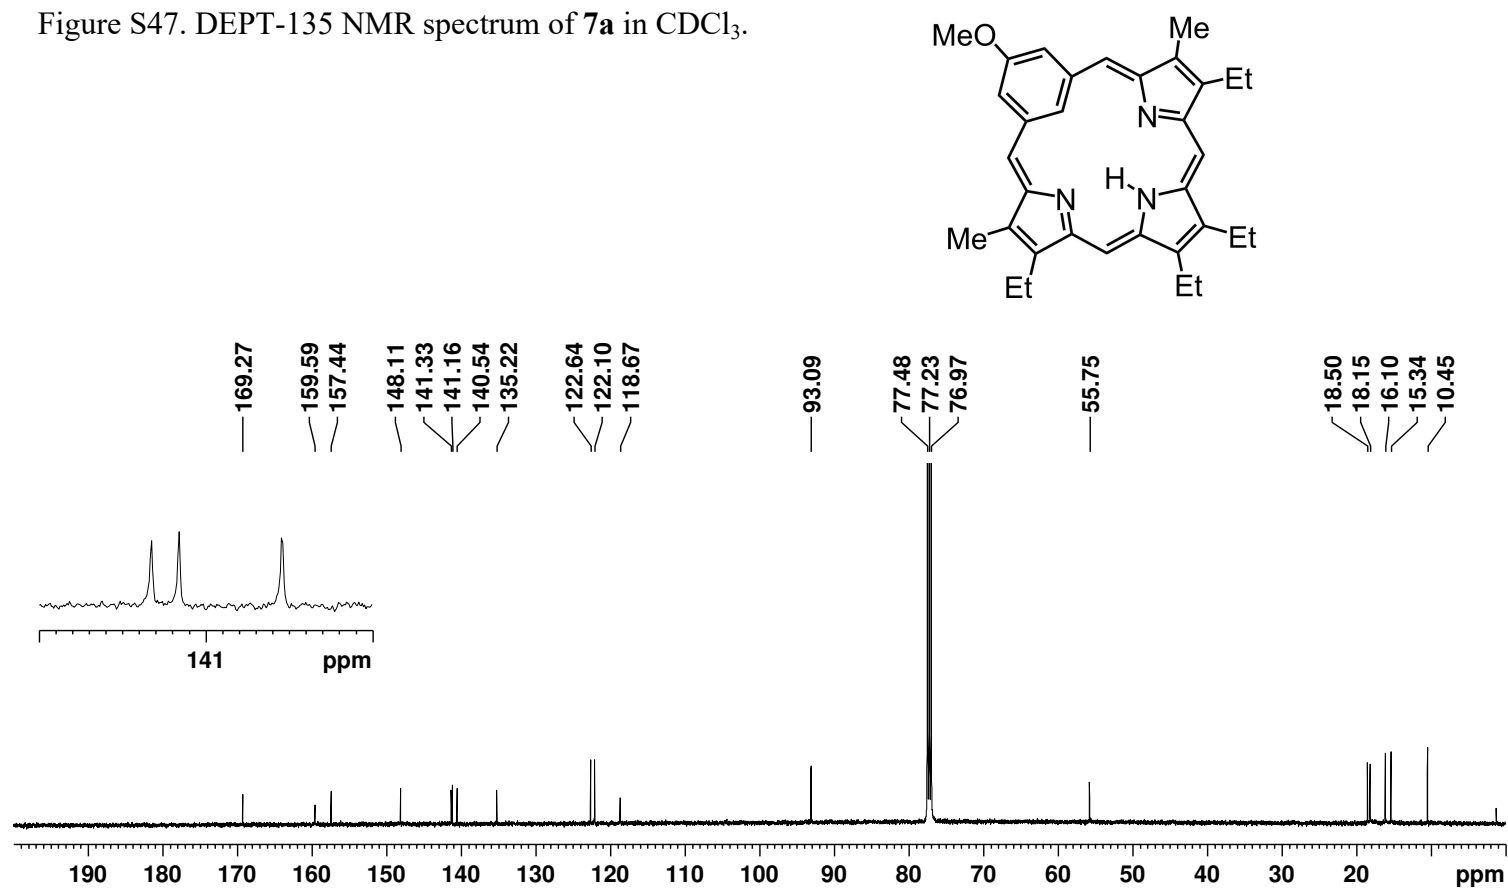

Figure S48. 125 MHz carbon-13 NMR spectrum of methoxybenzporphyrin **7a** in  $\text{CDCl}_3$ .

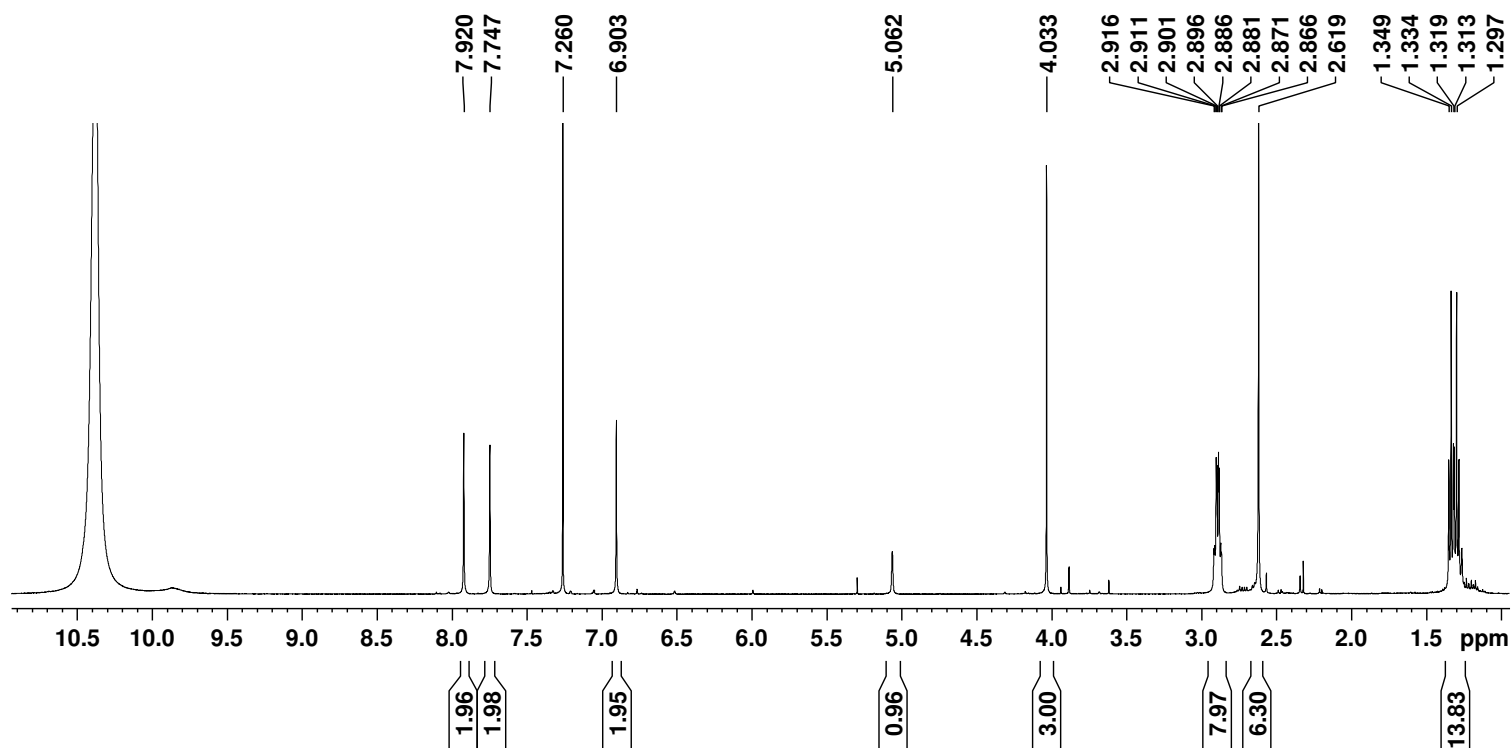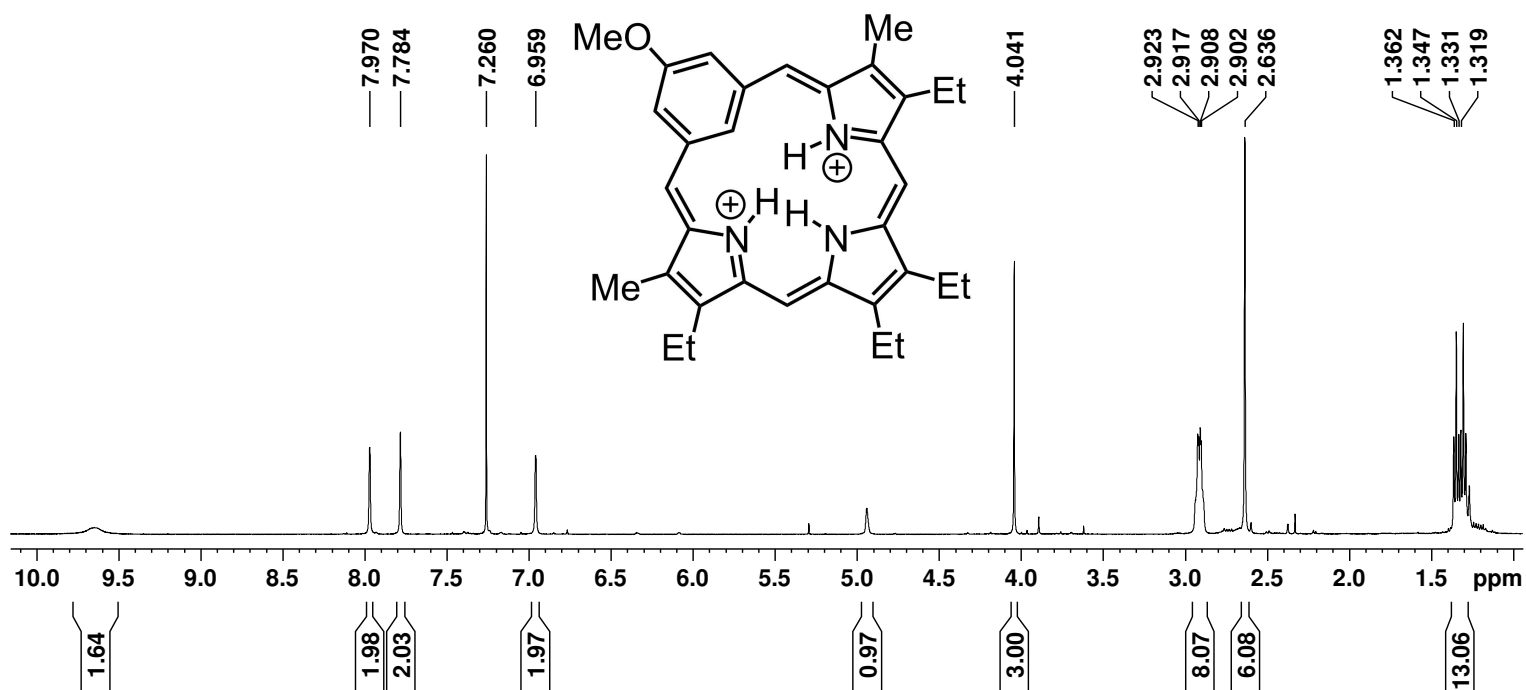

Figure S49. 500 MHz proton NMR spectra of **7a** in the presence of TFA and CDCl<sub>3</sub>. The second spectrum shows the results from adding several additional drops of TFA.

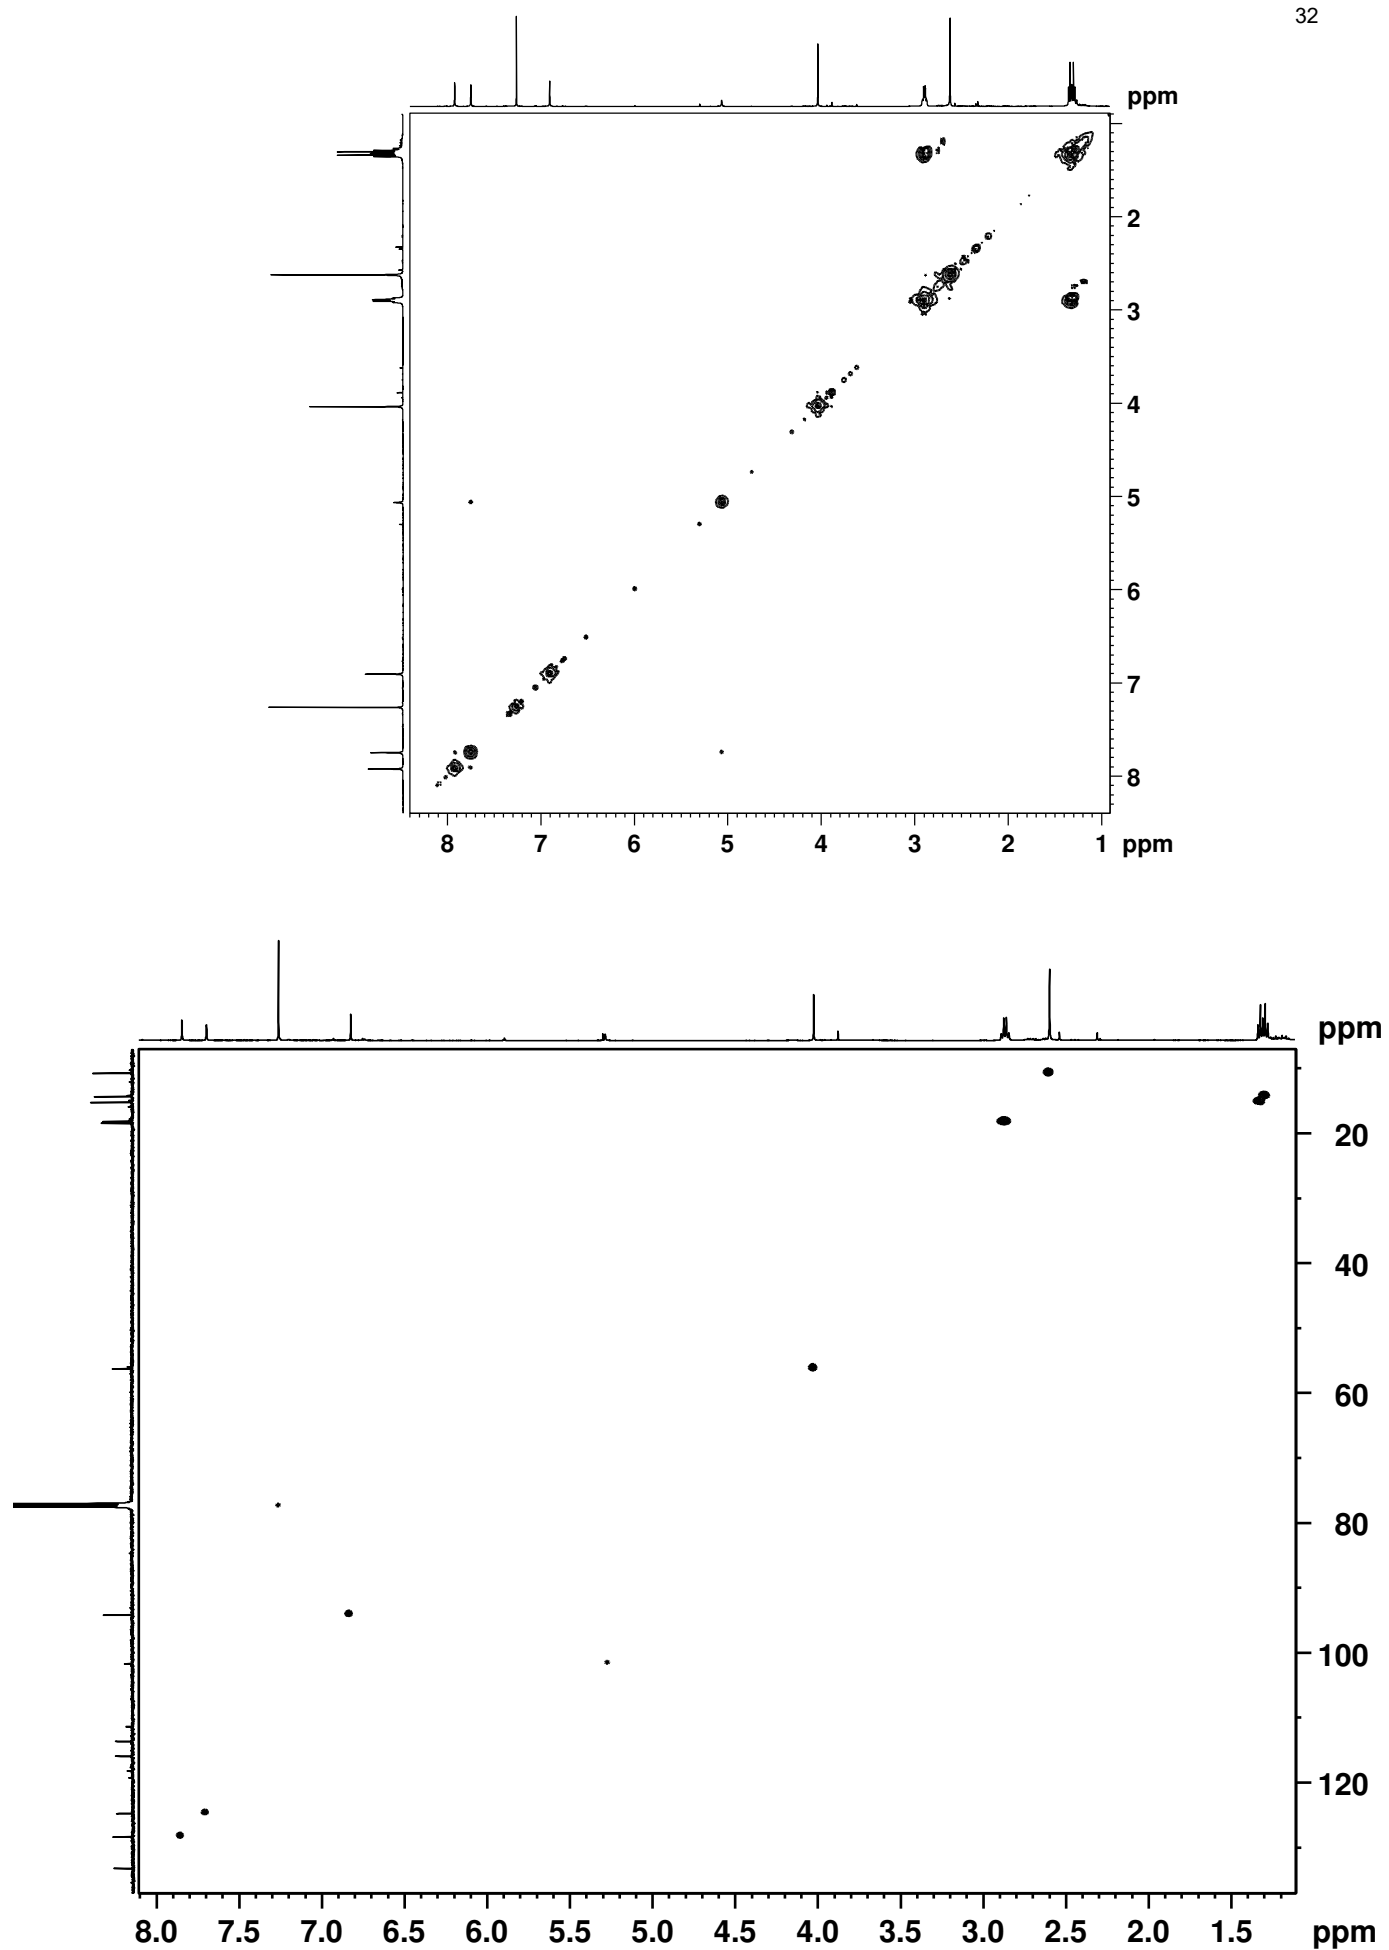

Figure S50.  $^1H$ - $^1H$  COSY (top) and HSQC (bottom) NMR spectra of  $7aH_2^{2+}$  in TFA- $CDCl_3$ .

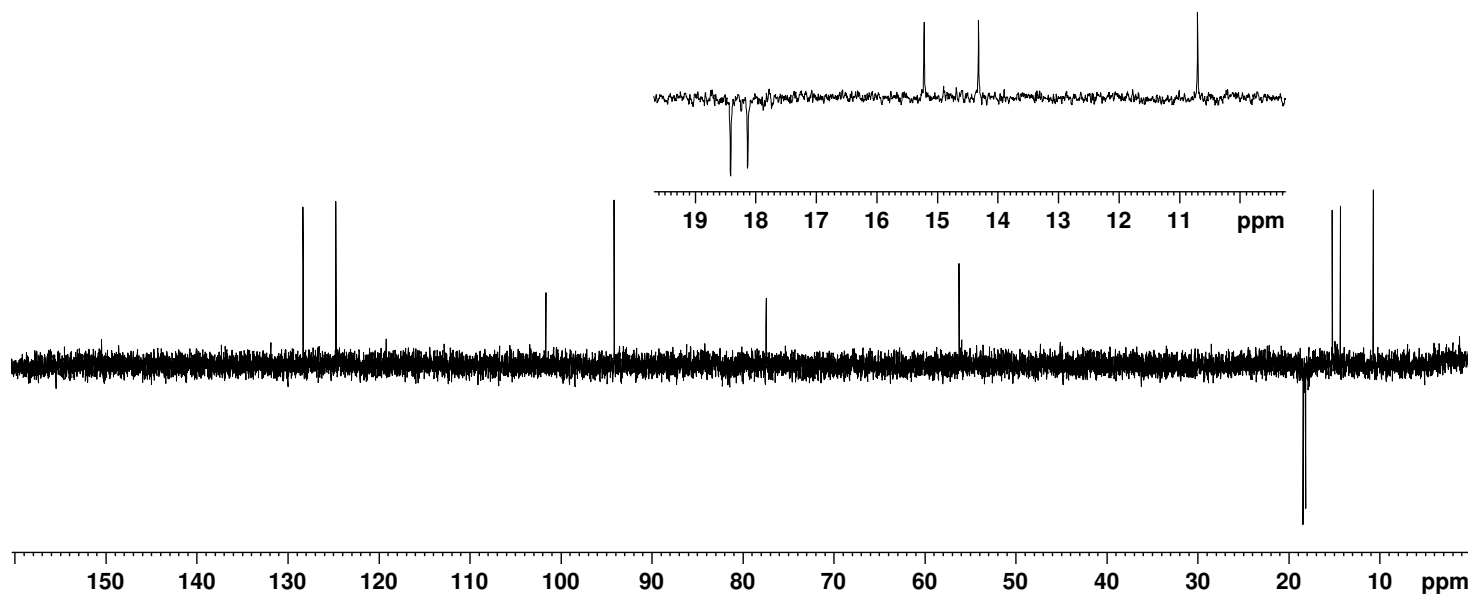

Figure S51. DEPT-135 NMR spectrum of **7aH<sub>2</sub><sup>2+</sup>** in TFA-CDCl<sub>3</sub>.

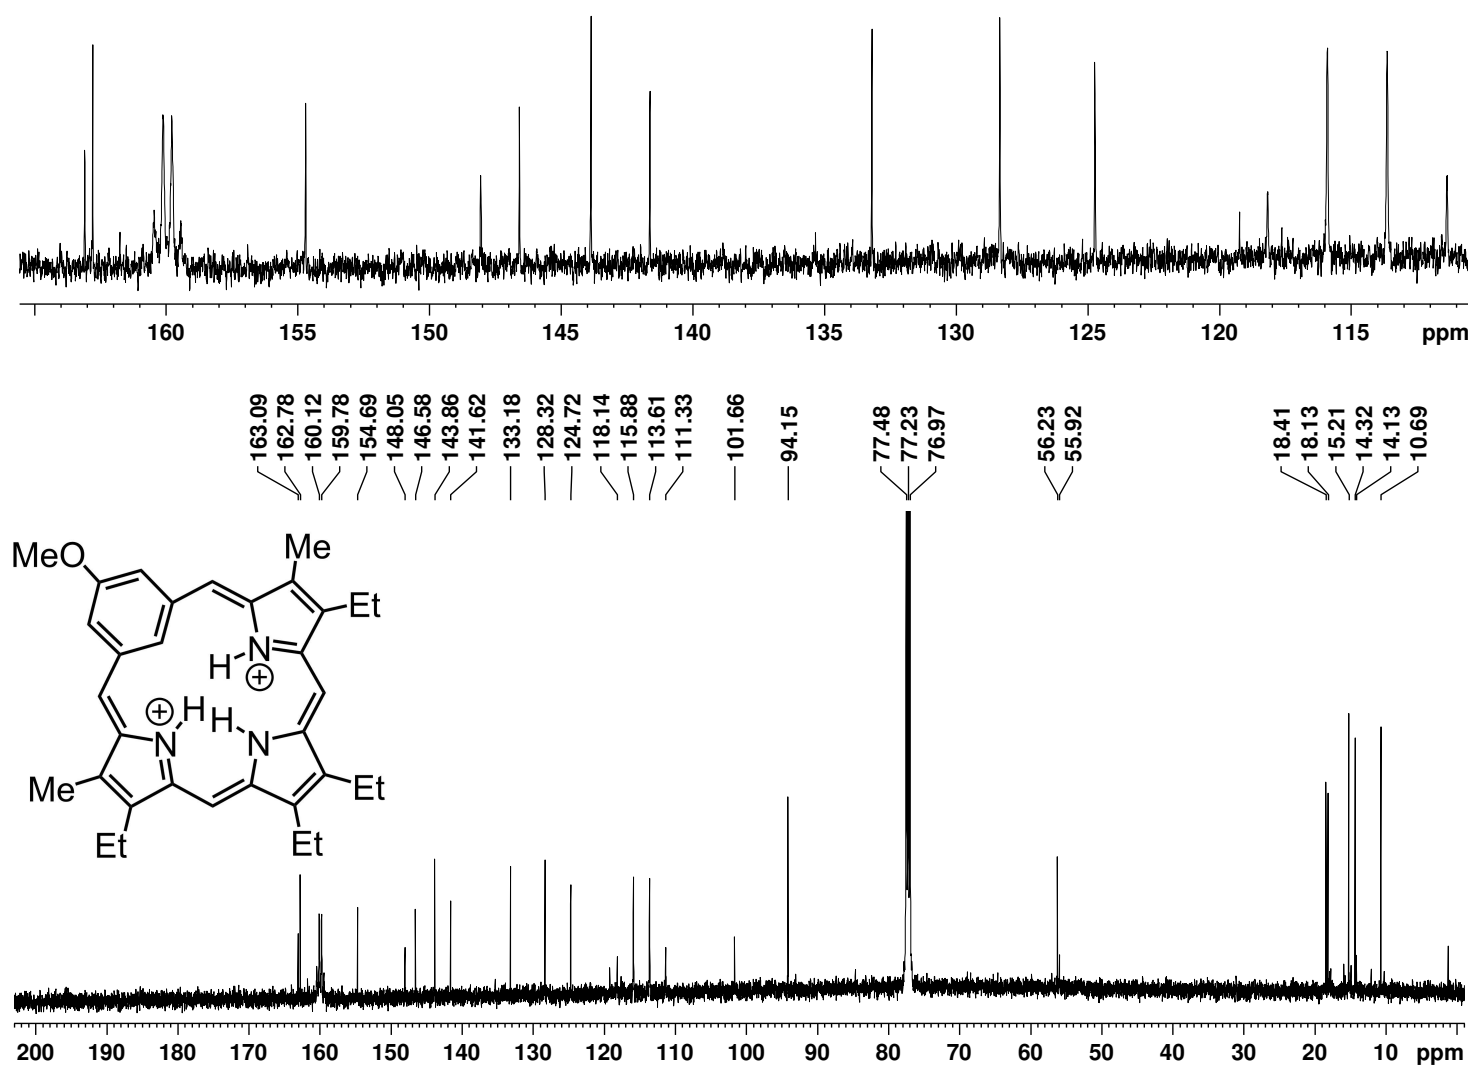

Figure S52. 125 MHz carbon-13 NMR spectrum of **7aH<sub>2</sub><sup>2+</sup>** in TFA-CDCl<sub>3</sub>.

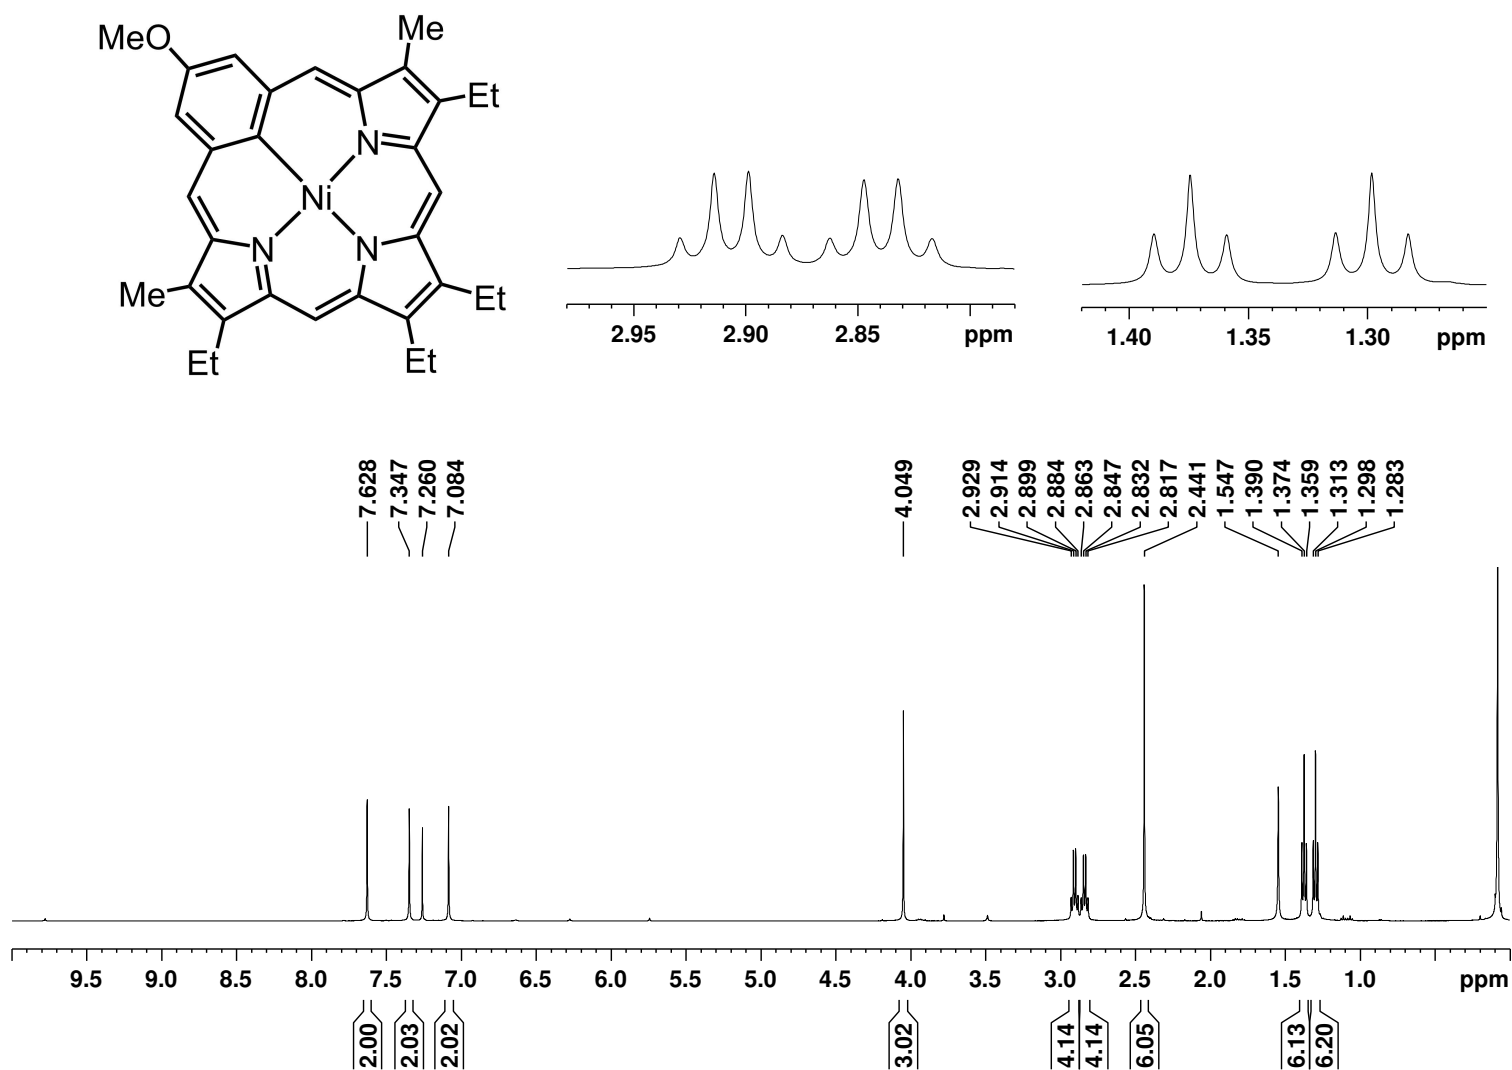

Figure S53, 500 MHz proton NMR spectrum of nickel(II) complex **7aNi** in CDCl<sub>3</sub>.

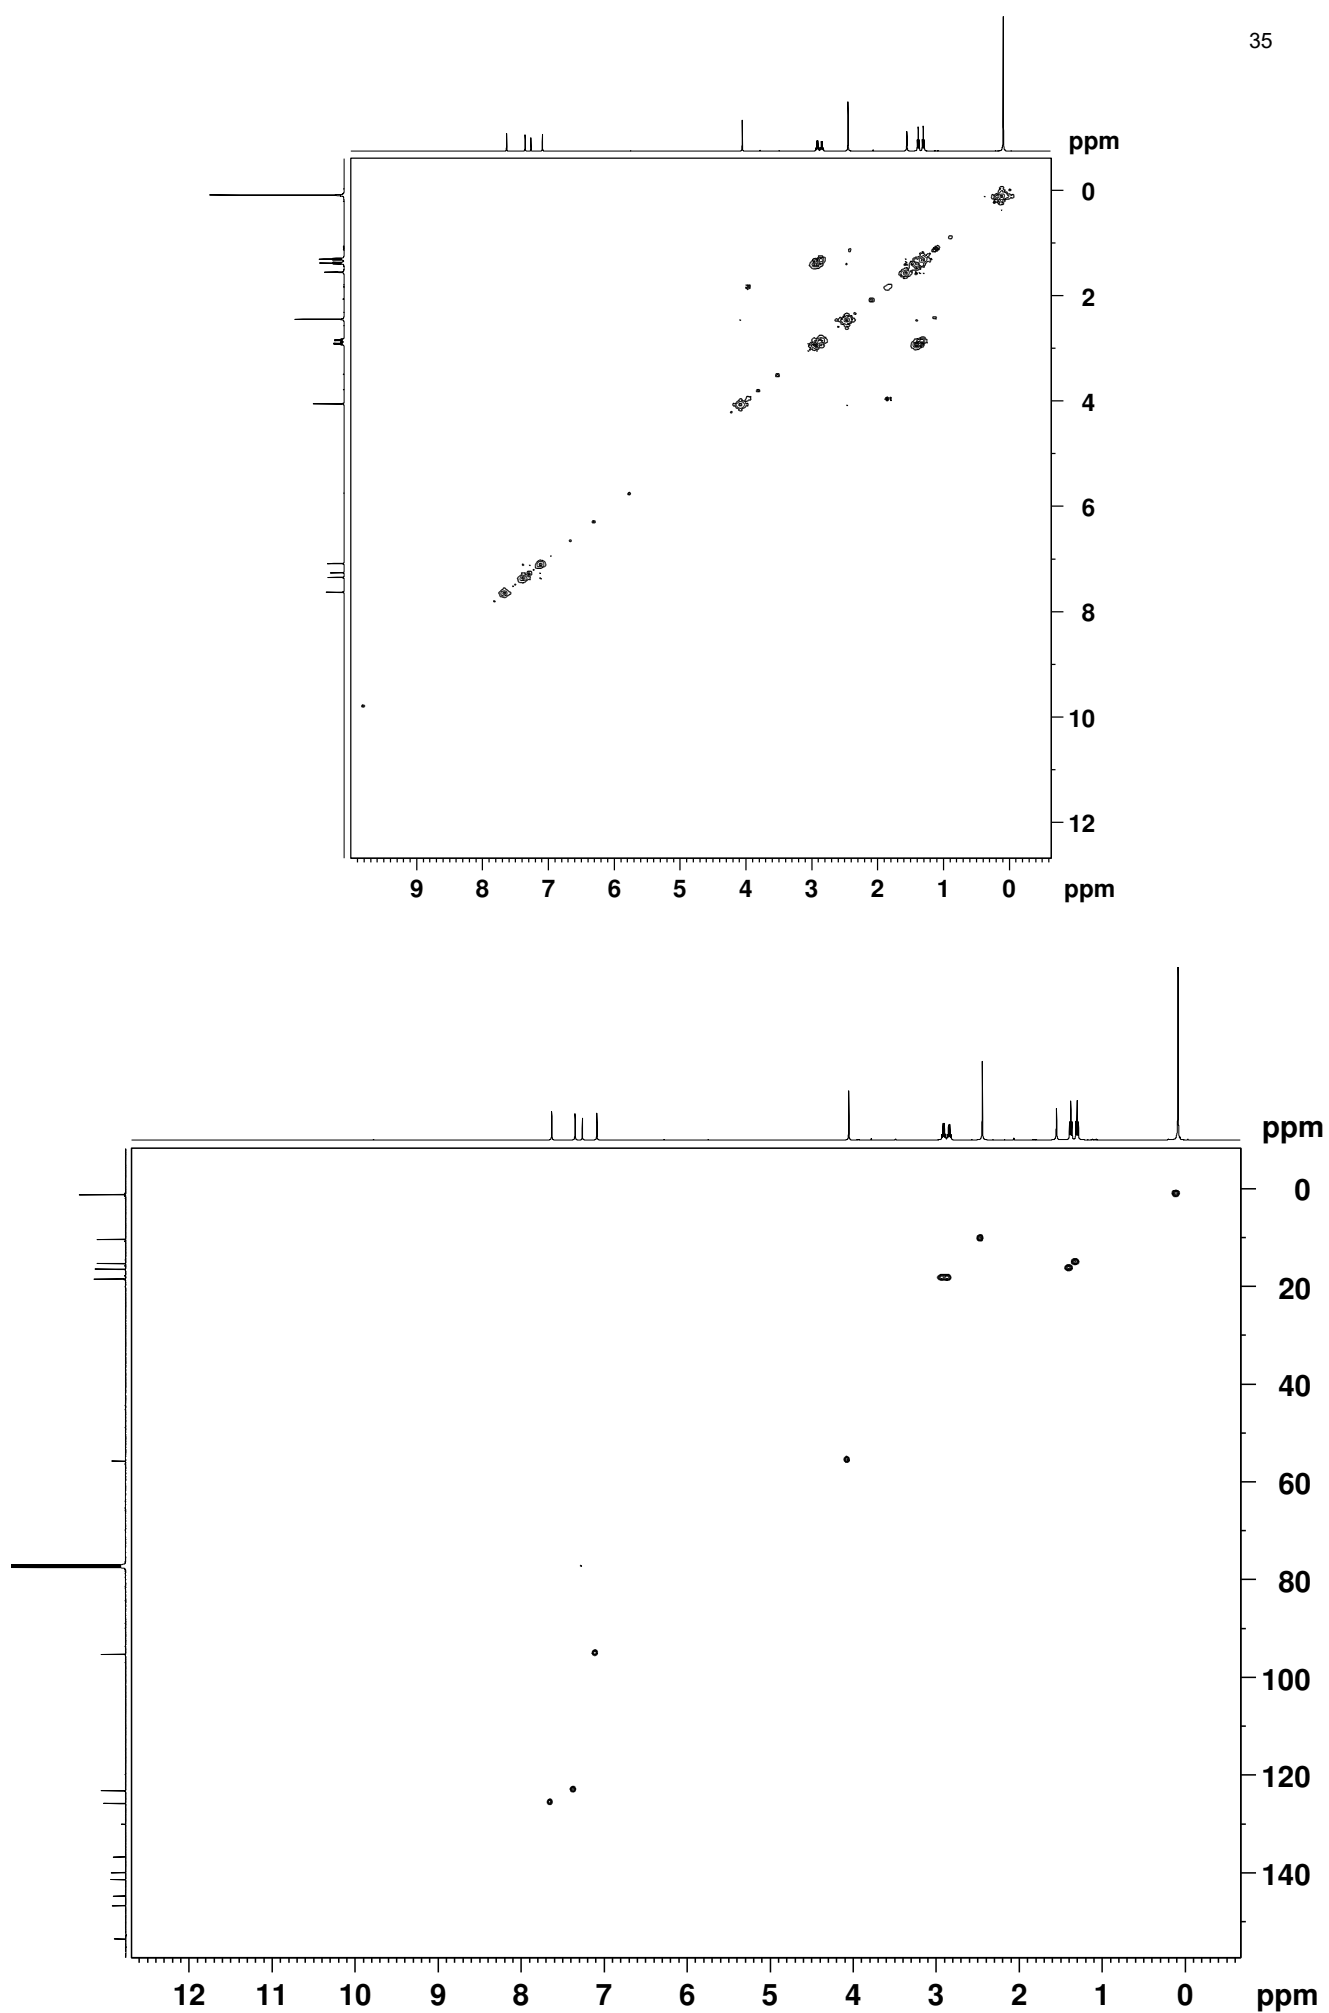

Figure S54.  $^1\text{H}$ - $^1\text{H}$  COSY (top) and HSQC (bottom) NMR spectra of **7aNi** in  $\text{CDCl}_3$ .

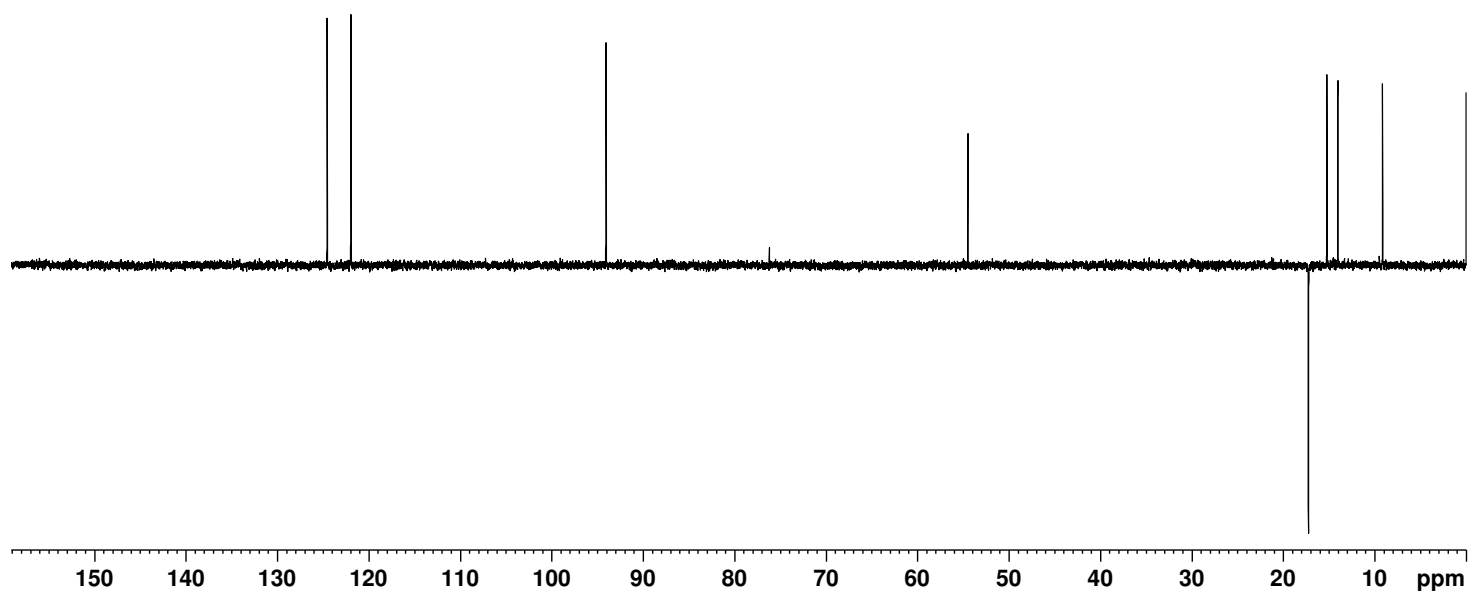

Figure S55. DEPT-135 NMR spectrum of **7aNi** in  $\text{CDCl}_3$ .

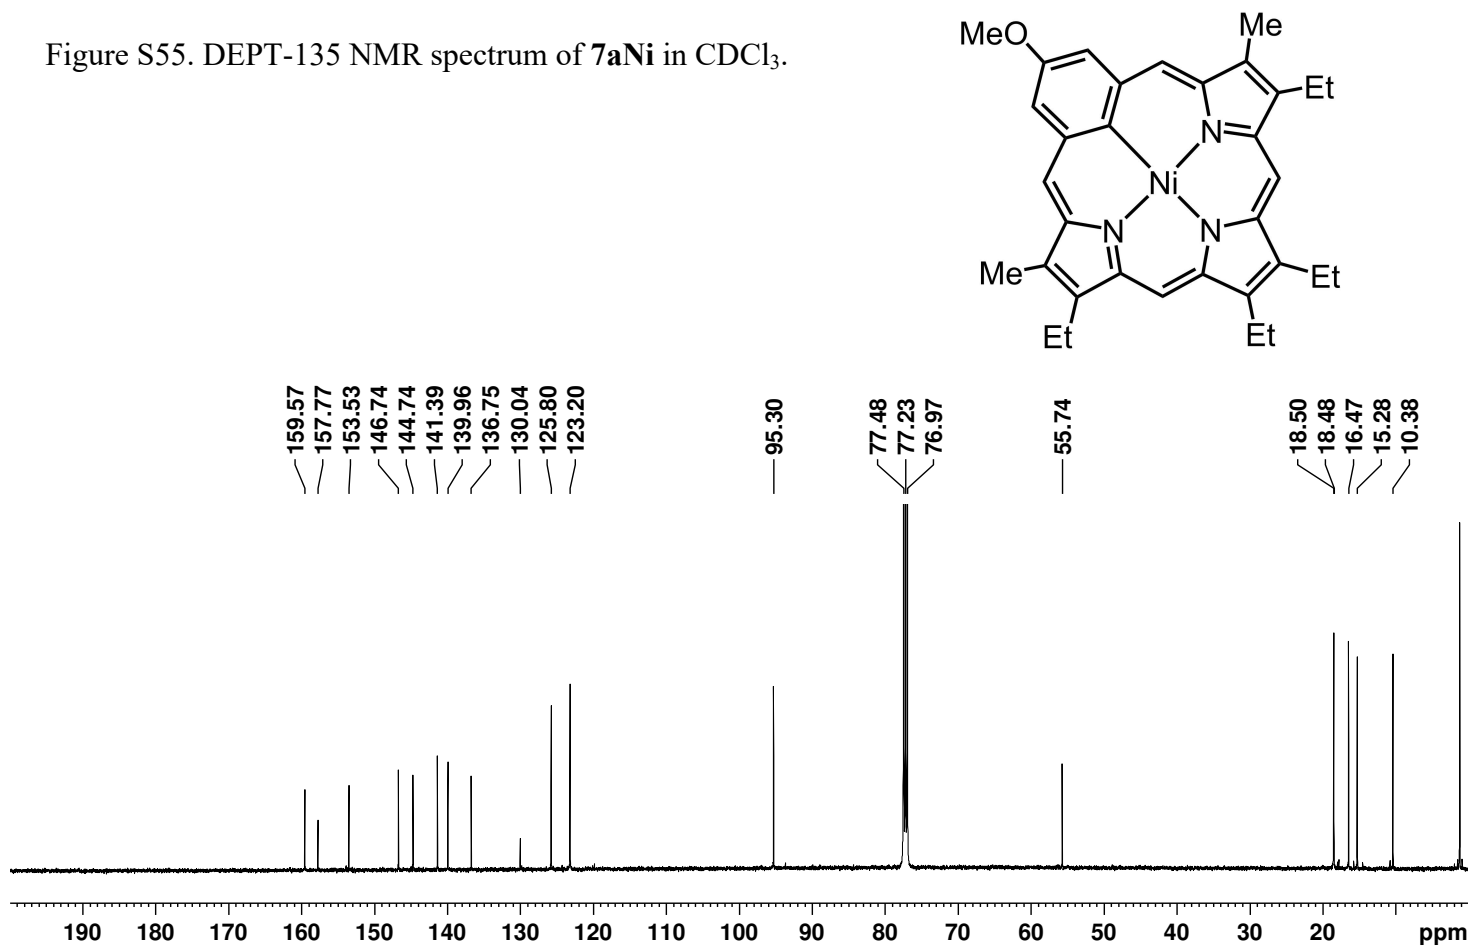

Figure S56. 125 MHz carbon-13 NMR spectrum of **7aNi** in  $\text{CDCl}_3$ .



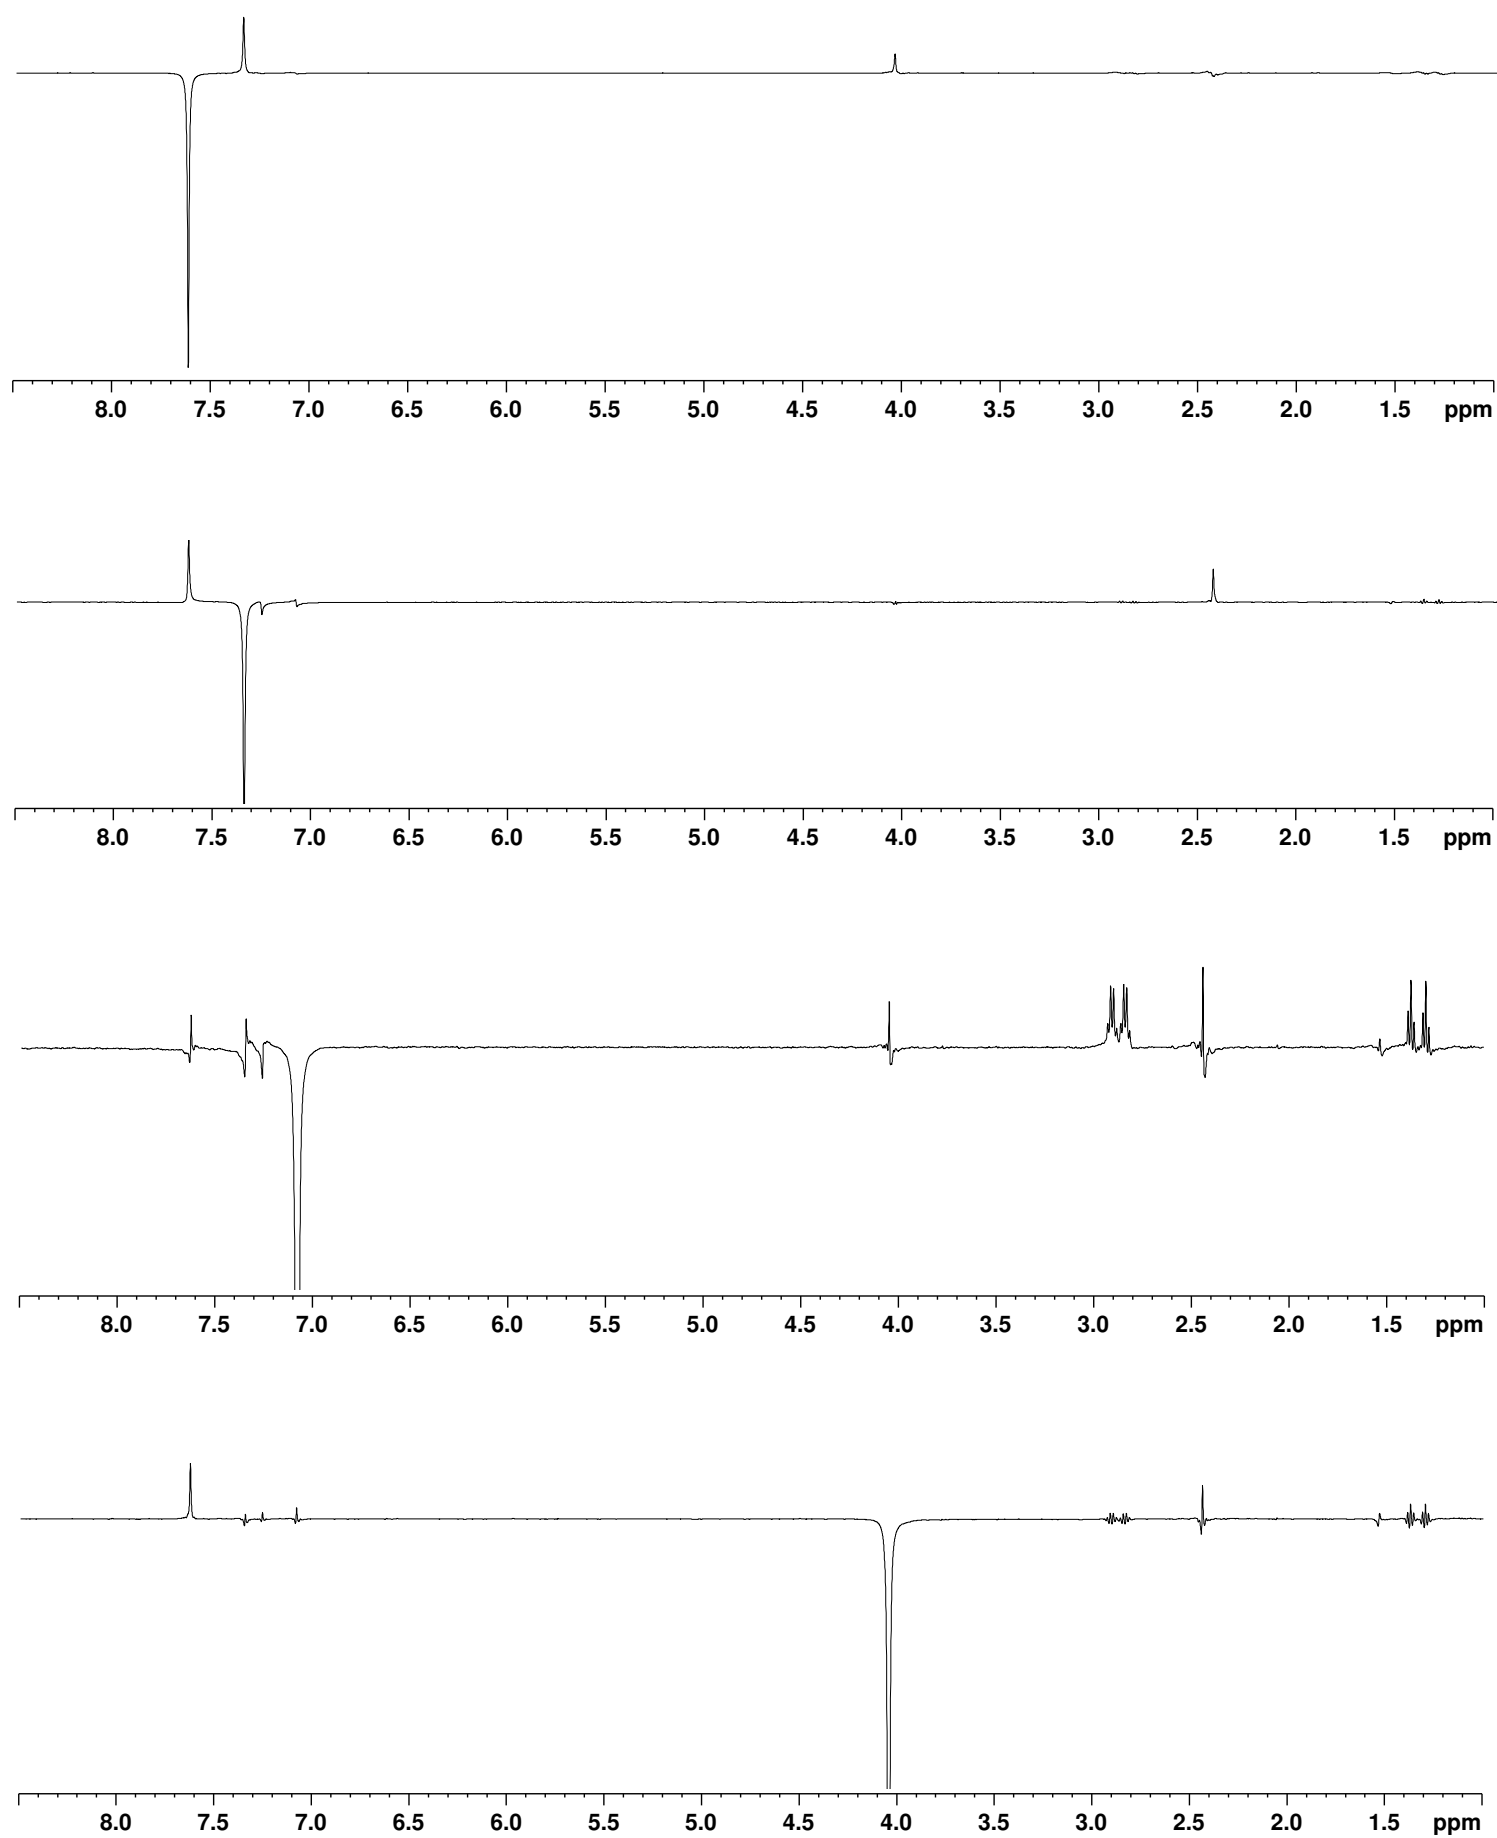

Figure S57. Selected nOe difference proton NMR spectra of **7aNi** in  $\text{CDCl}_3$ .

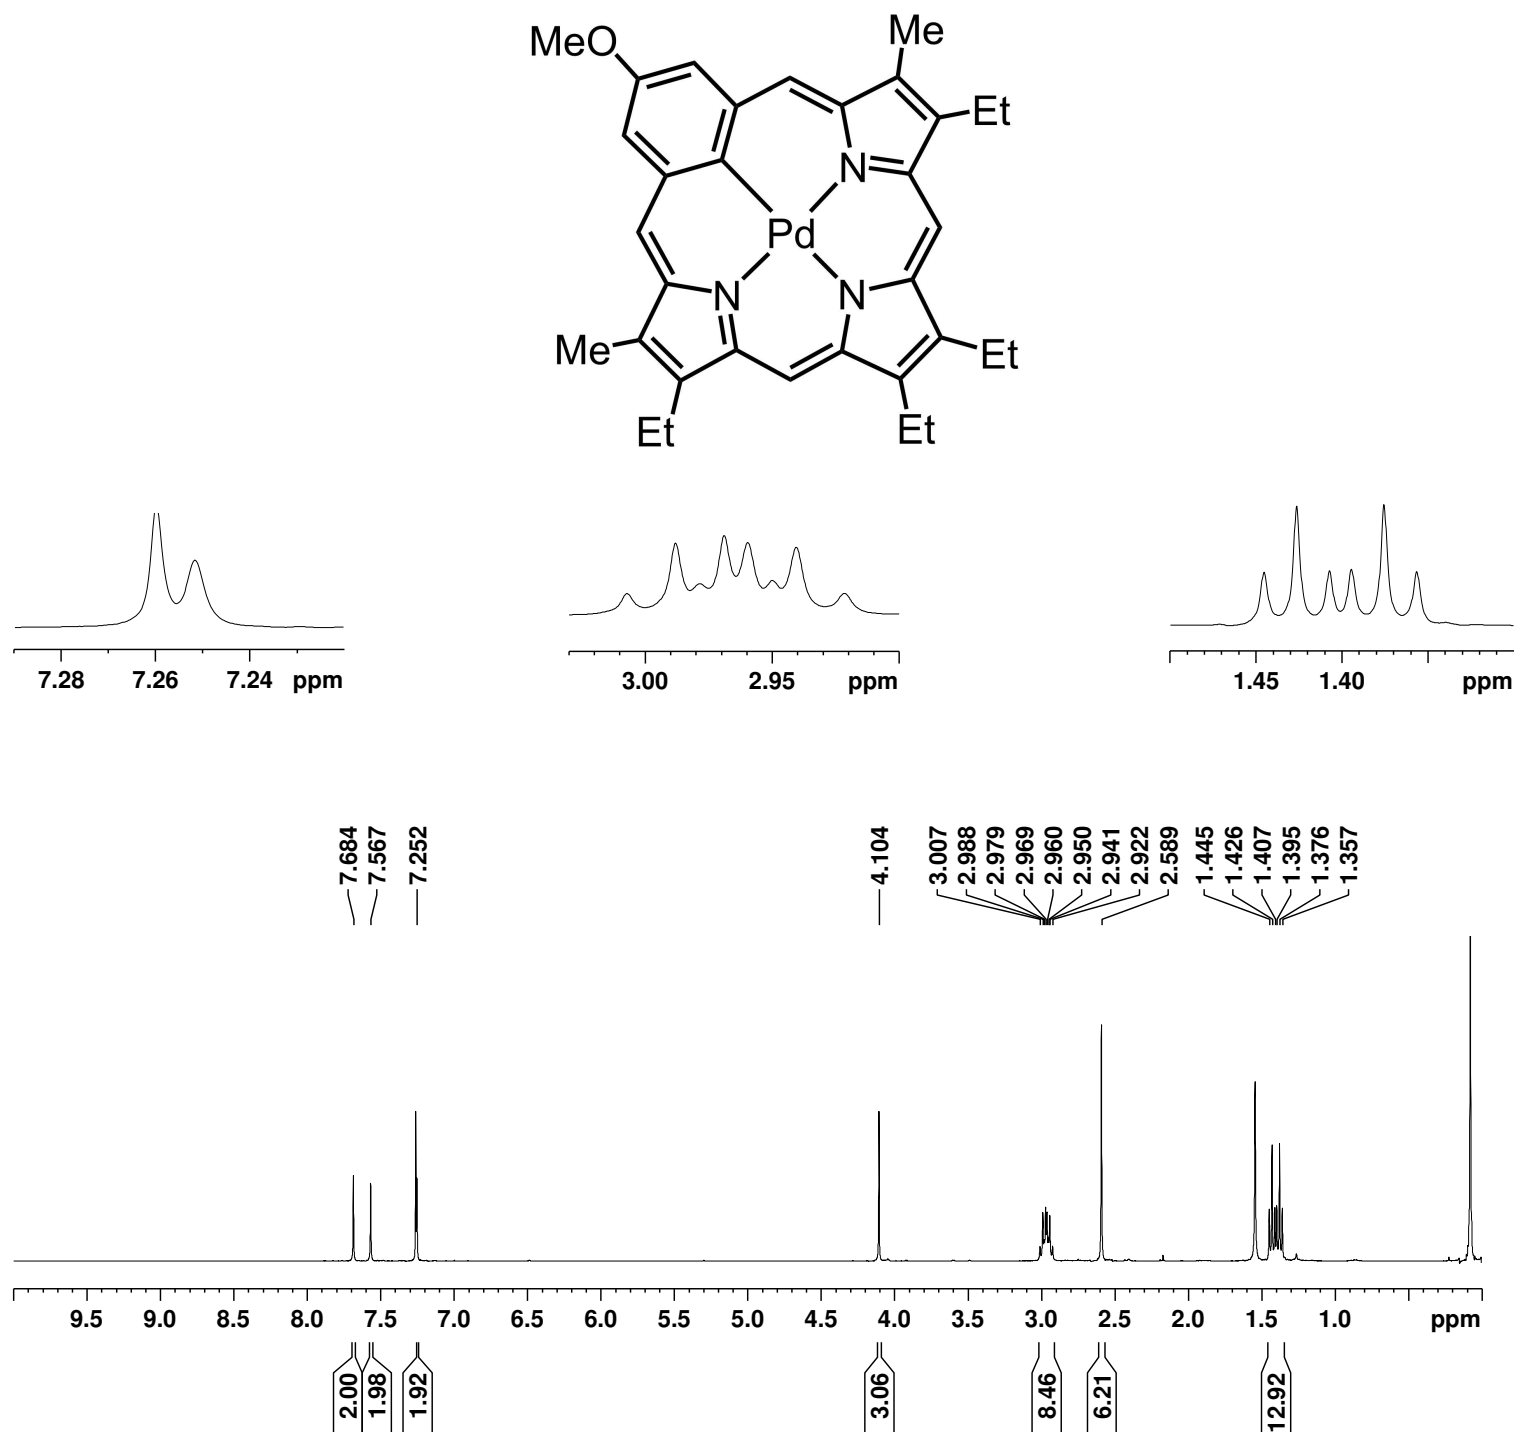

Figure S58. 500 MHz proton NMR spectrum of palladium(II) complex **7aPd** in CDCl<sub>3</sub>.

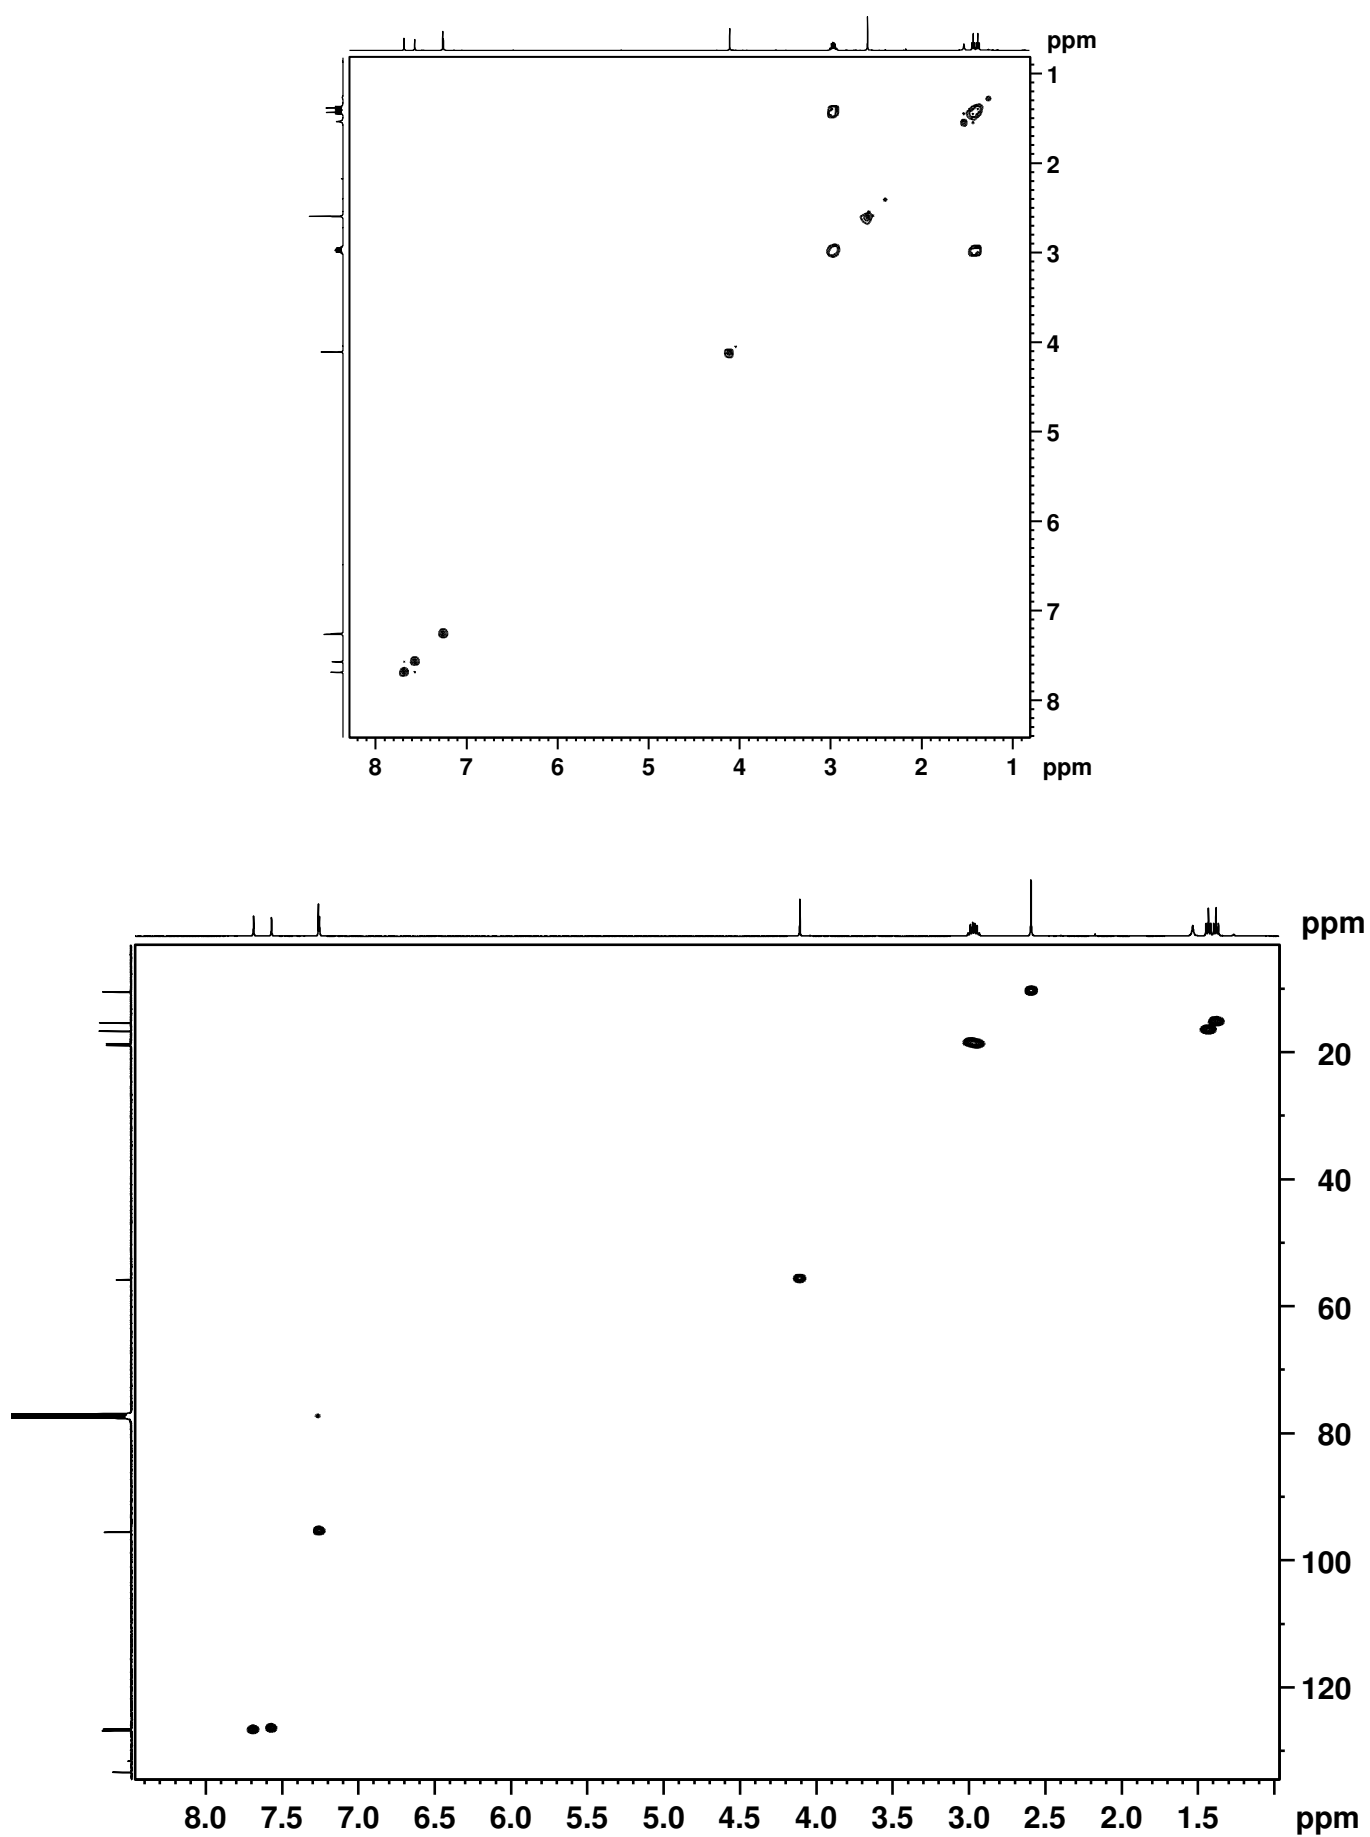

Figure S59.  $^1\text{H}$ - $^1\text{H}$  COSY (top) and HSQC (bottom) NMR spectra of **7aPd** in  $\text{CDCl}_3$ .

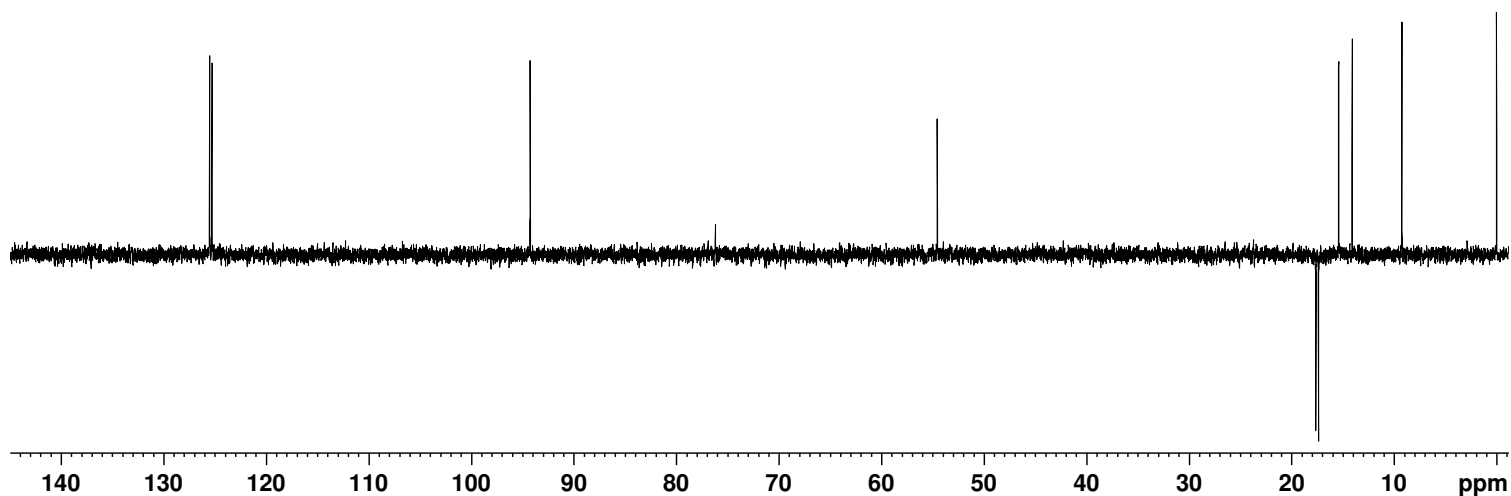

Figure S60. DEPT-135 NMR spectrum of **7aPd** in  $\text{CDCl}_3$ .

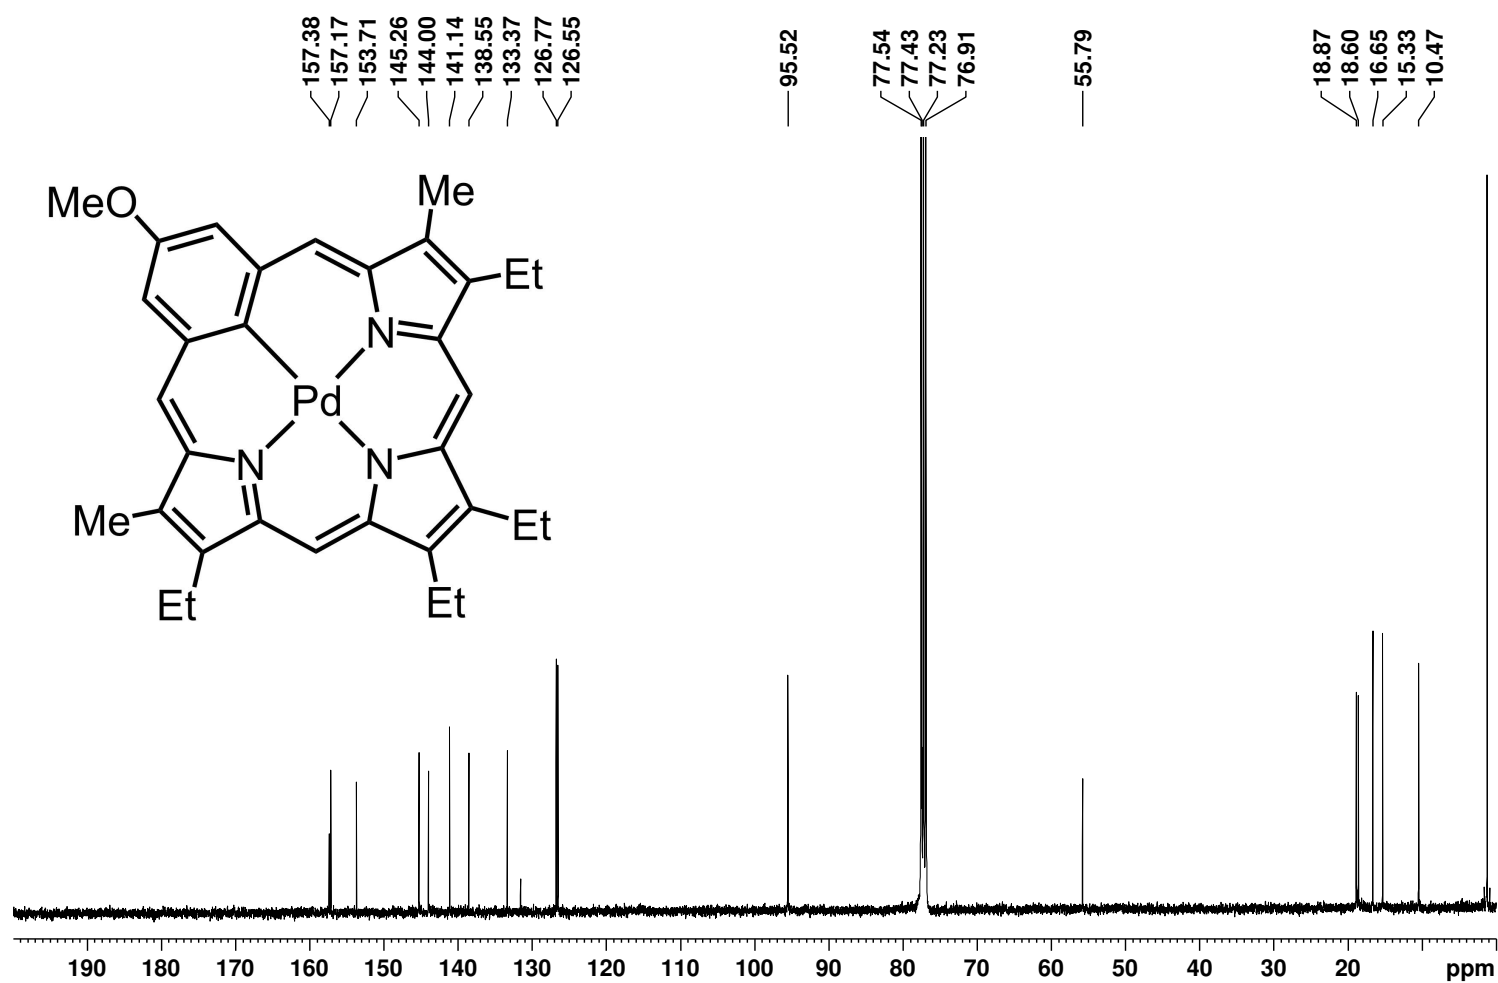

Figure S61. 125 MHz carbon-13 NMR spectrum of **7aPd** in  $\text{CDCl}_3$ .

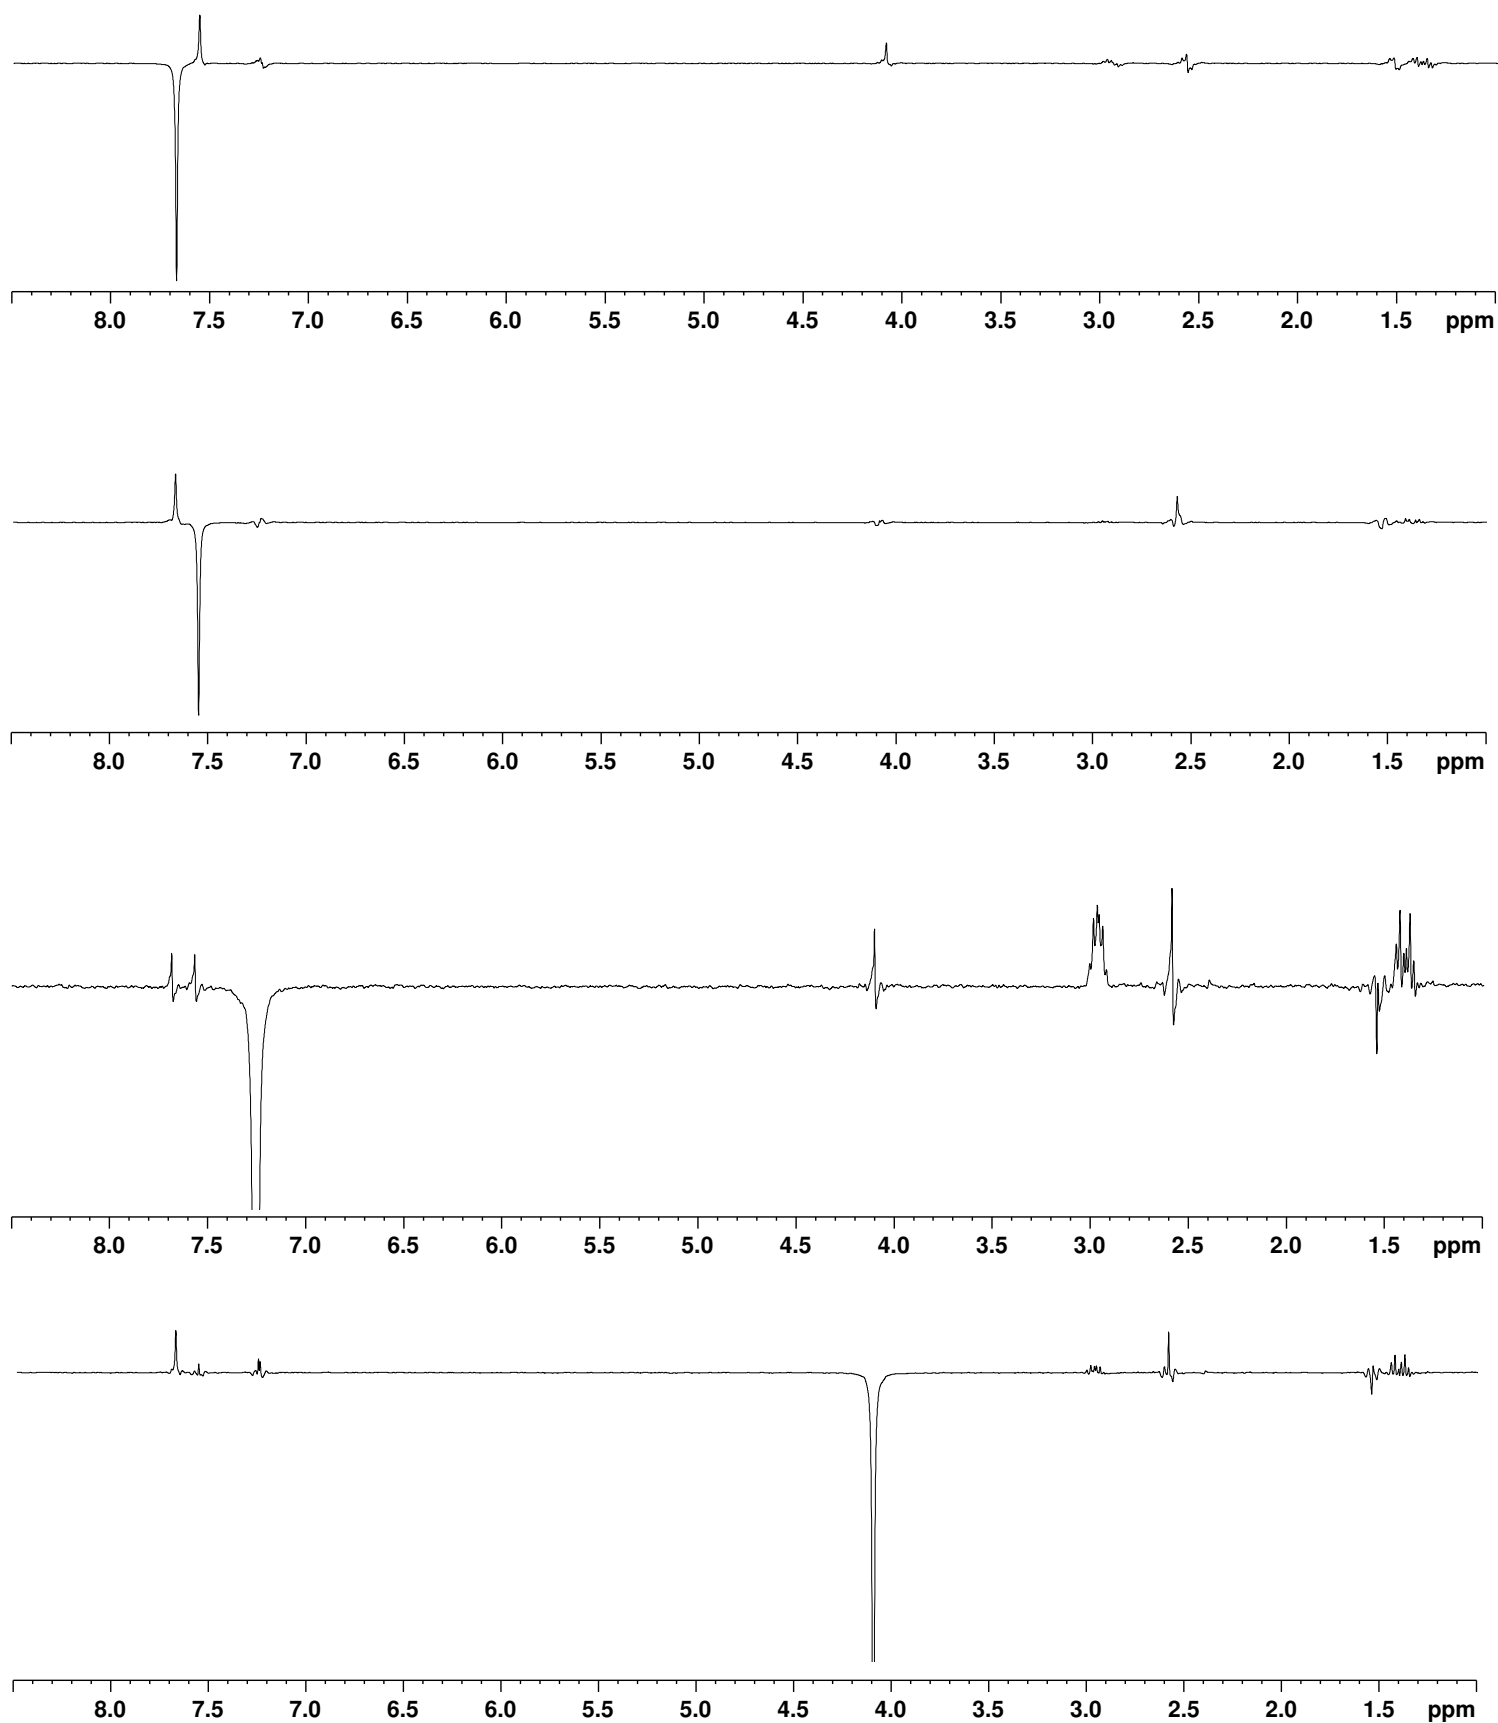

Figure S62. Selected nOe difference proton NMR spectra of **7aPd** in  $\text{CDCl}_3$ .

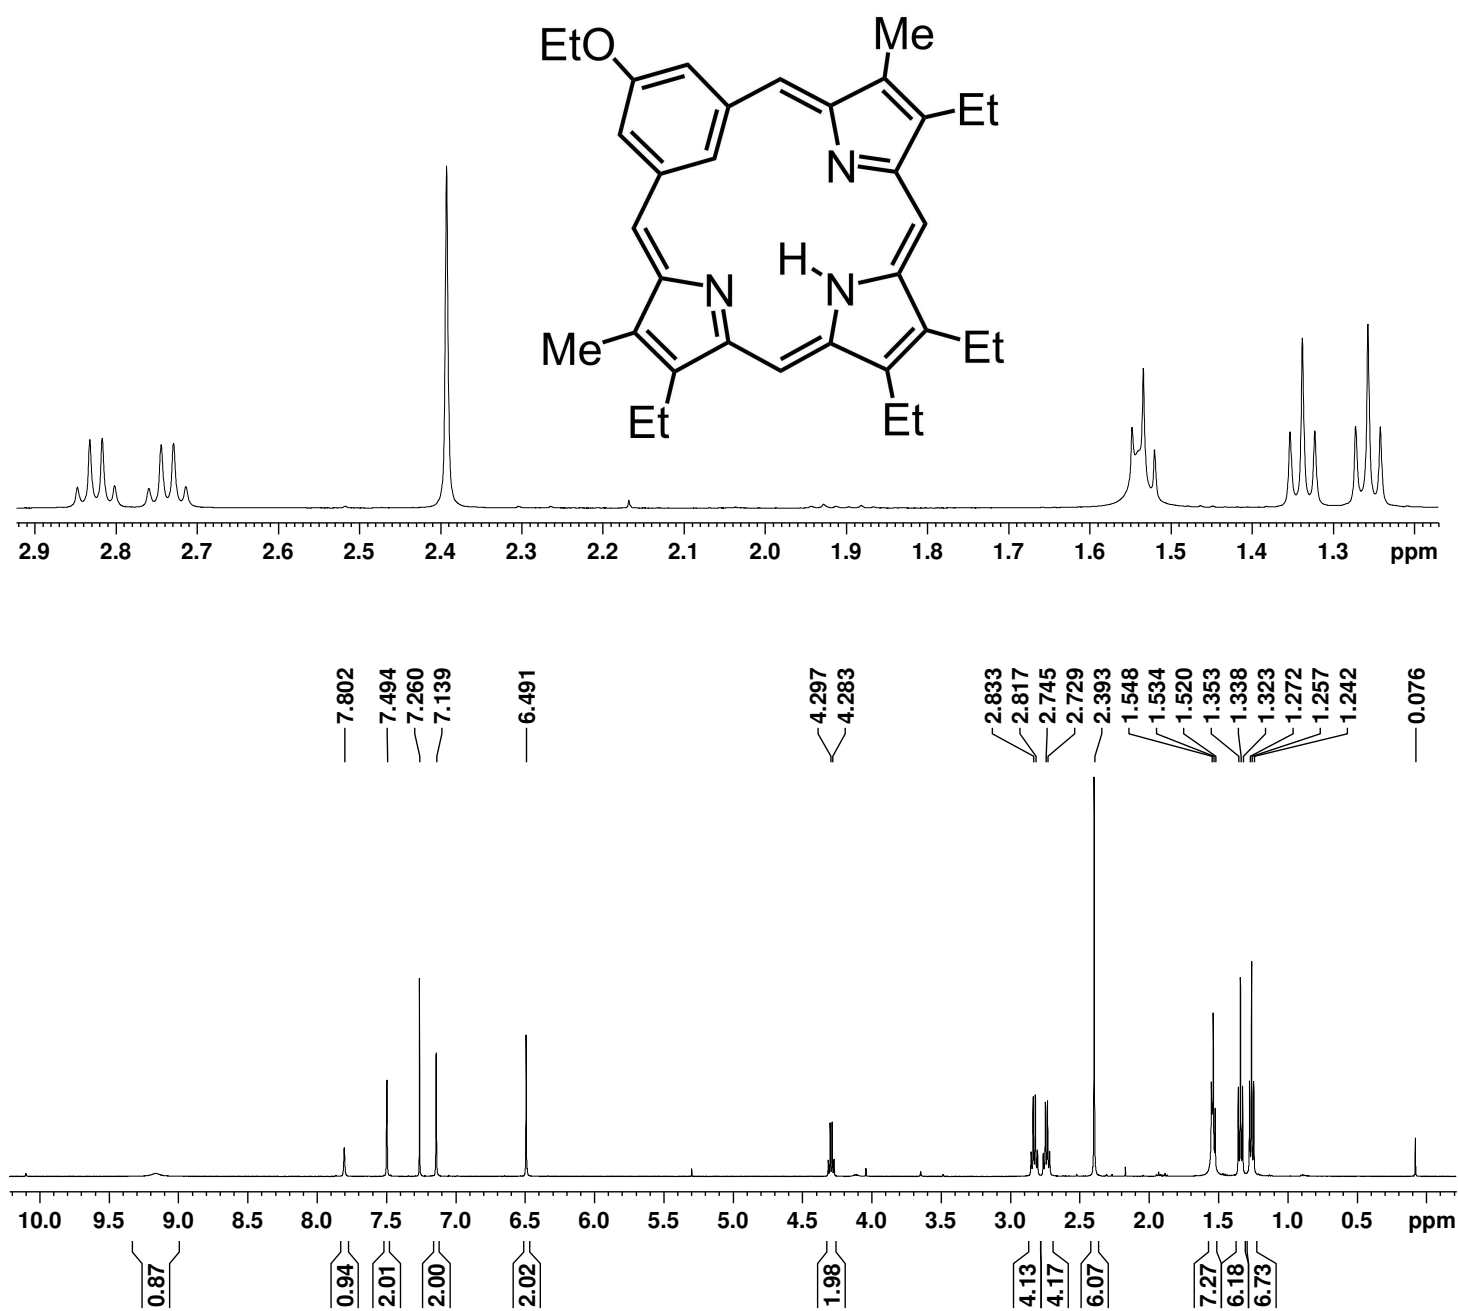

Figure 63. 500 MHz proton NMR spectrum of ethoxybenziporphyrin **7b** in CDCl<sub>3</sub>.

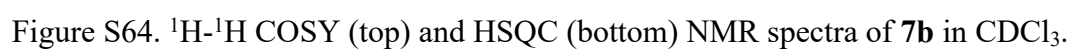

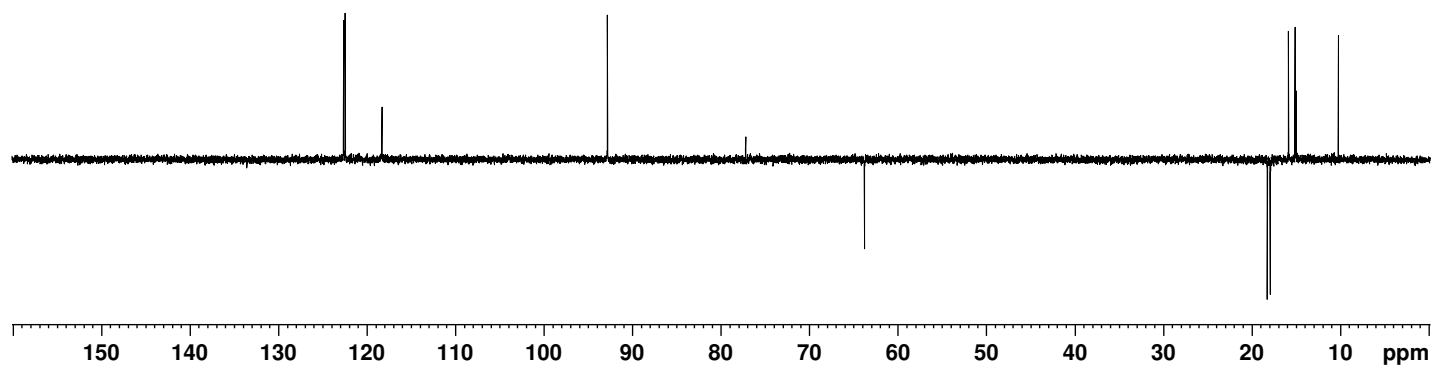

Figure S65. DEPT-135 NMR spectrum of **7b** in  $\text{CDCl}_3$ .

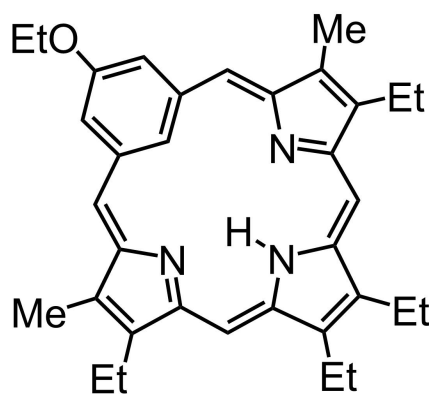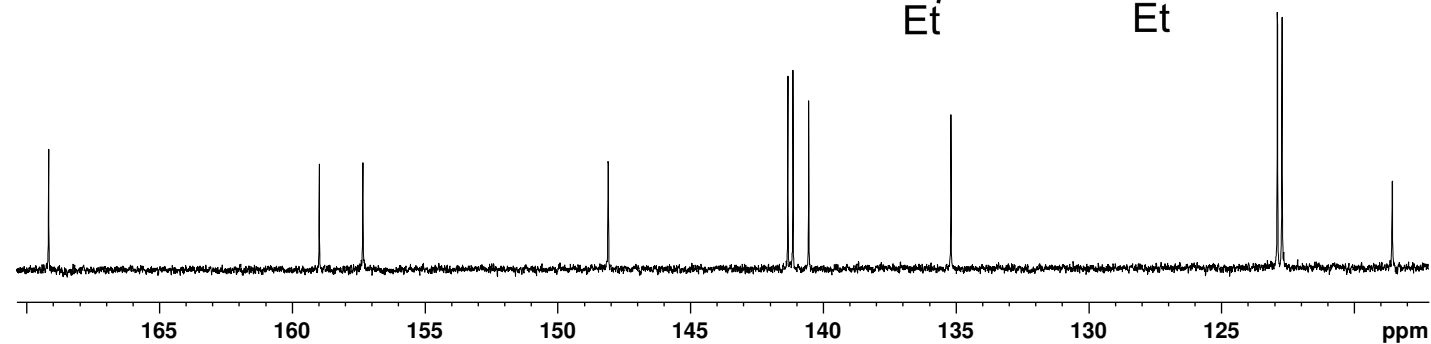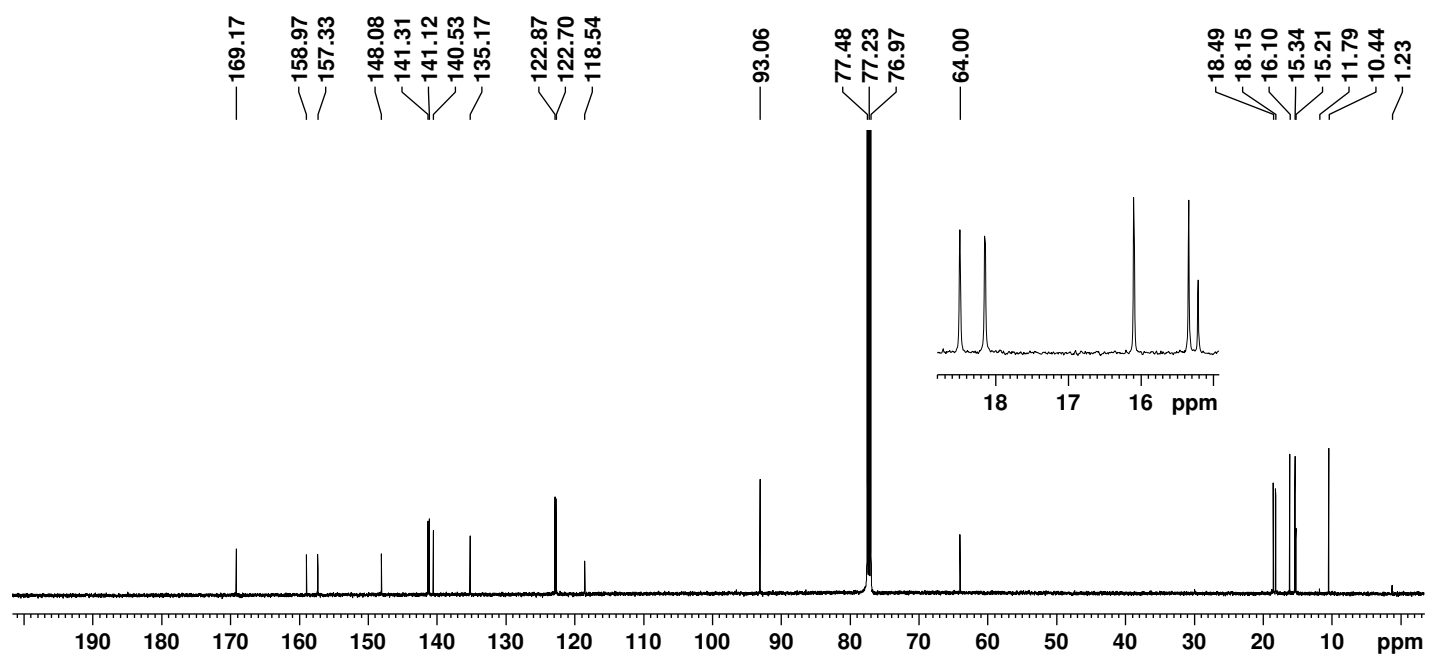

Figure S66. 125 MHz carbon-13 NMR spectrum of **7b** in  $\text{CDCl}_3$ .



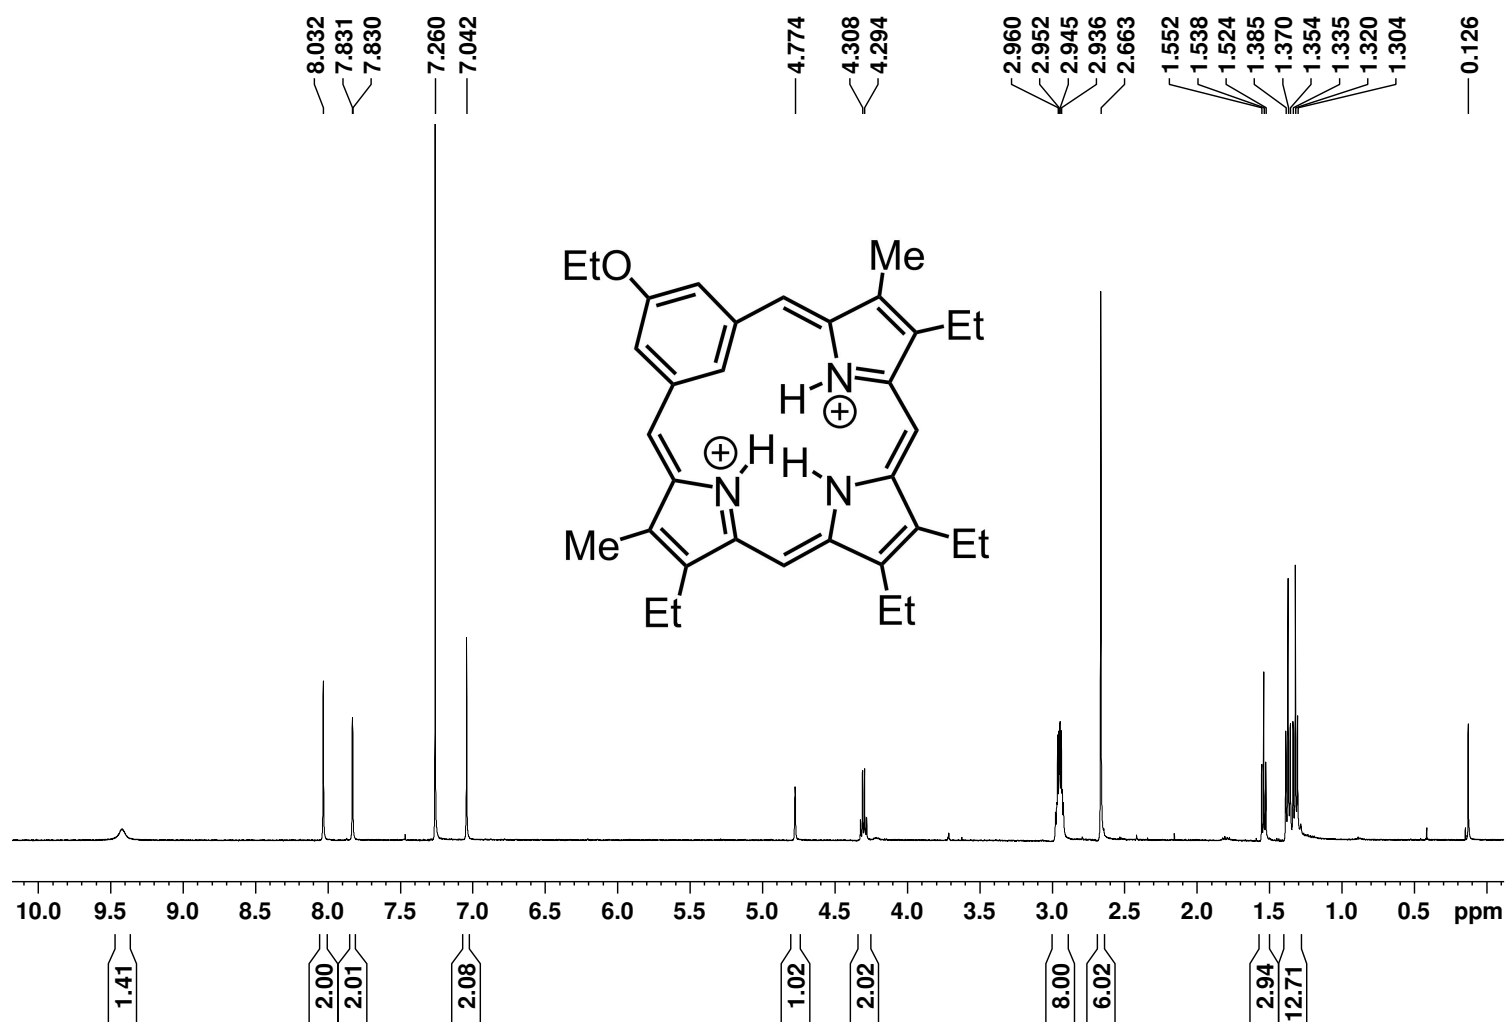

Figure S67. 500 MHz proton NMR spectrum of ethoxybenziporphyrin dication **7bH<sub>2</sub><sup>2+</sup>** in TFA-CDCl<sub>3</sub>.

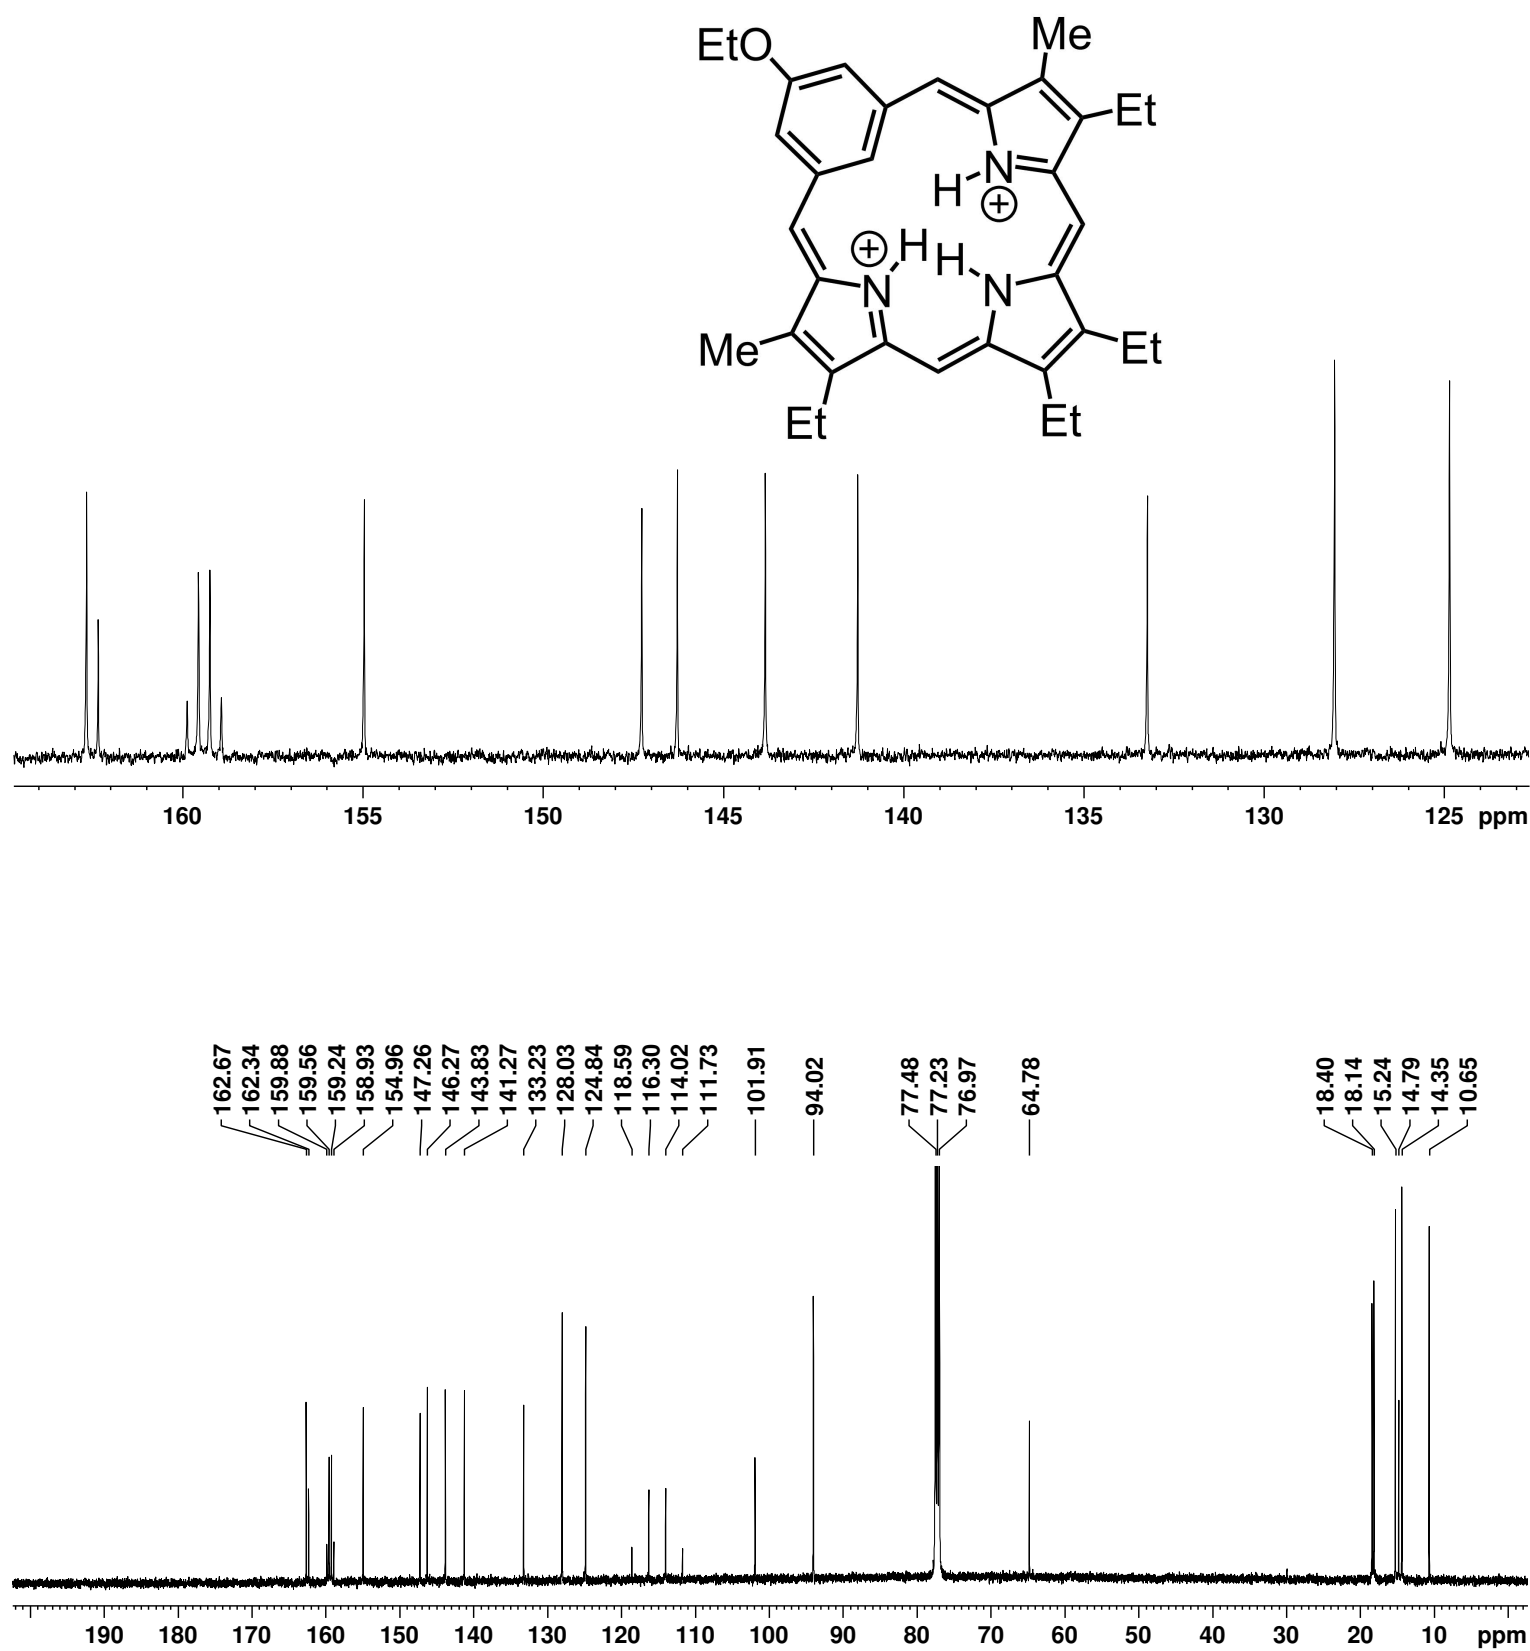

Figure S68. 125 MHz carbon-13 NMR spectrum of **7bH<sub>2</sub><sup>2+</sup>** in TFA-CDCl<sub>3</sub>.

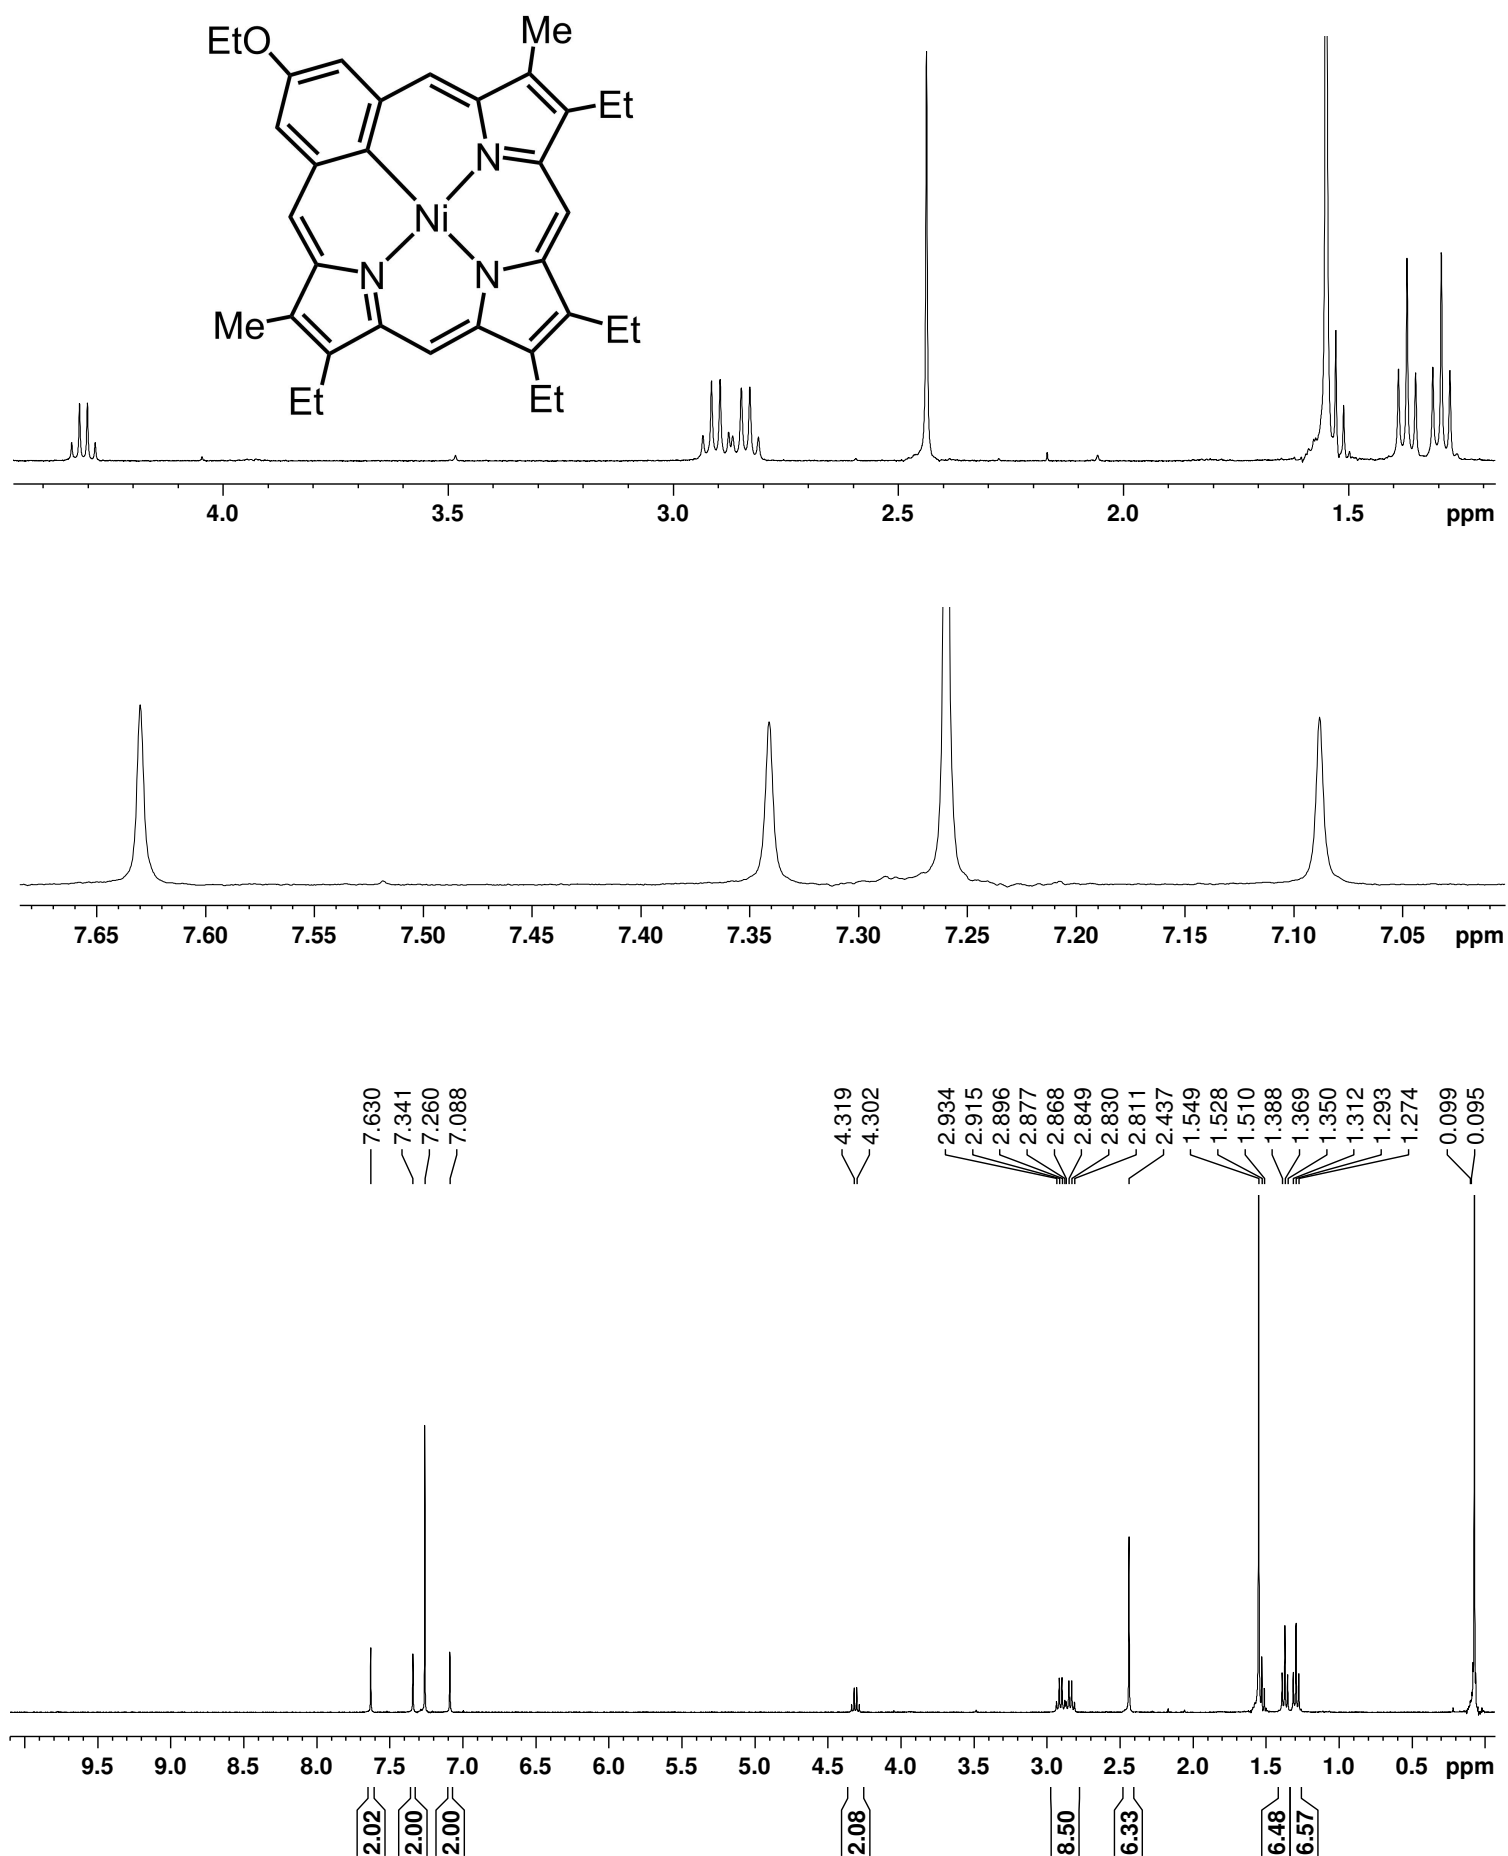

Figure S69. 500 MHz proton NMR spectrum of nickel(II) complex **7bNi** in CDCl<sub>3</sub>.

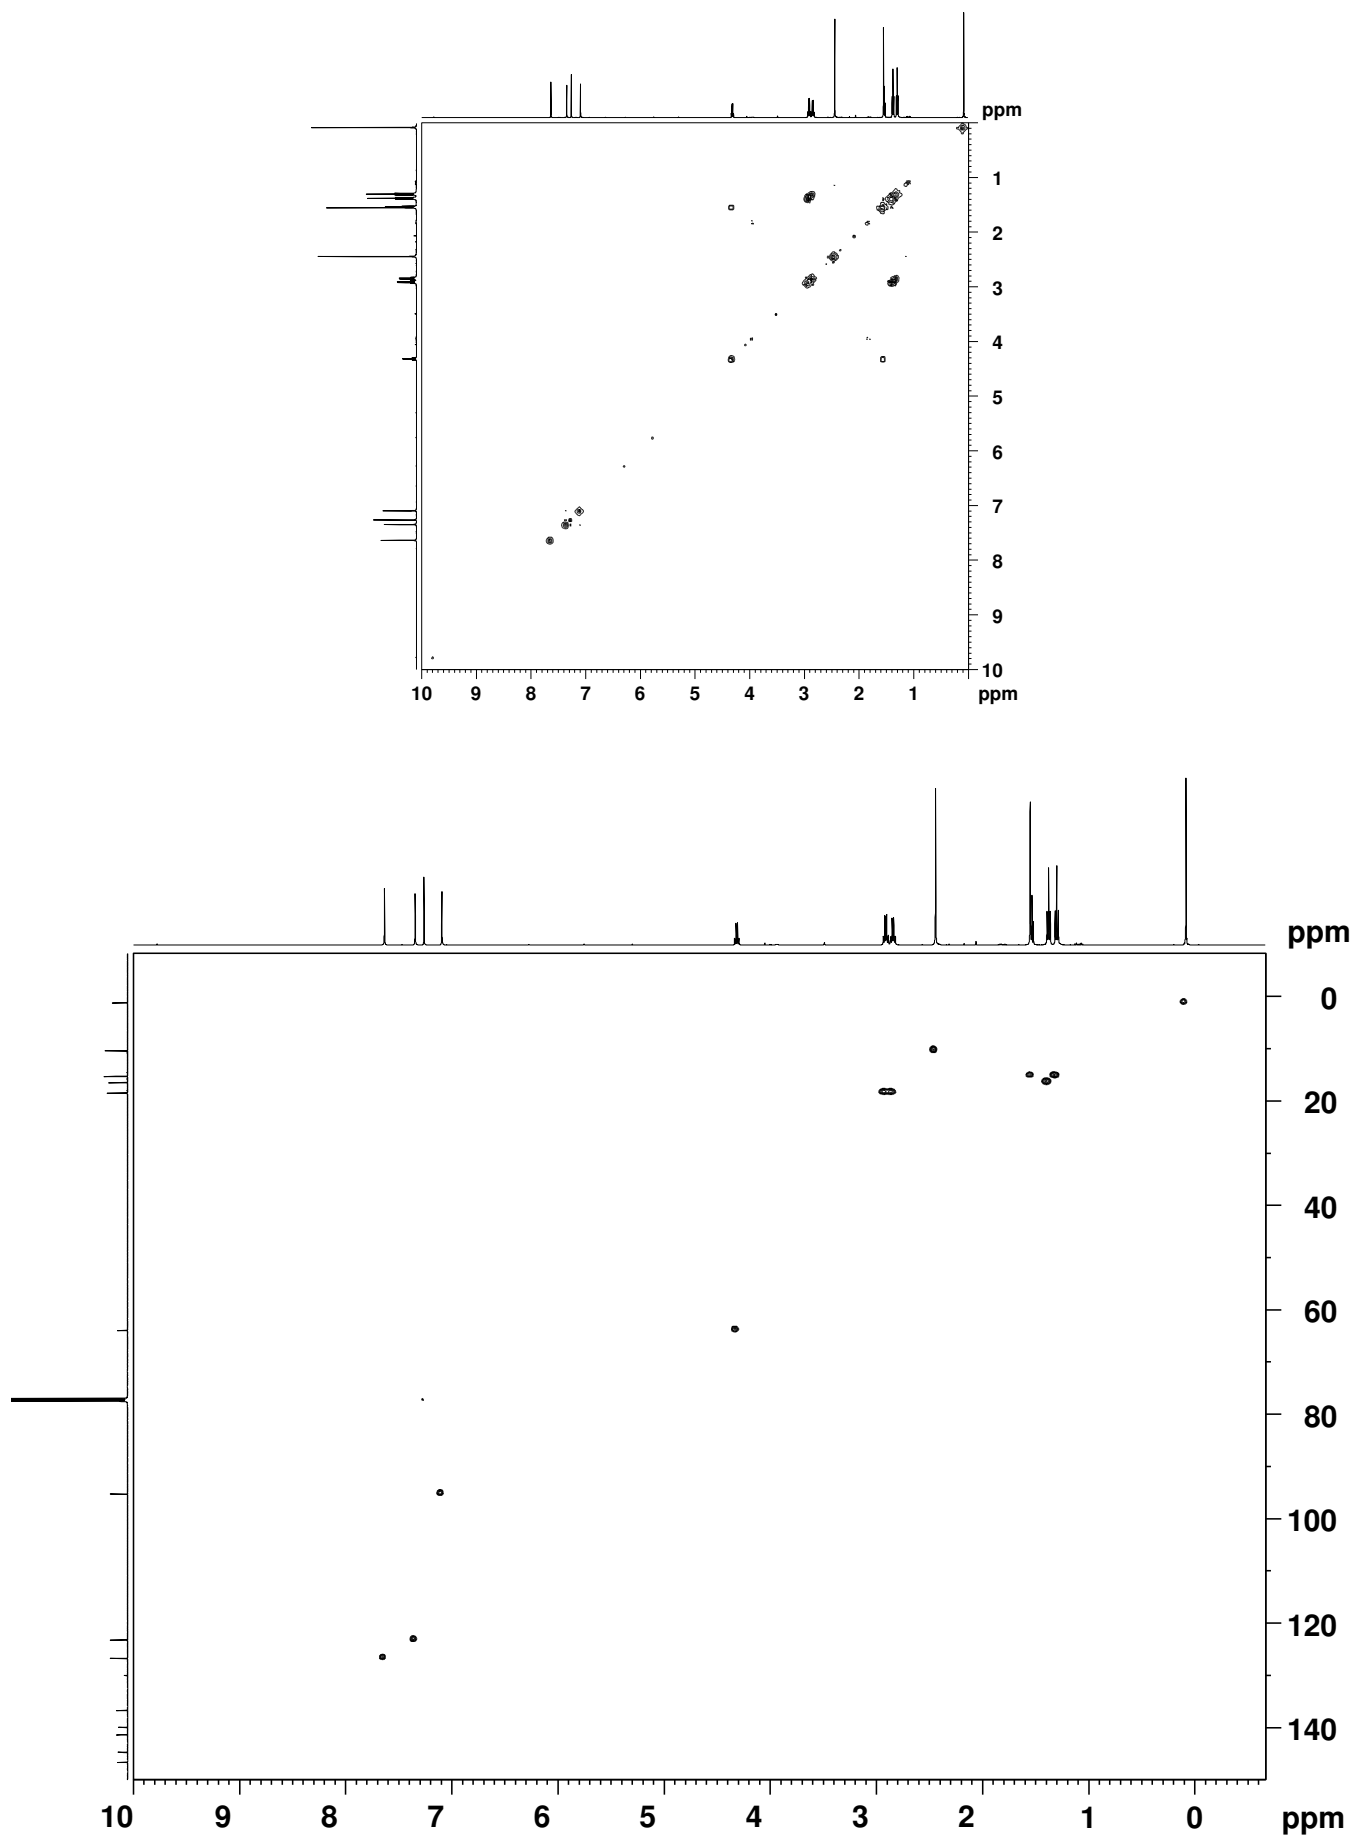

Figure S70.  $^1\text{H}$ - $^1\text{H}$  COSY (top) and HSQC (bottom) NMR spectra of **7bNi** in  $\text{CDCl}_3$ .

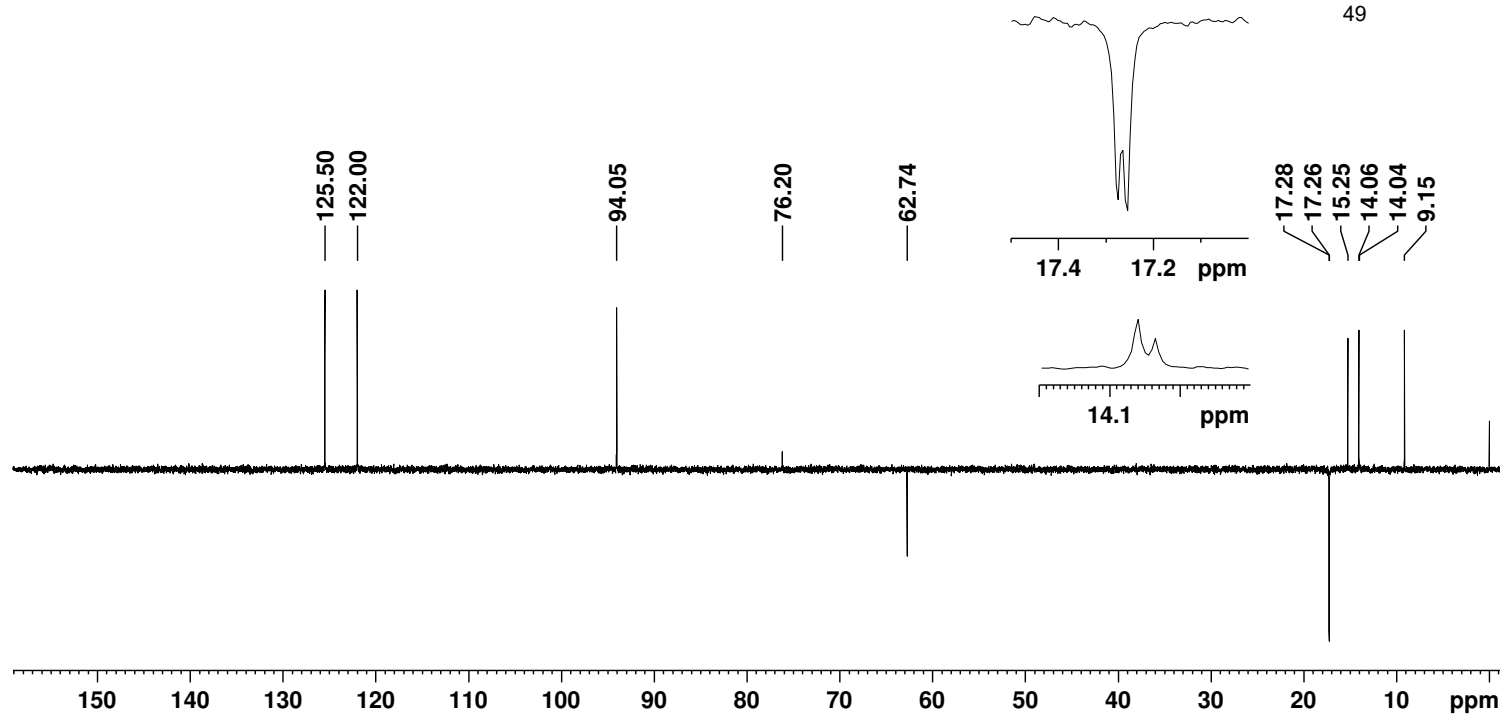

Figure S71. DEPT-135 NMR spectrum of **7bNi** in  $\text{CDCl}_3$ .

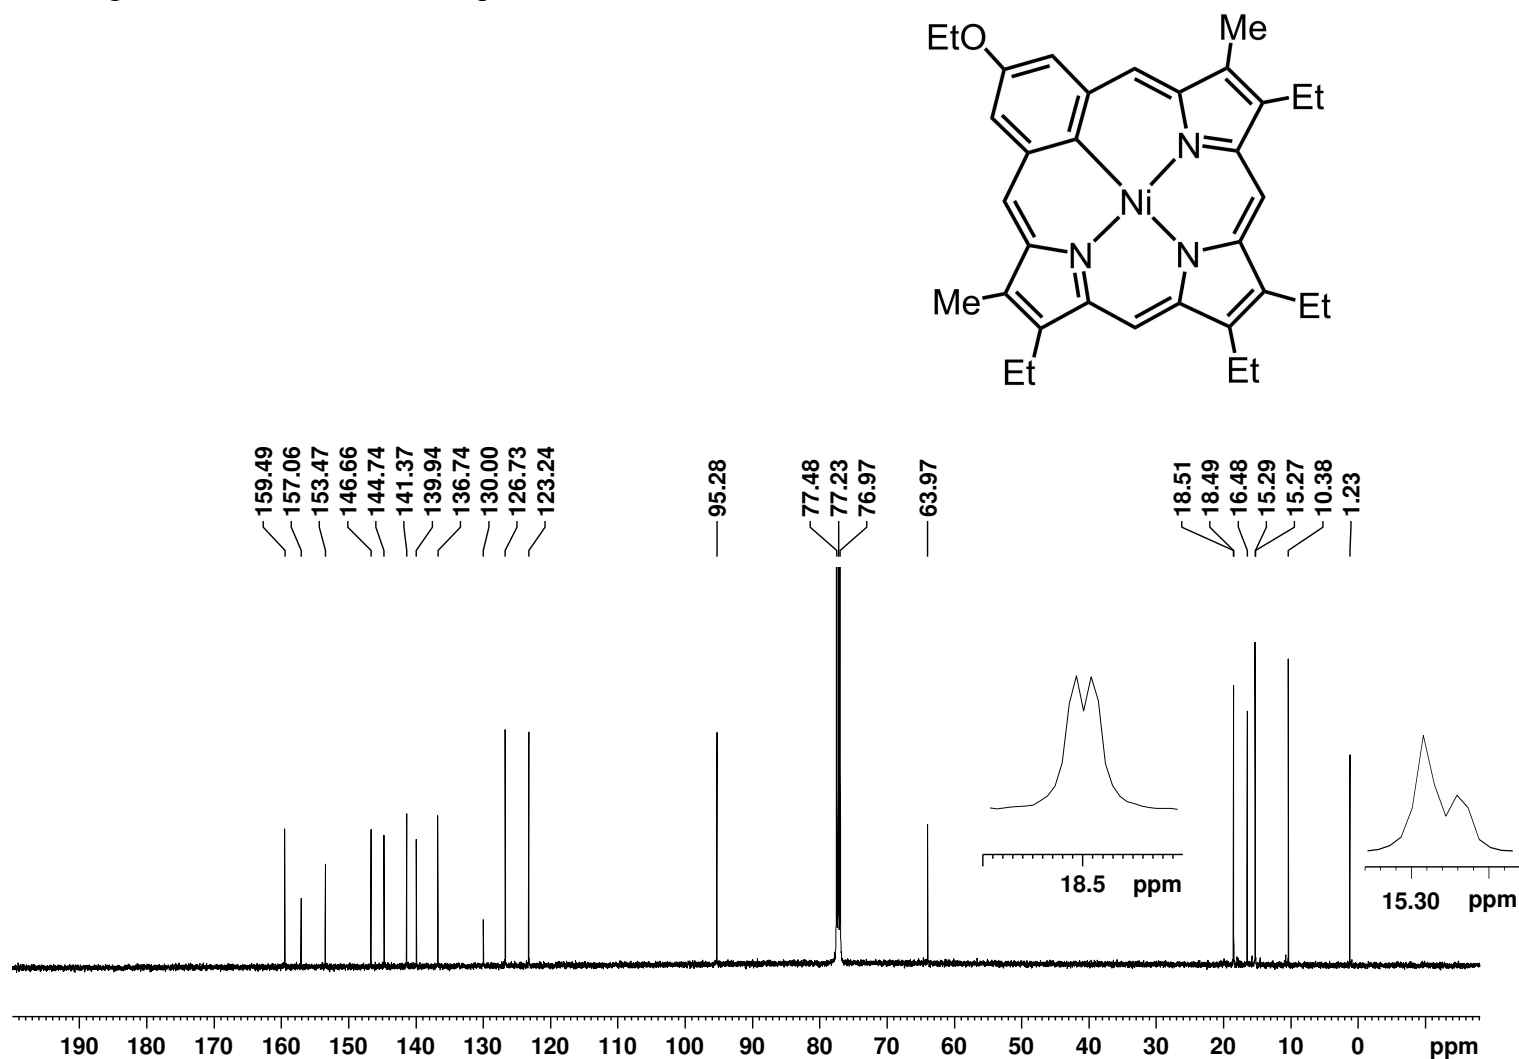

Figure S72. 125 MHz carbon-13 NMR spectrum of **7bNi** in  $\text{CDCl}_3$ .

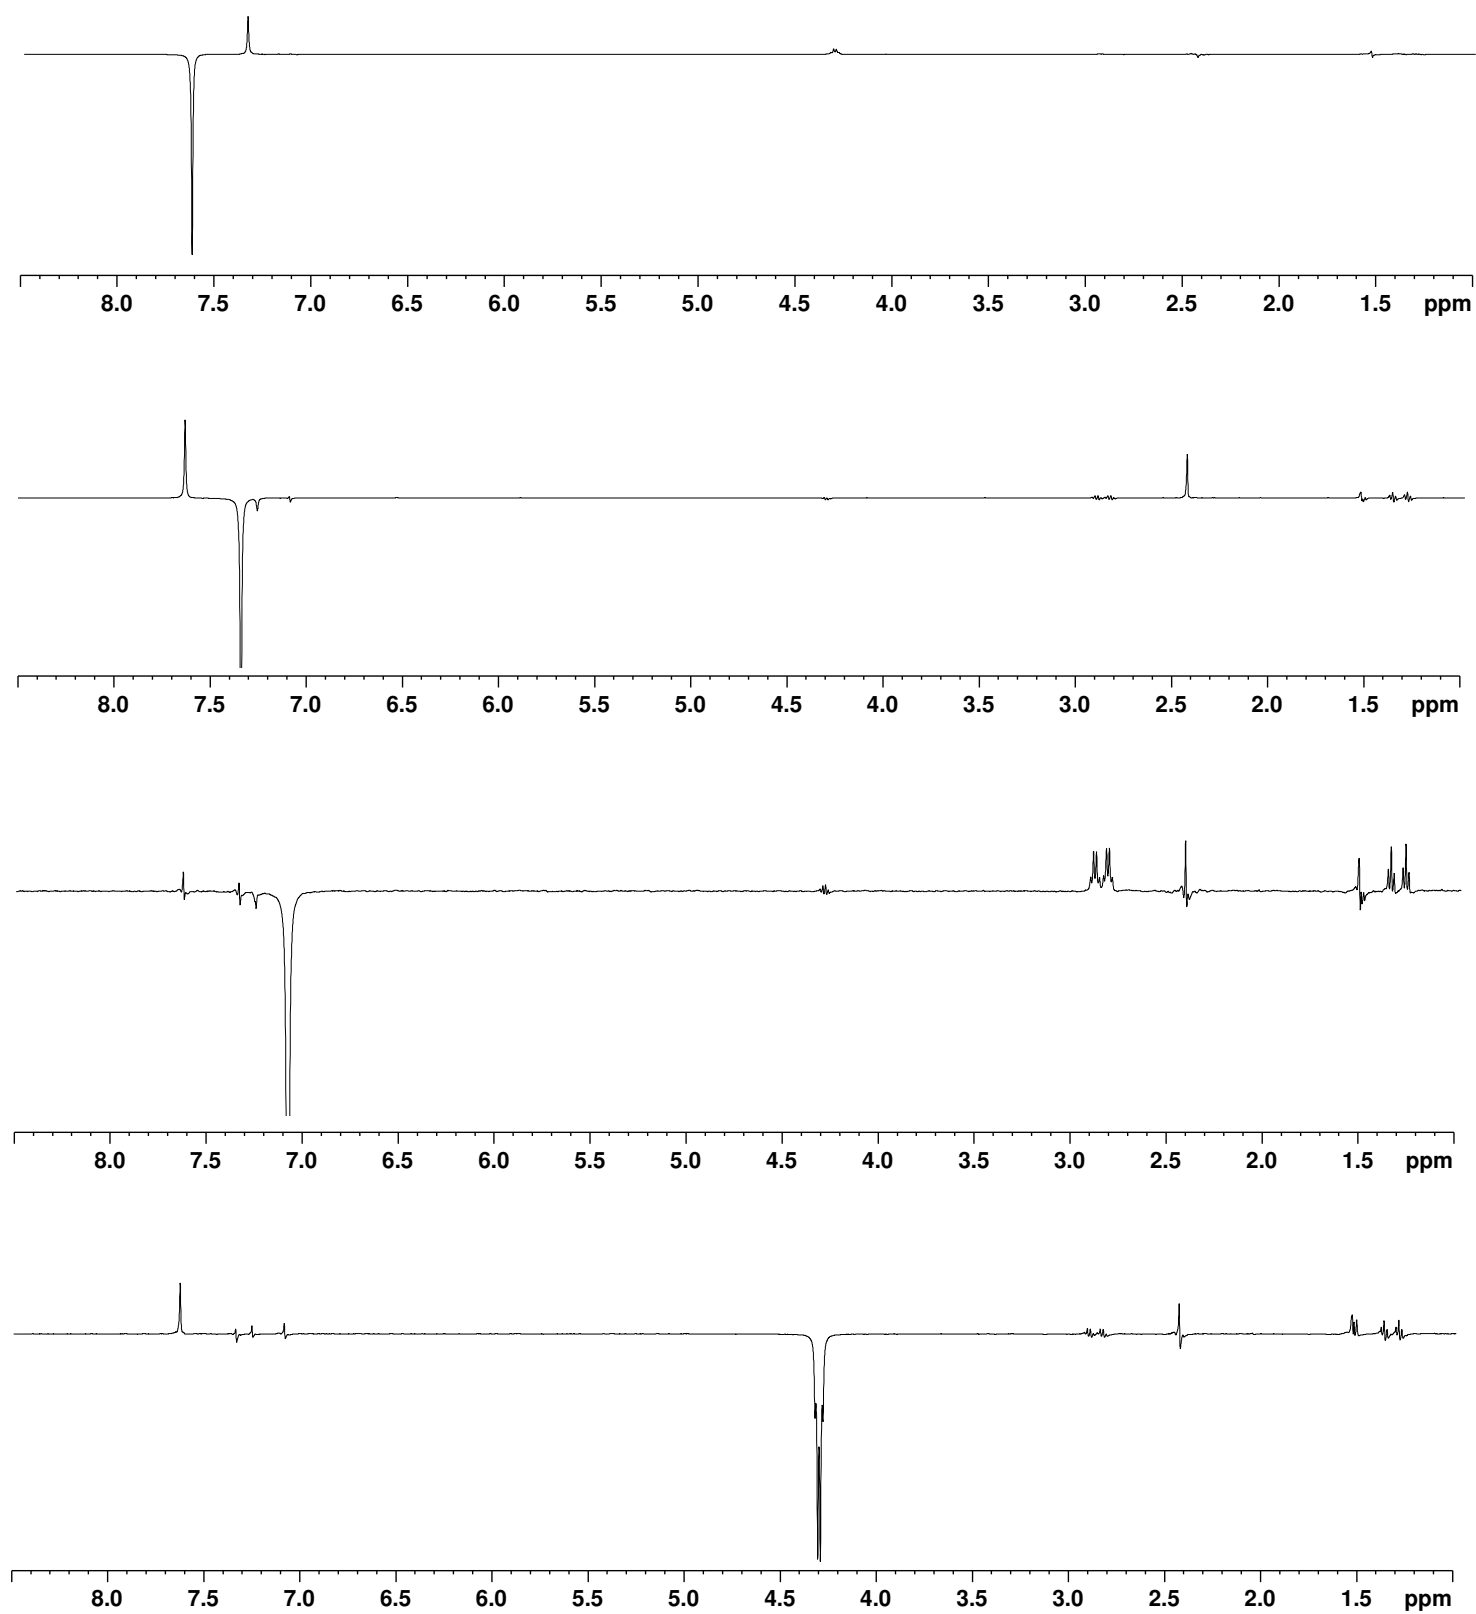

Figure S73. Selected nOe difference proton NMR spectra of **7bNi** in  $\text{CDCl}_3$ .

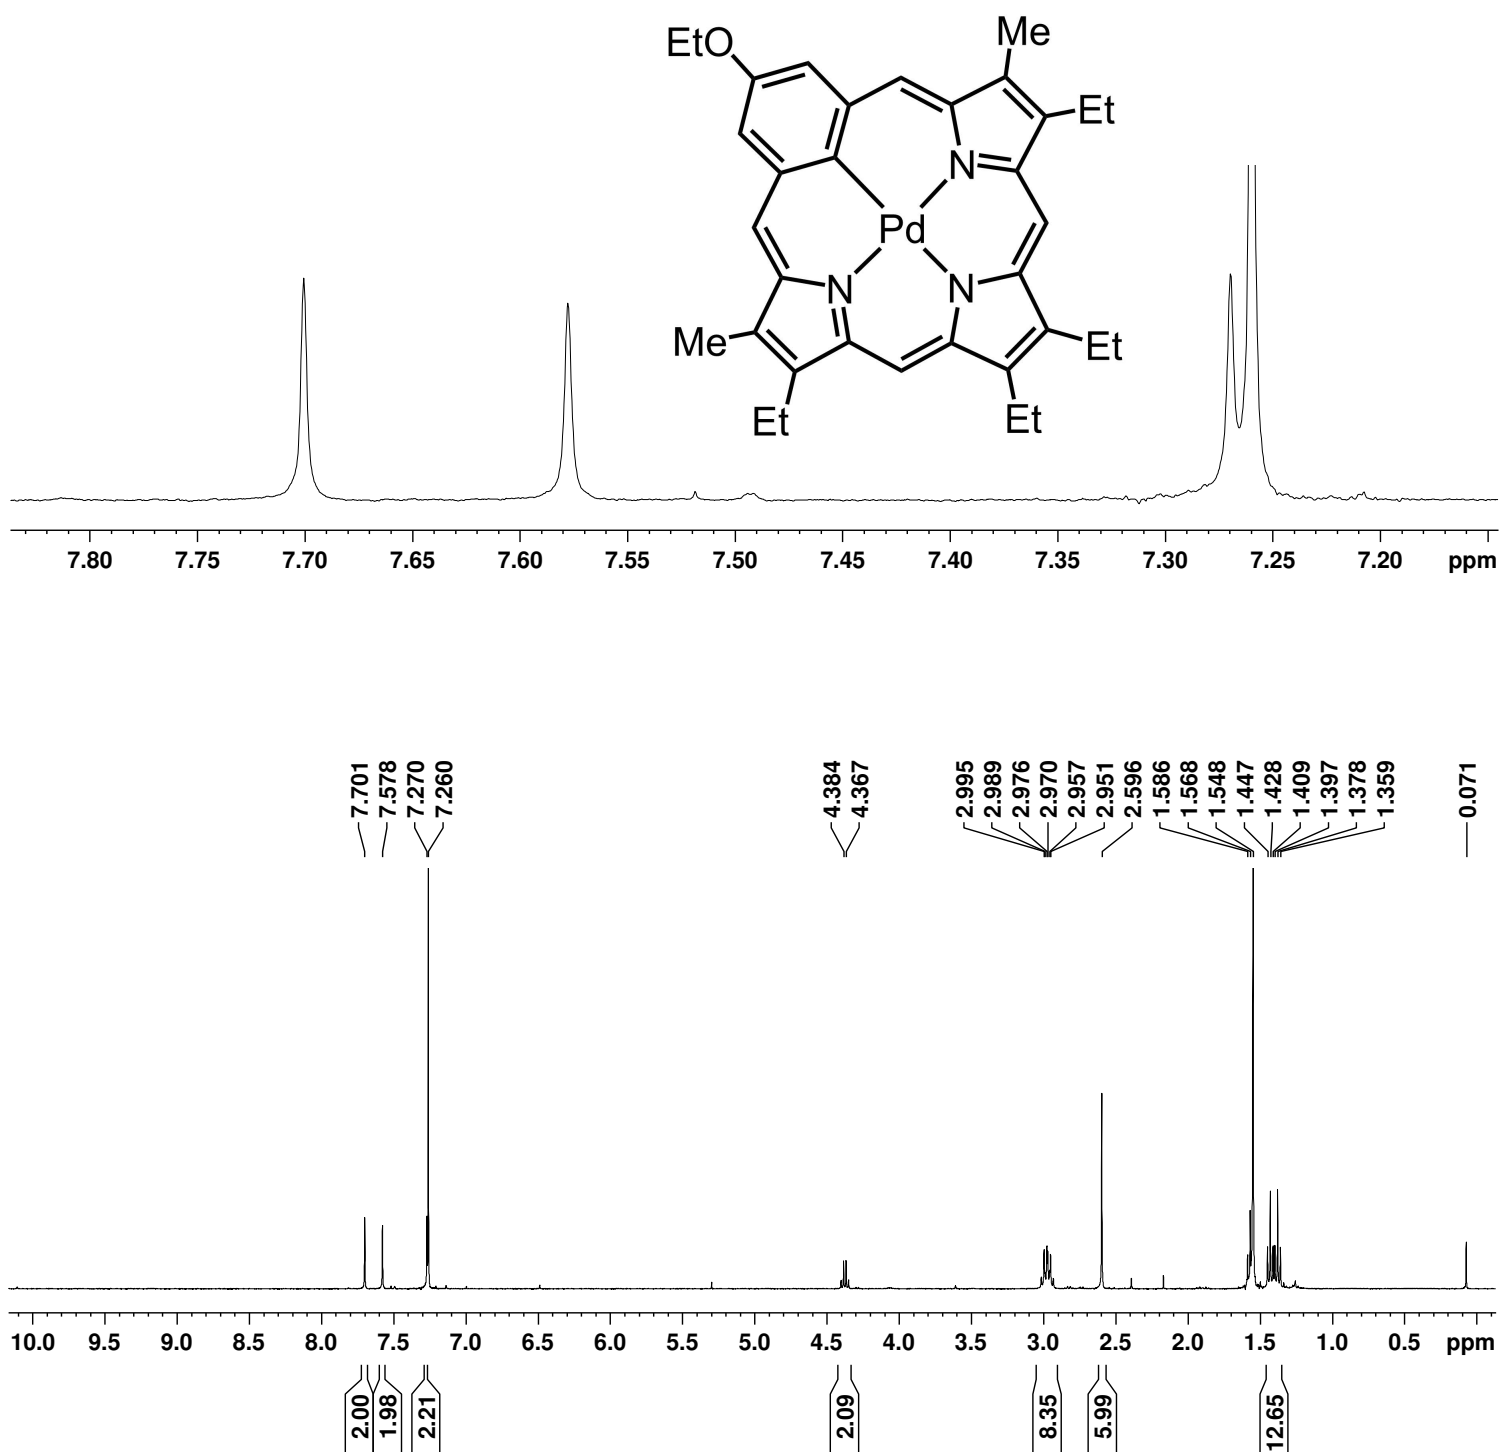

Figure S74. 500 MHz proton NMR spectrum of palladium complex **7bPd** in CDCl<sub>3</sub>.

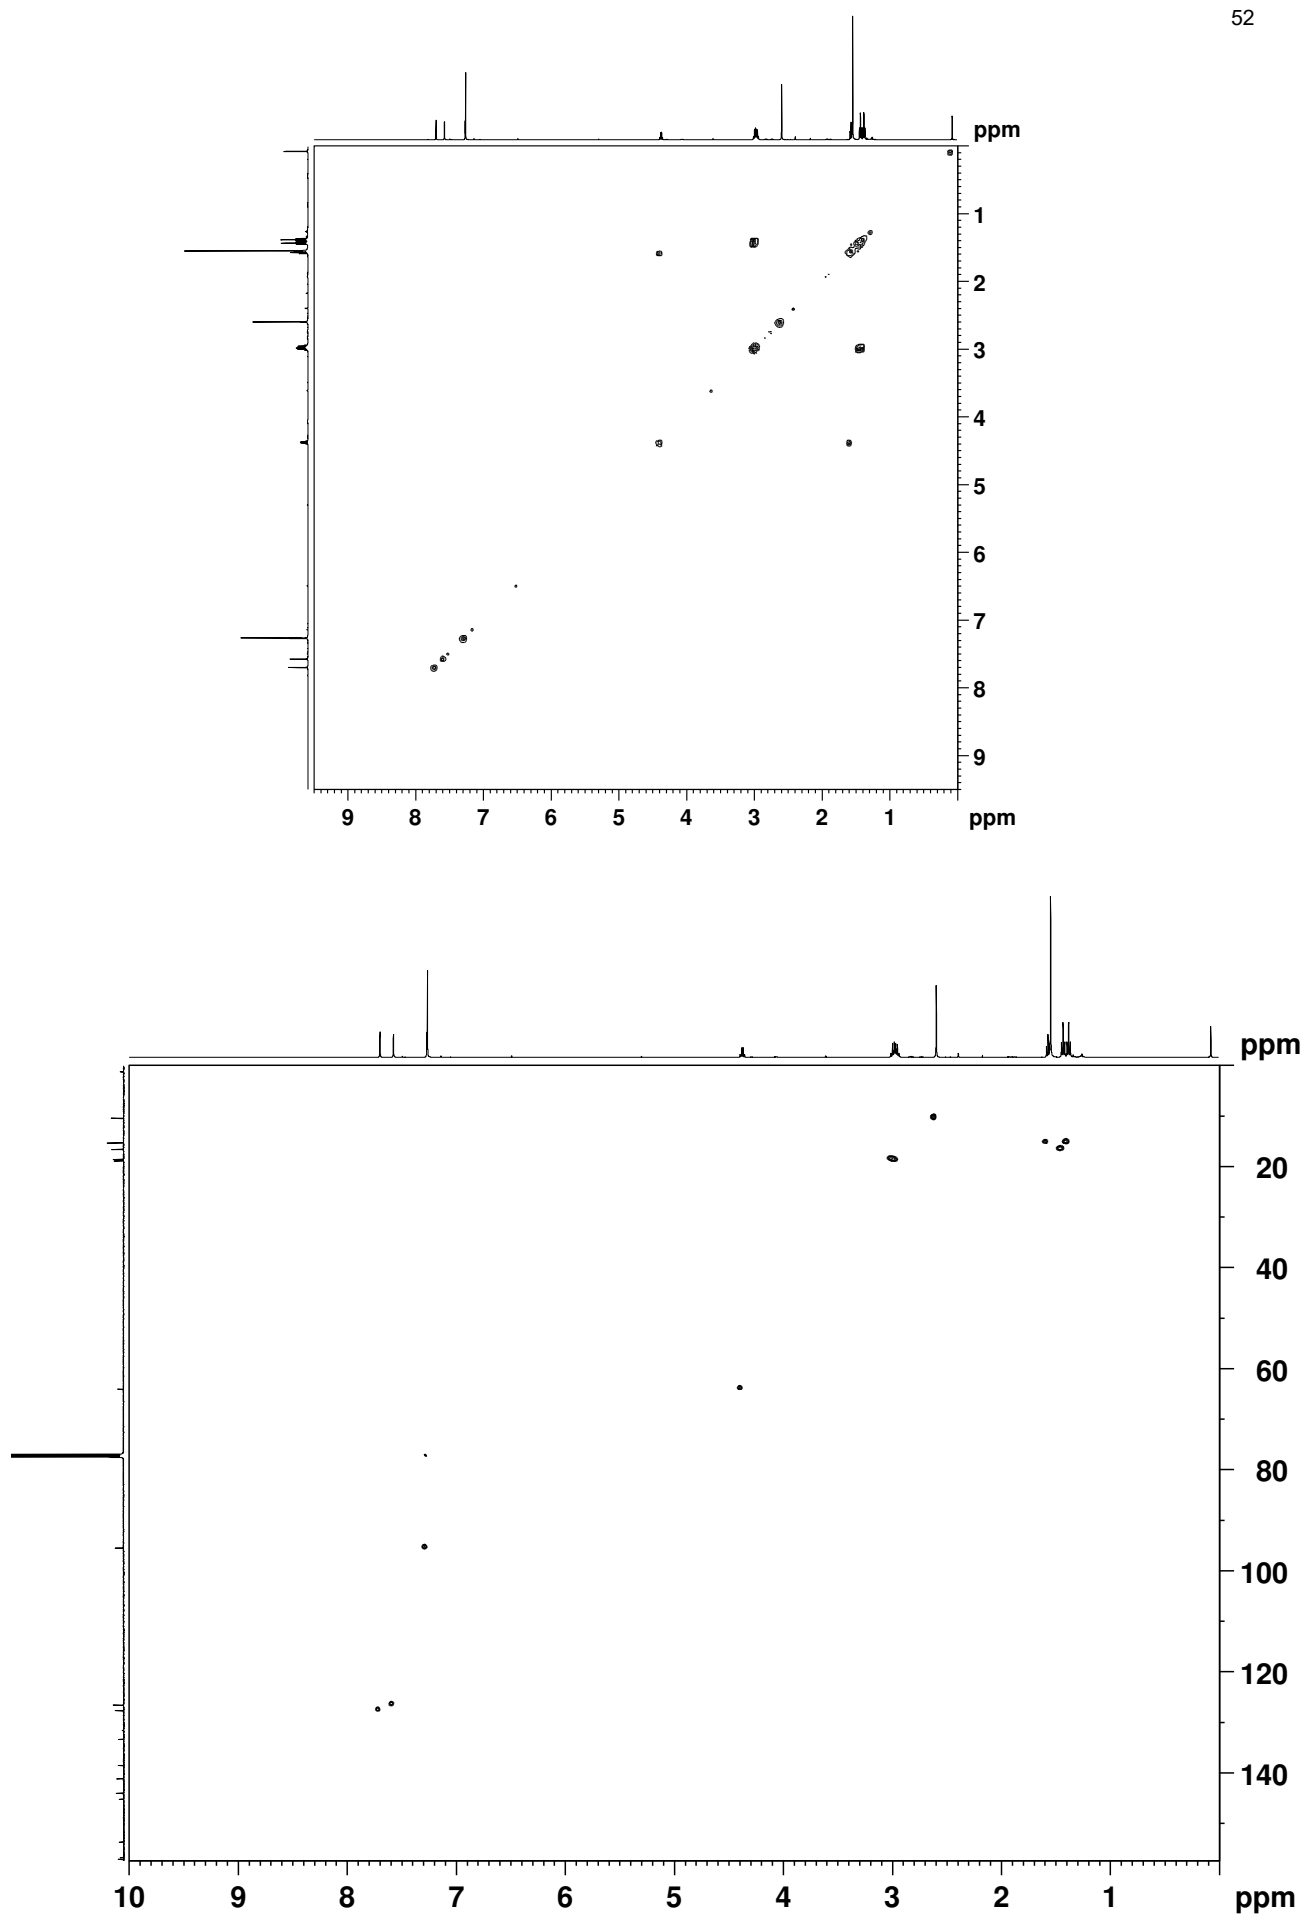

Figure S75.  $^1\text{H}$ - $^1\text{H}$  COSY (top) and HSQC (bottom) NMR spectra of **7bPd** in  $\text{CDCl}_3$ .



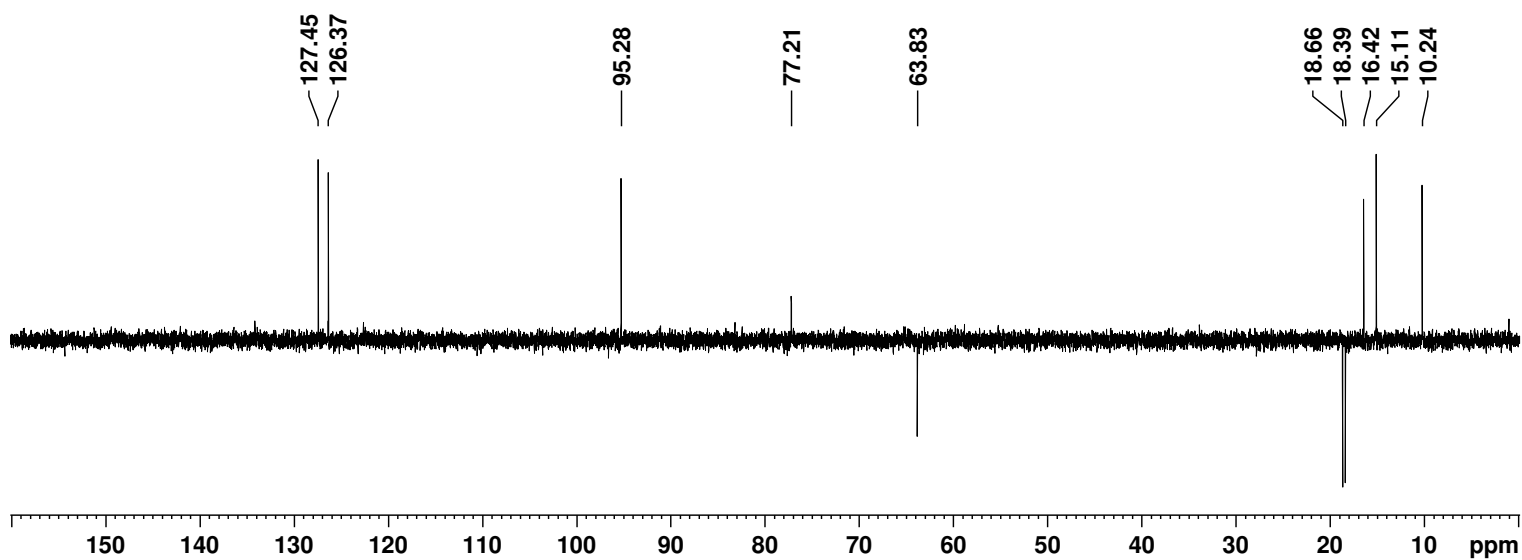

Figure S76. DEPT-135 NMR spectrum of **7bPd** in  $\text{CDCl}_3$ .

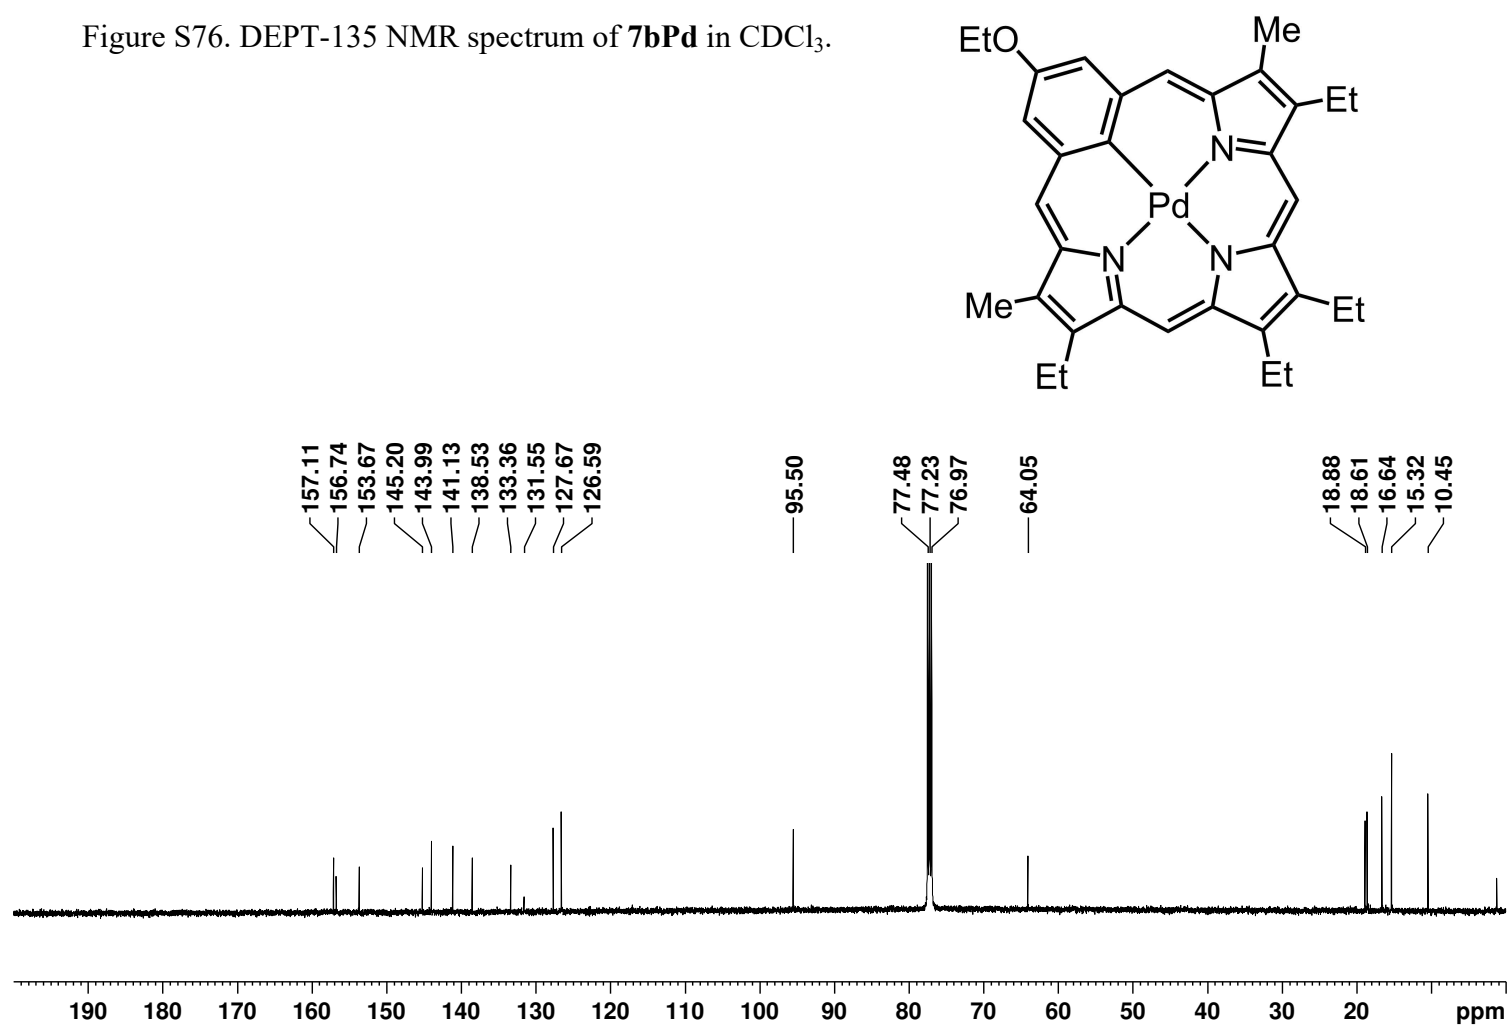

Figure S77. 125 MHz carbon-13 NMR spectrum of **7bPd** in  $\text{CDCl}_3$ .

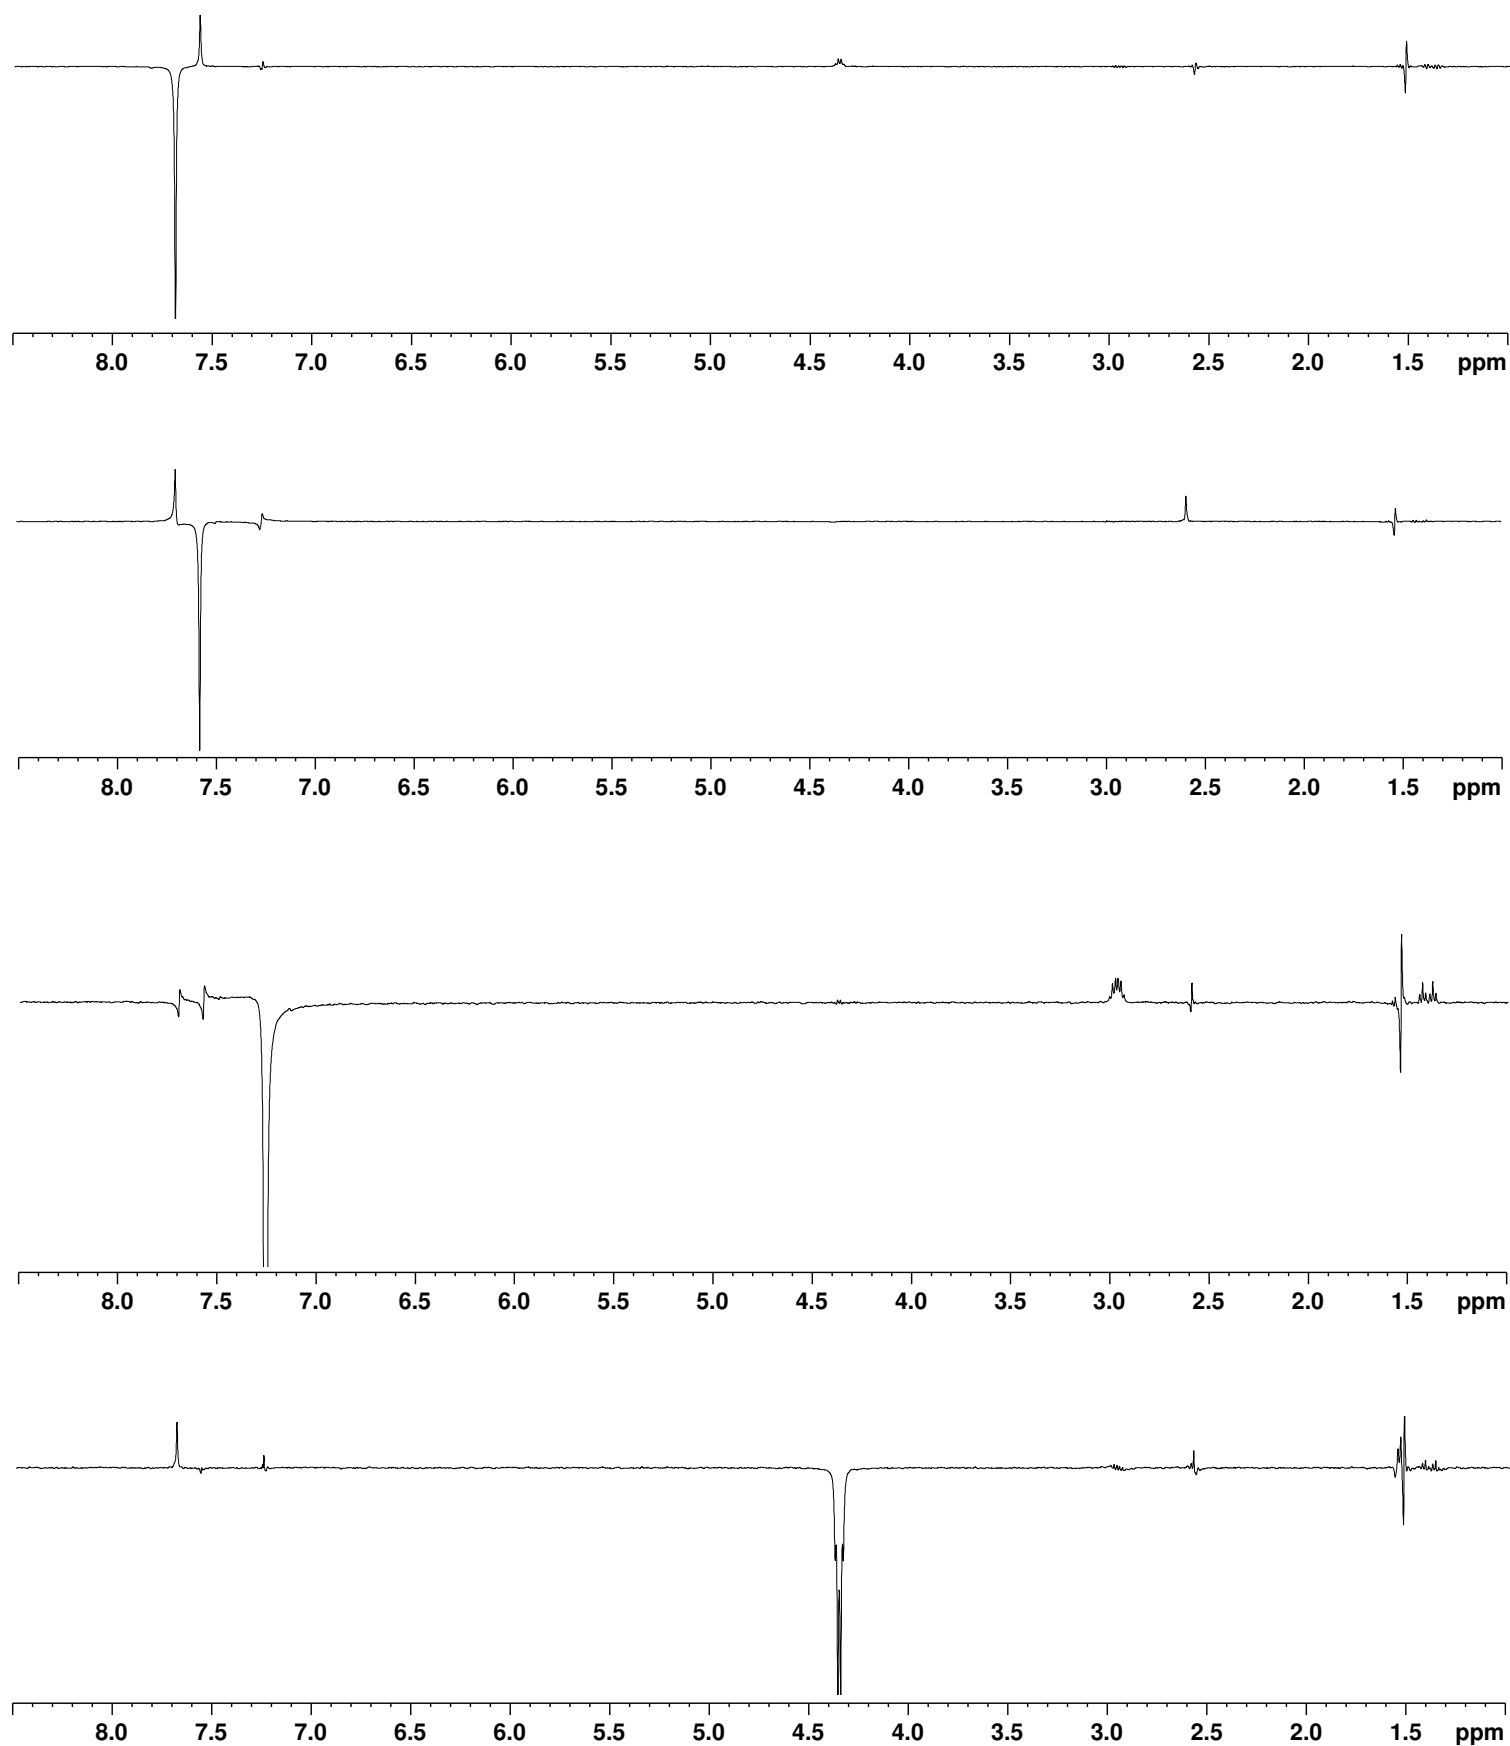

Figure S78. Selected nOe difference proton NMR spectra of **7bPd** in  $\text{CDCl}_3$ .

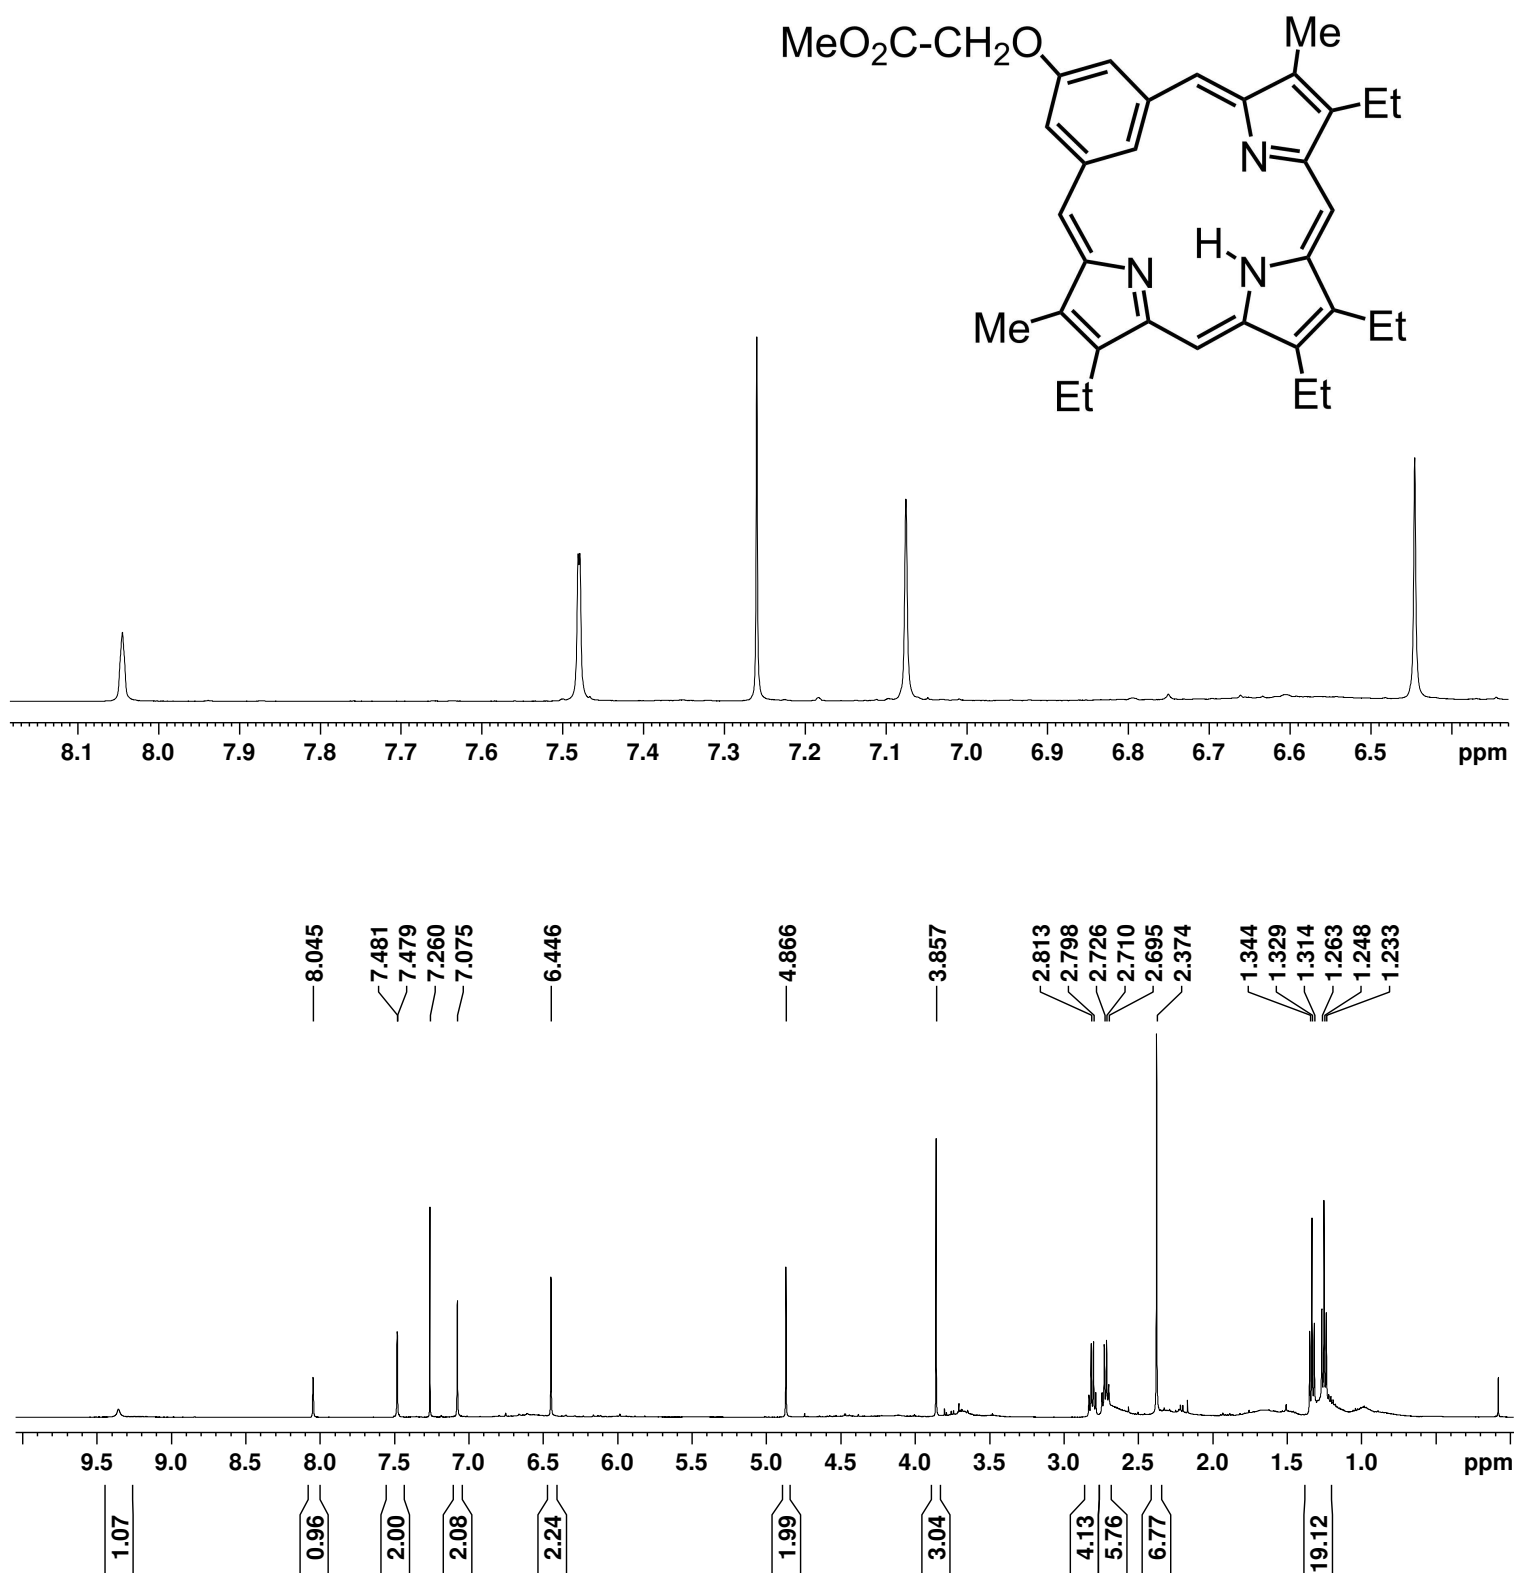

Figure S79. 500 MHz proton NMR spectrum of methoxycarbonylmethoxybenzporphyrin **7c** in CDCl<sub>3</sub>.

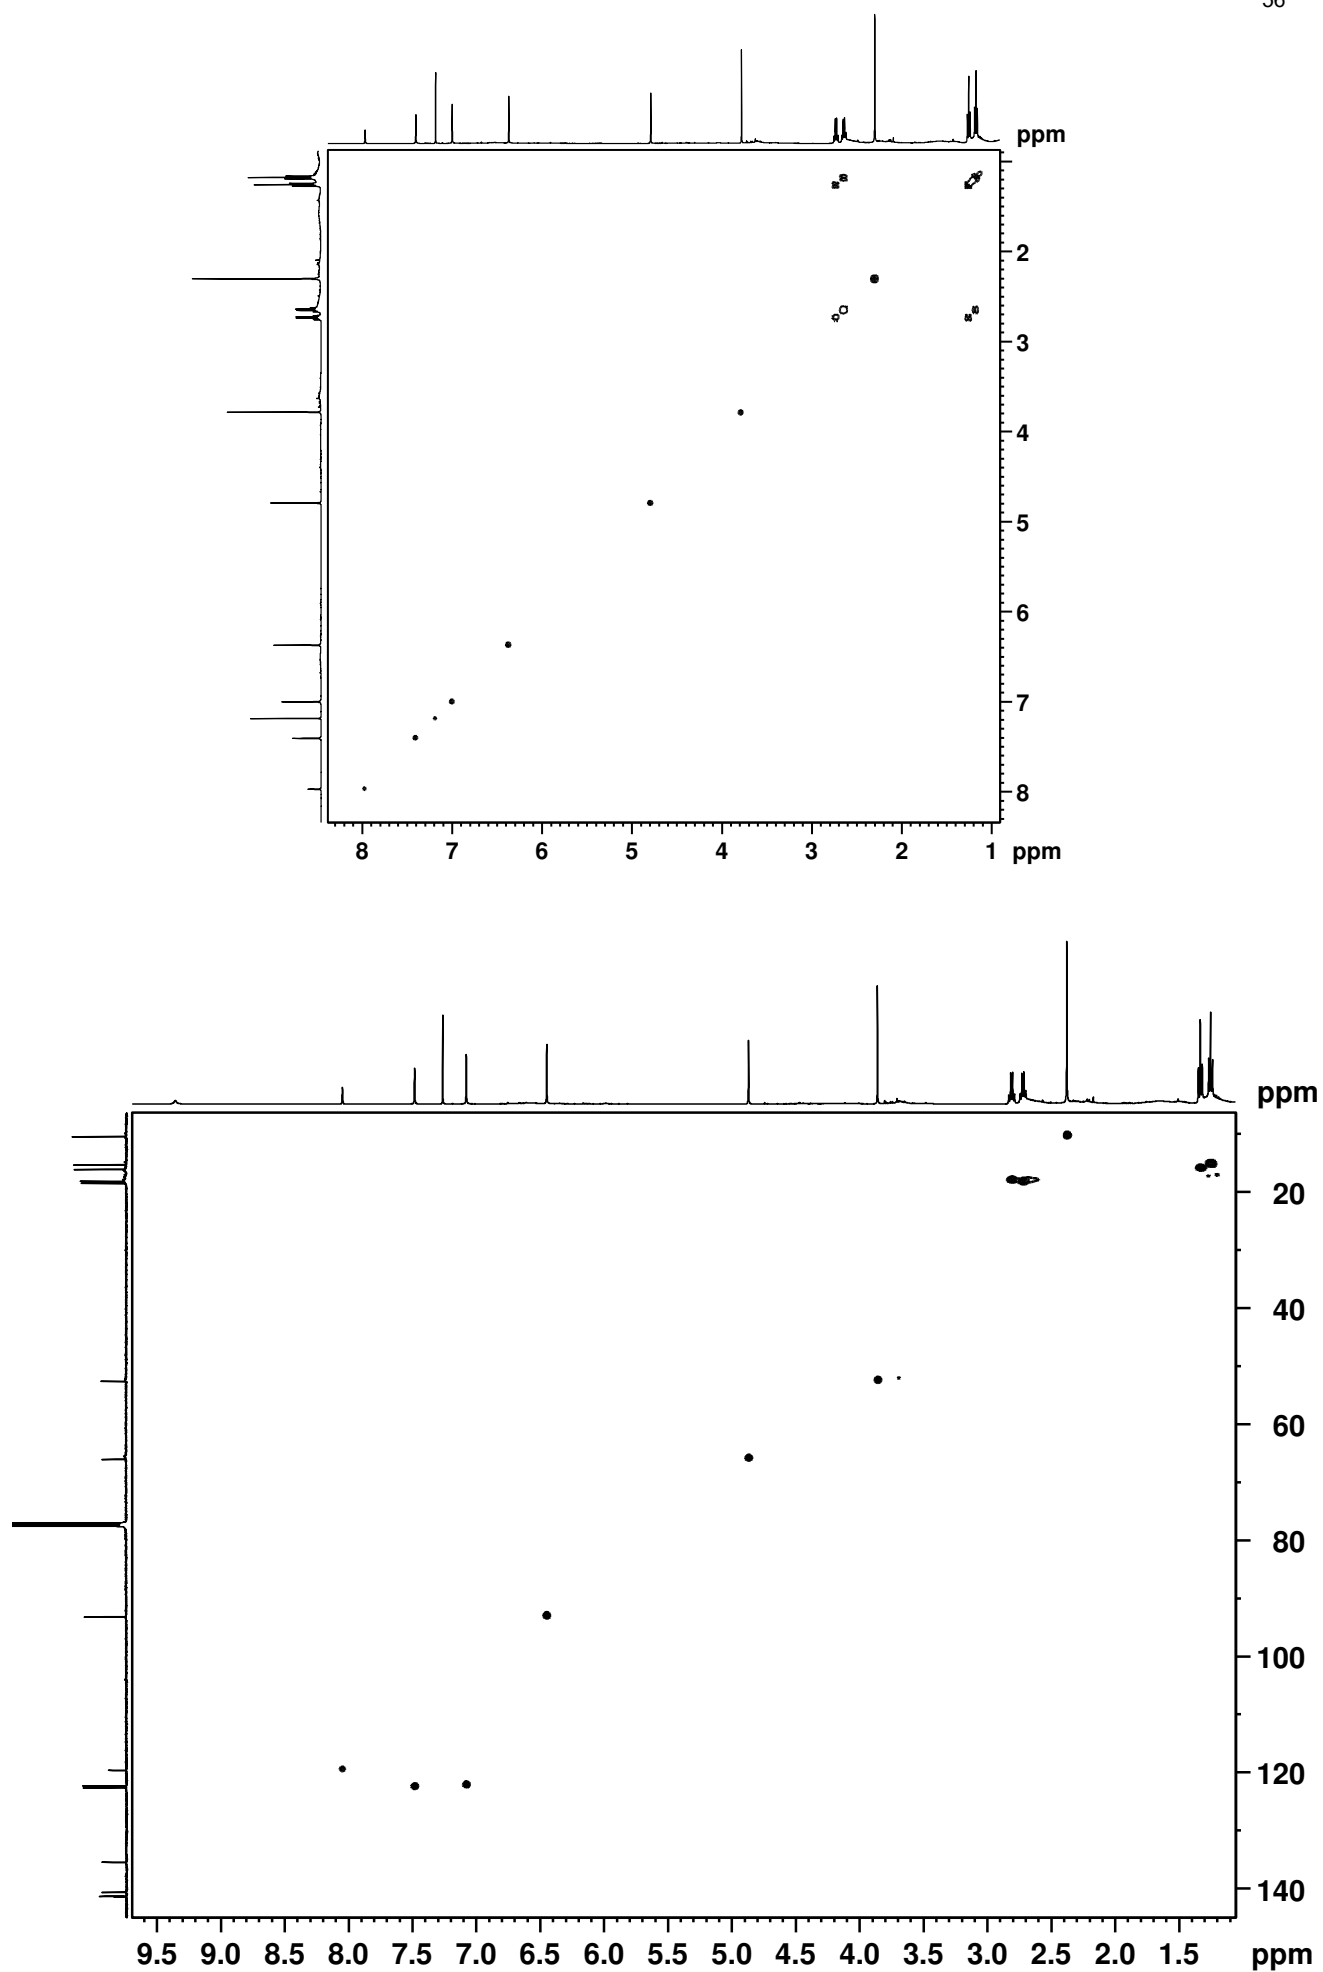

Figure S80.  $^1\text{H}$ - $^1\text{H}$  COSY (top) and HSQC (bottom) NMR spectra of **7c** in  $\text{CDCl}_3$ .

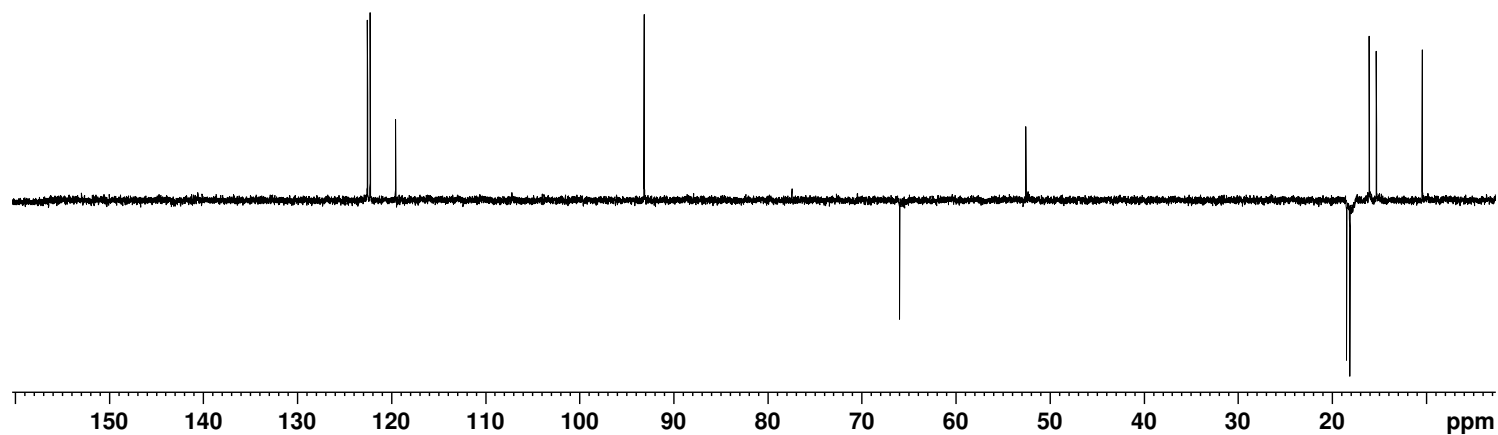

Figure S81. DEPT-135 NMR spectrum of **7c** in  $\text{CDCl}_3$ .

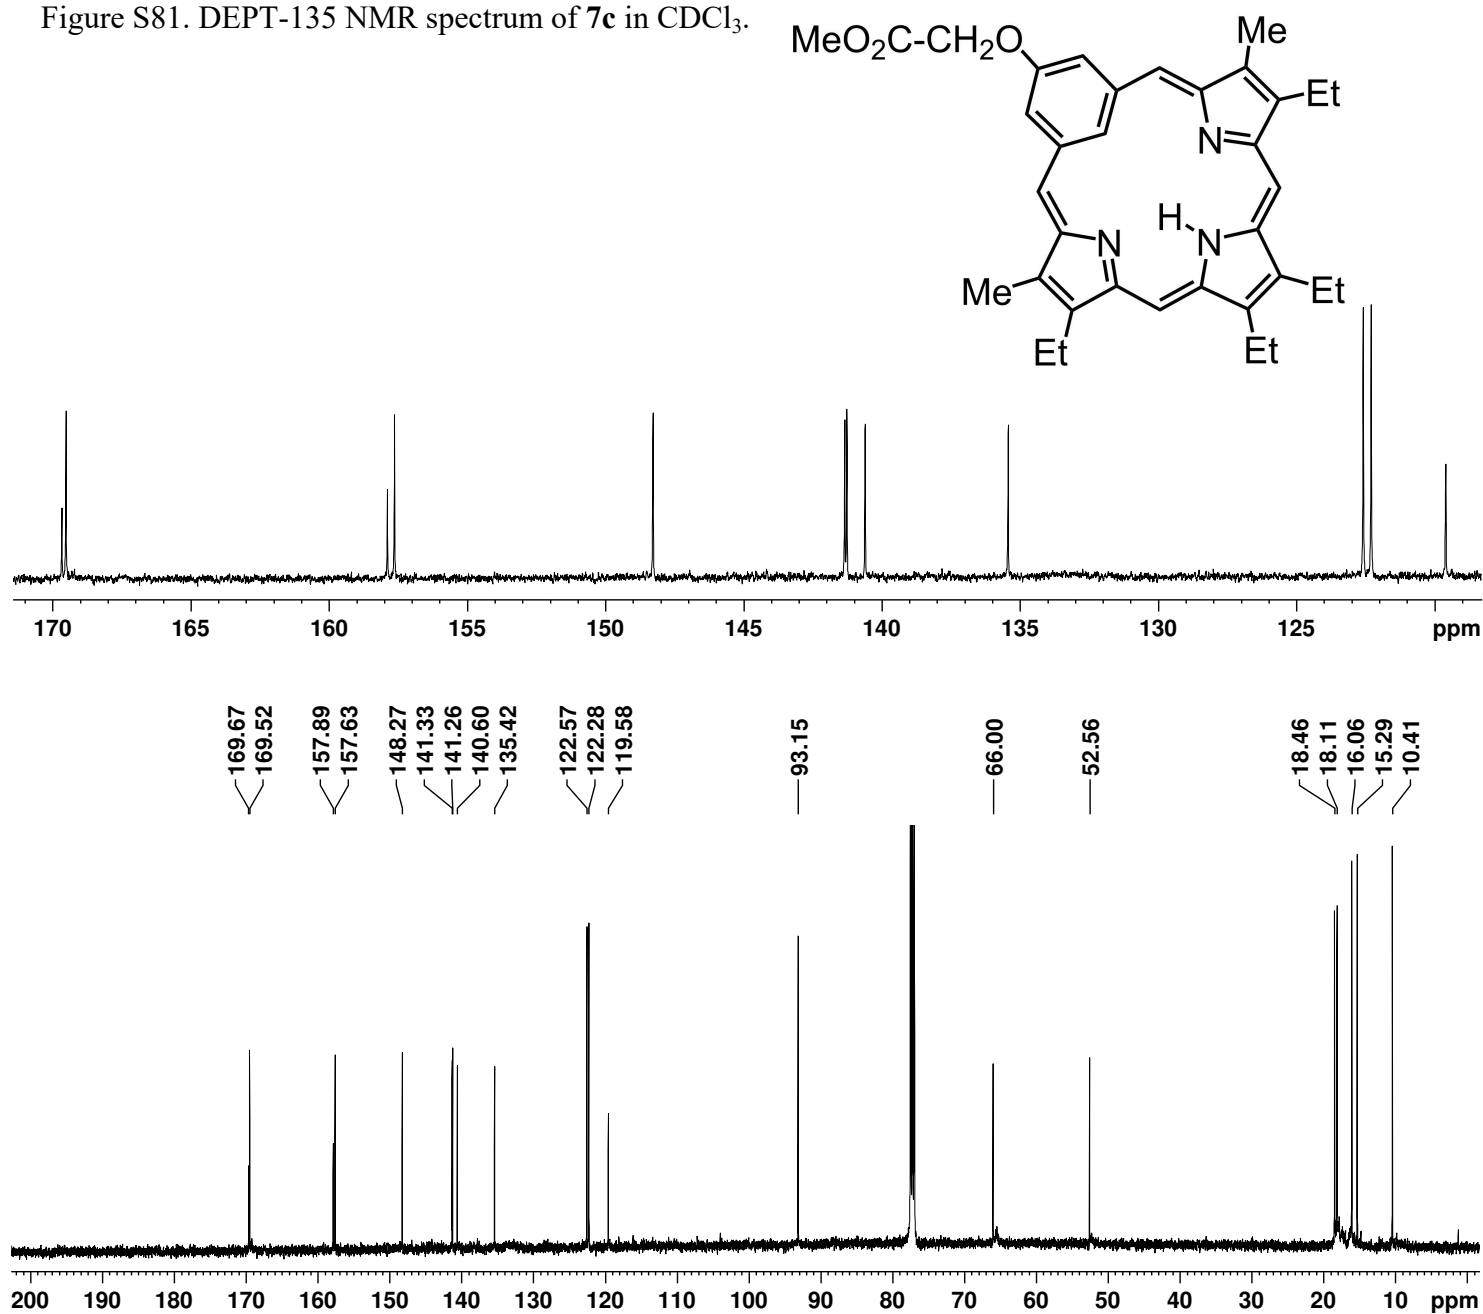

Figure S82. 125 MHz carbon-13 NMR spectrum of **7c** in  $\text{CDCl}_3$ .

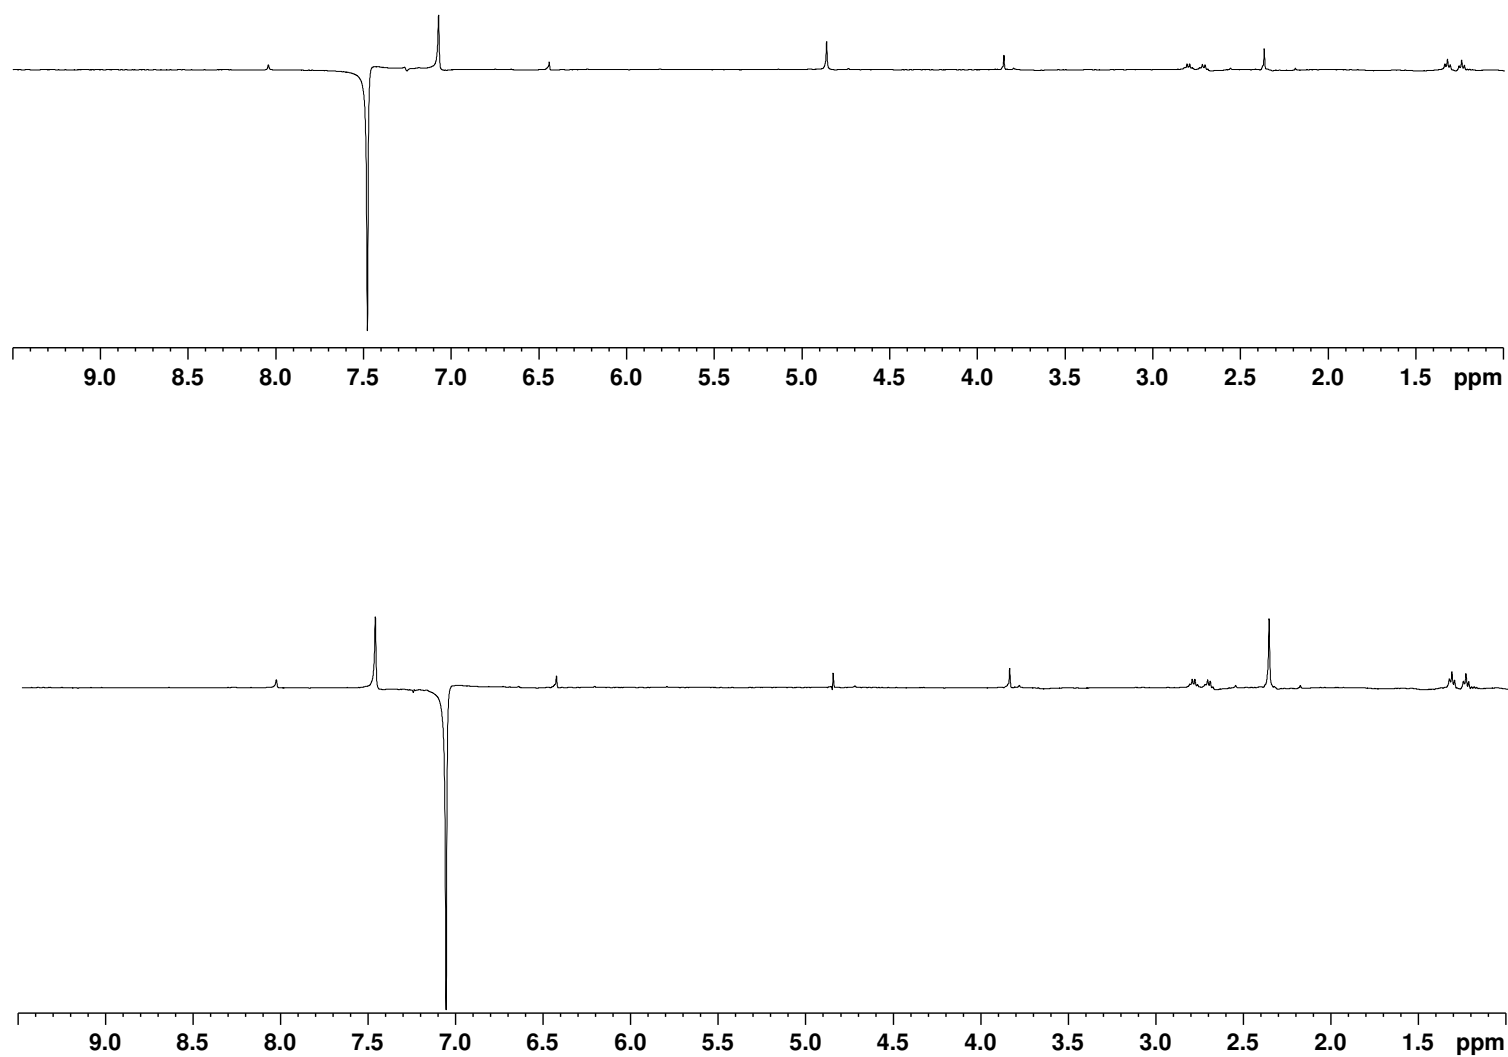

Figure S83. Selected nOe difference proton NMR spectra of **7c** in  $\text{CDCl}_3$ .

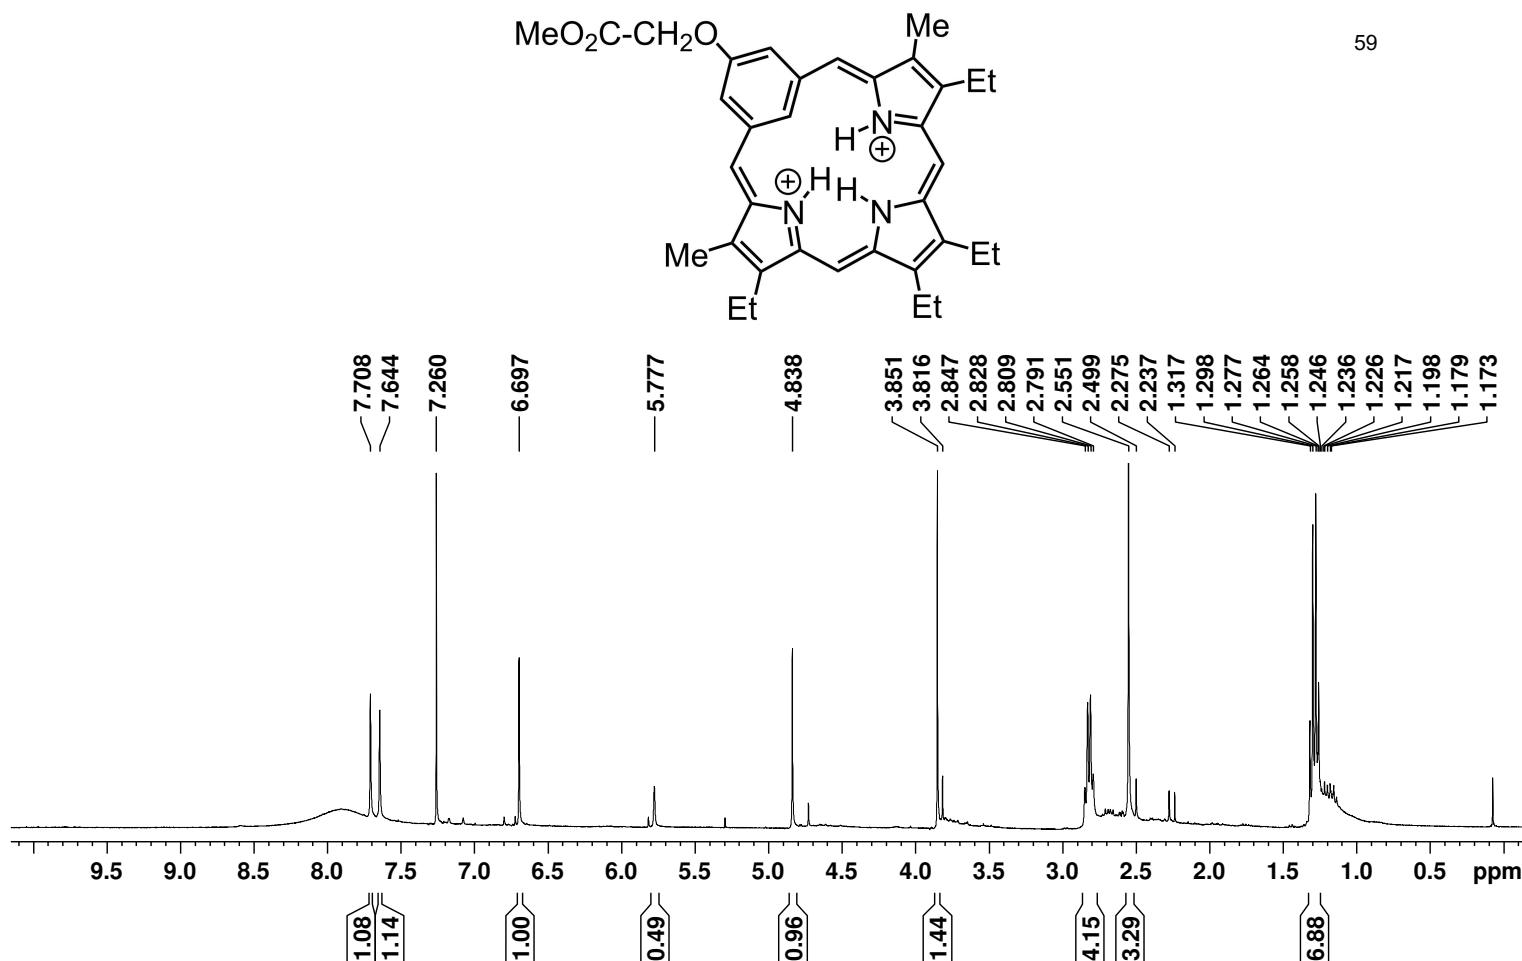

Figure S84. 500 MHz proton NMR spectrum of **7cH<sub>2</sub><sup>2+</sup>** in TFA-CDCl<sub>3</sub>.

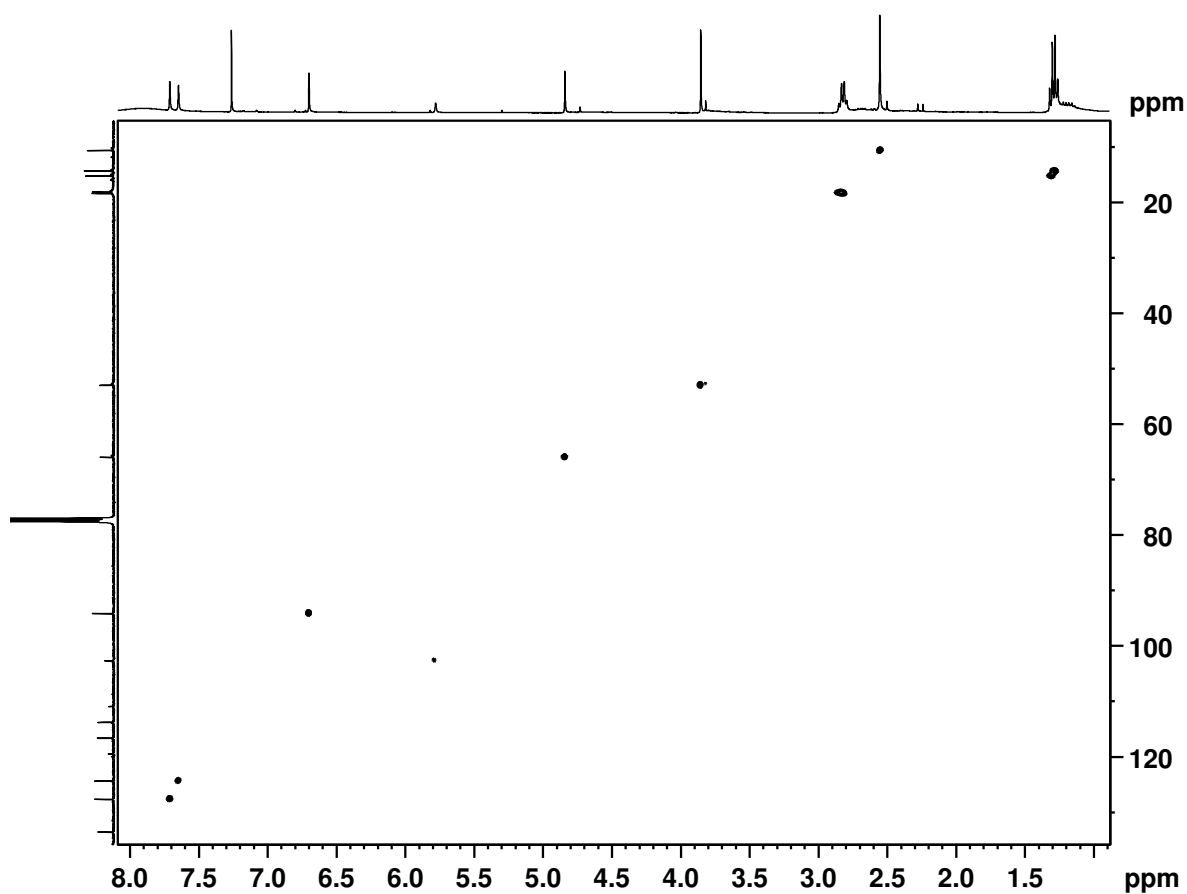

Figure S85. HSQC NMR spectrum of **7cH<sub>2</sub><sup>2+</sup>** in TFA-CDCl<sub>3</sub>.

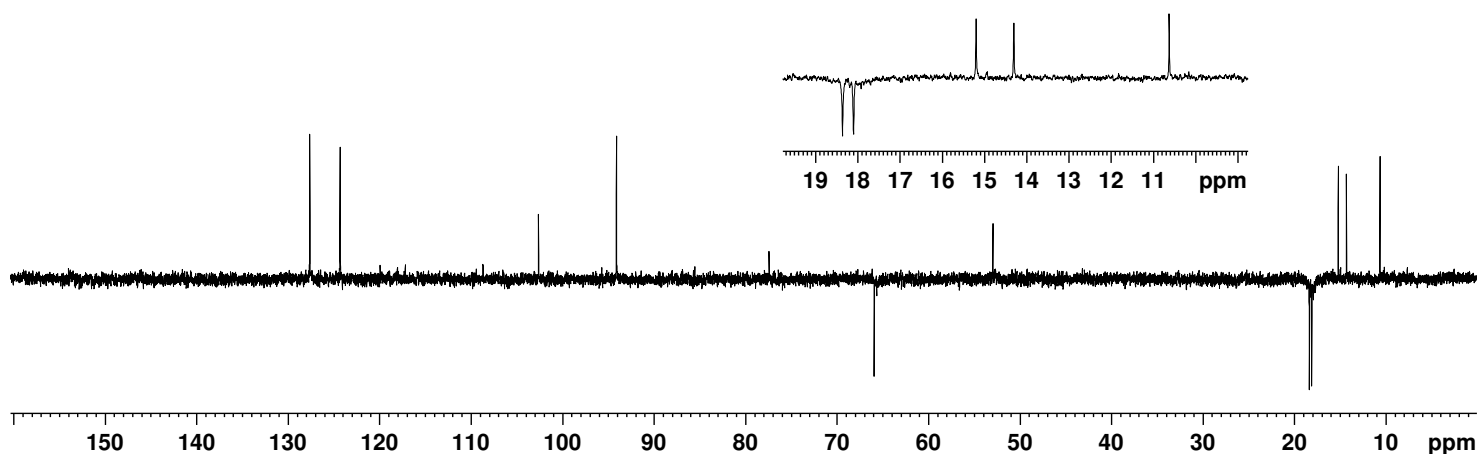

Figure S86. DEPT-135 NMR spectrum of  $7cH_2^{2+}$  in TFA- $CDCl_3$ .

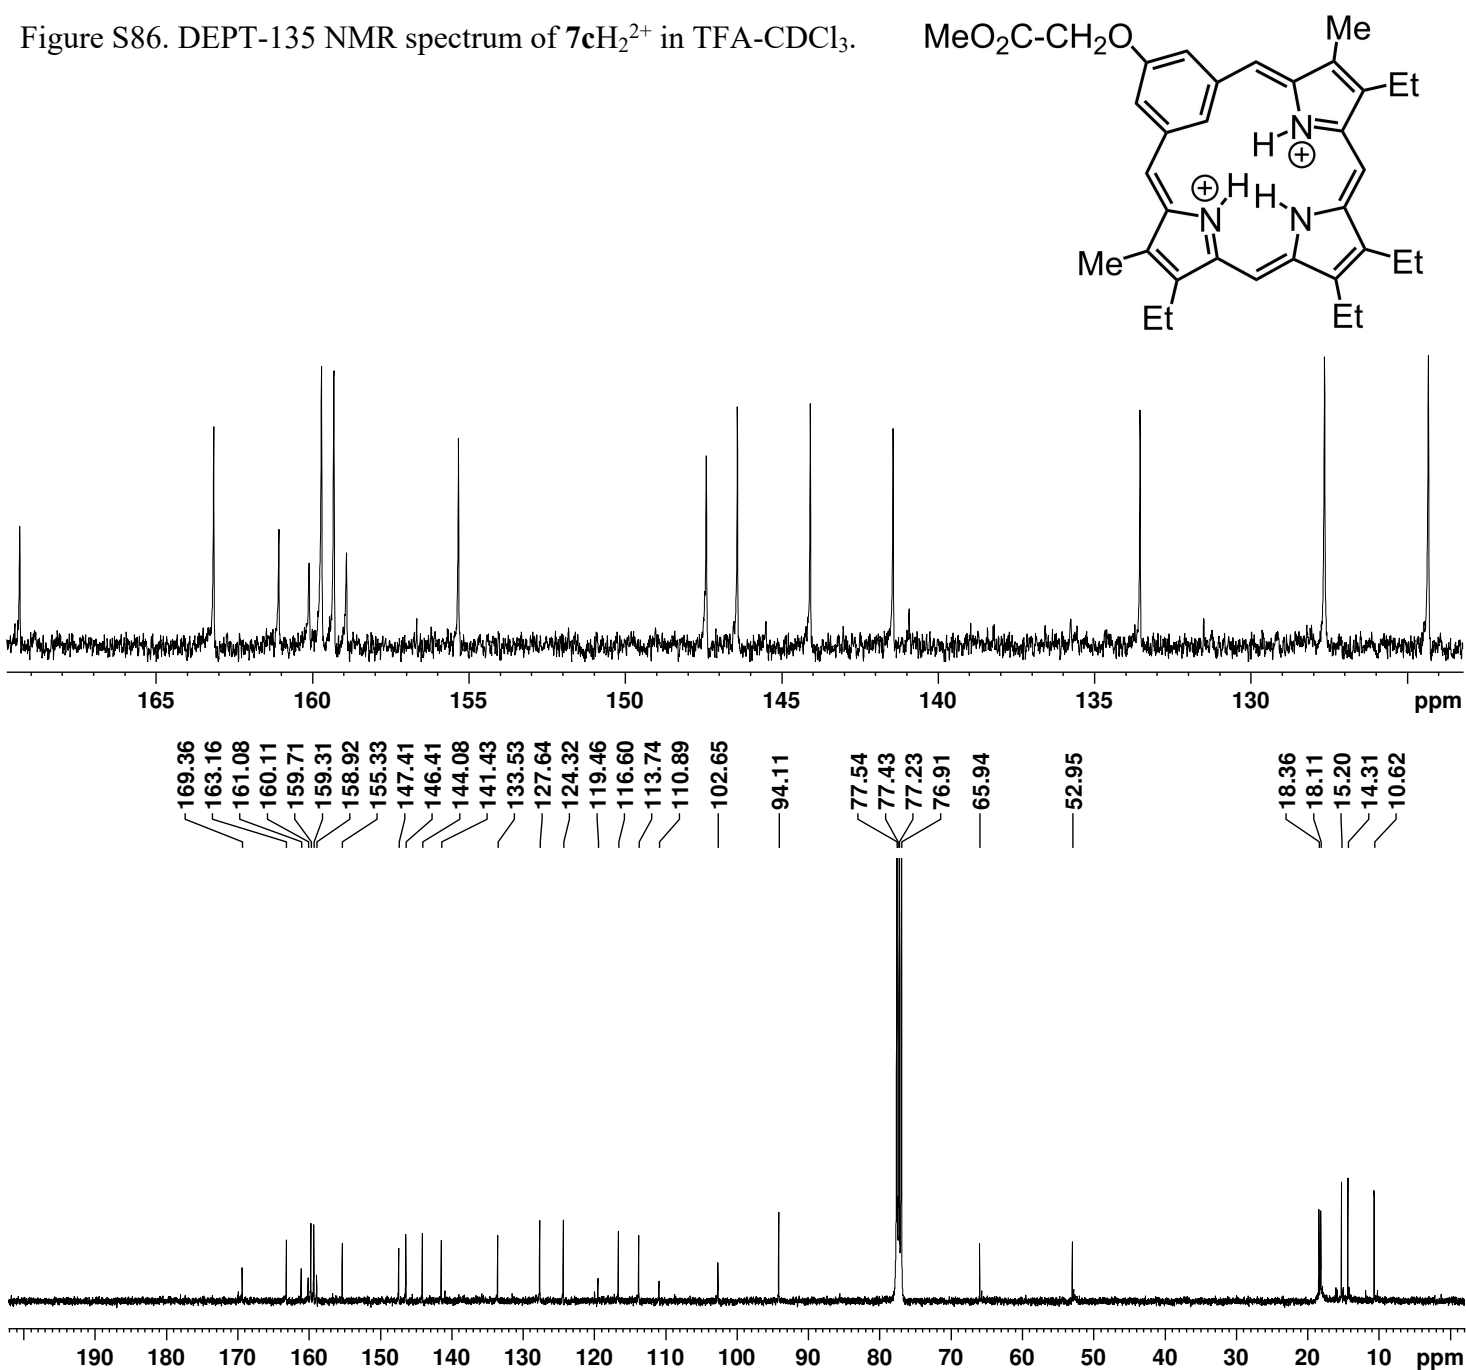

Figure S87. 125 MHz carbon-13 NMR spectrum of  $7cH_2^{2+}$  in TFA- $CDCl_3$ .



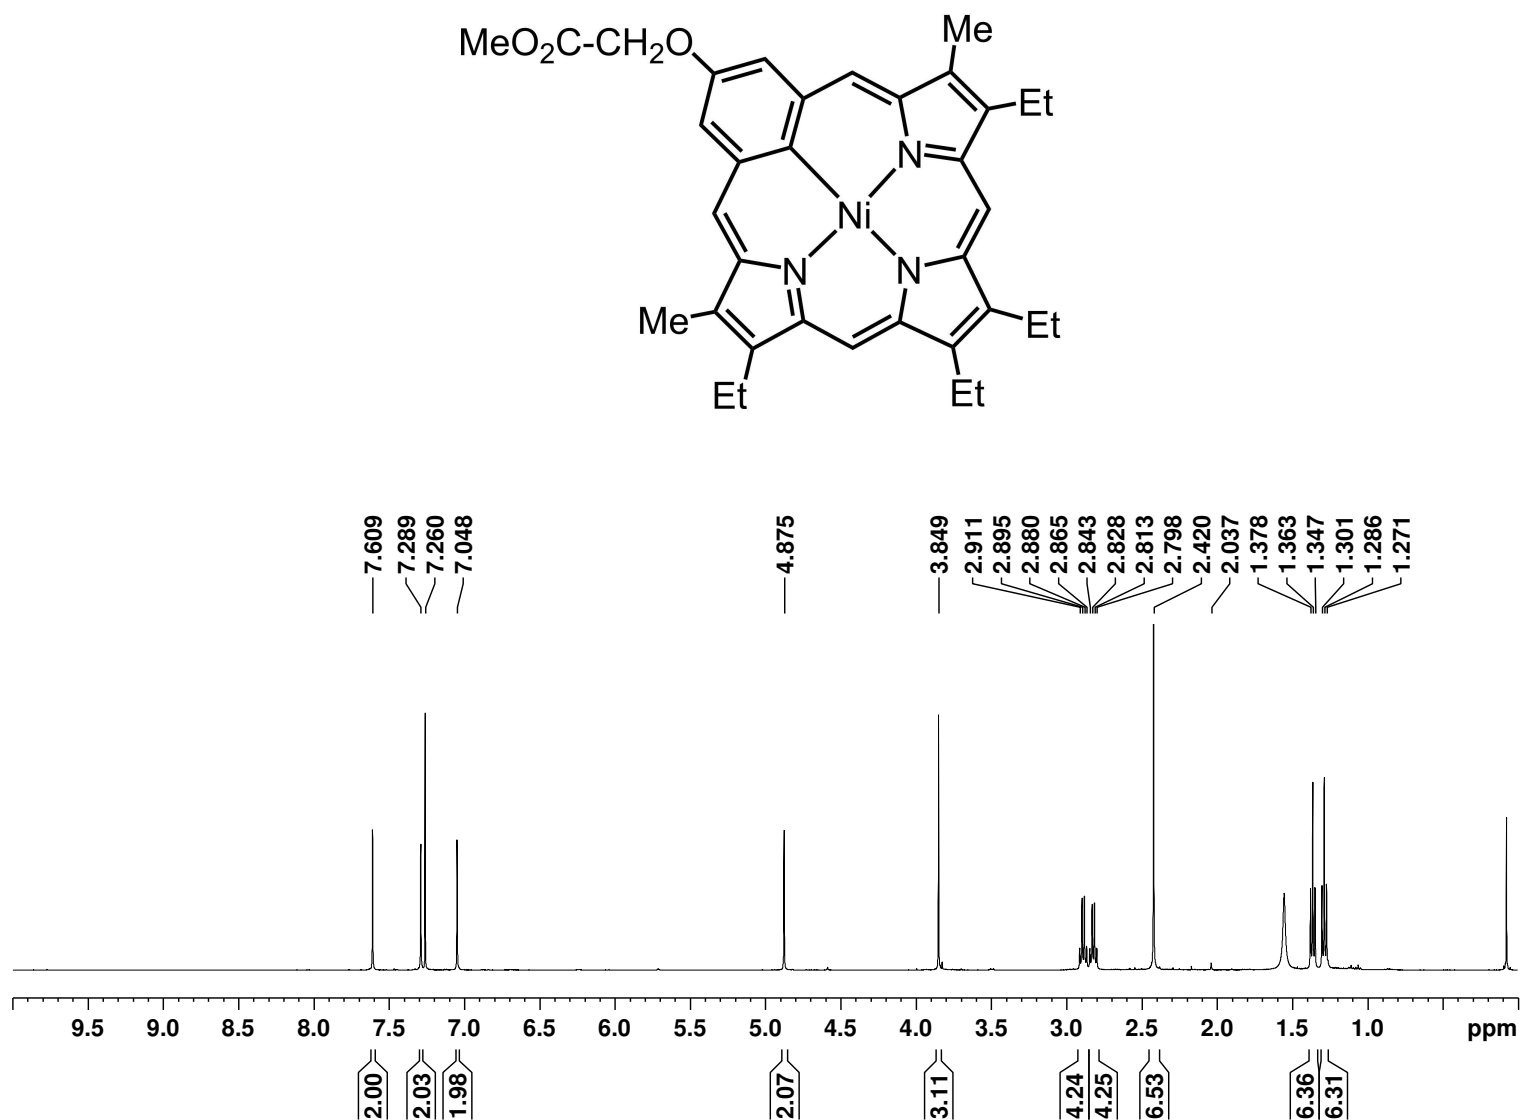

Figure S88. 500 MHz proton NMR spectrum of nickel(II) complex **7cNi** in  $\text{CDCl}_3$ .

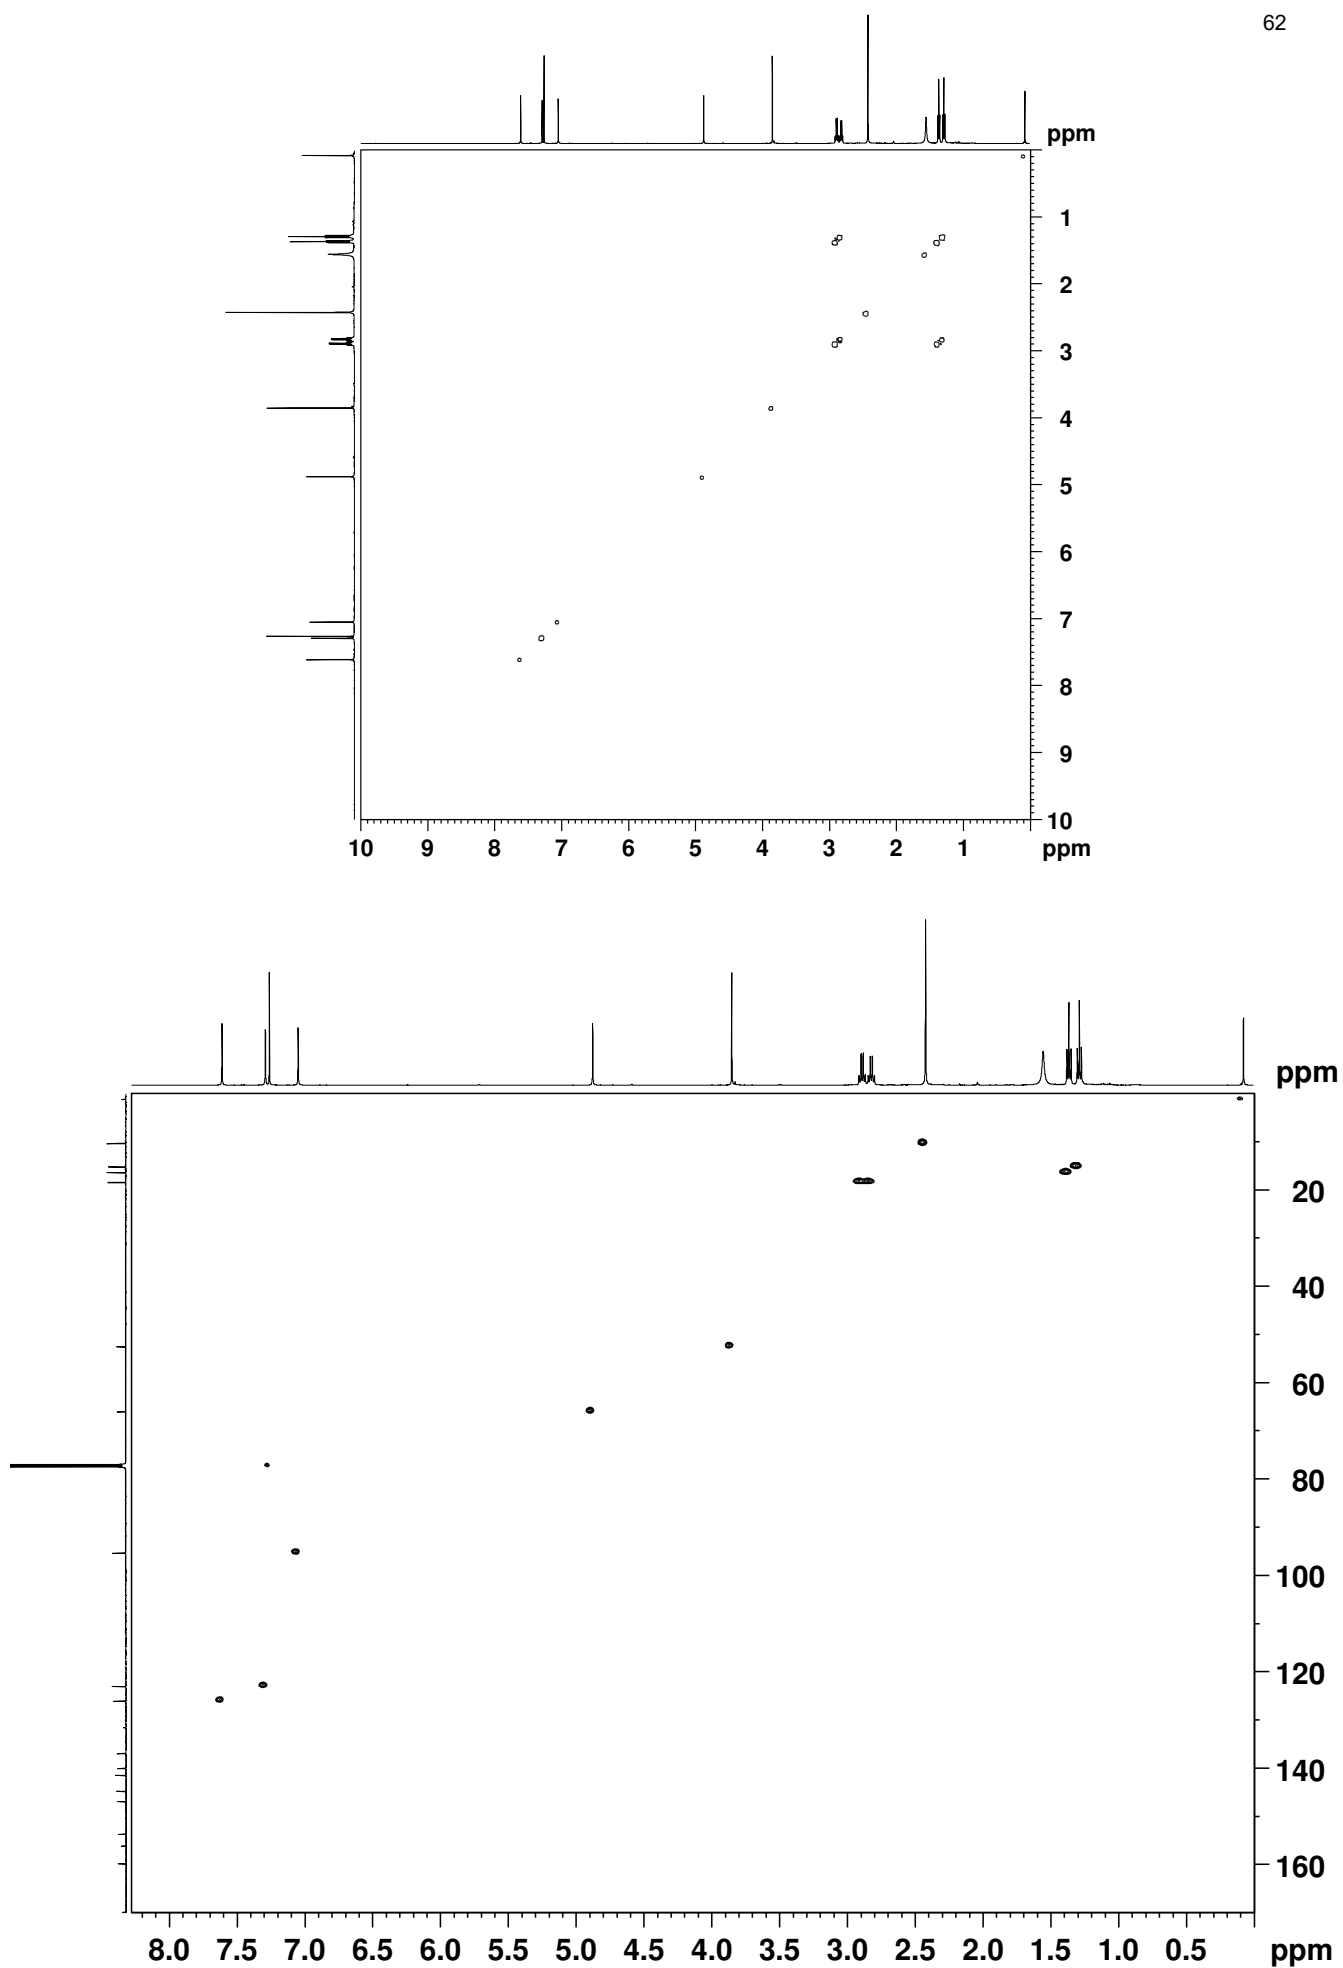

Figure S89.  $^1\text{H}$ - $^1\text{H}$  COSY (top) and HSQC (bottom) NMR spectra of **7cNi** in  $\text{CDCl}_3$ .

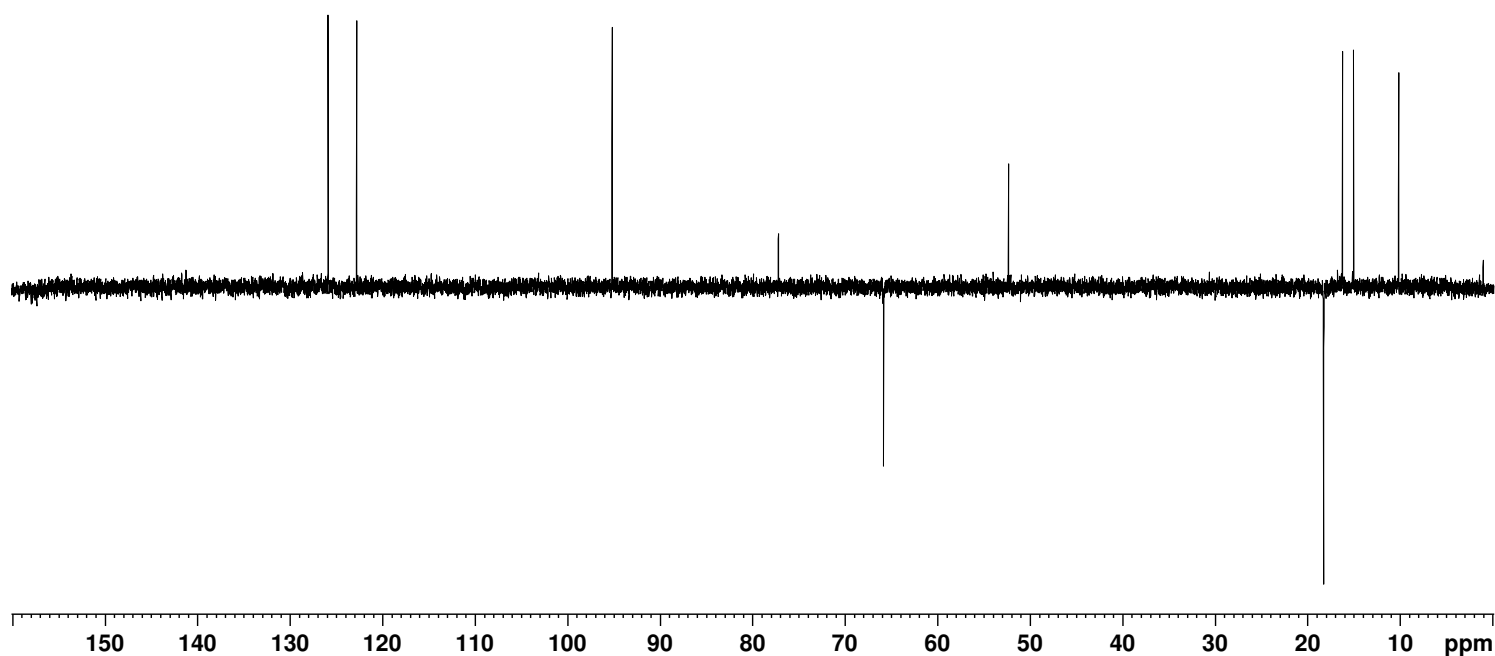

Figure S90. DEPT-135 NMR spectrum of **7cNi** in  $\text{CDCl}_3$ .

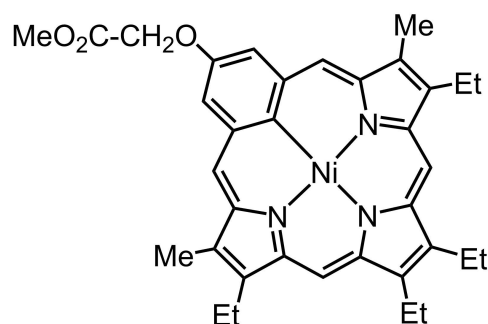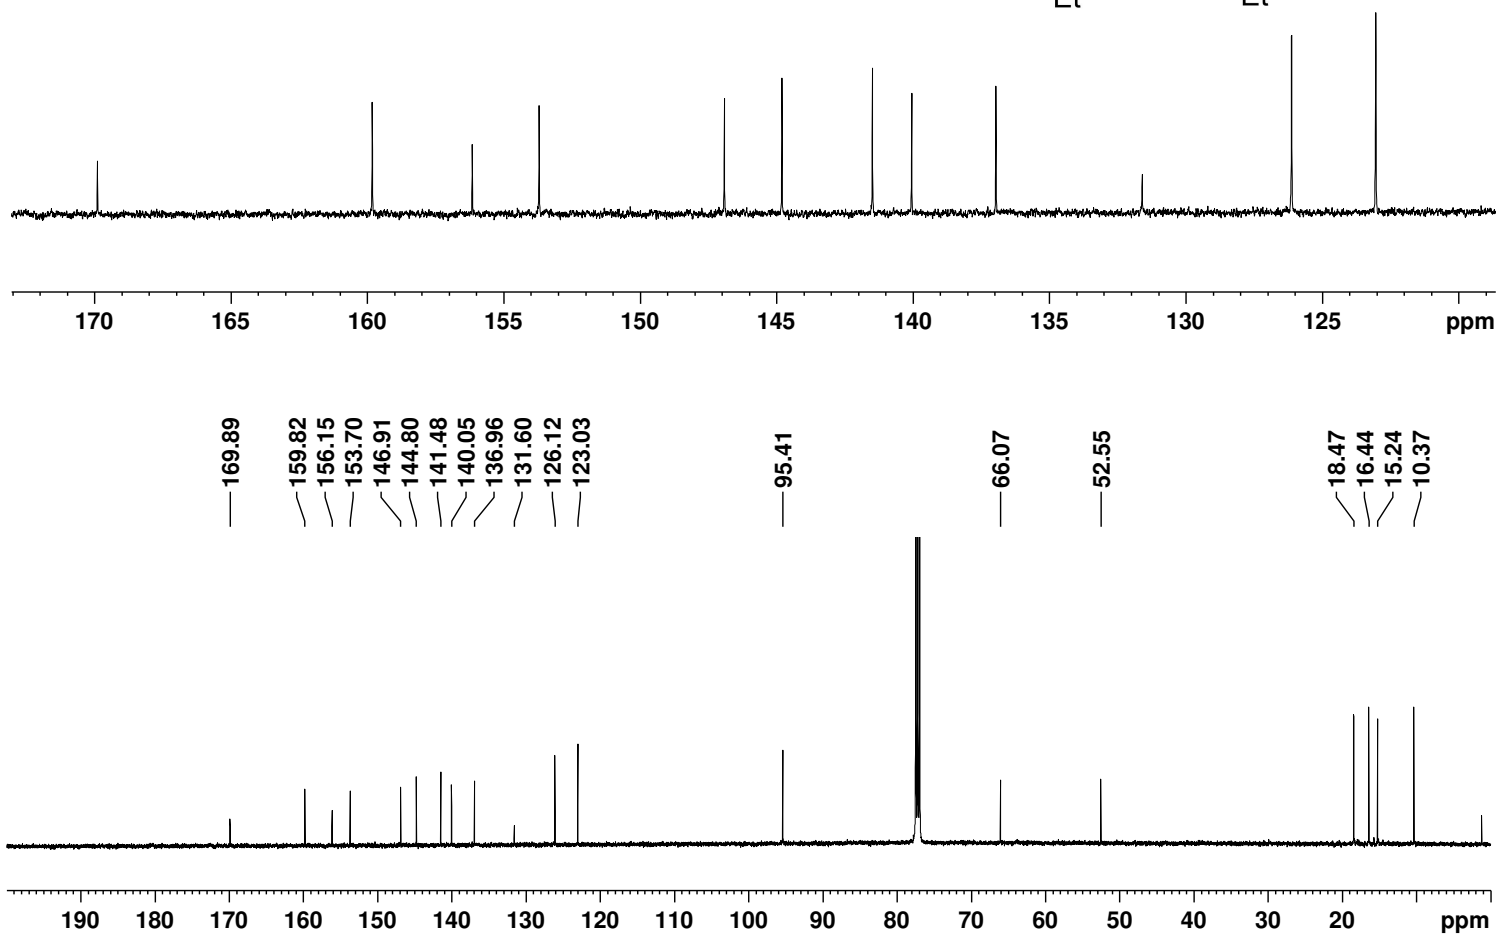

Figure S91. 125 MHz carbon-13 NMR spectrum of **7cNi** in  $\text{CDCl}_3$ .

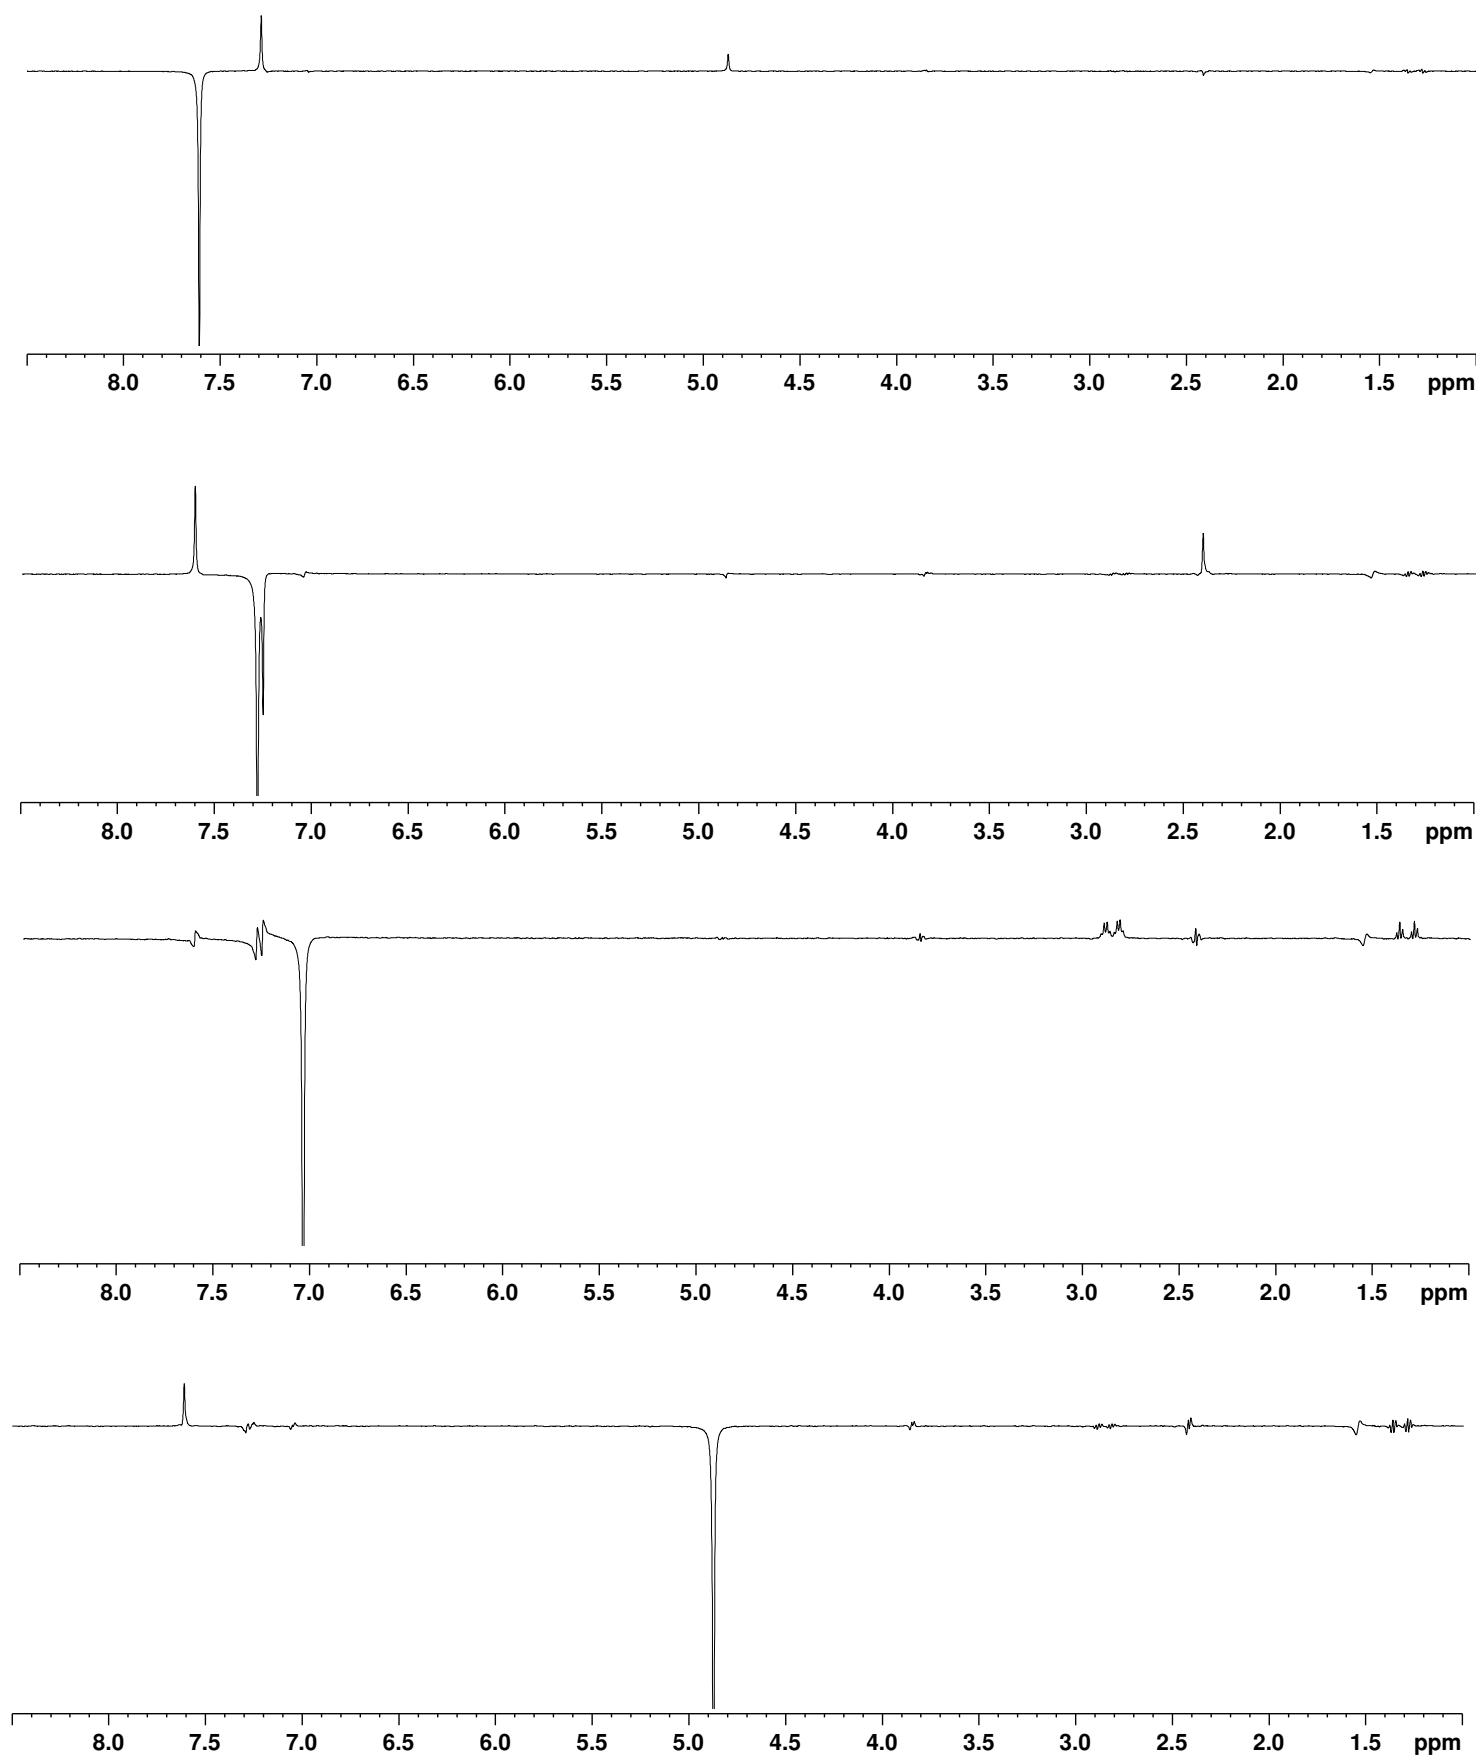

Figure S92. Selected nOe difference proton NMR spectra of **7cNi** in  $\text{CDCl}_3$ .

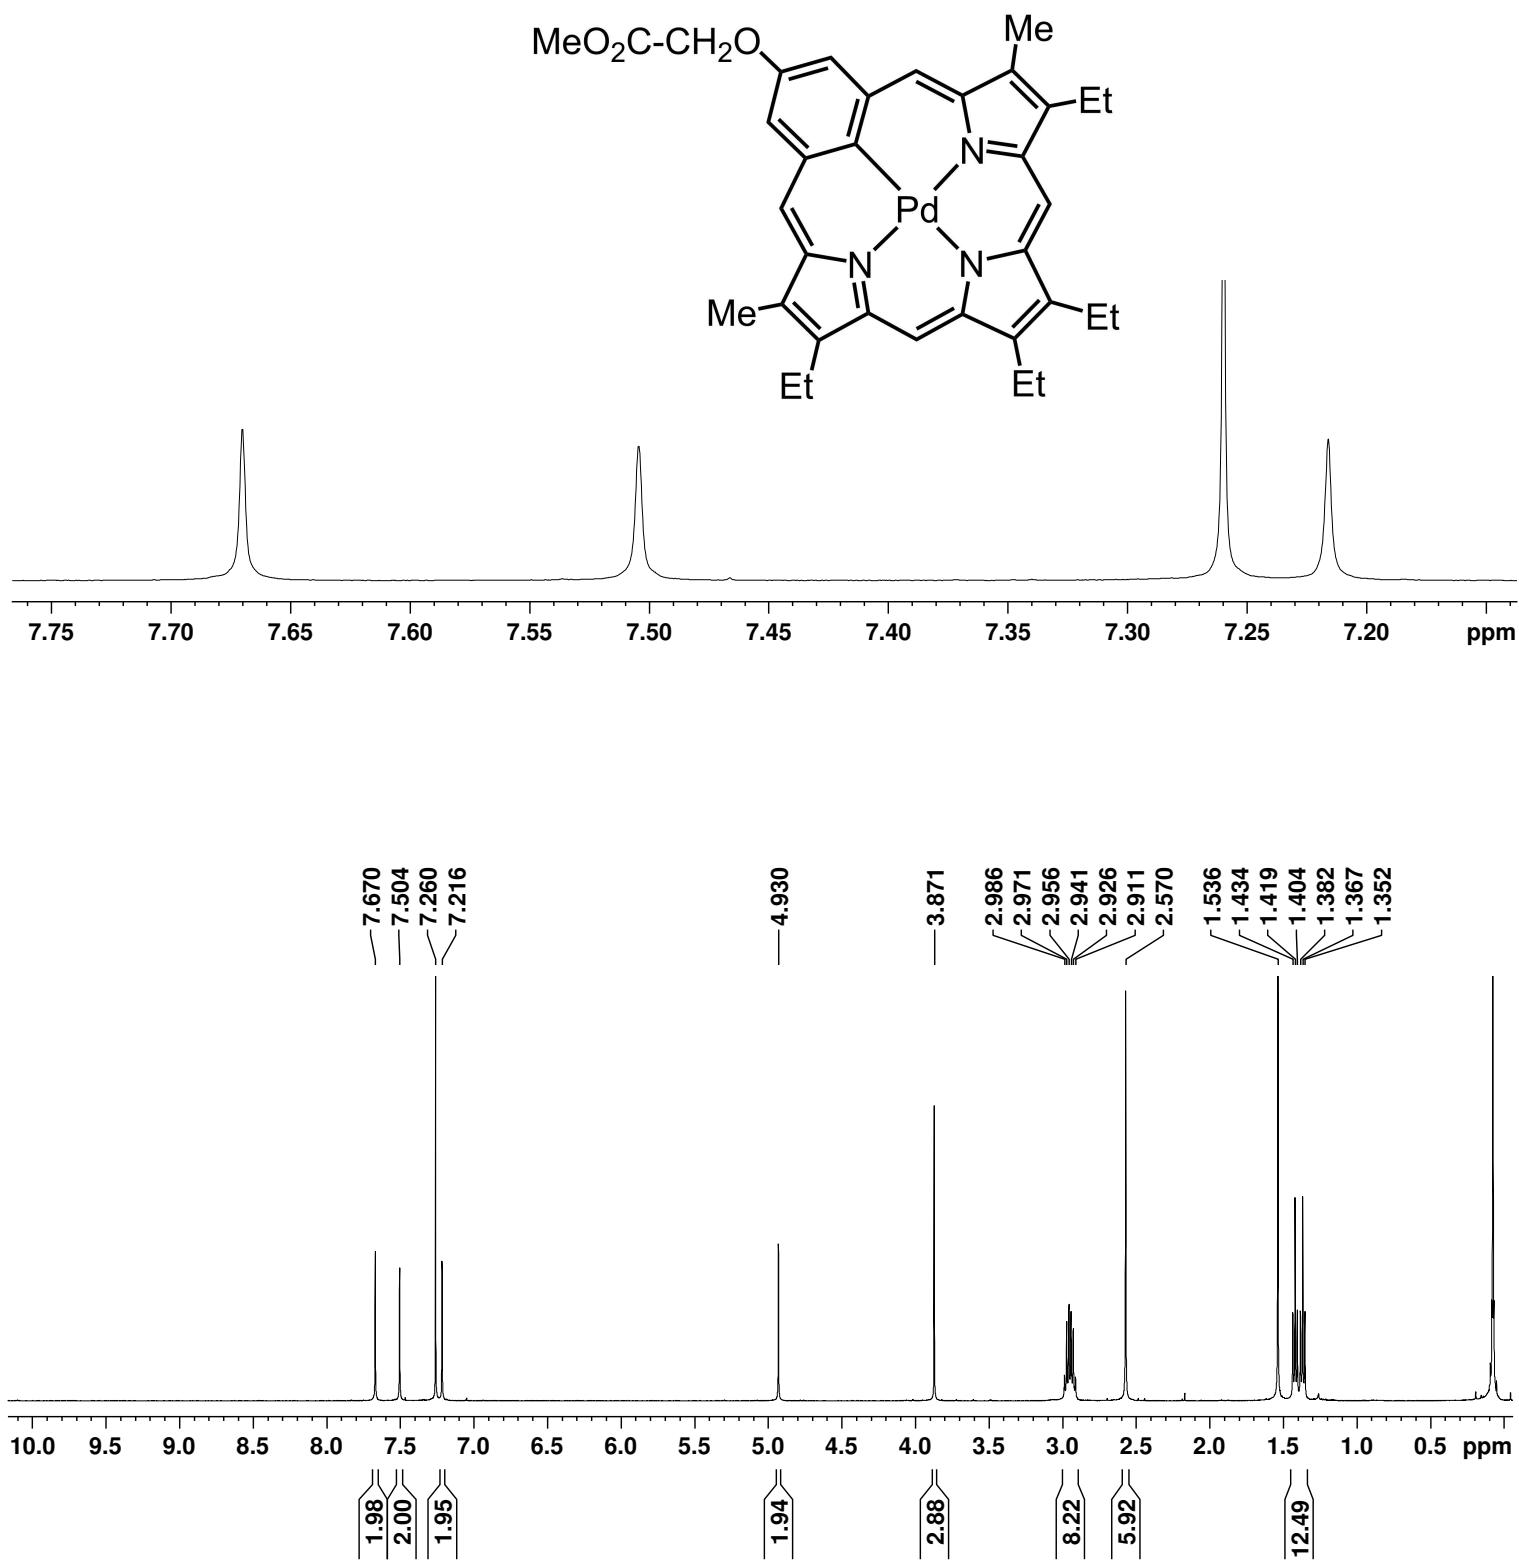

Figure S93. 500 MHz proton NMR spectrum of palladium(II) complex **7cPd** in CDCl<sub>3</sub>.

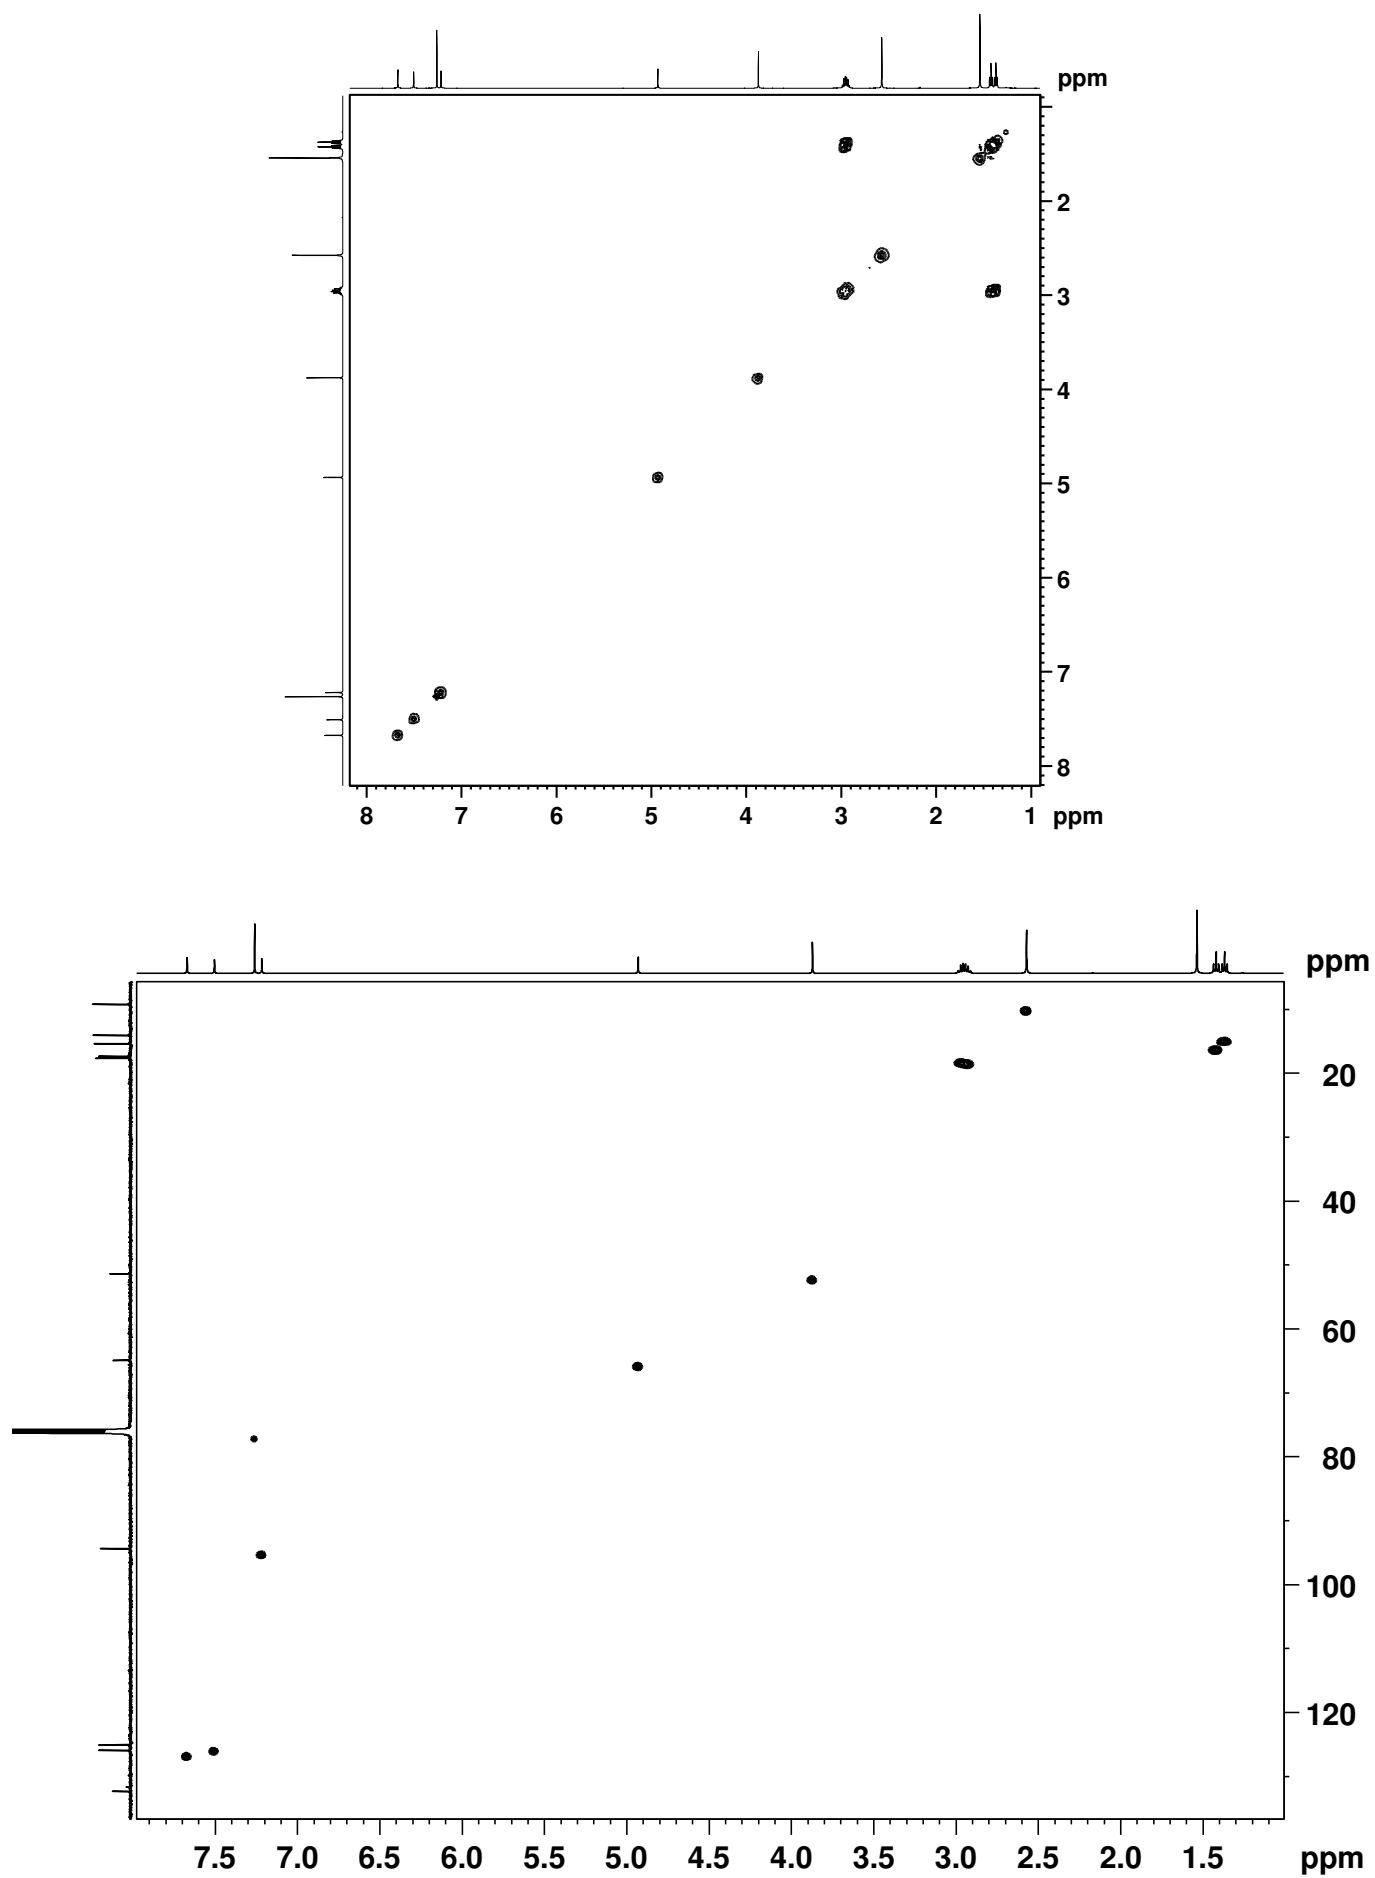

Figure S94.  $^1\text{H}$ - $^1\text{H}$  COSY (top) and HSQC (bottom) spectra of **7cPd** in  $\text{CDCl}_3$ .

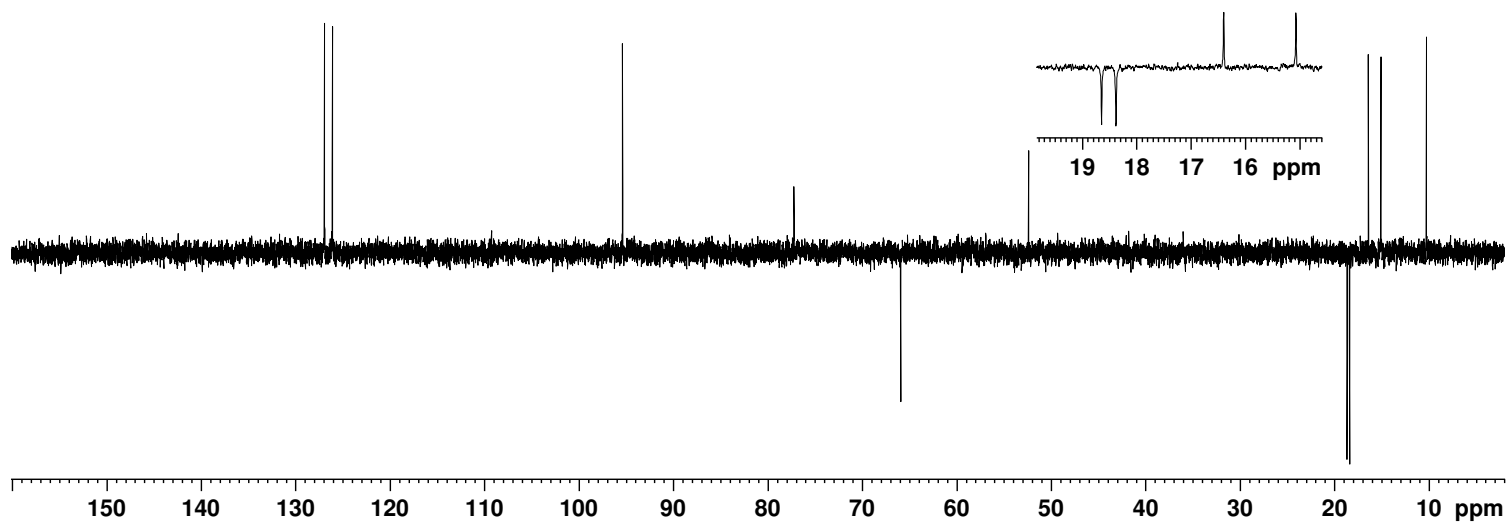

Figure S95. DEPT-135 NMR spectrum of **7cPd** in  $\text{CDCl}_3$ .

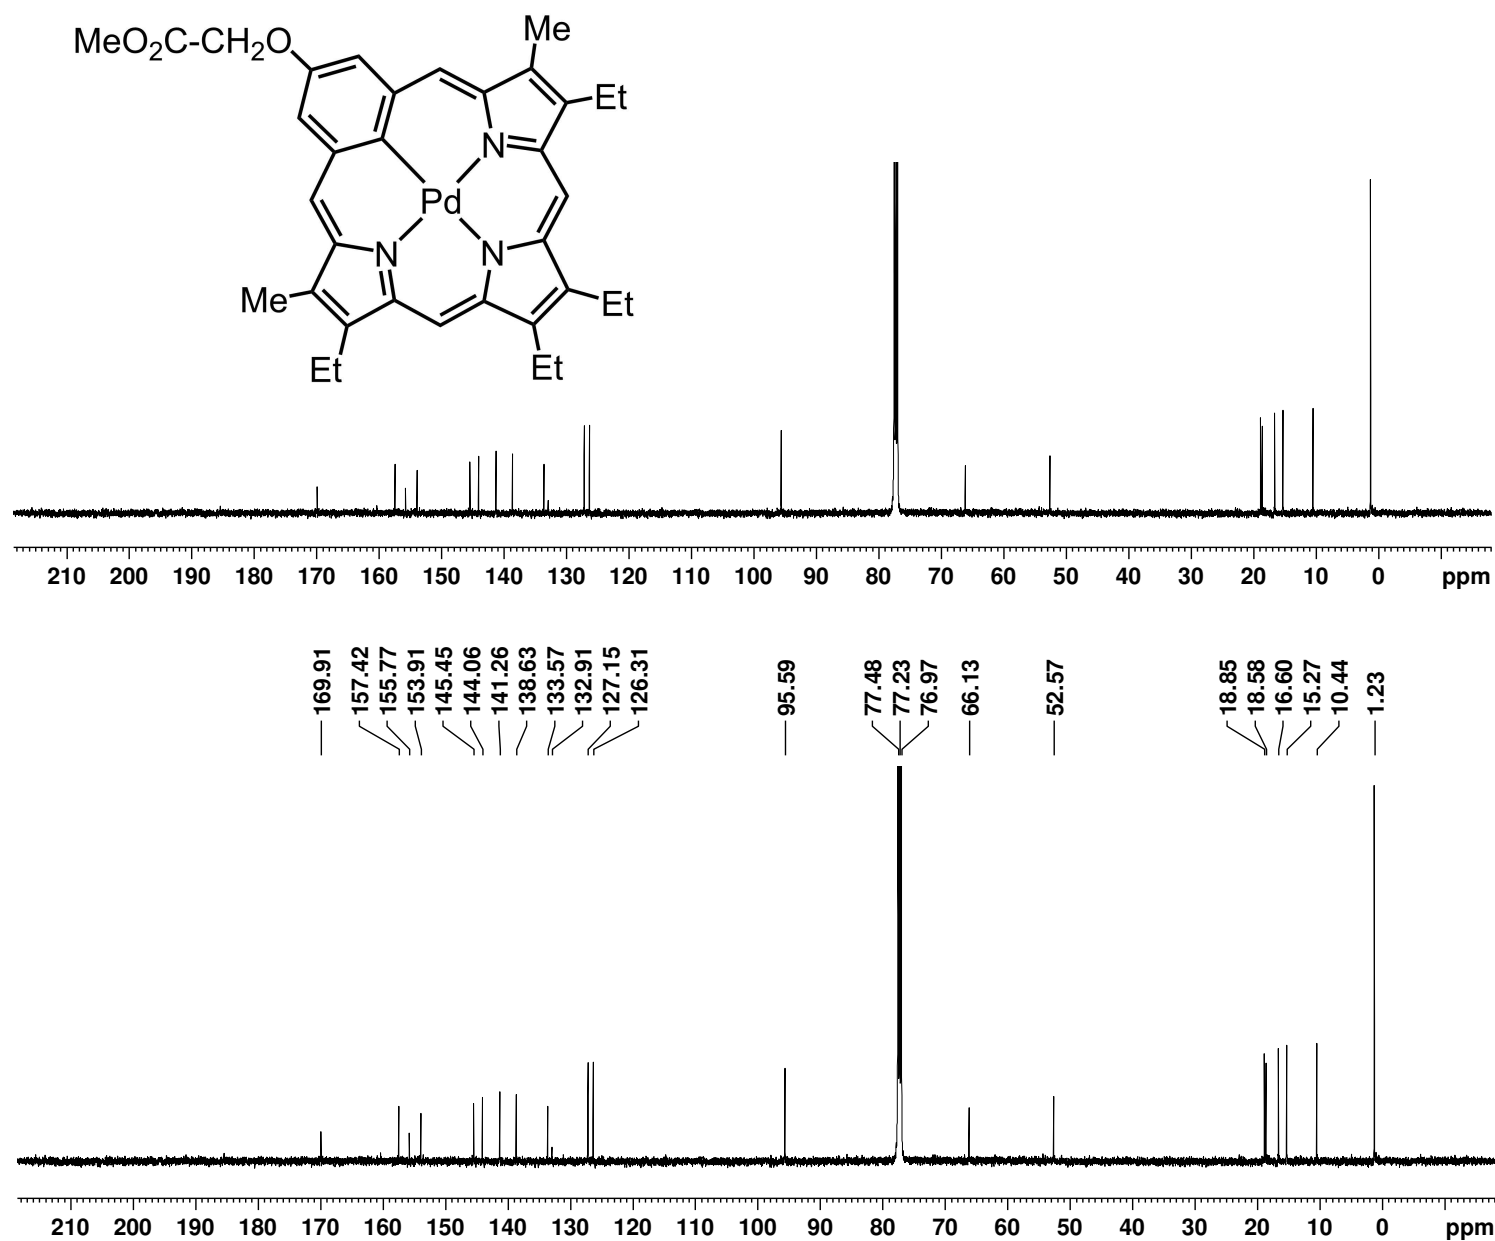

Figure S96. 125 MHz carbon-13 NMR spectrum of **7cPd** in  $\text{CDCl}_3$ .

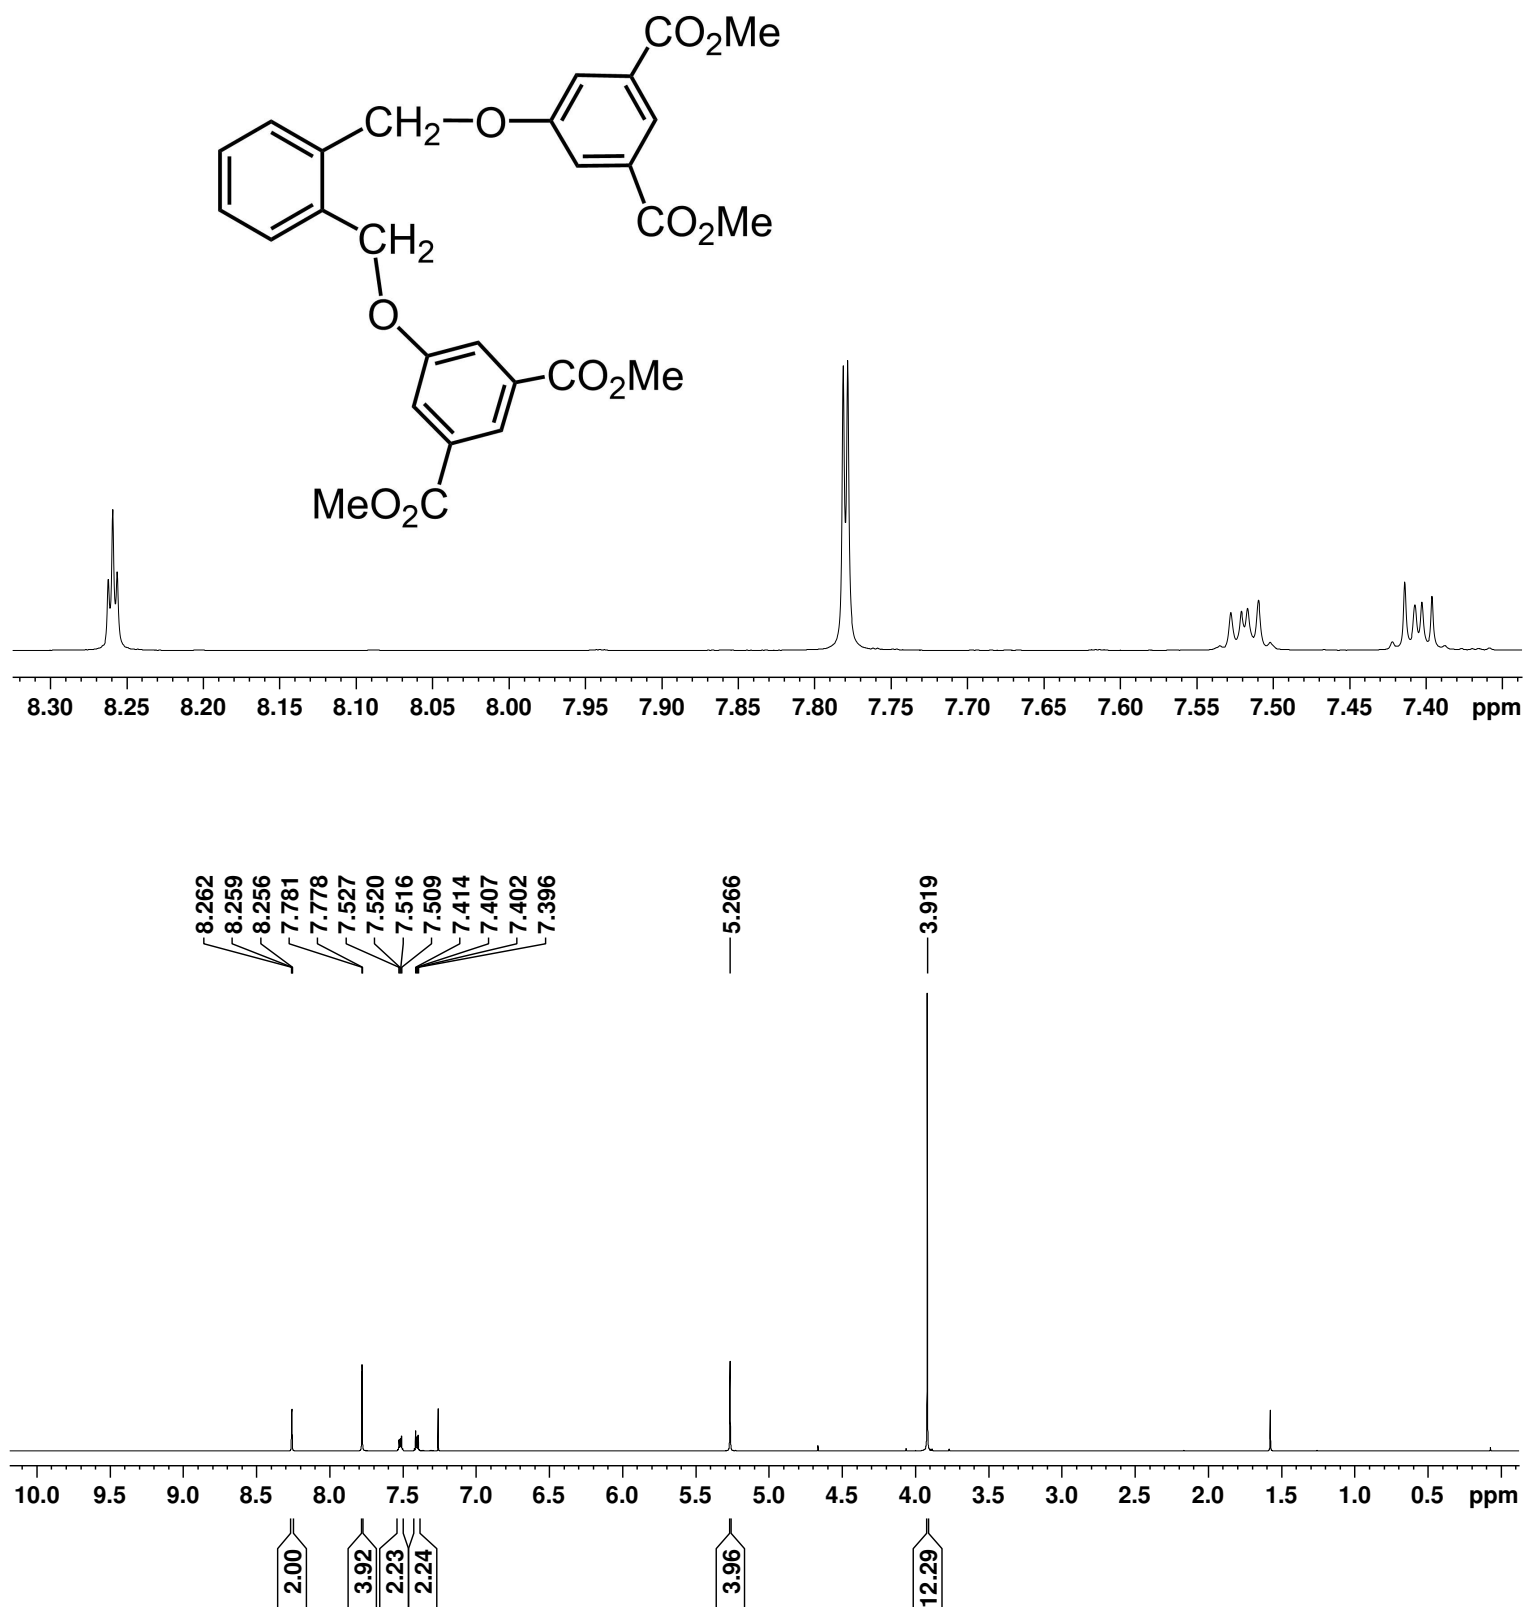

Figure S97. 500 MHz proton NMR spectrum of tetraester **16a** in CDCl<sub>3</sub>.



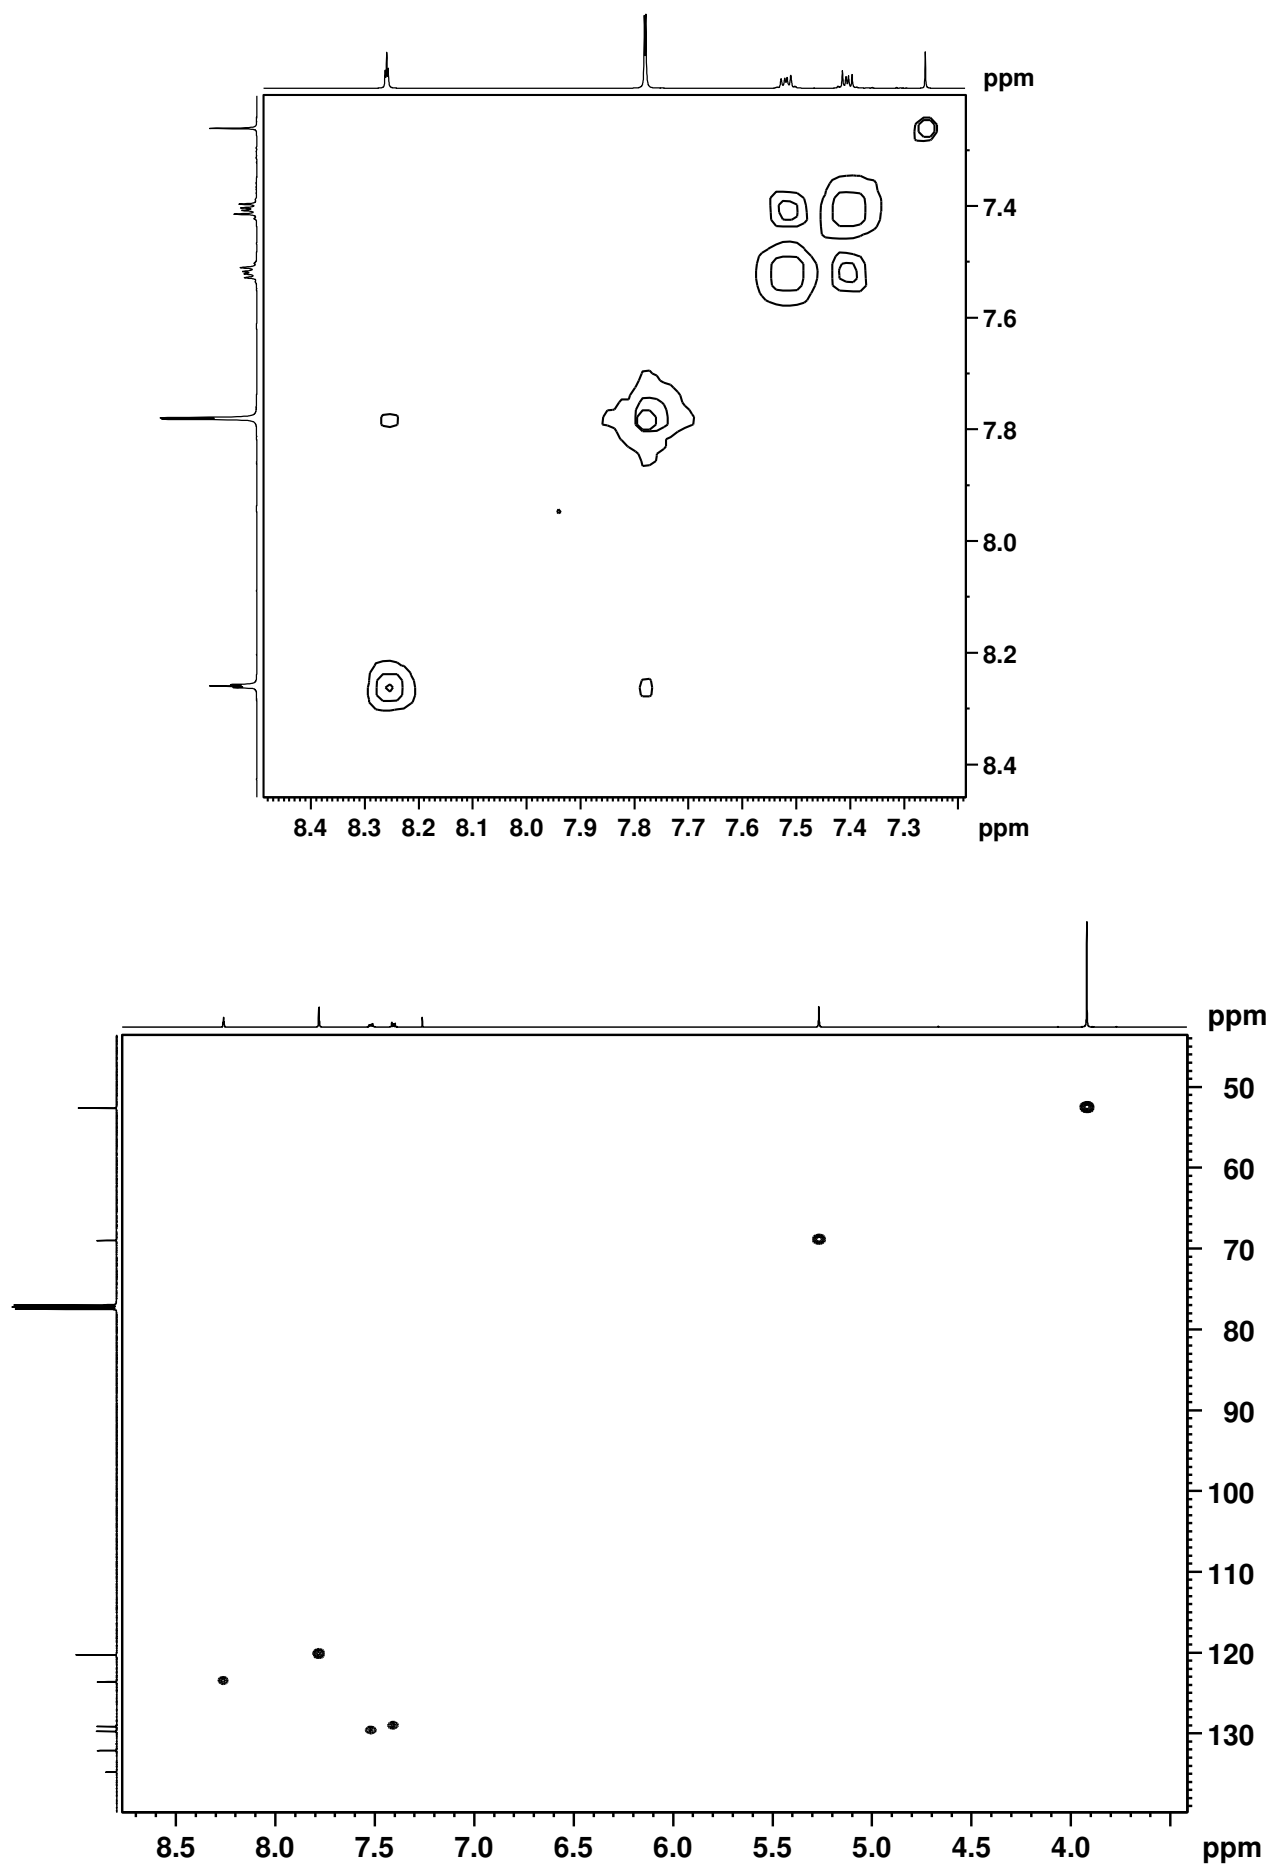

Figure S98.  $^1\text{H}$ - $^1\text{H}$  COSY and HSQC NMR spectra of **16a** in  $\text{CDCl}_3$ .

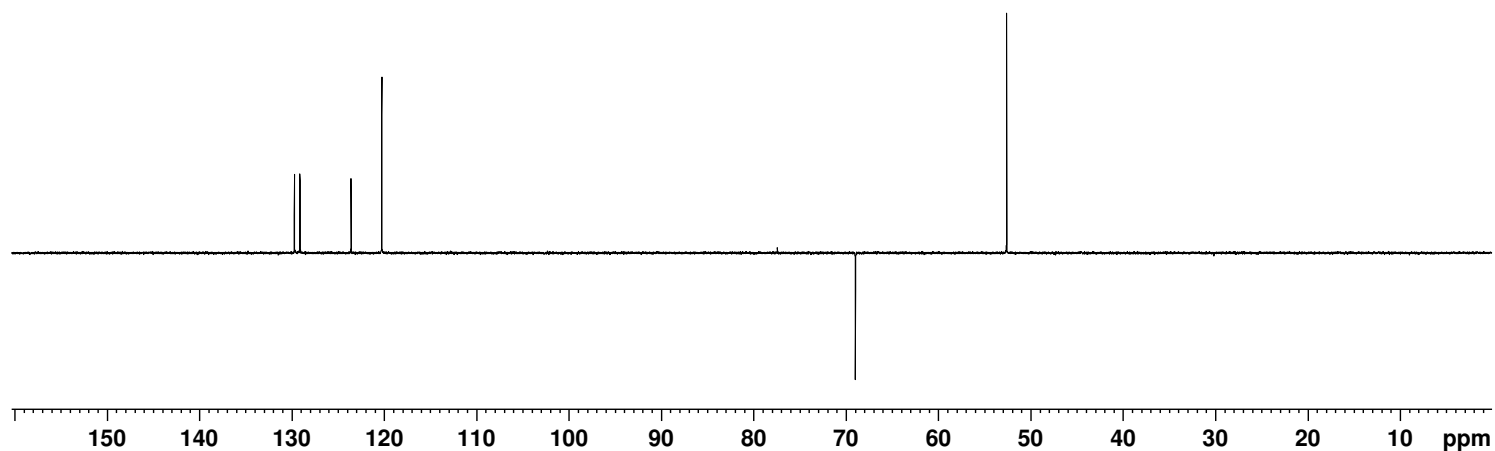

Figure S99. DEPT-135 NMR spectrum of **16a** in  $\text{CDCl}_3$ .

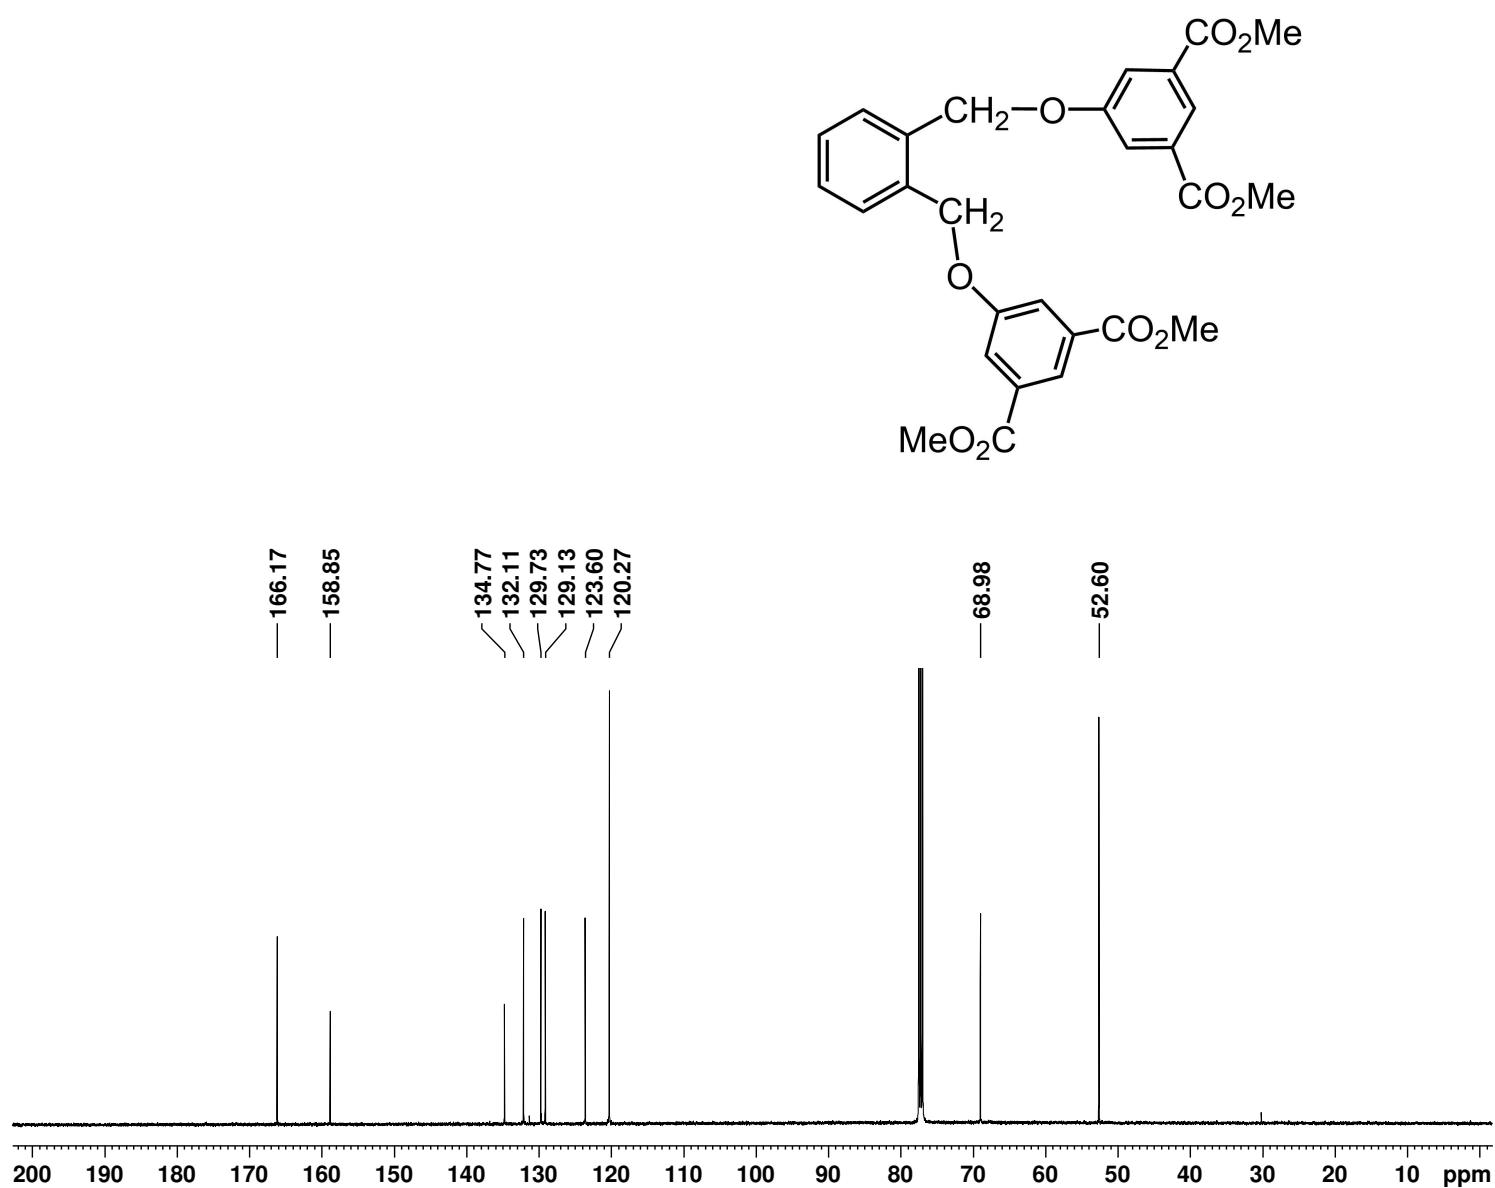

Figure S100. 125 MHz carbon-13 NMR spectrum of **16a** in  $\text{CDCl}_3$ .

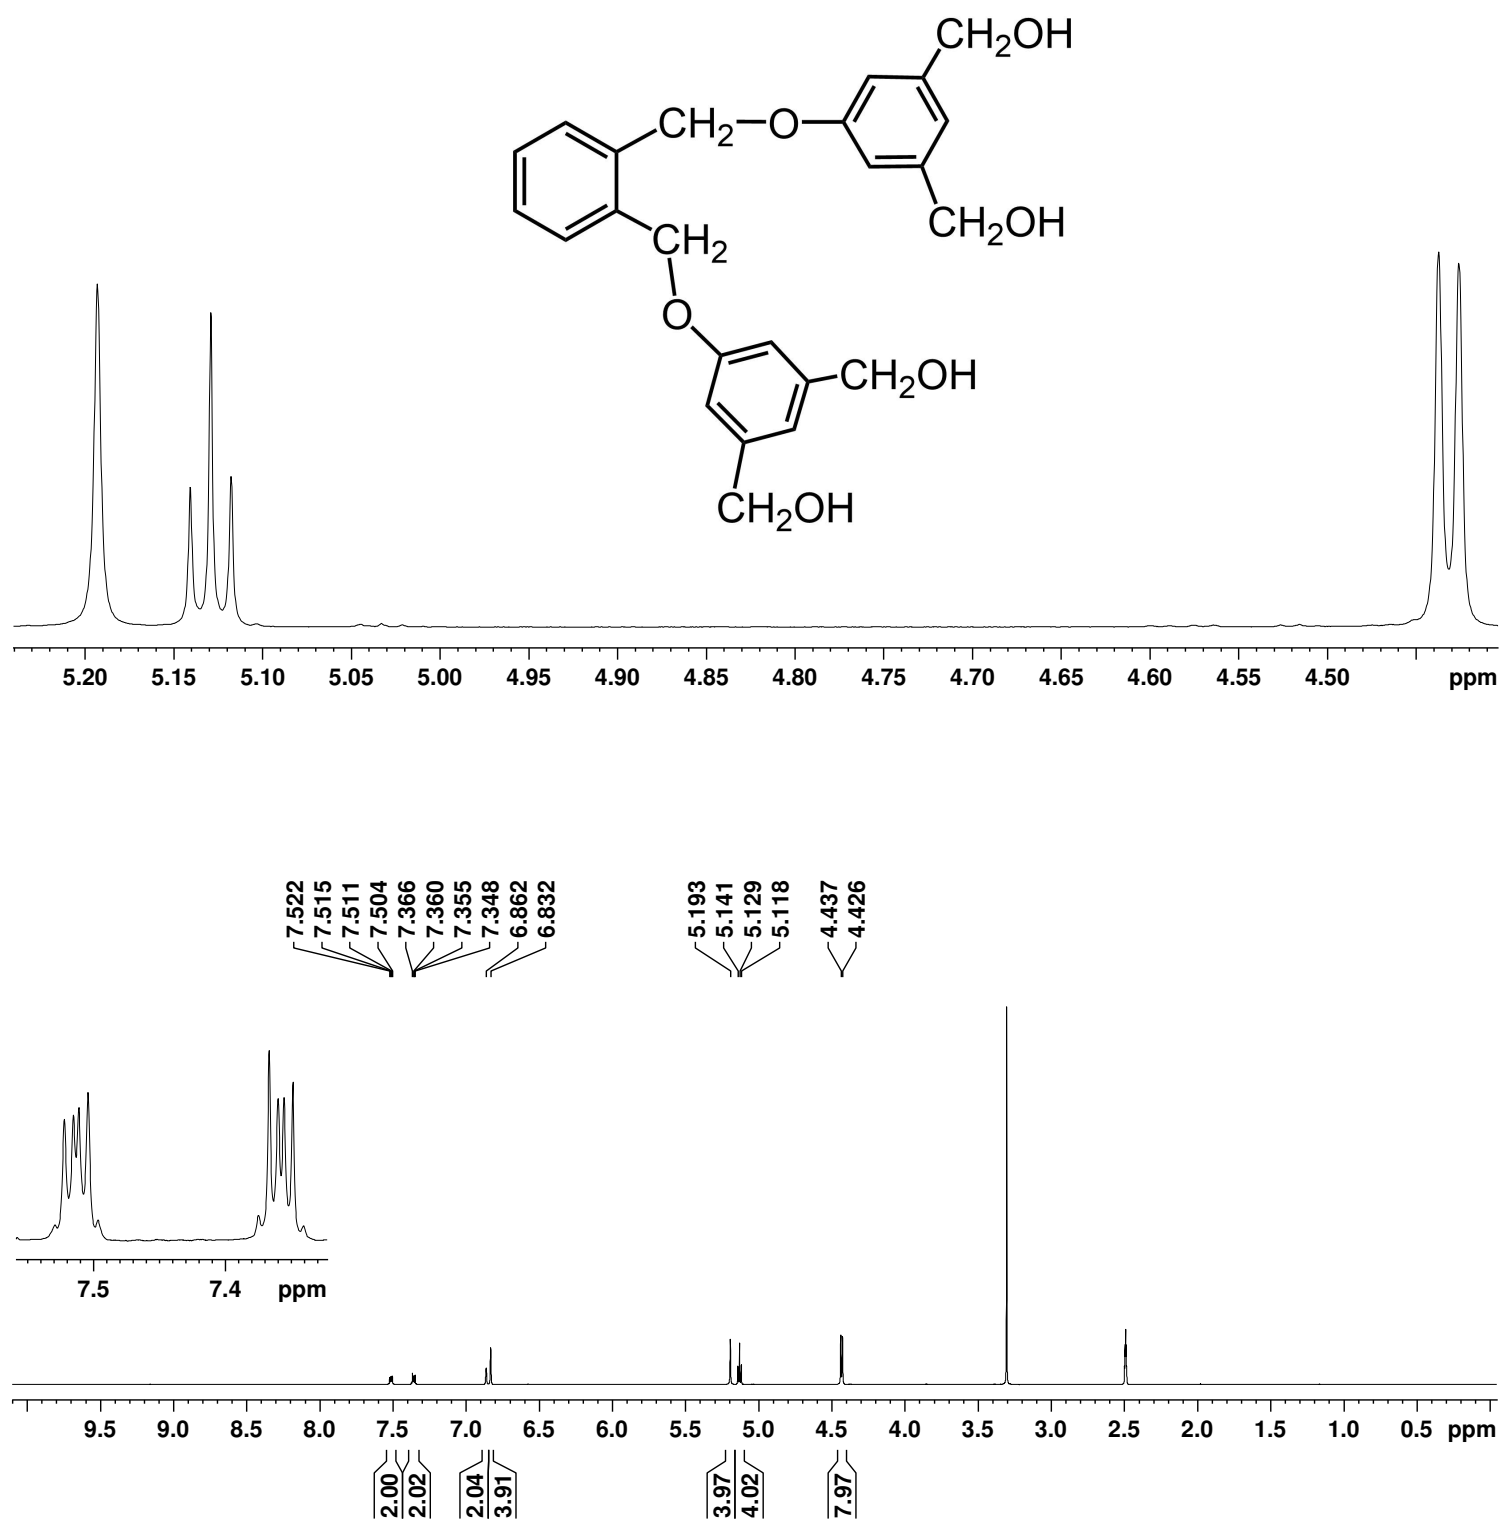

Figure S101. 500 MHz proton NMR spectrum of tetraalcohol **17a** in DMSO-*d*<sub>6</sub>.

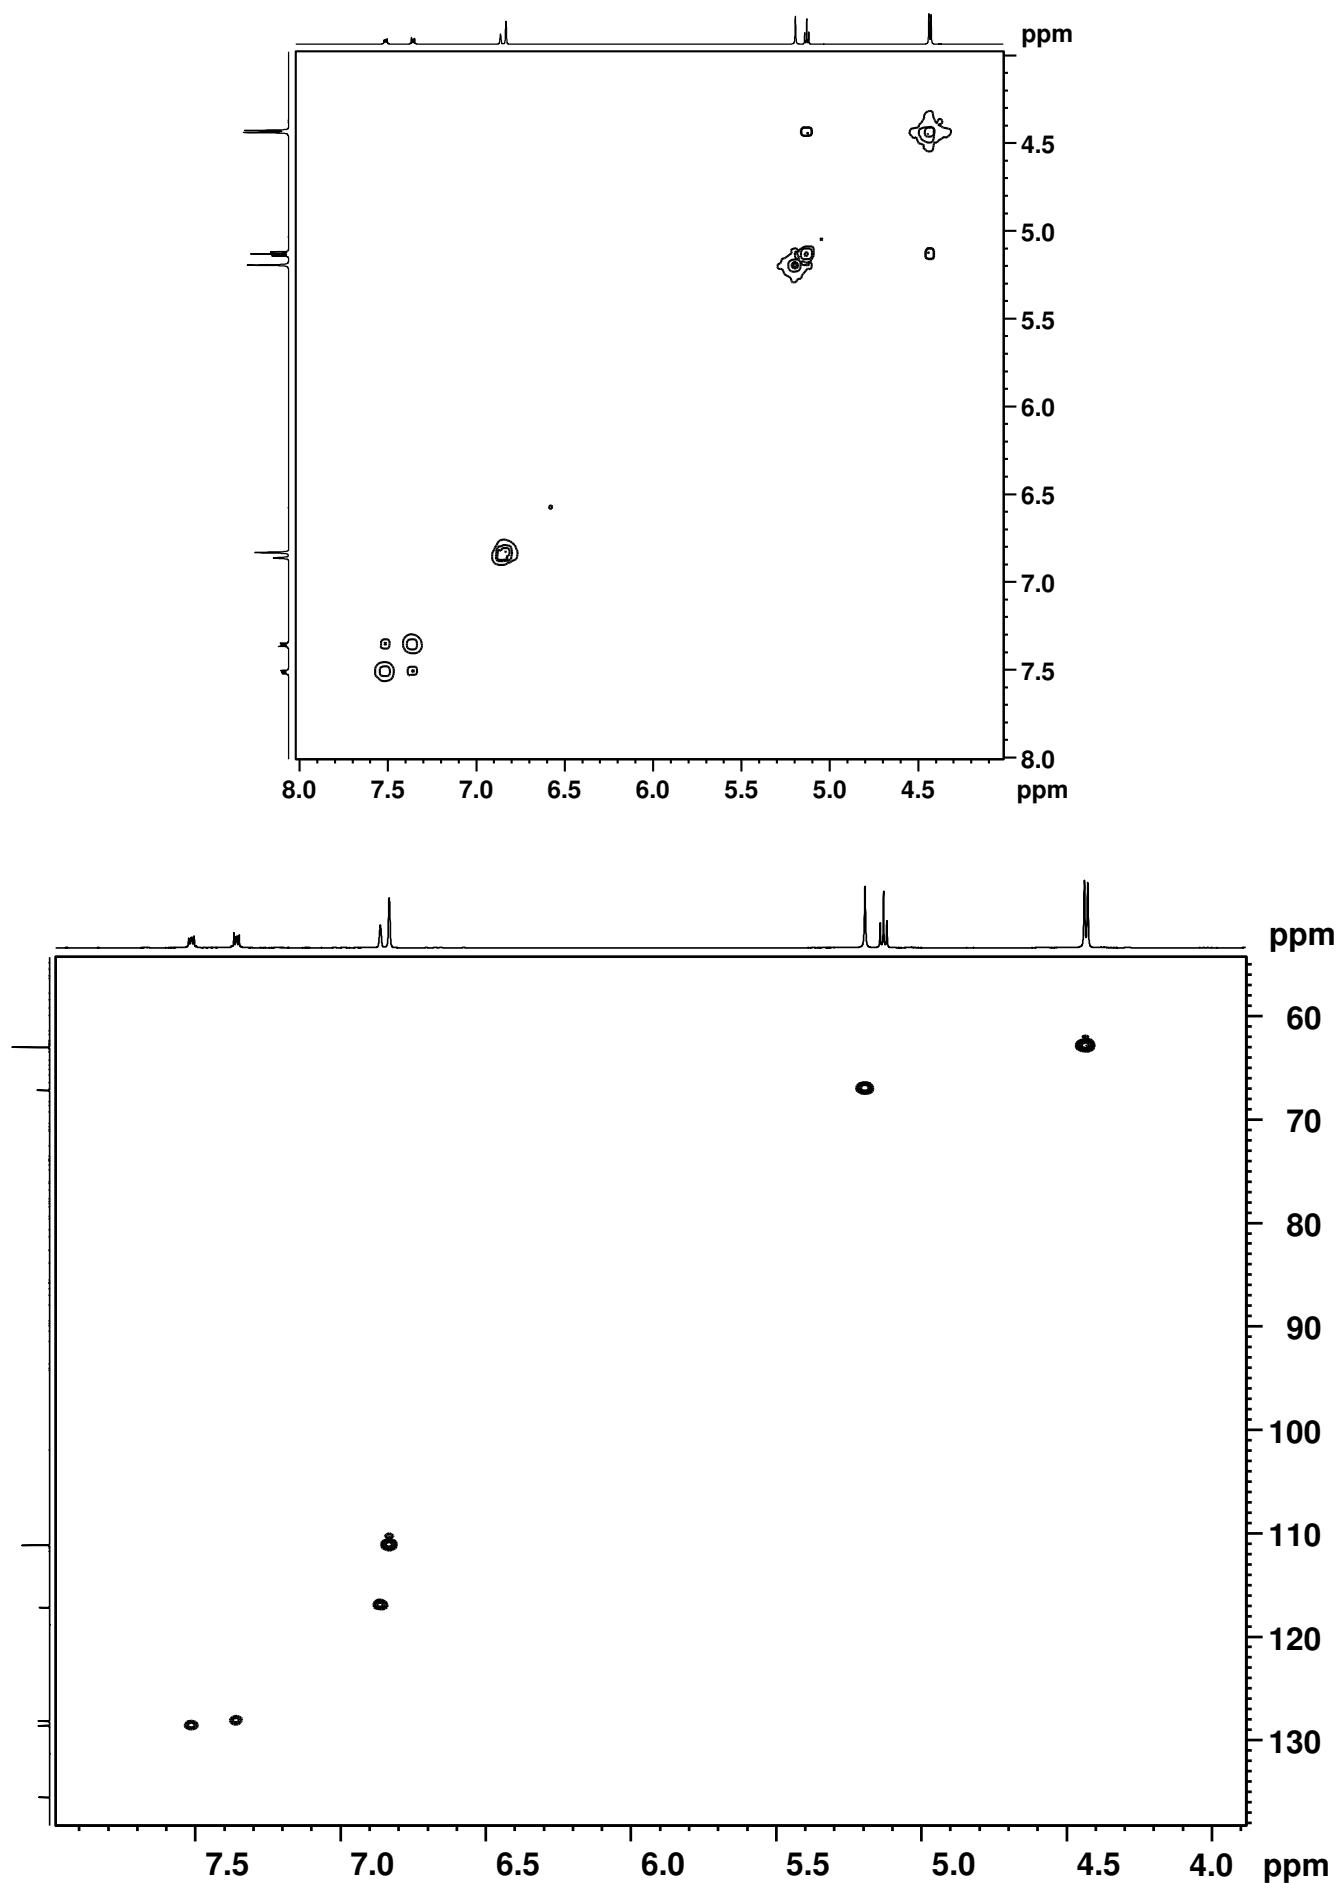

Figure S102.  $^1\text{H}$ - $^1\text{H}$  COSY (top) and HSQC (bottom) NMR spectra of **17a** in DMSO- $d_6$ .

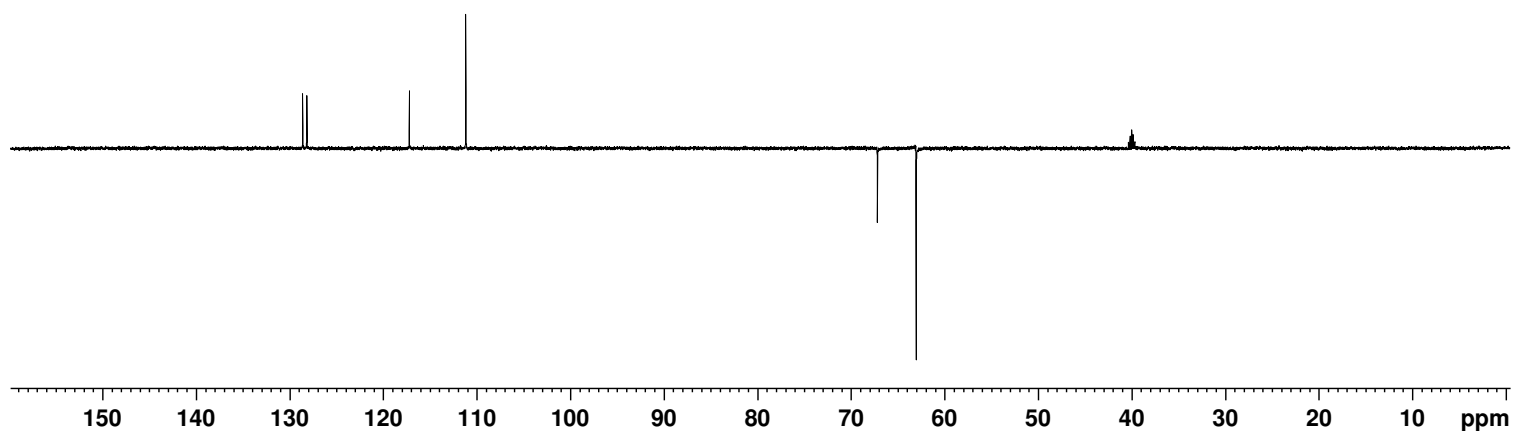

Figure 103. DEPT-135 NMR spectrum of **17a** in DMSO- $d_6$ .

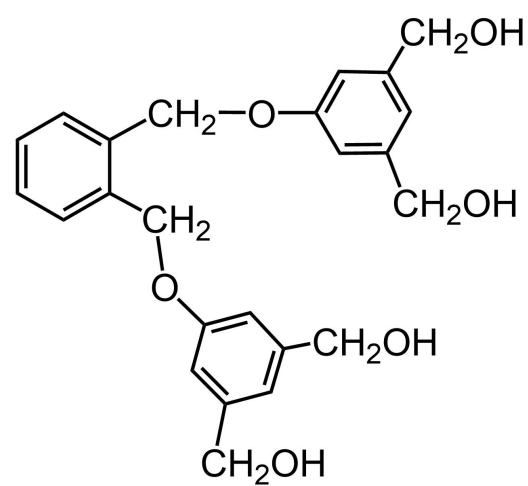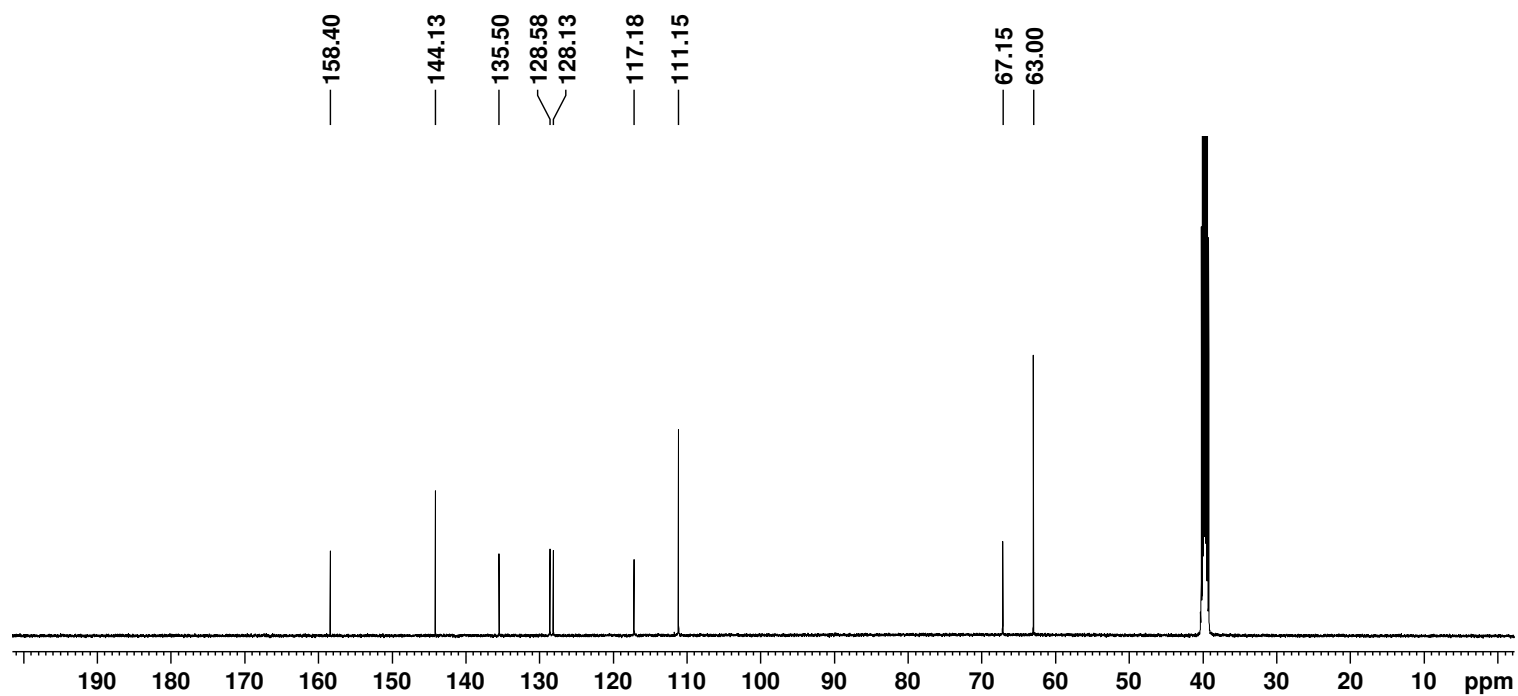

Figure S104. 125 MHz carbon-13 NMR spectrum of **17a** in DMSO- $d_6$ .

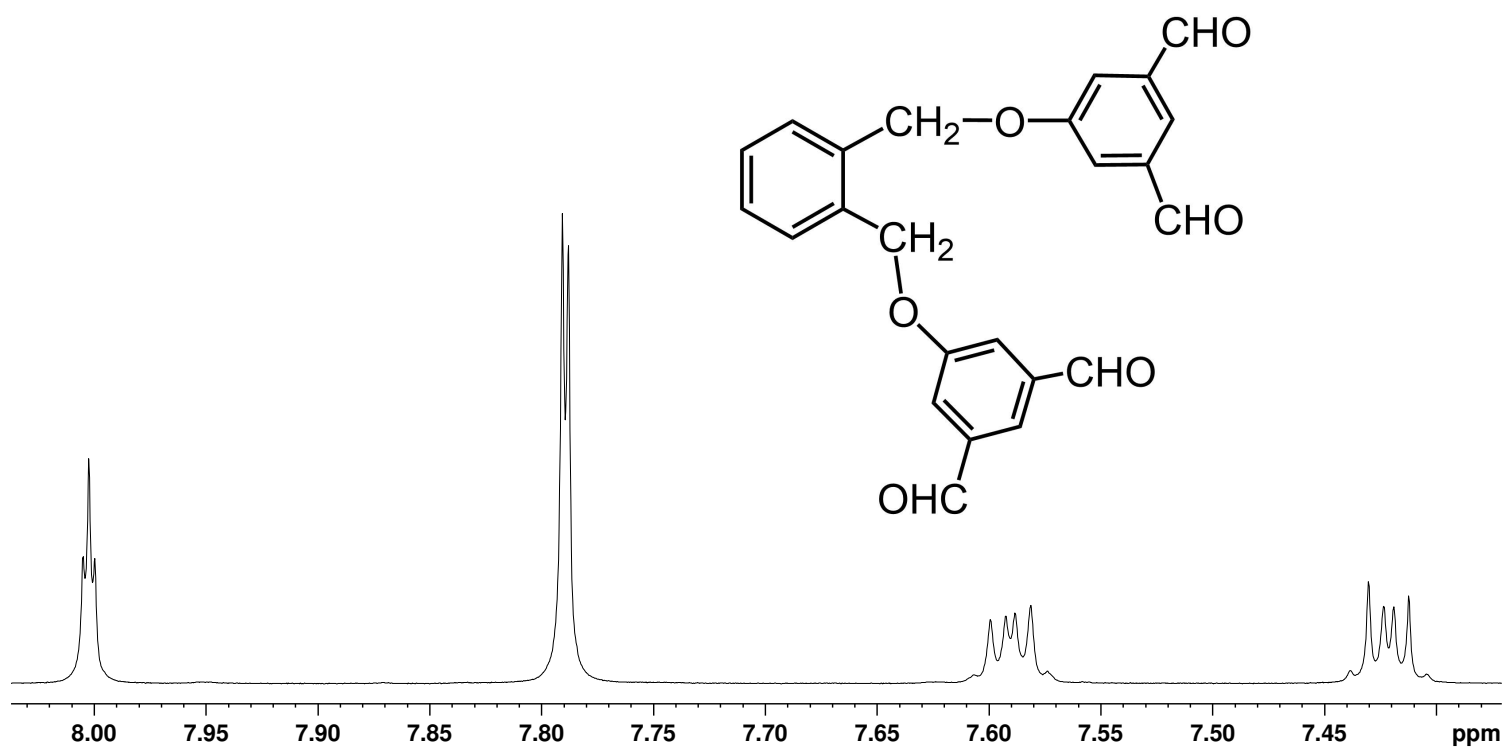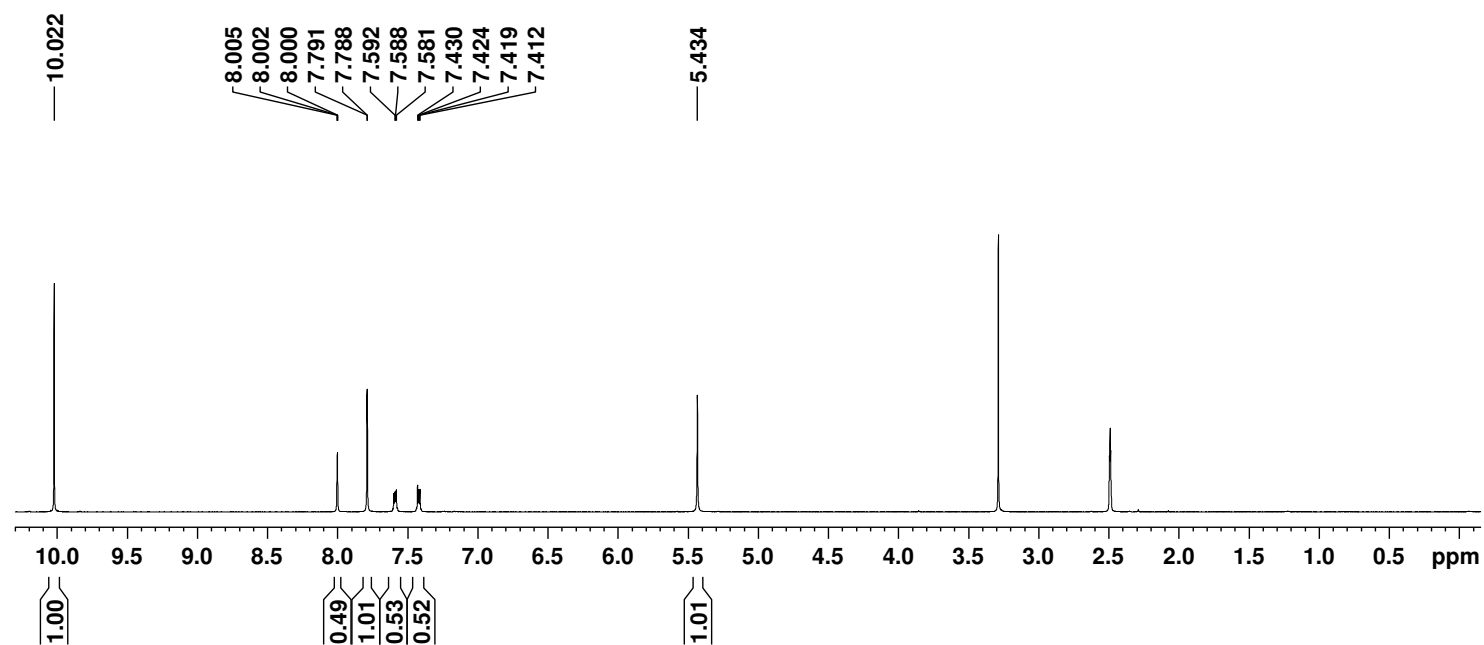

Figure S105. Proton NMR spectrum of tetraaldehyde **18a** in DMSO- $d_6$ .

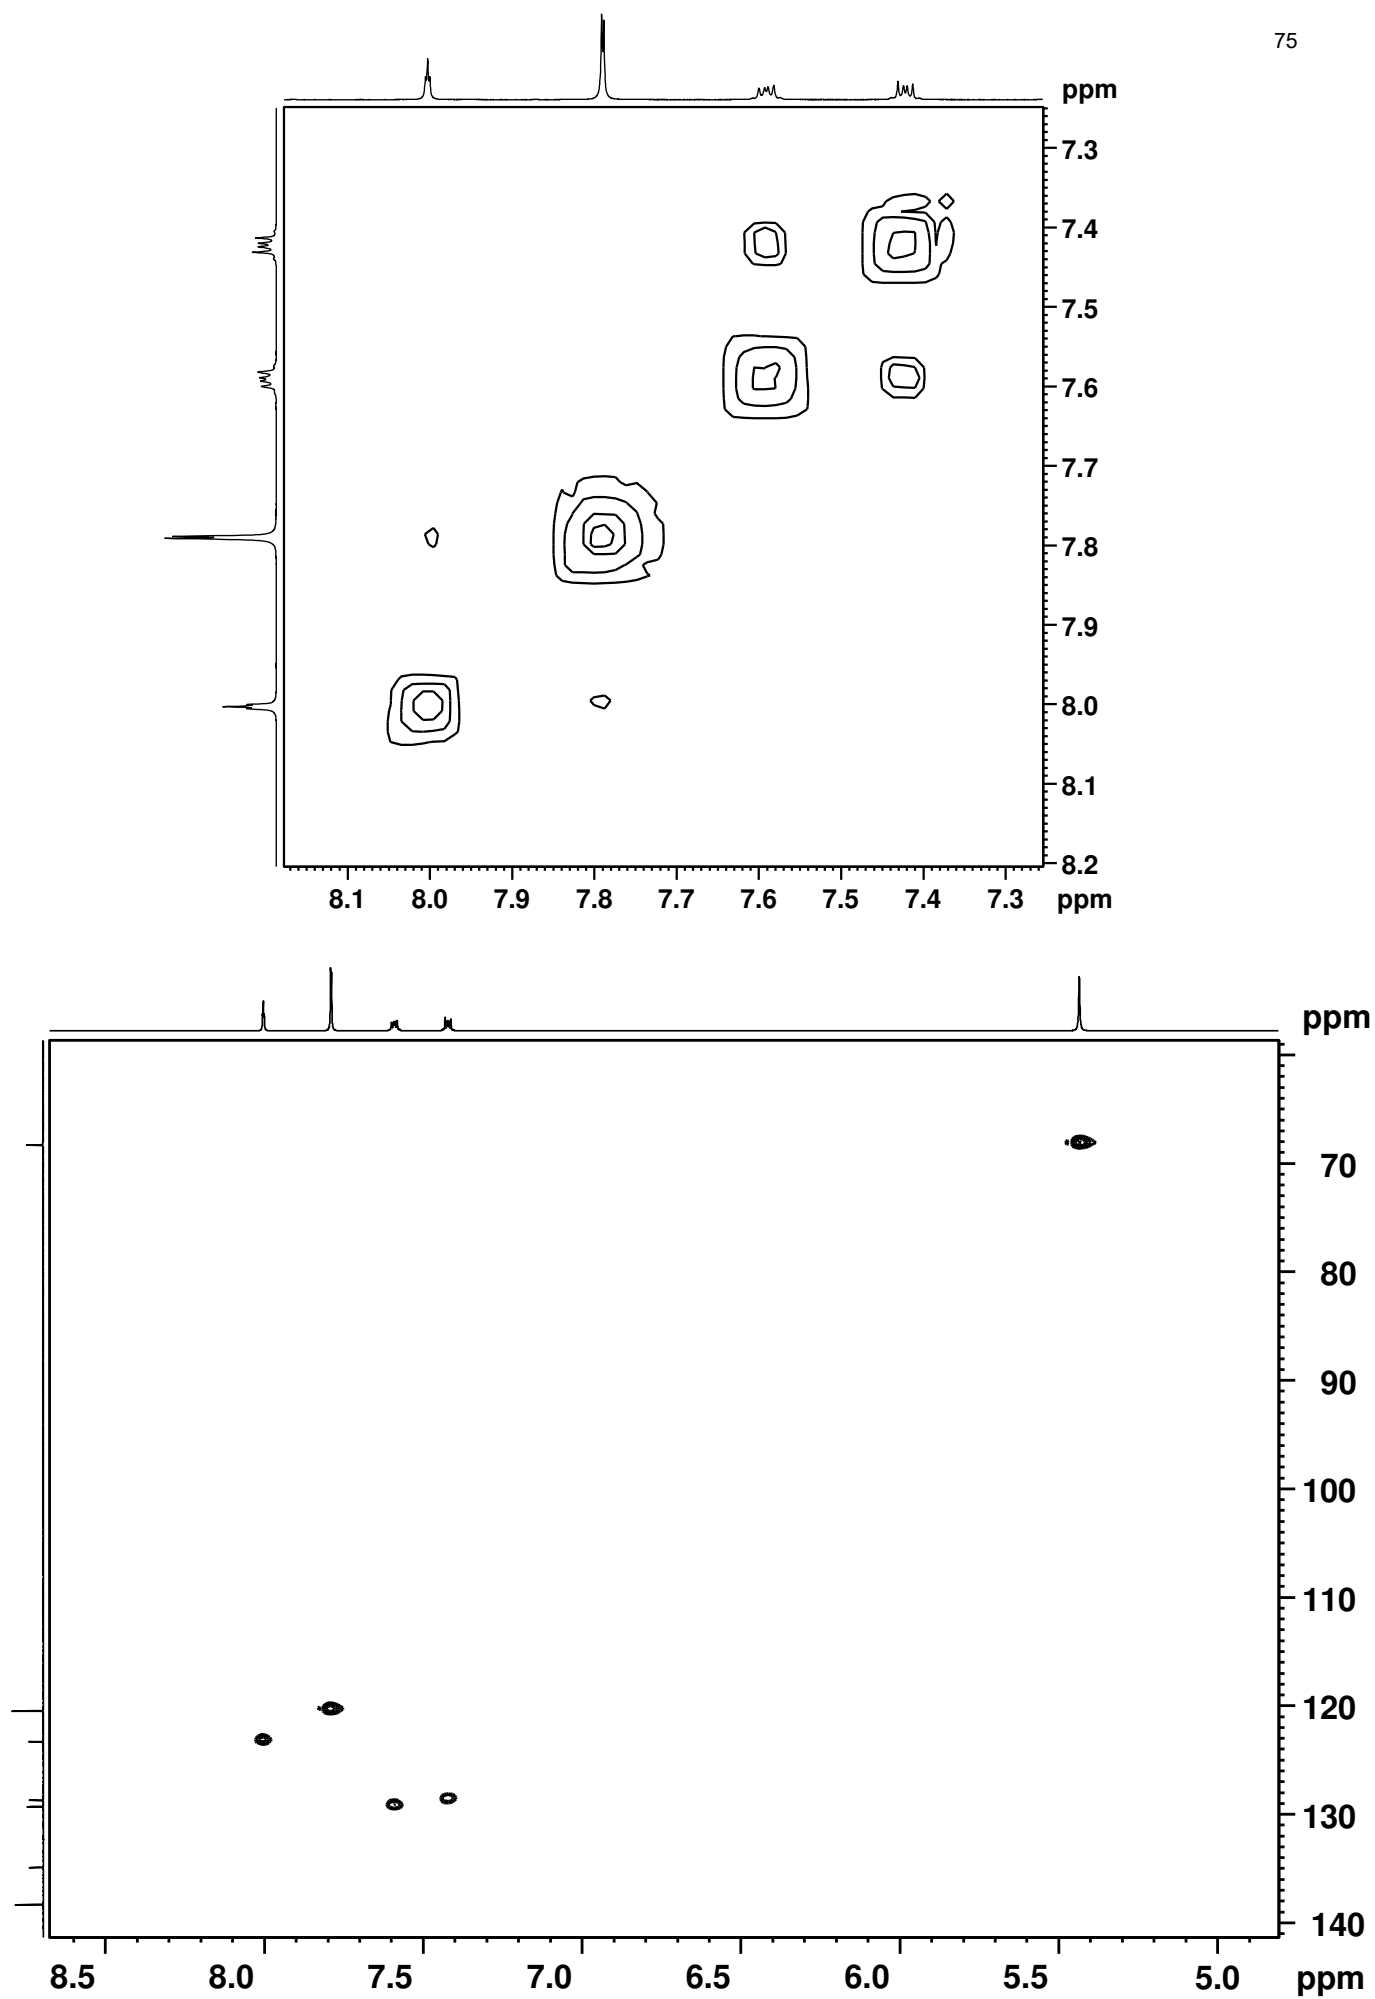

Figure S106.  $^1\text{H}$ - $^1\text{H}$  COSY (top) and HSQC (bottom) NMR spectra of **18a** in DMSO- $d_6$ .

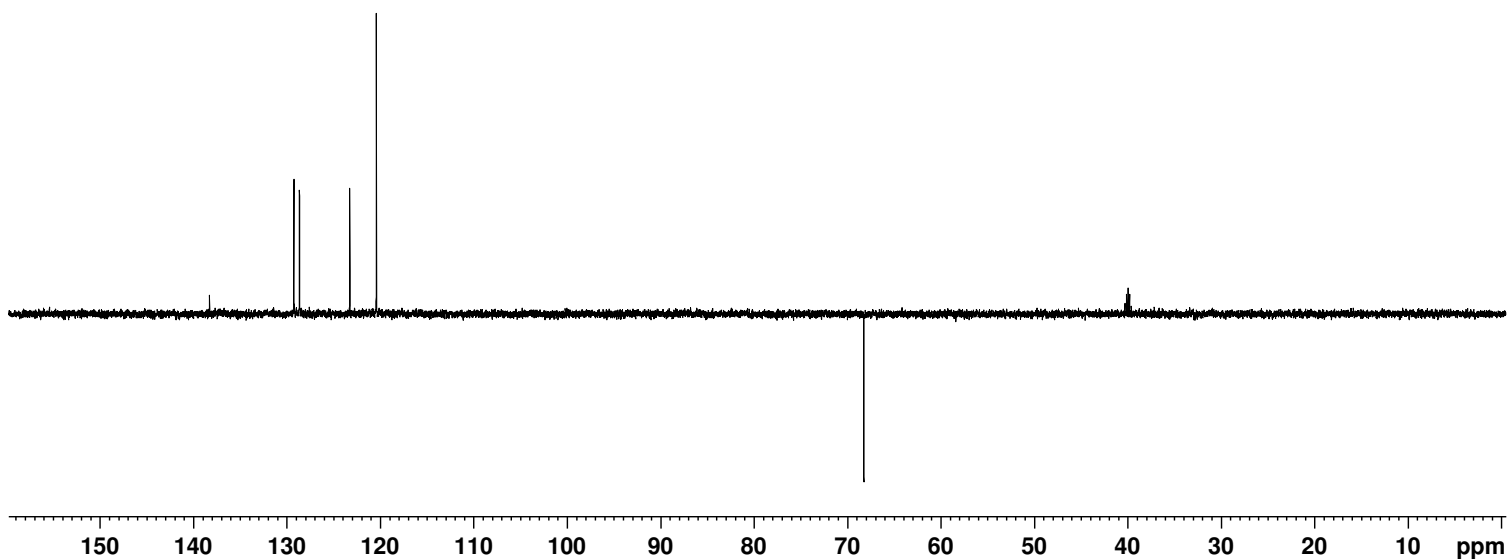

Figure S107. DEPT-135 NMR spectrum of **18a** in DMSO- $d_6$ .

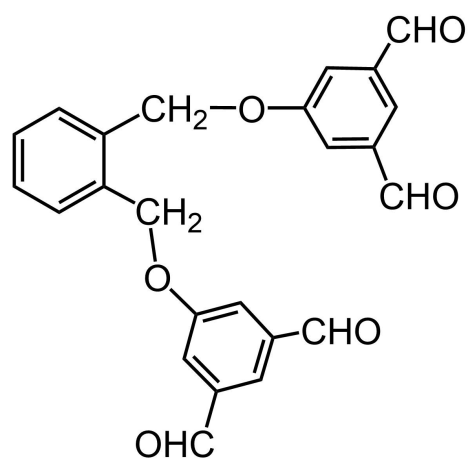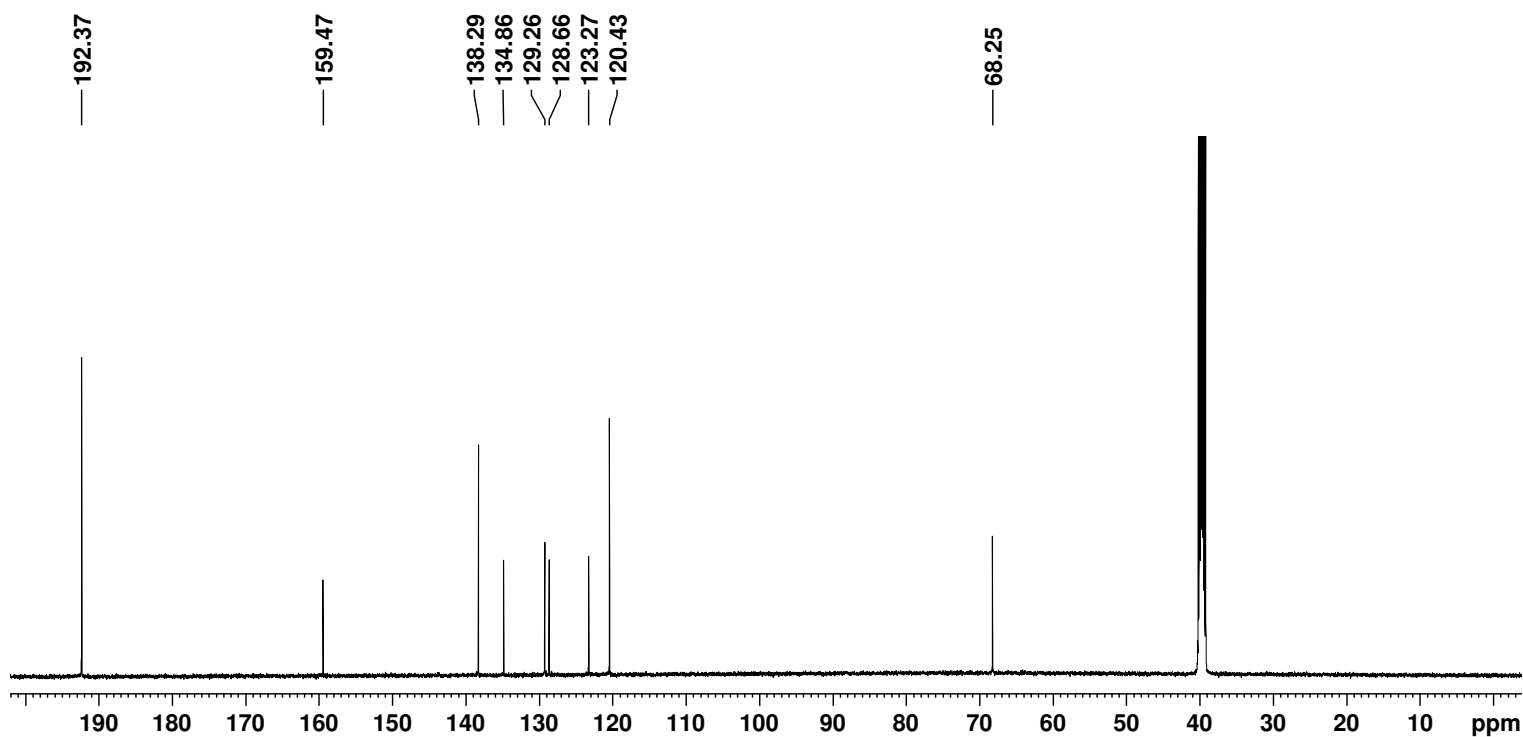

Figure S108. 125 MHz carbon-13 NMR spectrum of **18a** in DMSO- $d_6$ .



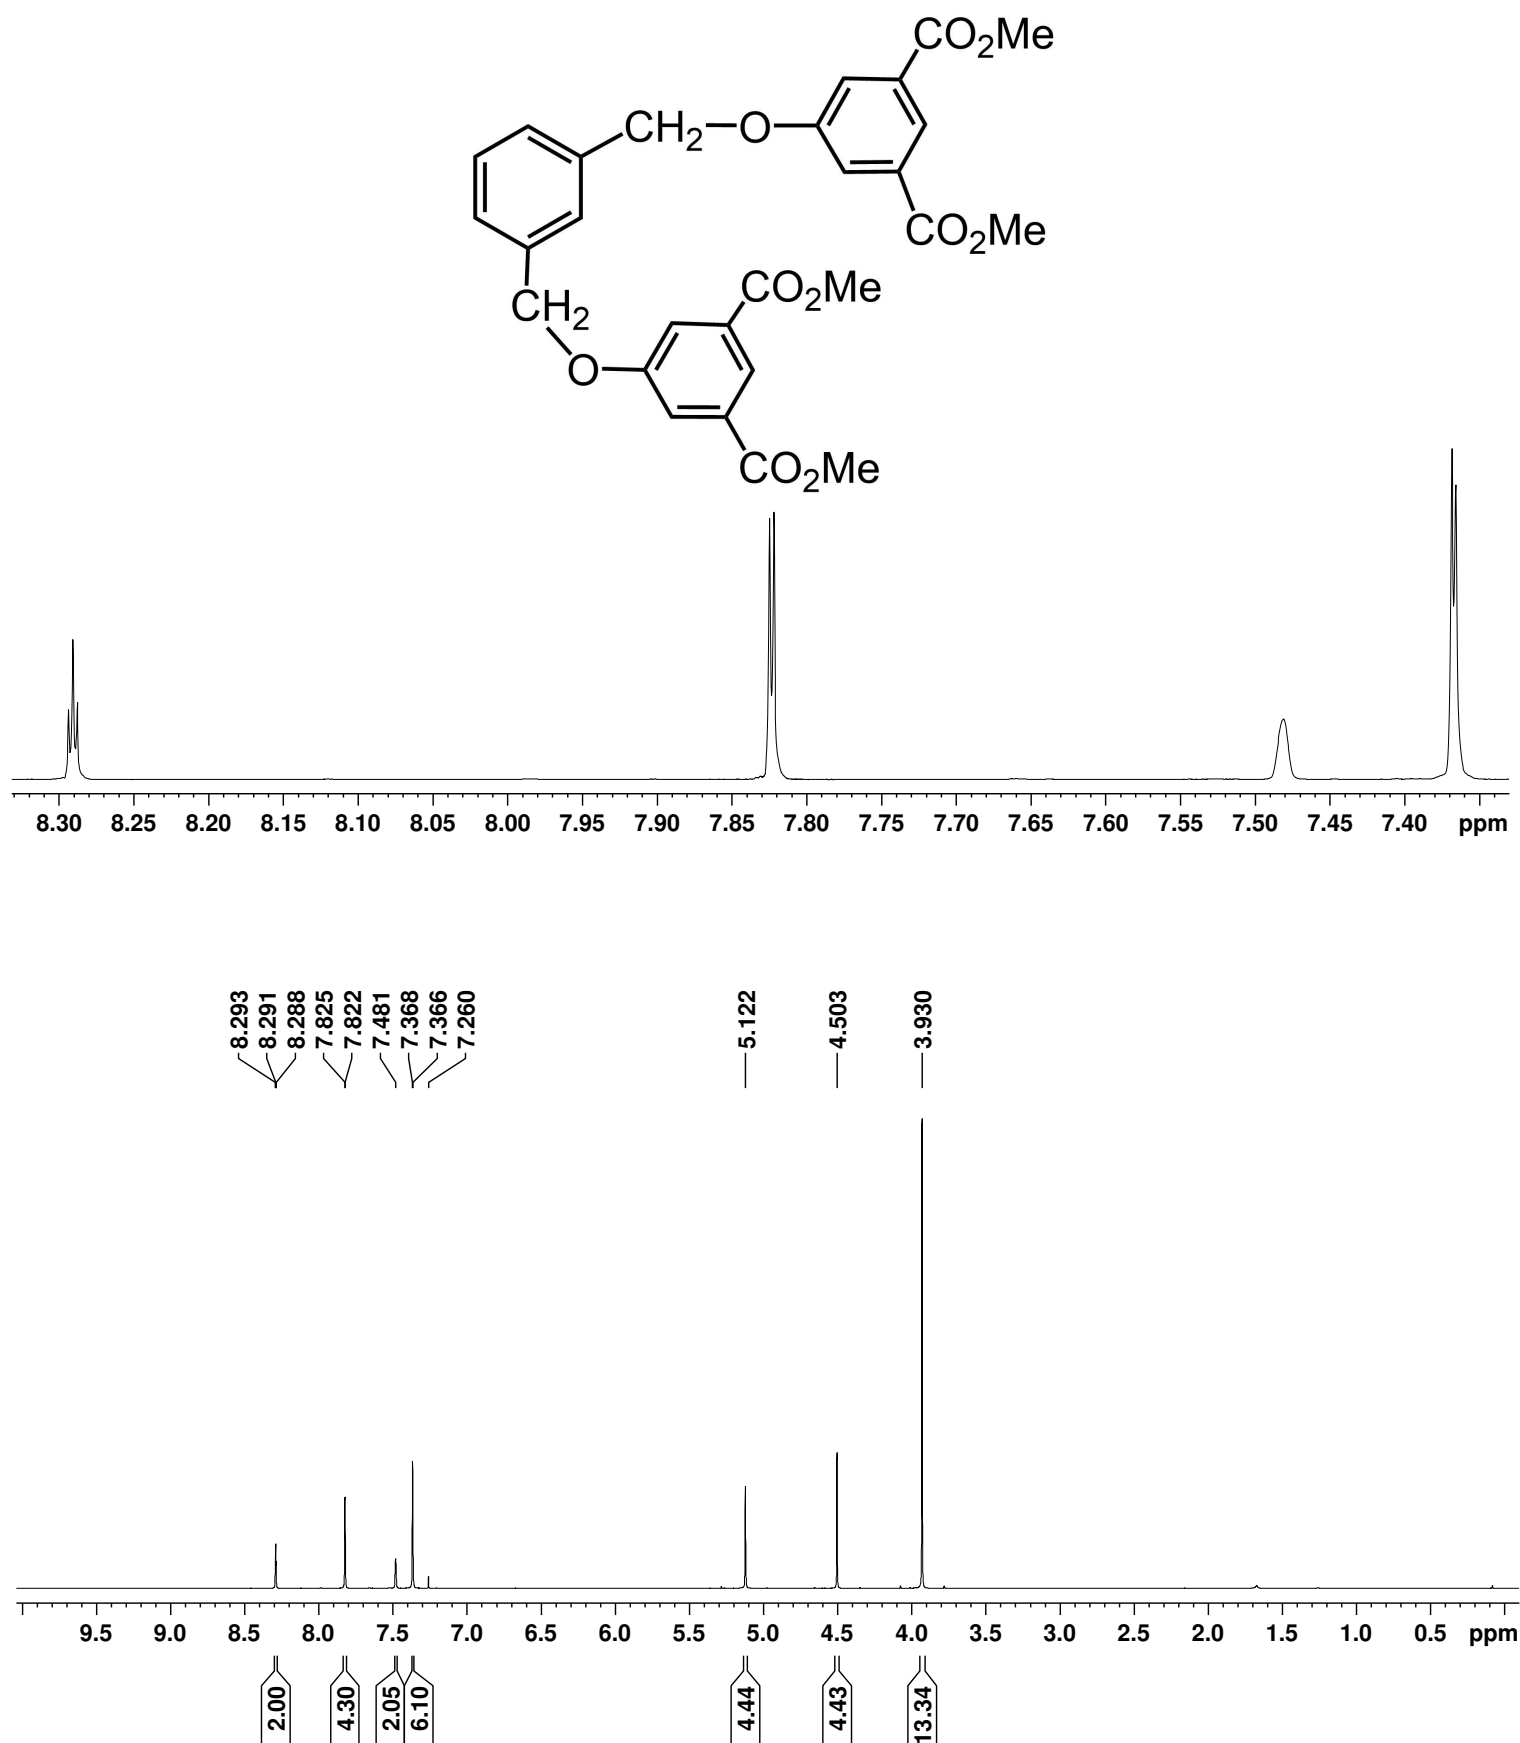

Figure S109. 500 MHz proton NMR spectrum of tetraester **16b** in CDCl<sub>3</sub>.

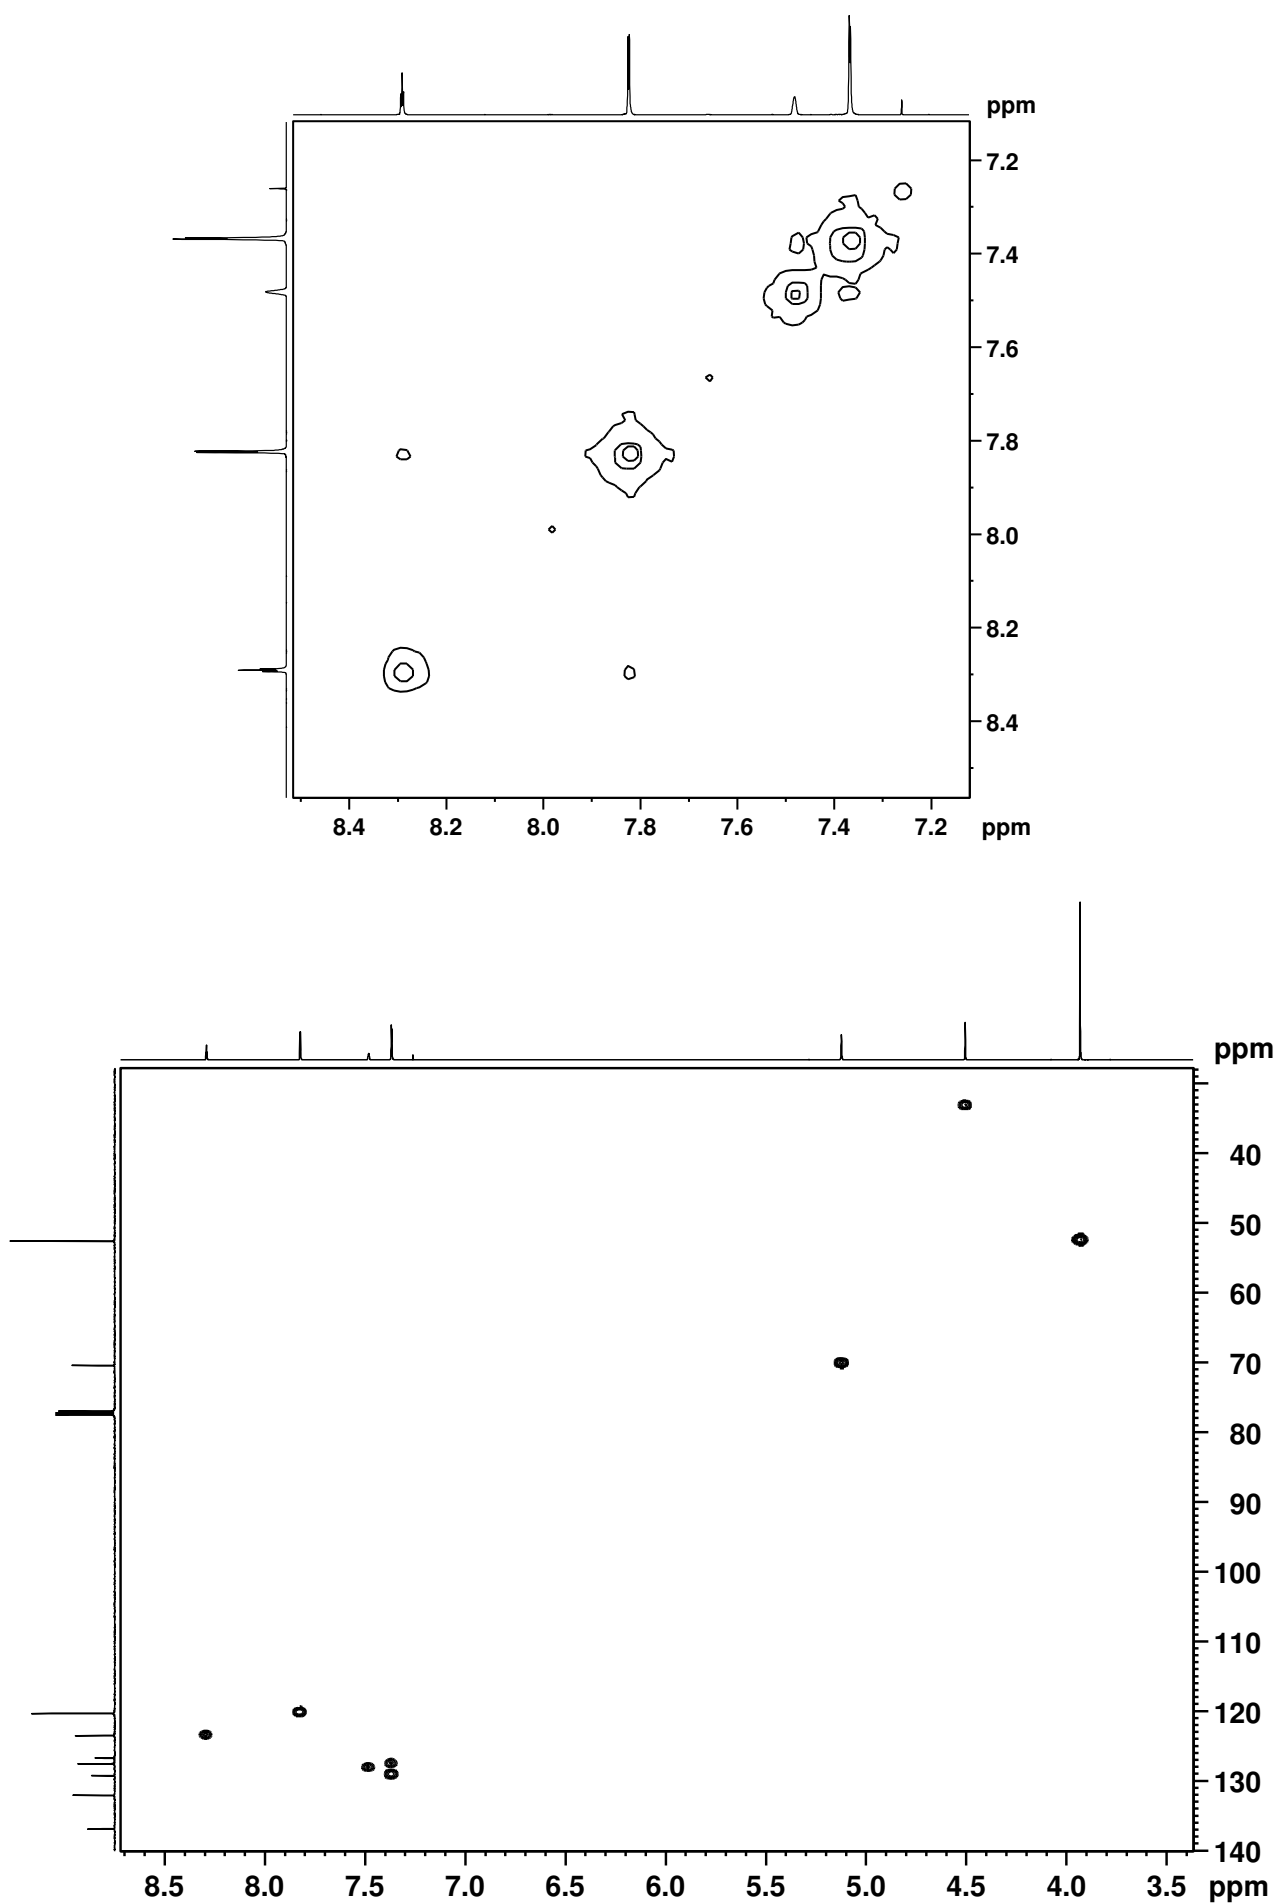

Figure S110.  $^1\text{H}$ - $^1\text{H}$  COSY (top) and HSQC (bottom) NMR spectra of **16b** in  $\text{CDCl}_3$ .

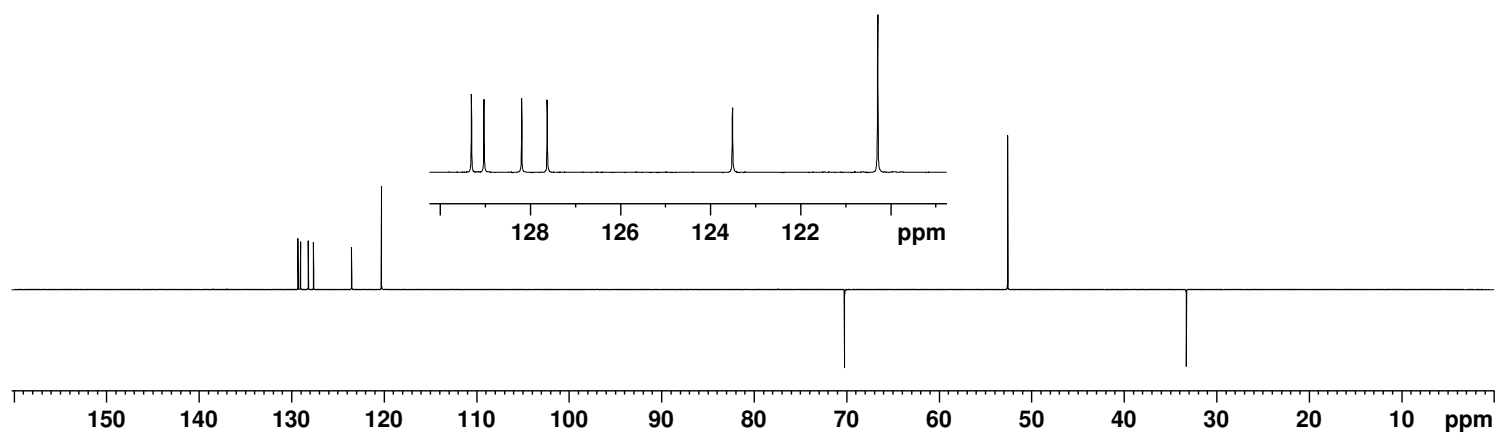

Figure S111. DEPT-135 NMR spectrum of **16b** in  $\text{CDCl}_3$ .

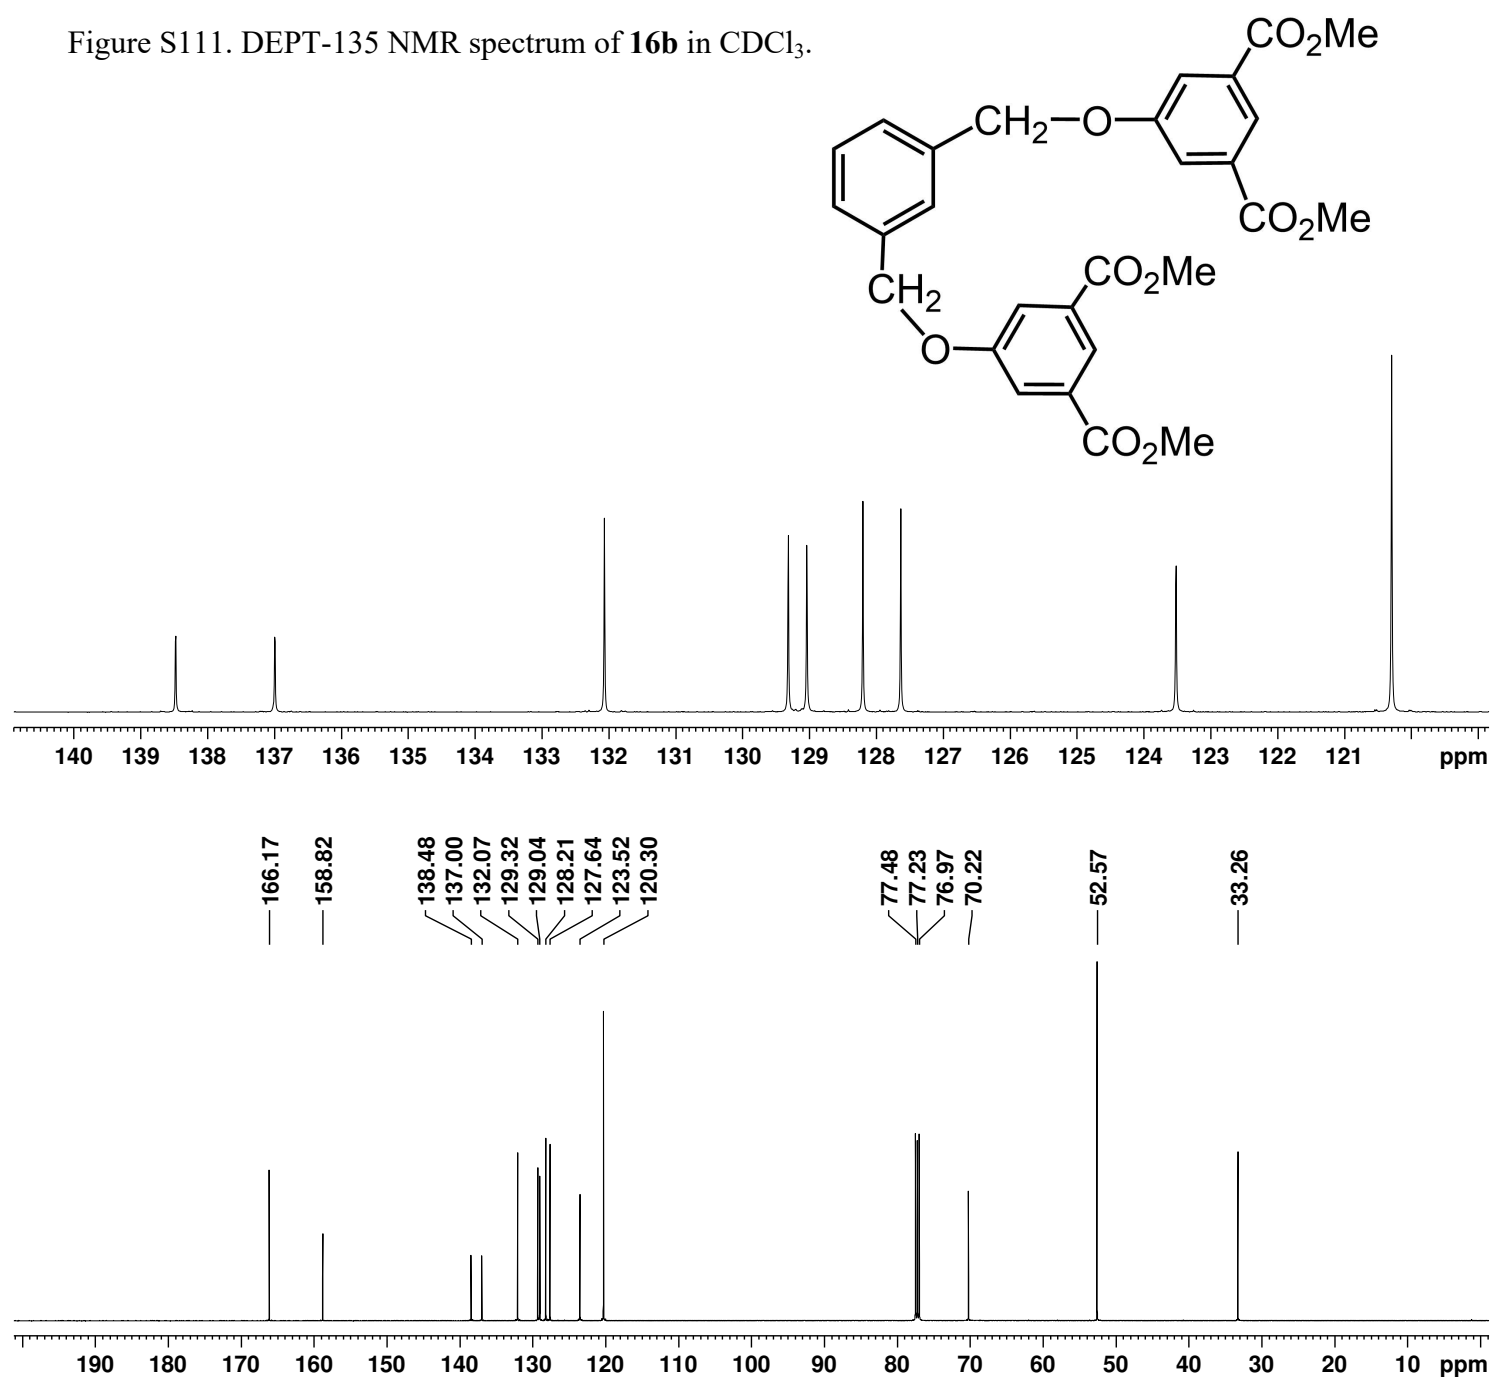

Figure S112. 125 MHz carbon-13 NMR spectrum of **16b** in  $\text{CDCl}_3$ .

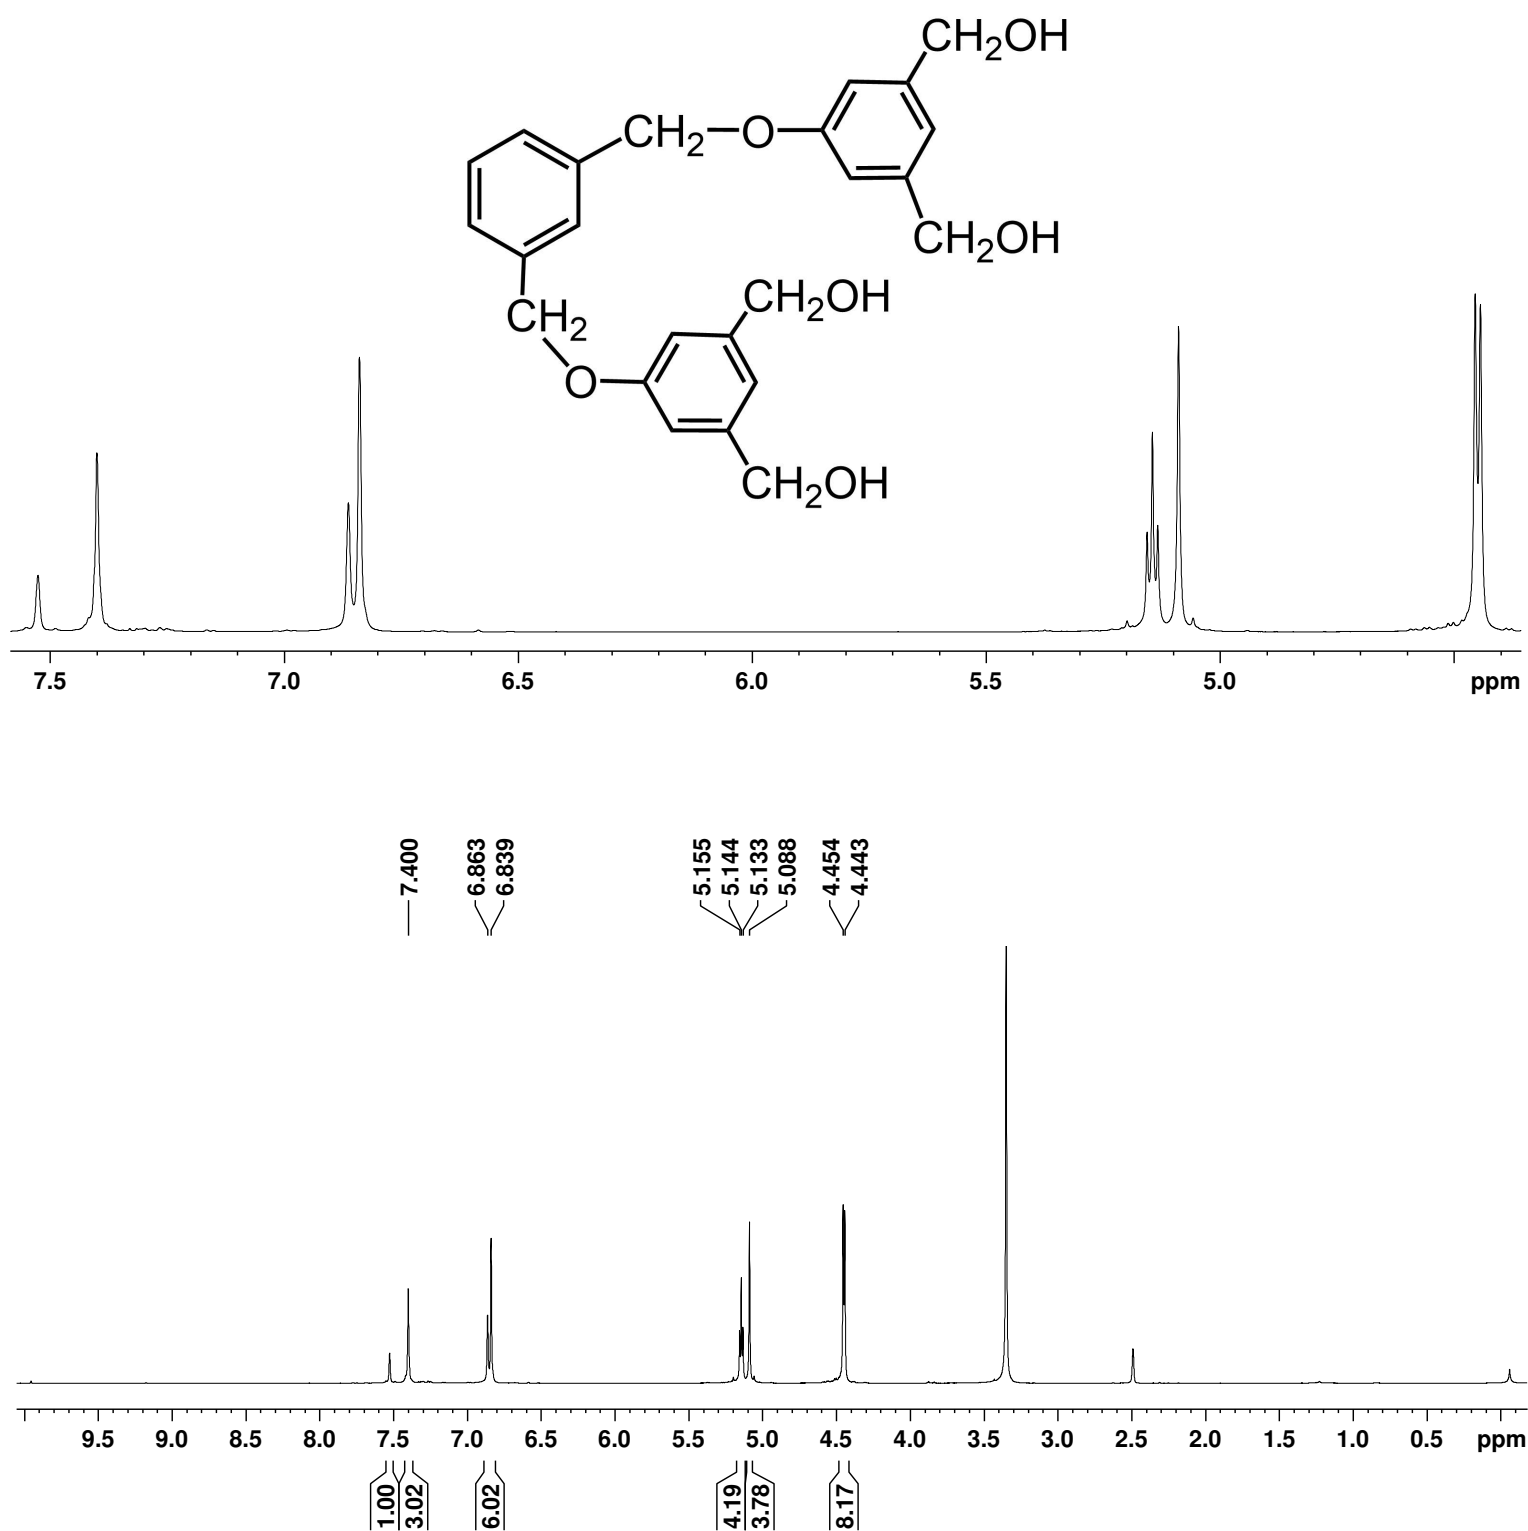

Figure S113. 500 MHz proton NMR spectrum of tetraalcohol **17b** in  $\text{DMSO}-d_6$ .

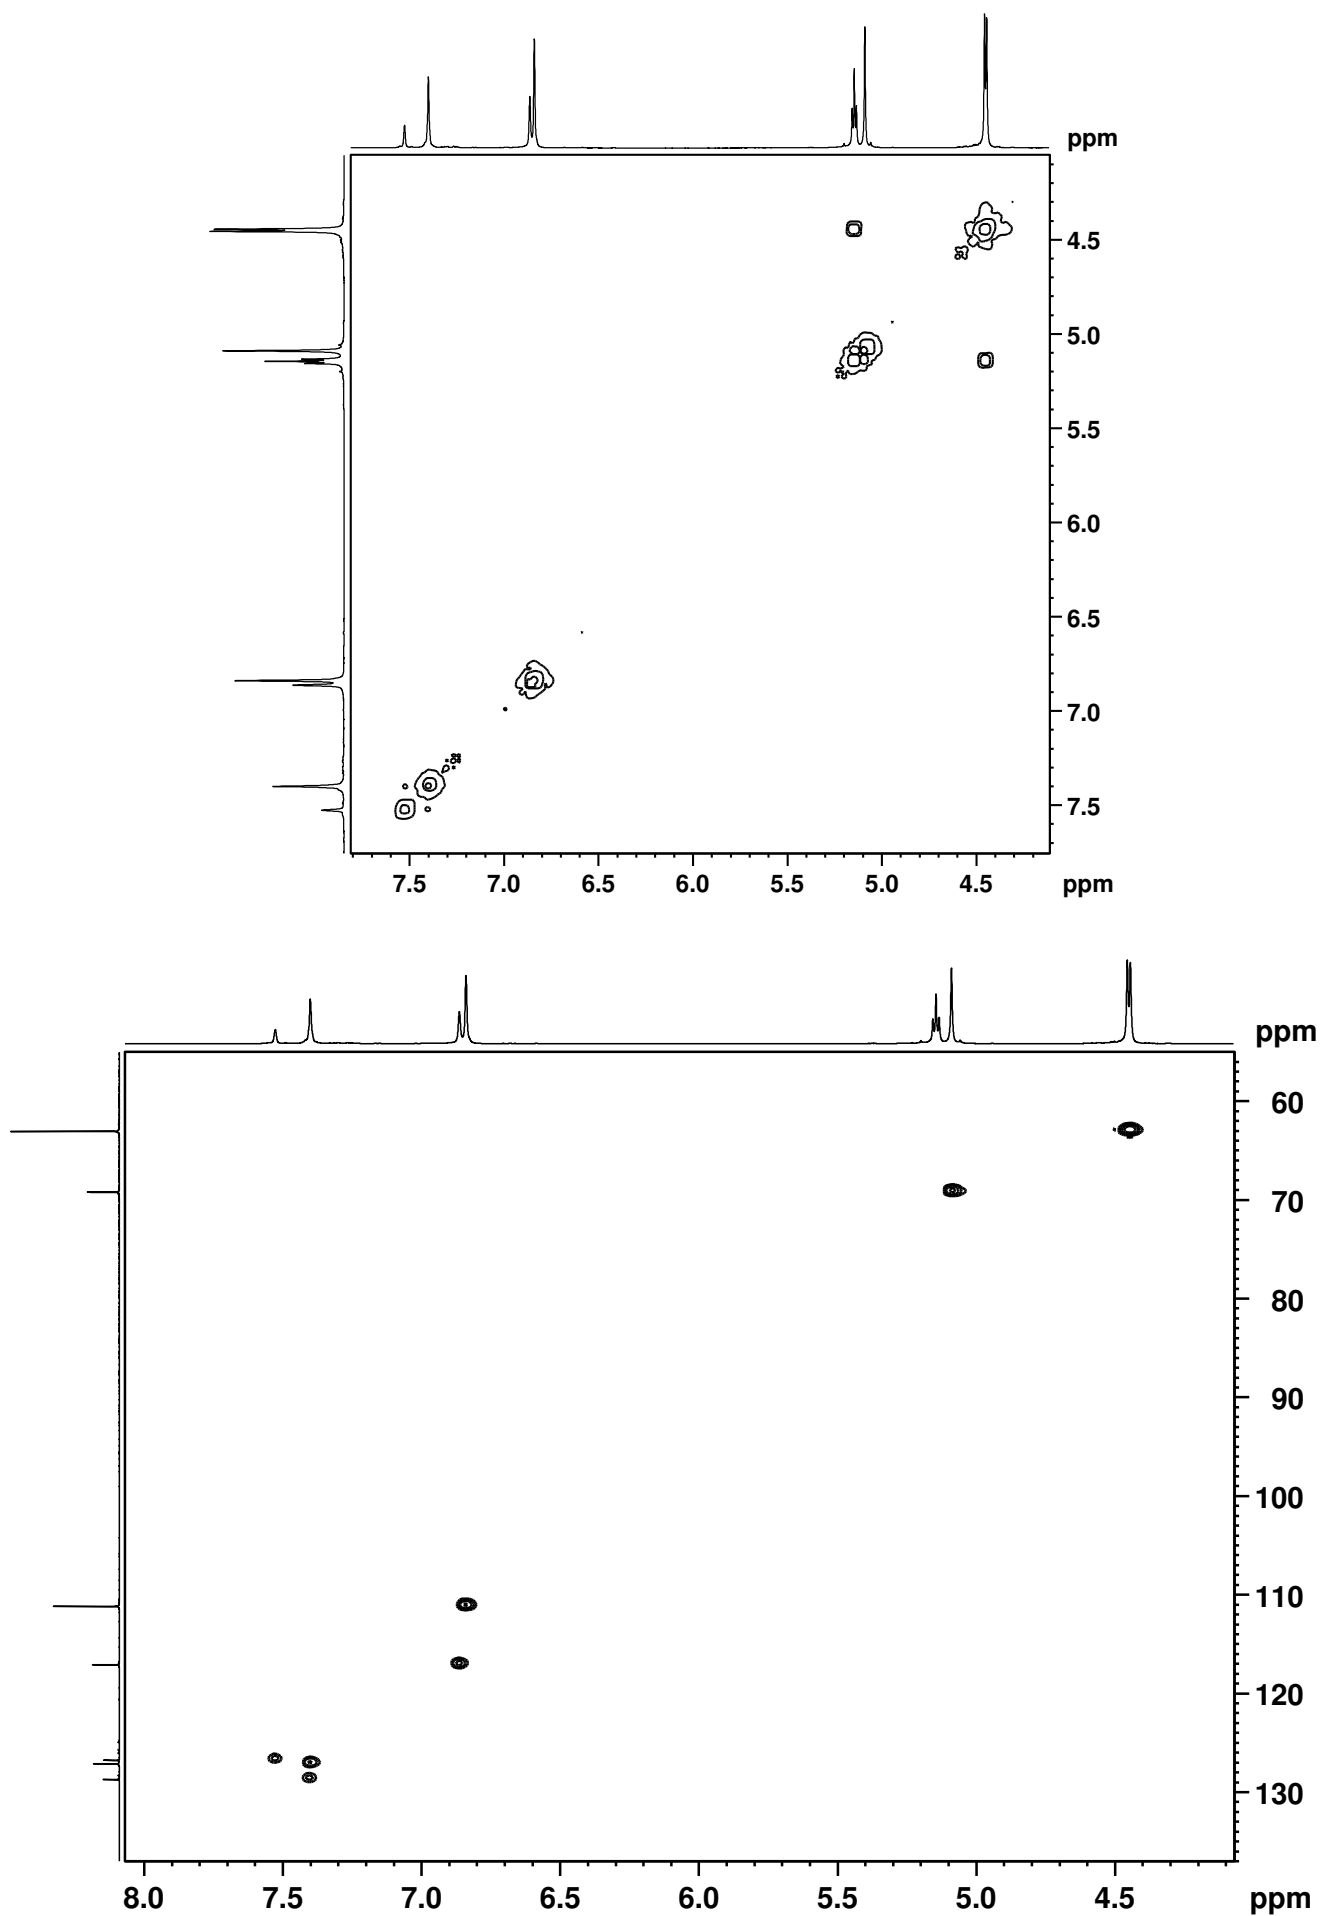

Figure S114.  $^1\text{H}$ - $^1\text{H}$  COSY (top) and HSQC (bottom) NMR spectra of **17b** in DMSO- $d_6$ .

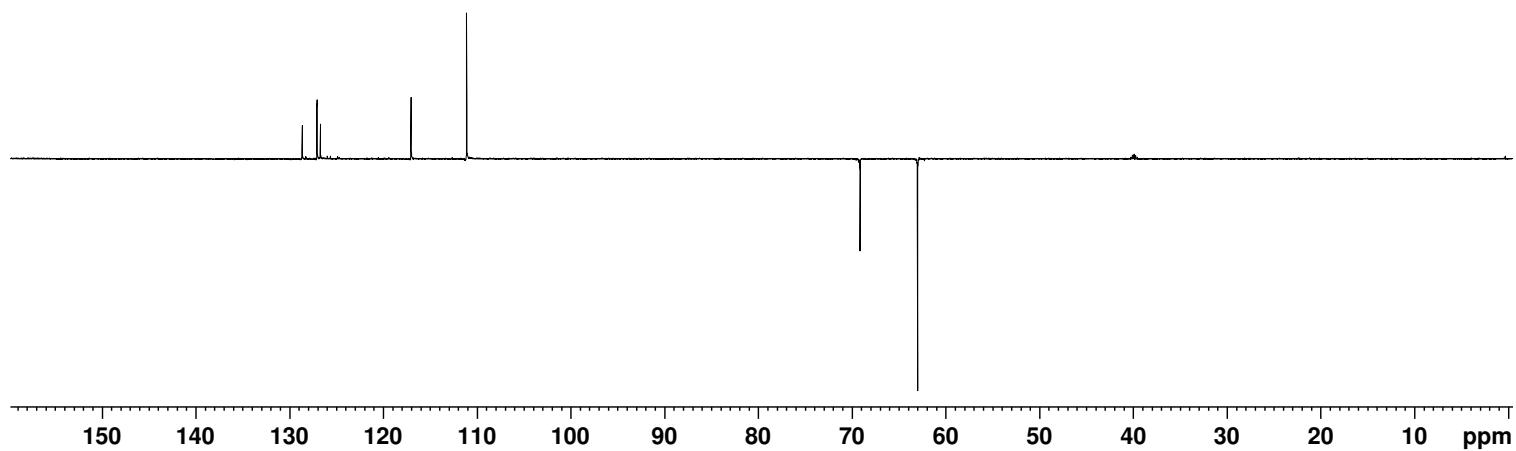

Figure S115. DEPT-135 NMR spectrum of **17b** in DMSO- $d_6$ .

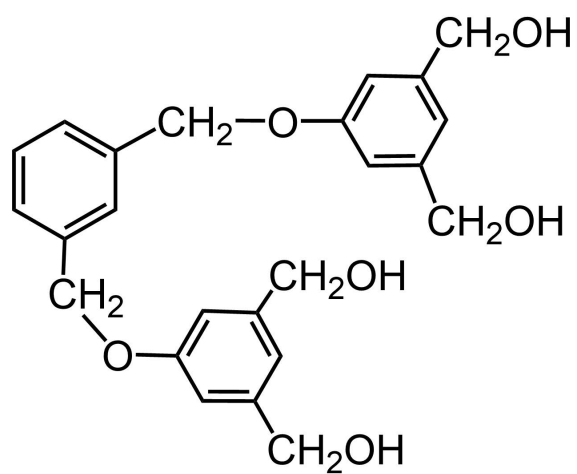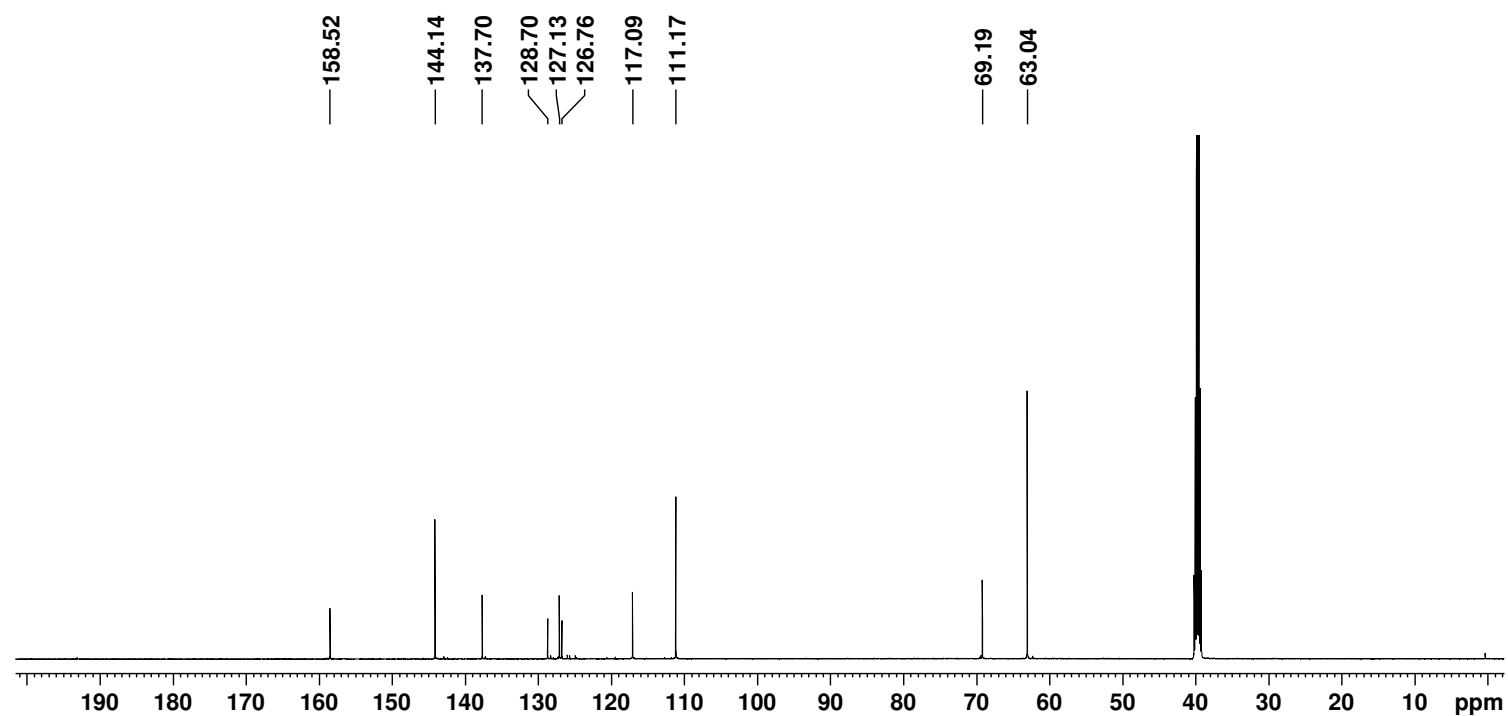

Figure S116. Carbon-13 NMR spectrum of **17b** in DMSO- $d_6$ .

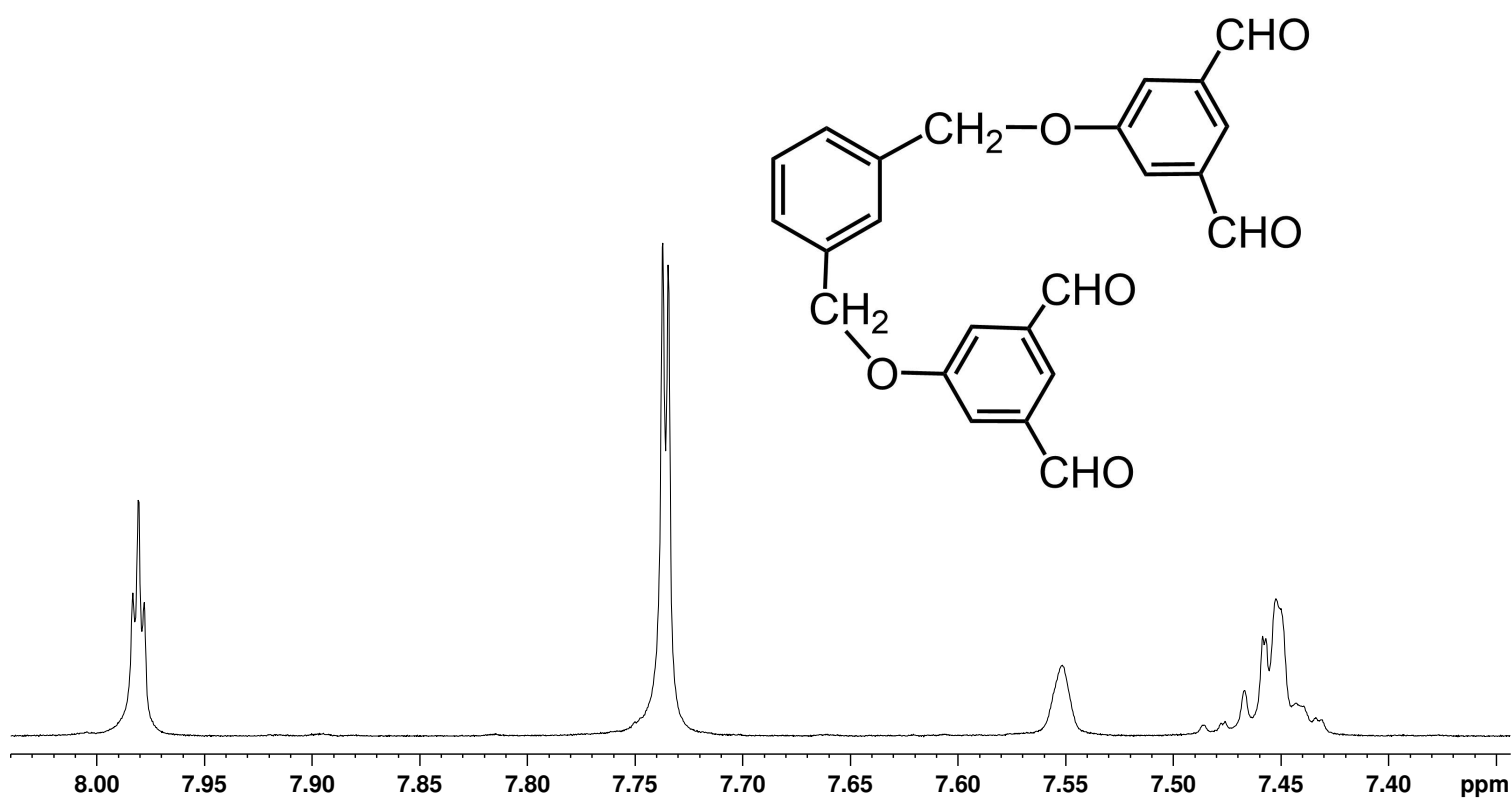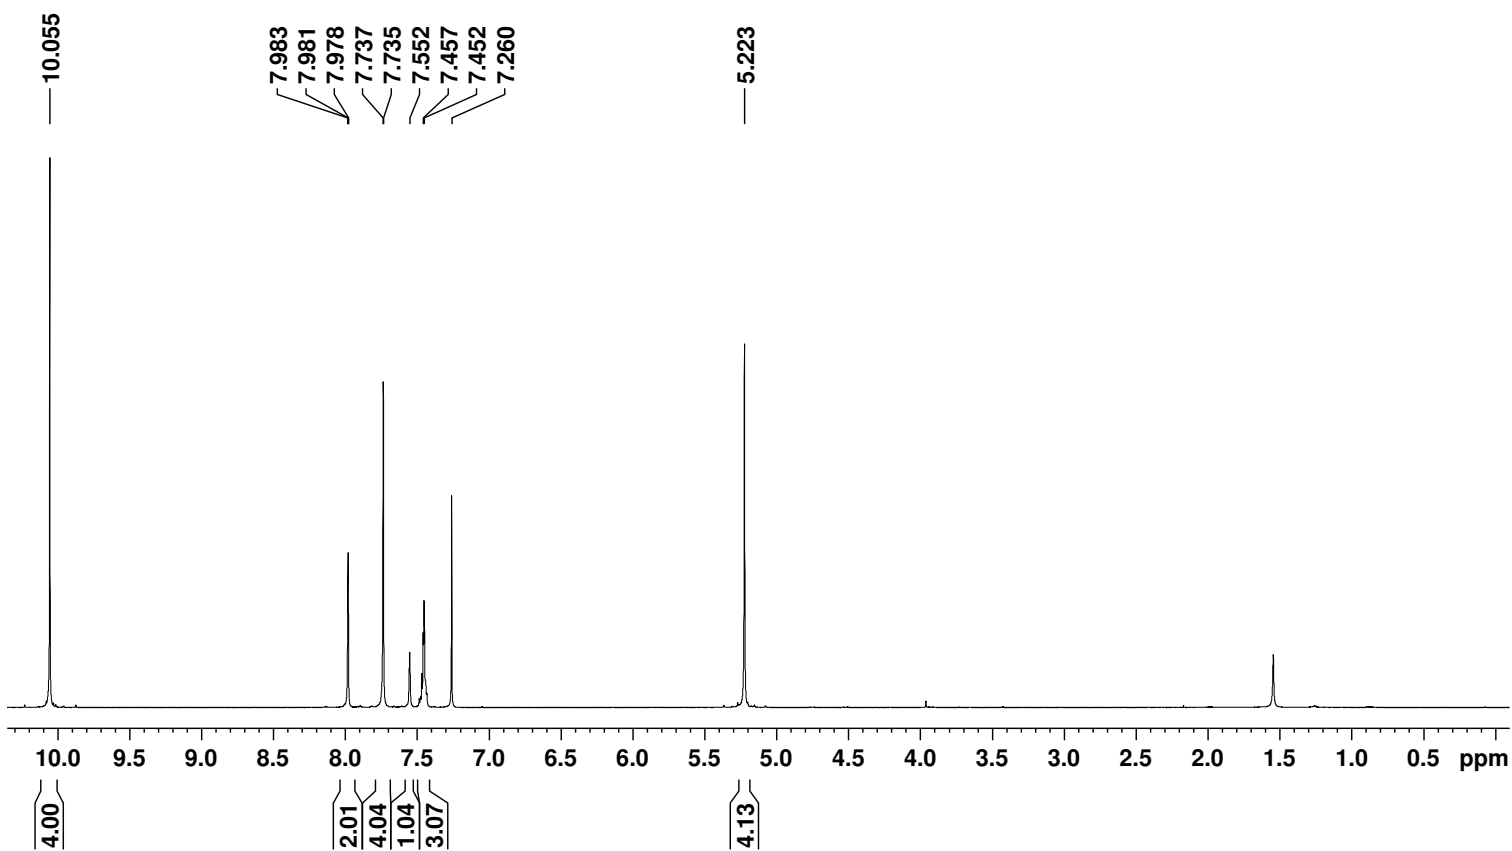

Figure S117. 500 MHz proton NMR spectrum of tetraaldehyde **18b** in  $\text{CDCl}_3$ .

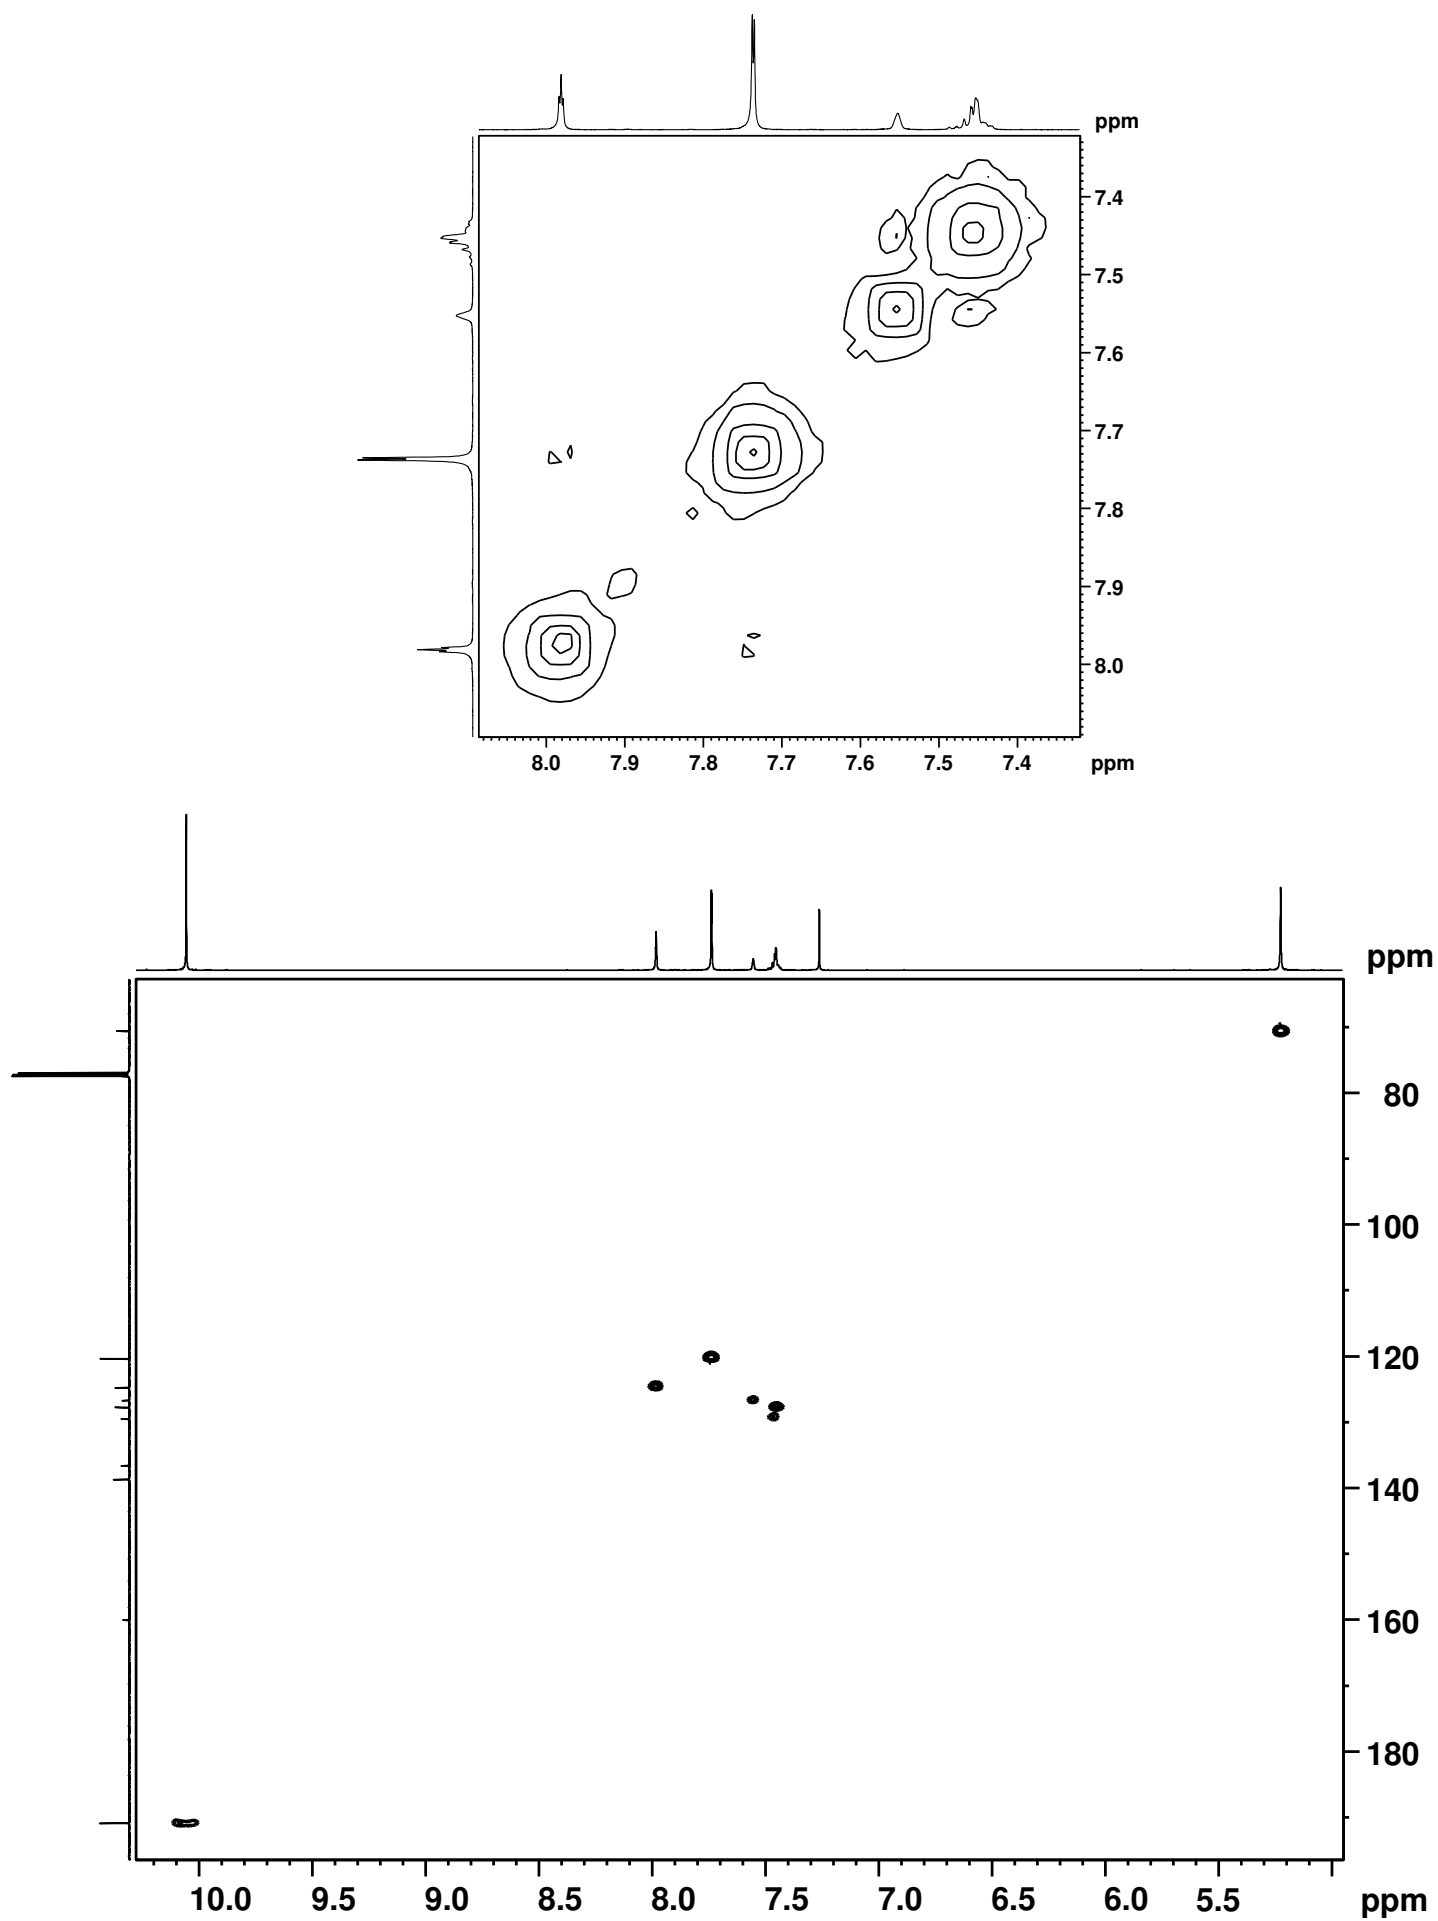

Figure S118. <sup>1</sup>H-<sup>1</sup>H COSY (top) and HSQC (bottom) NMR spectra of **18b** in CDCl<sub>3</sub>.



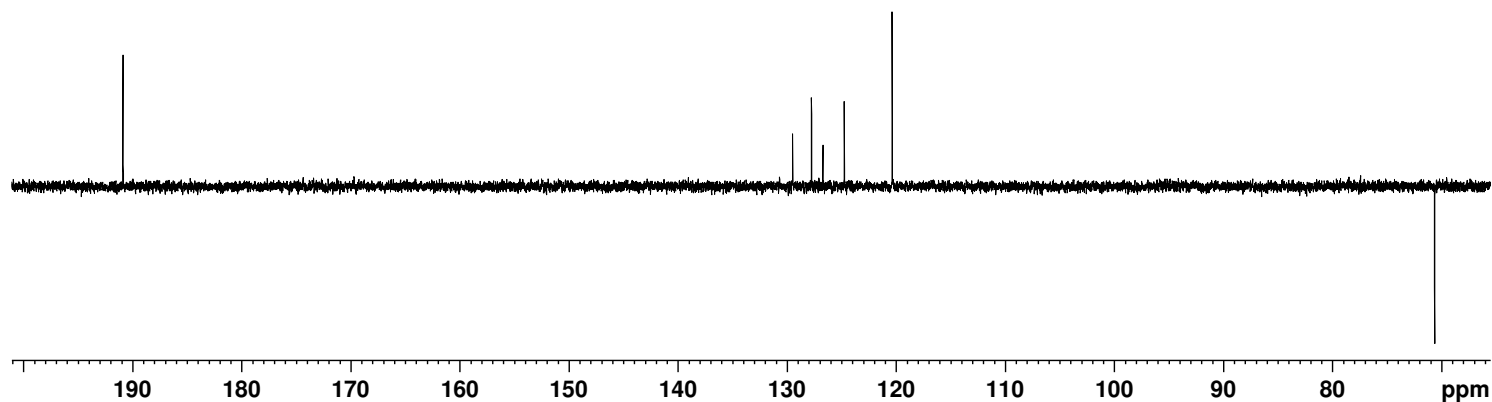

Figure S119. DEPT-135 NMR spectrum of **18b** in  $\text{CDCl}_3$ .

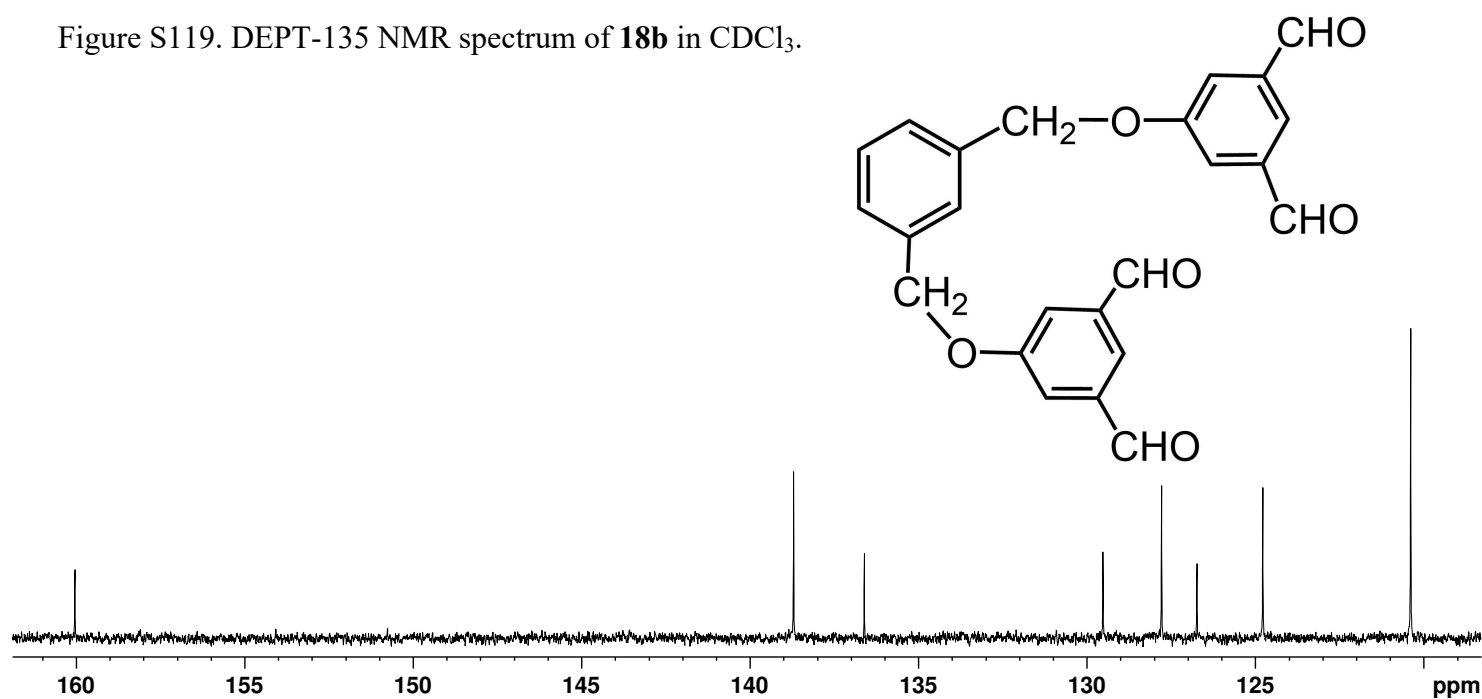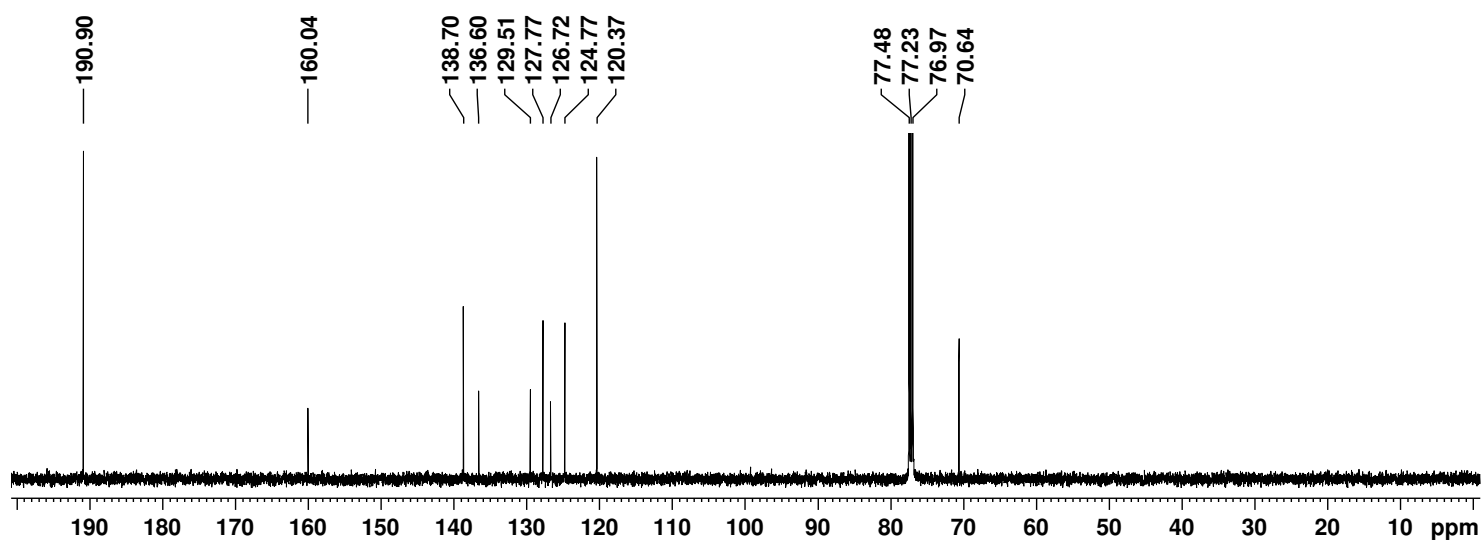

Figure S120. 125 MHz carbon-13 NMR spectrum of **18b** in  $\text{CDCl}_3$ .

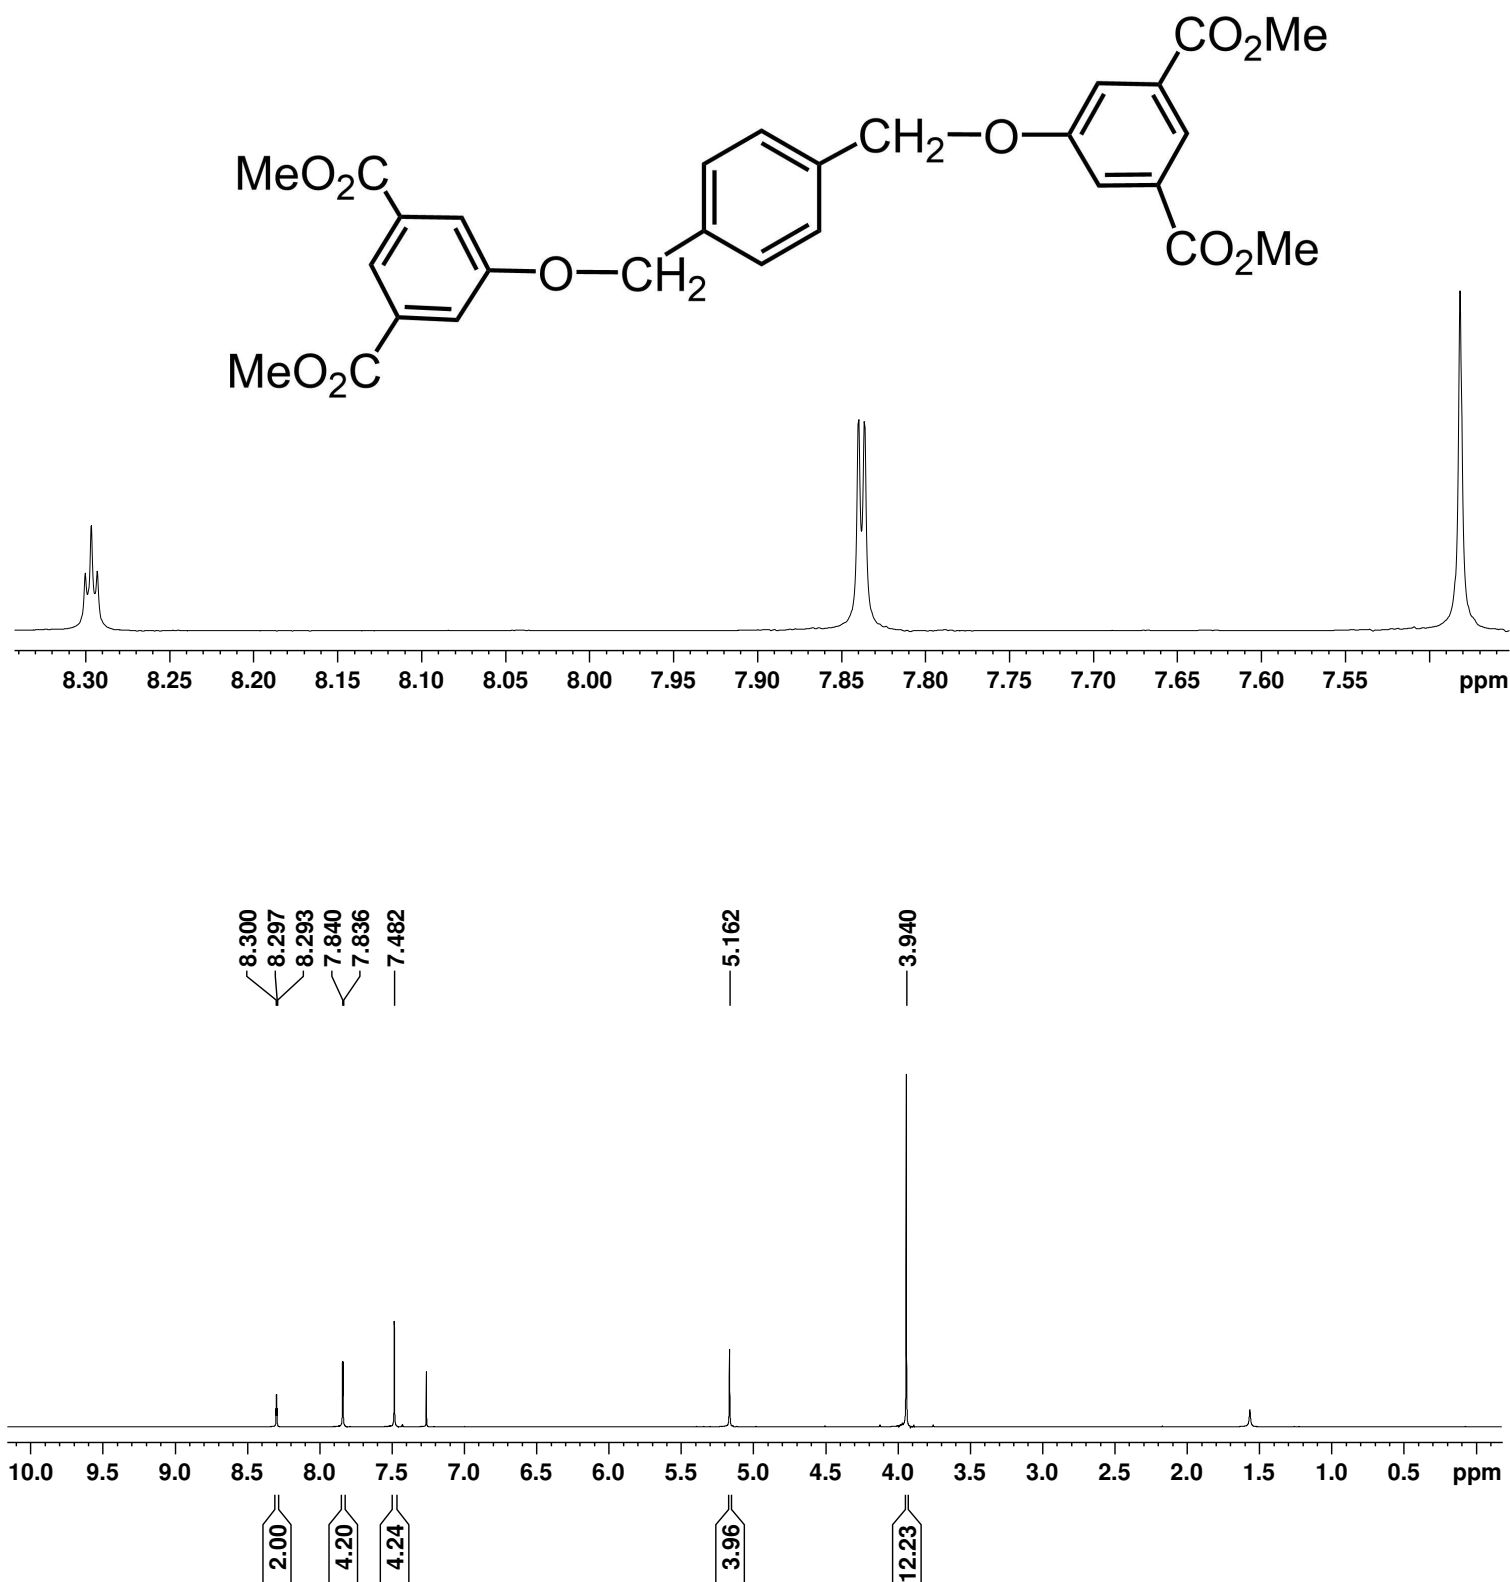

Figure S121. 500 MHz proton NMR spectrum of tetraester **16c** in CDCl<sub>3</sub>.

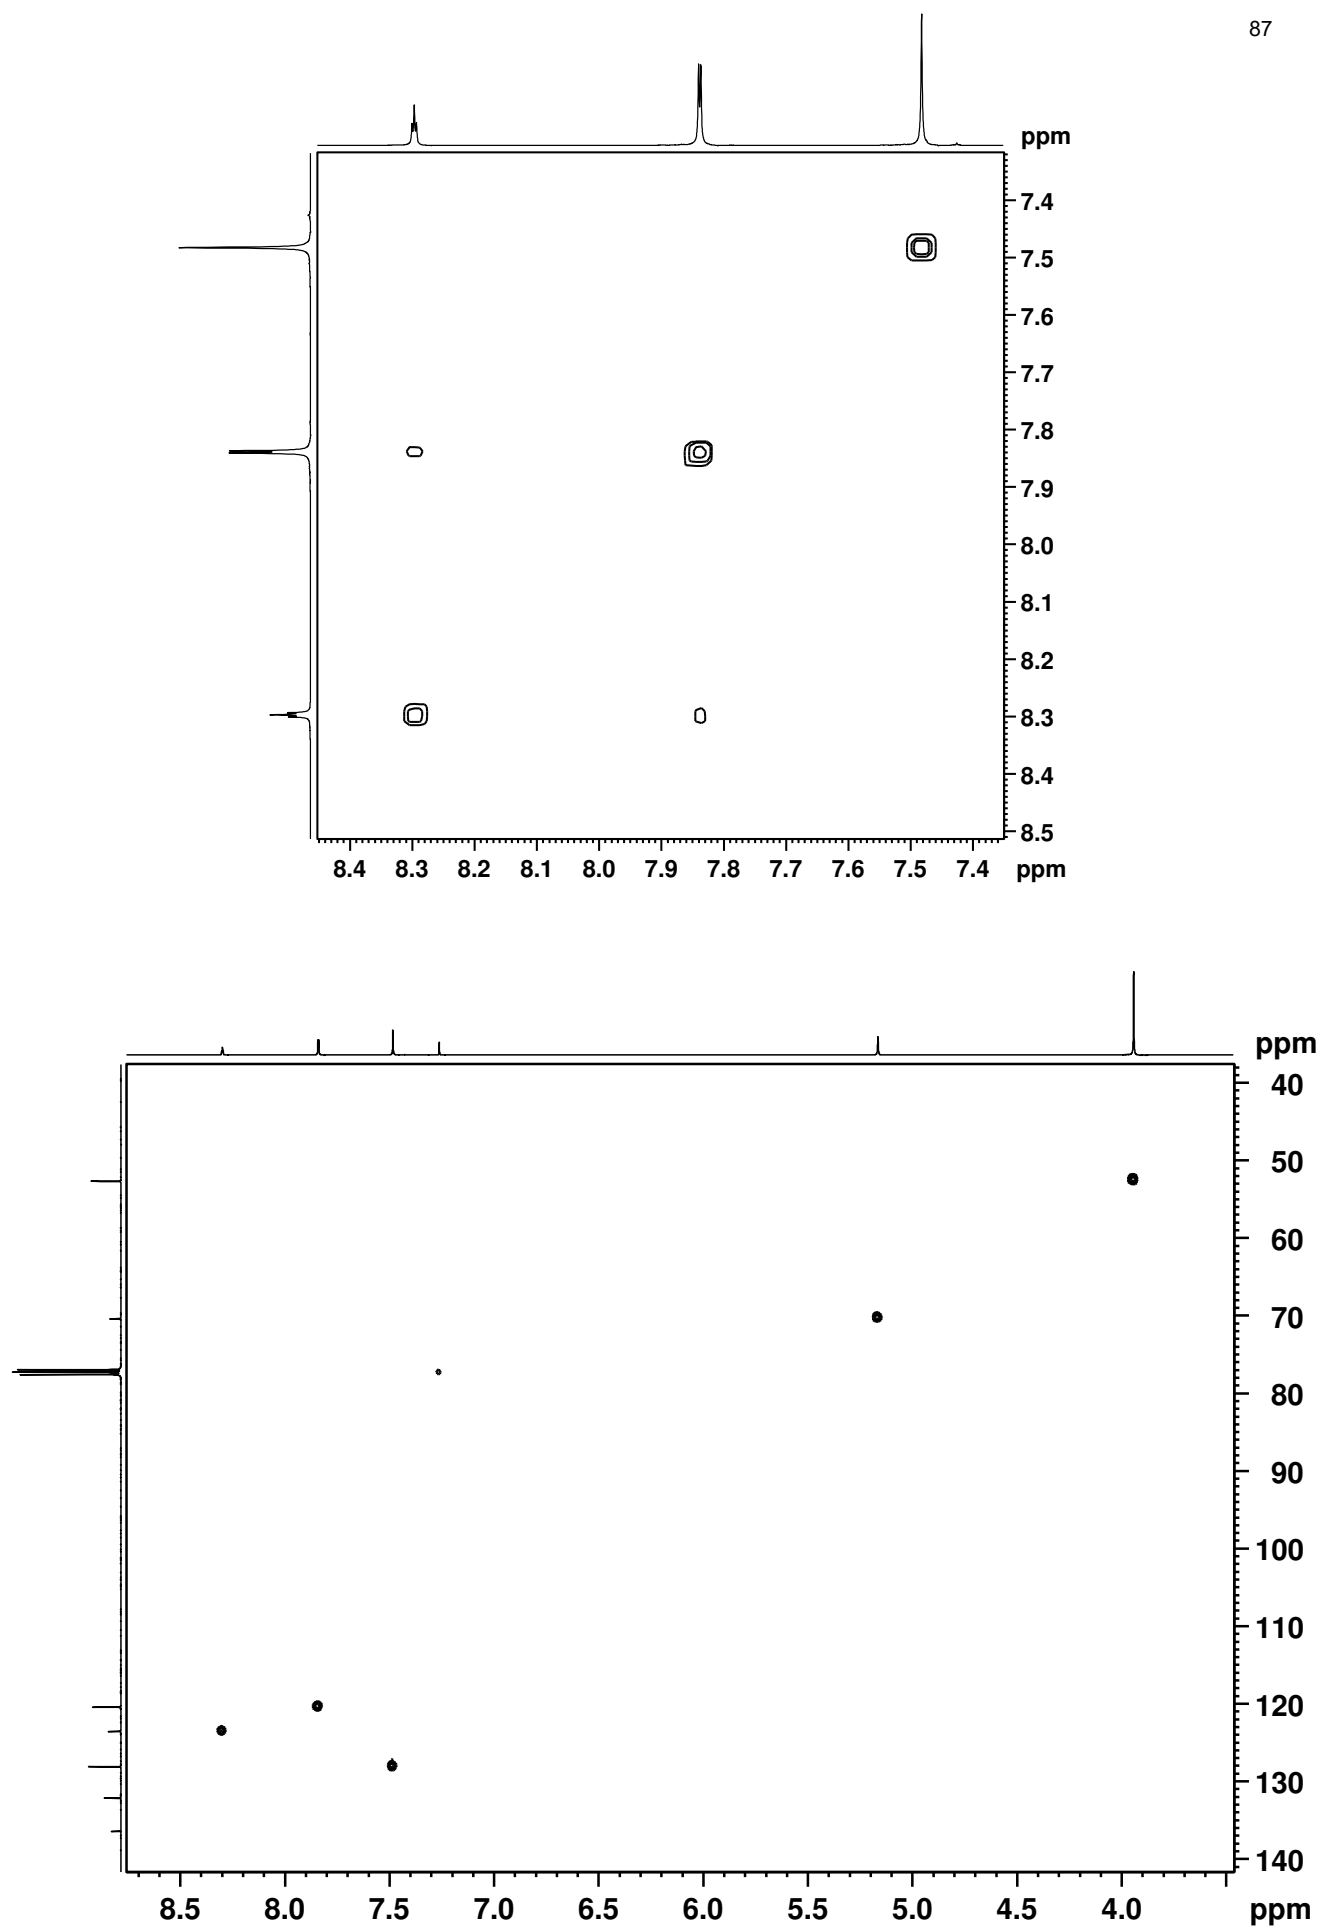

Figure S122.  $^1\text{H}$ - $^1\text{H}$  COSY (top) and HSQC (bottom) NMR spectra of **16c** in  $\text{CDCl}_3$ .

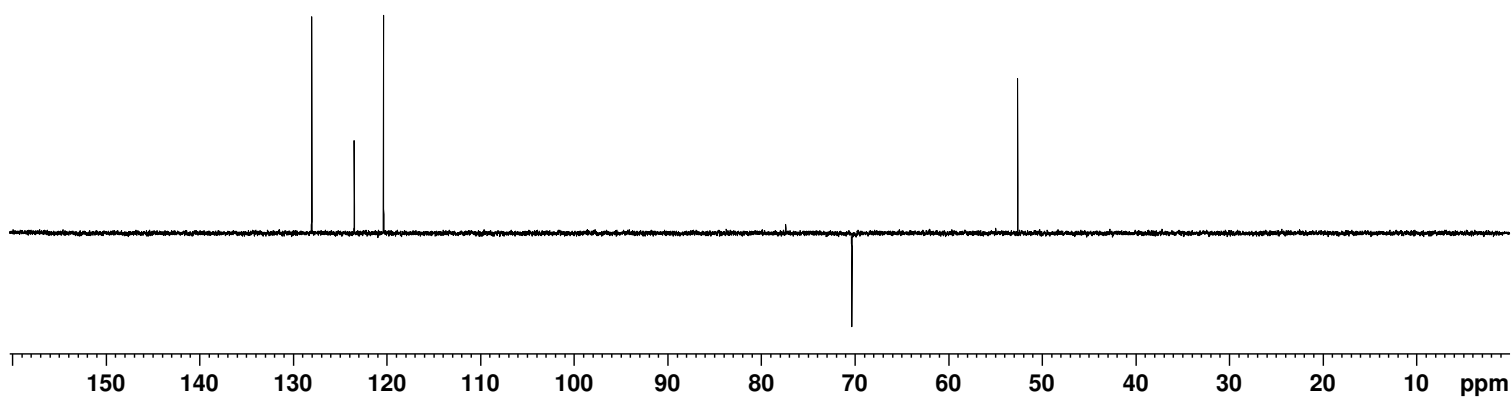

Figure S123. DEPT-135 NMR spectrum of **16c** in  $\text{CDCl}_3$ .

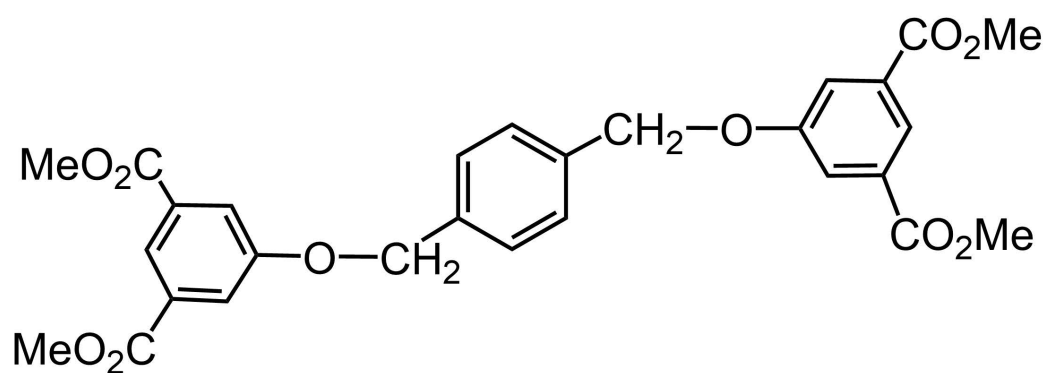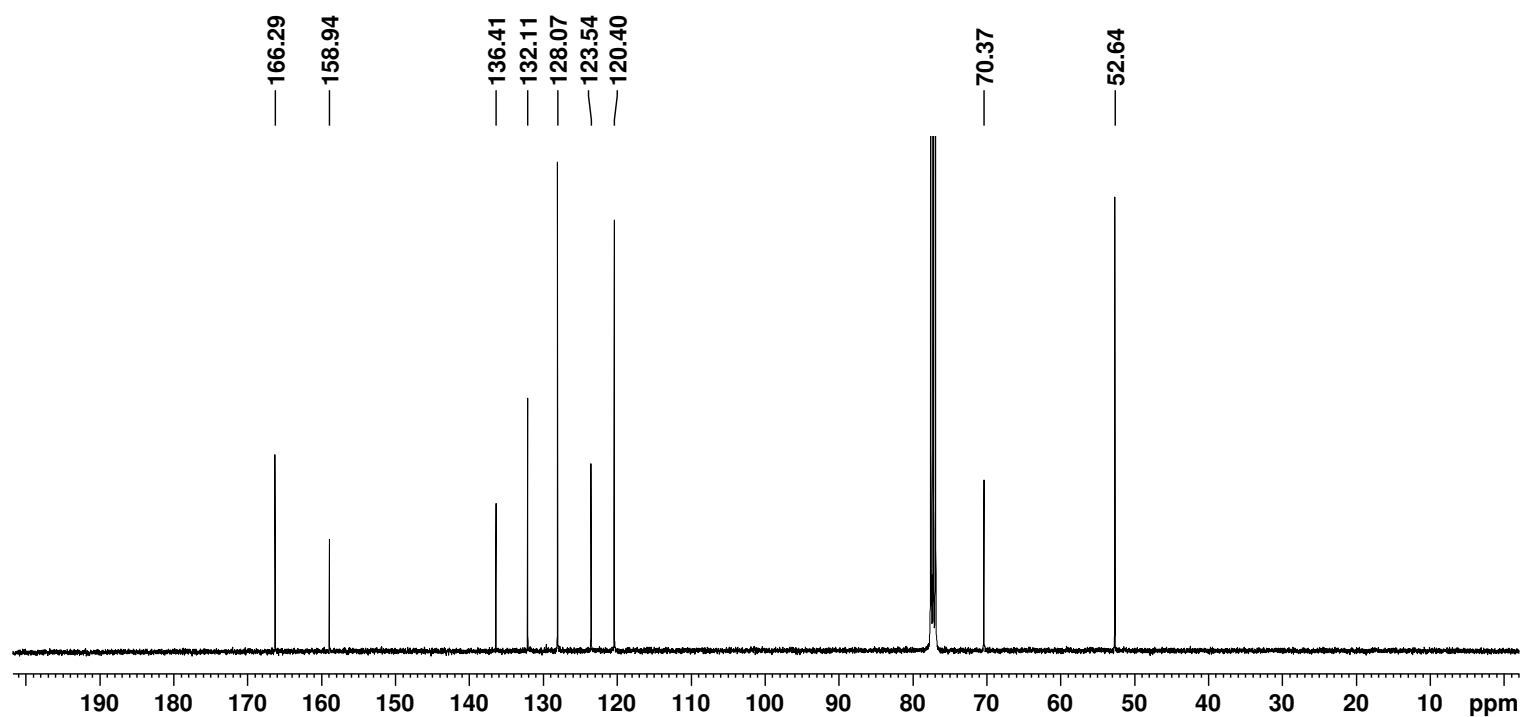

Figure S124. 125 MHz carbon-13 NMR spectrum of dimer **16c** in  $\text{CDCl}_3$ .

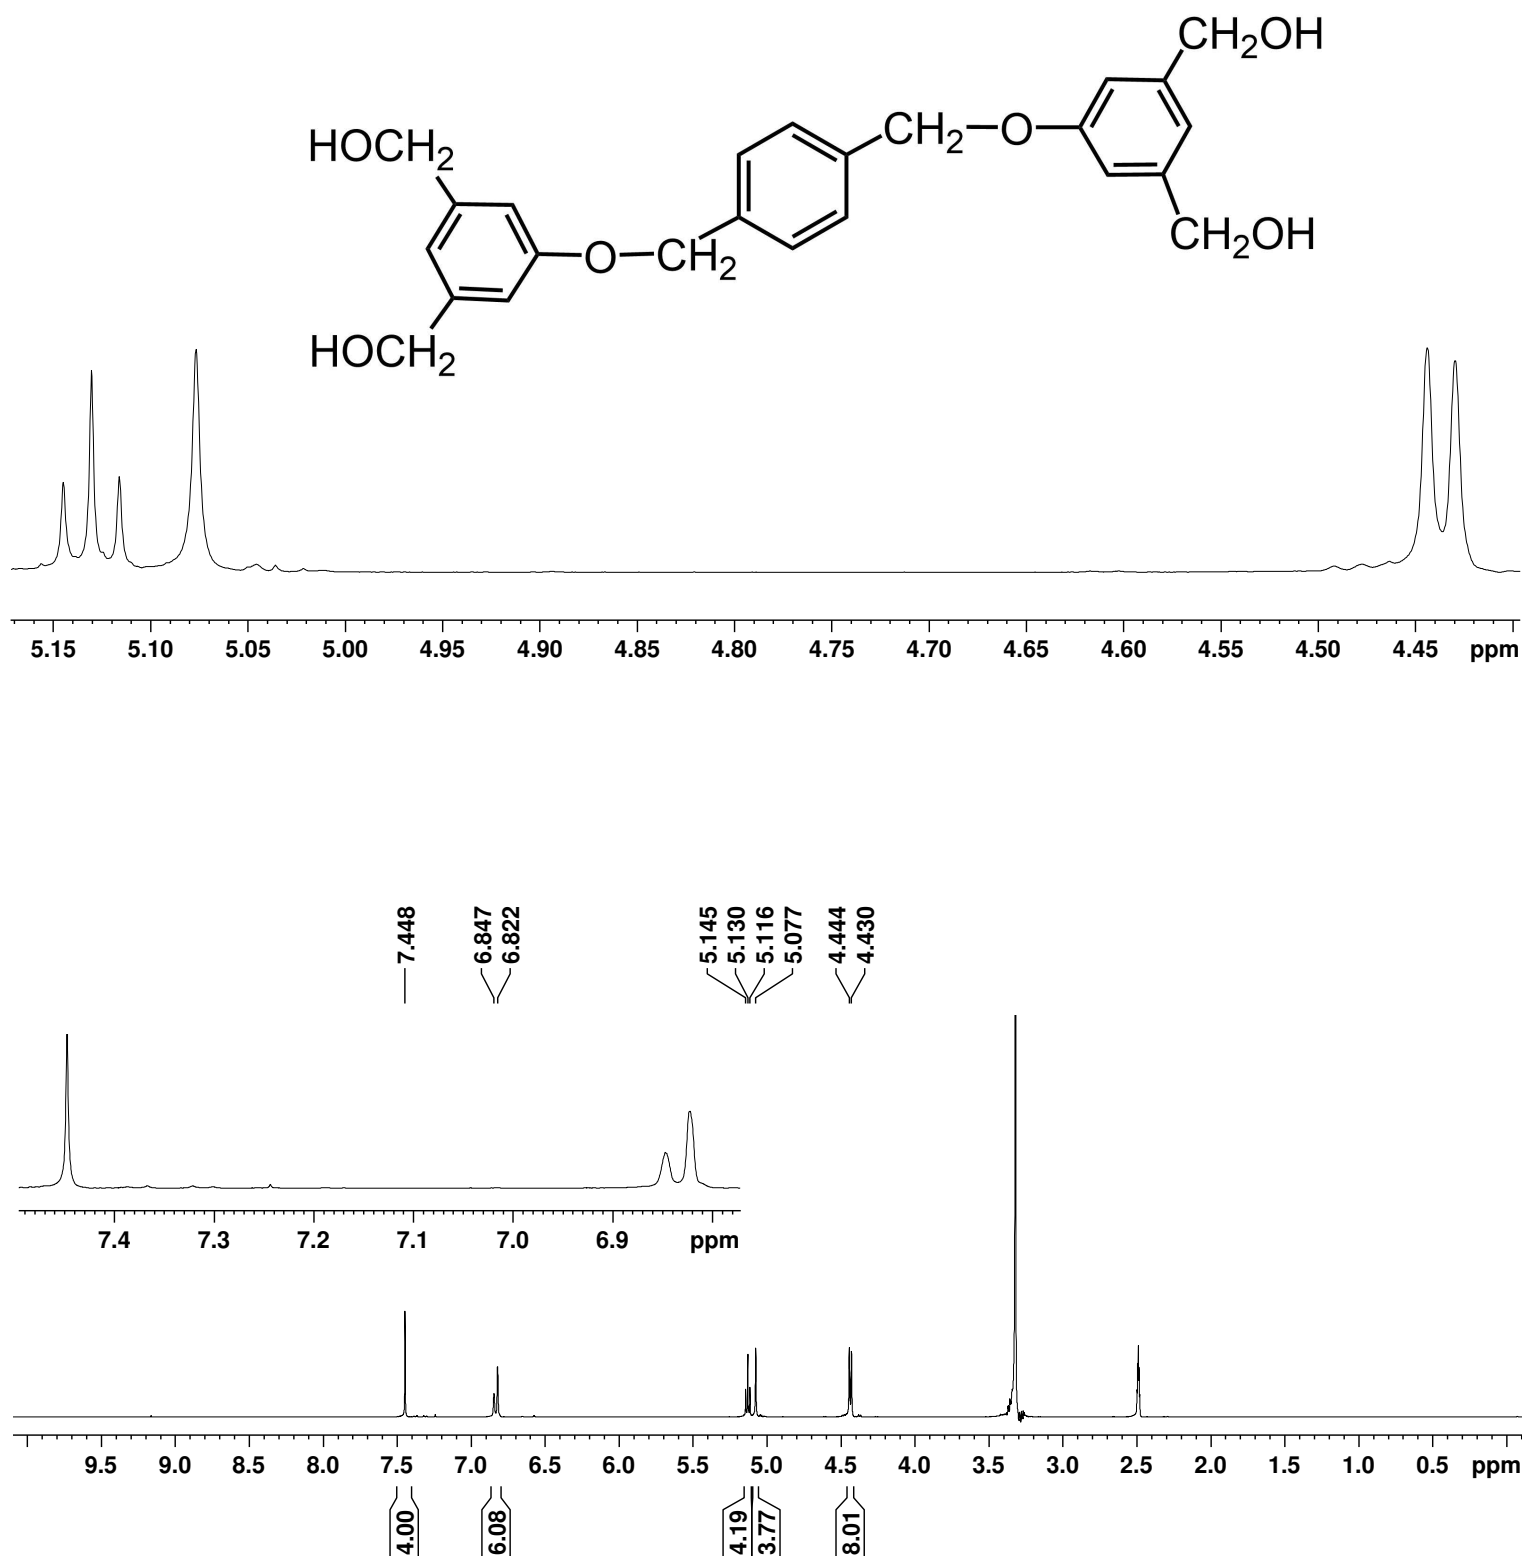

Figure S125. 400 MHz proton NMR spectrum of tetra-alcohol **17c** in DMSO- $d_6$ .

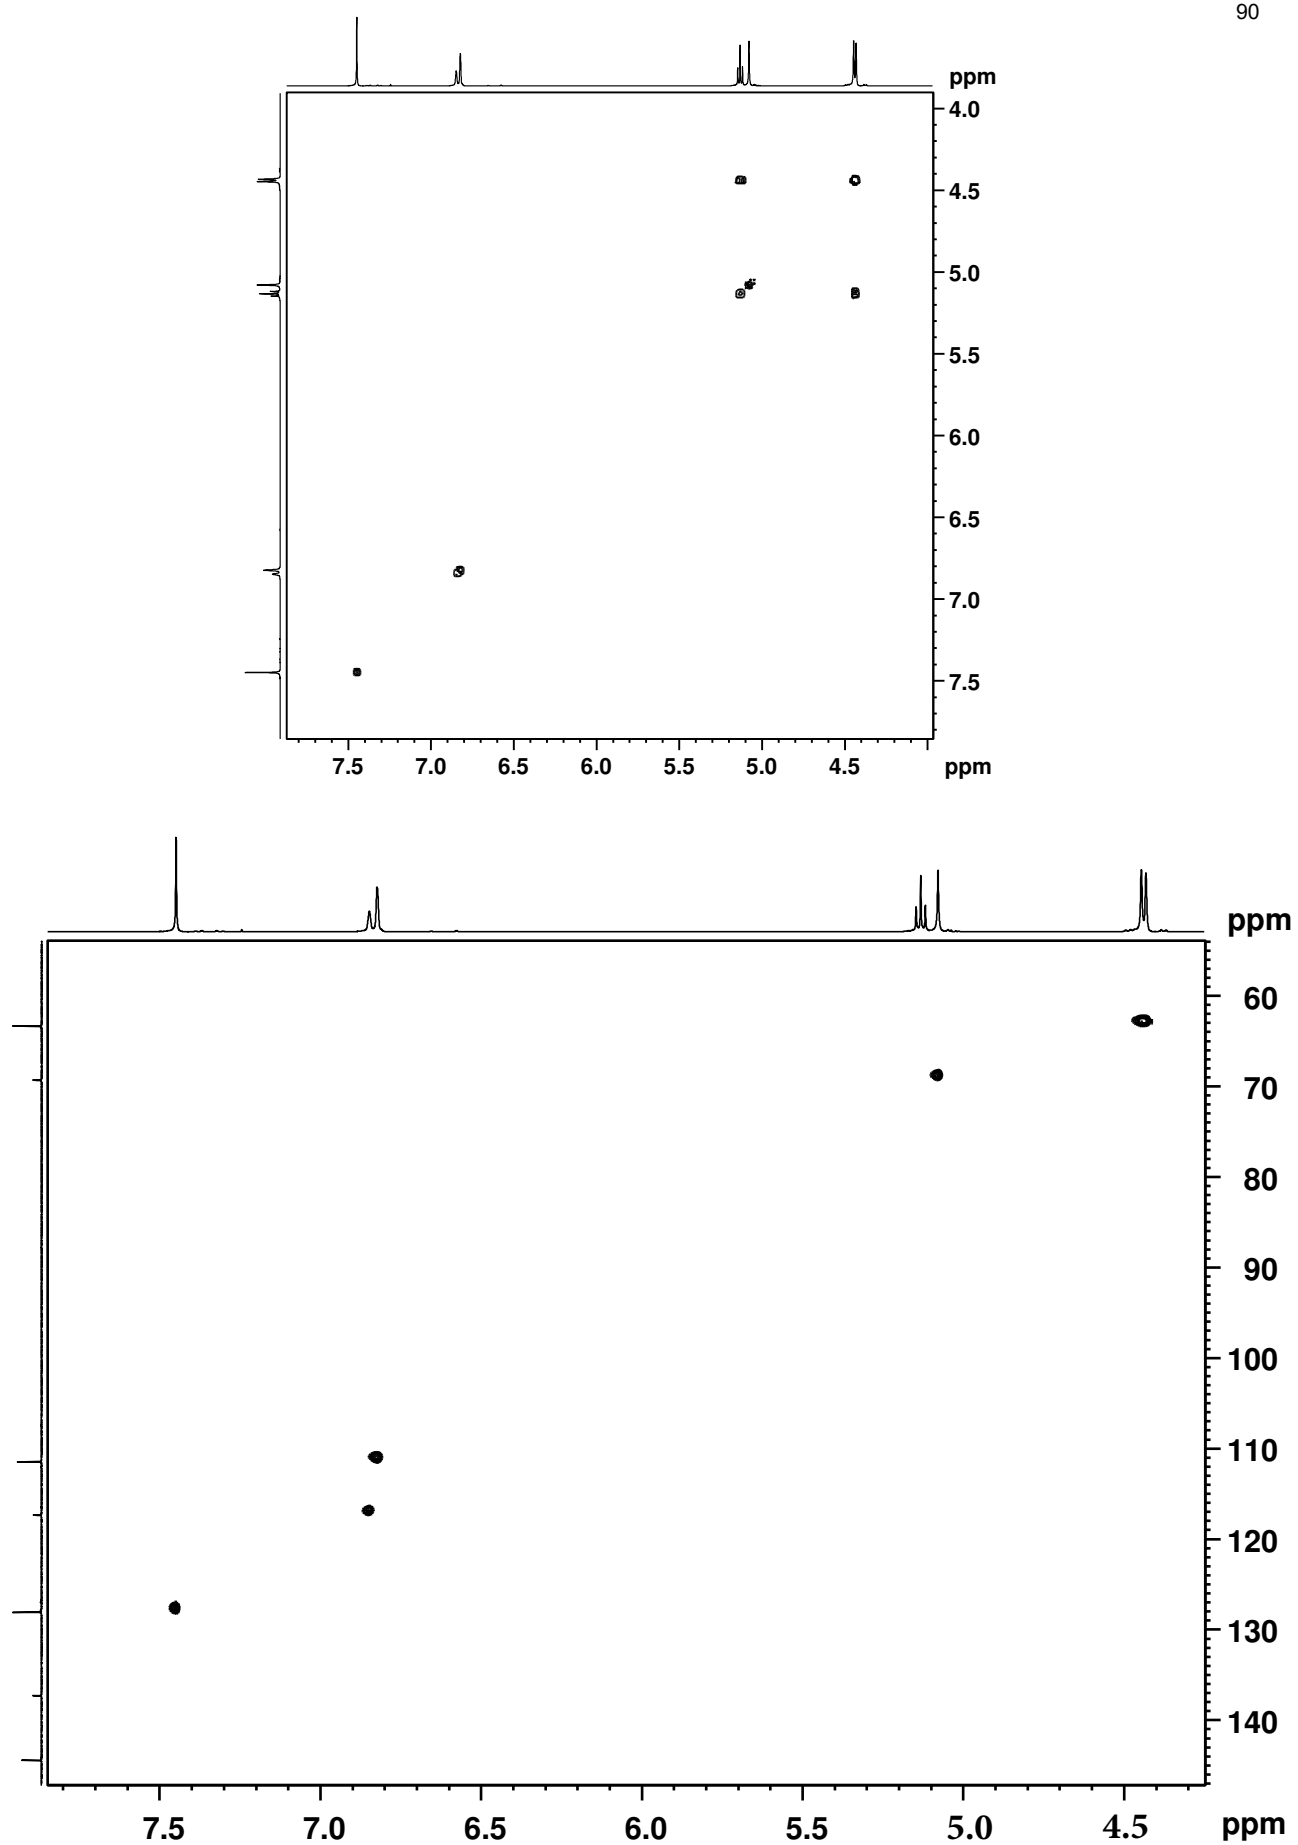

Figure S126.  $^1\text{H}$ - $^1\text{H}$  COSY (top) and HSQC (bottom) NMR spectra of tetra-alcohol **17c** in DMSO- $d_6$ .

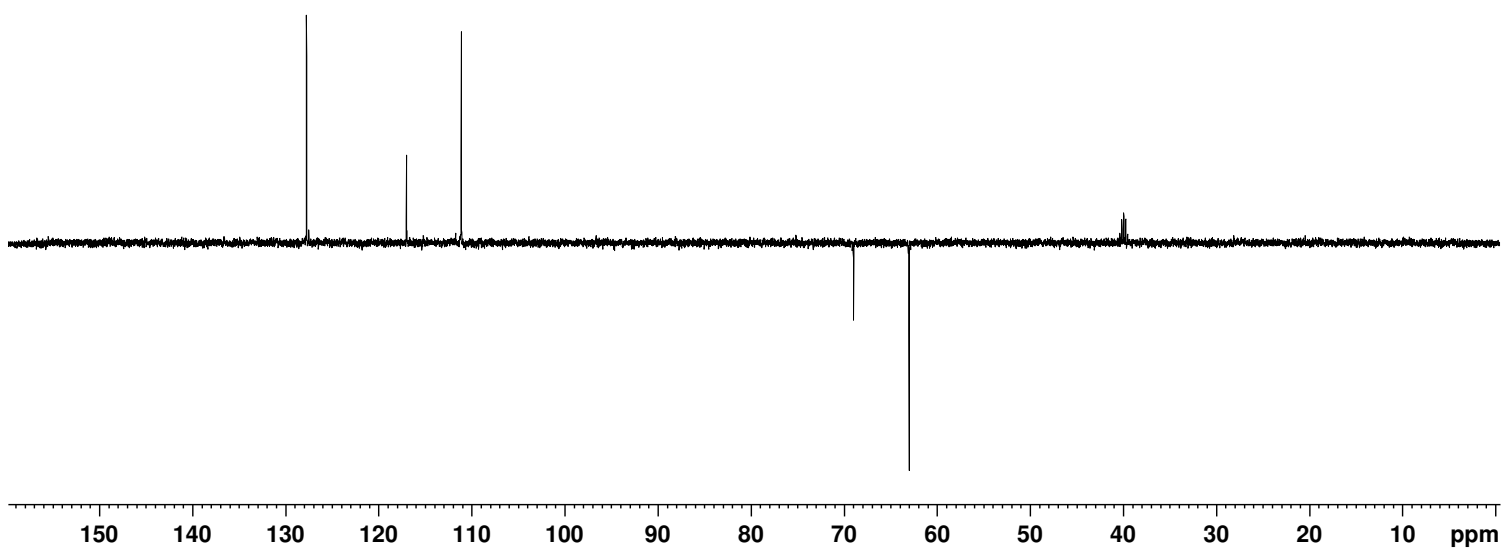

Figure S127. DEPT-135 NMR spectrum of tetra-alcohol **17c** in DMSO- $d_6$ .

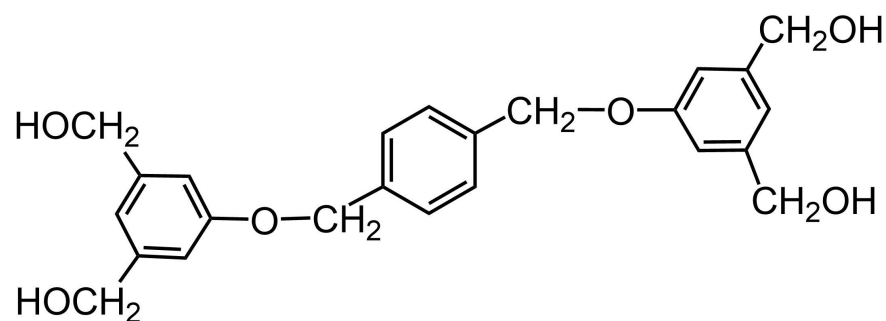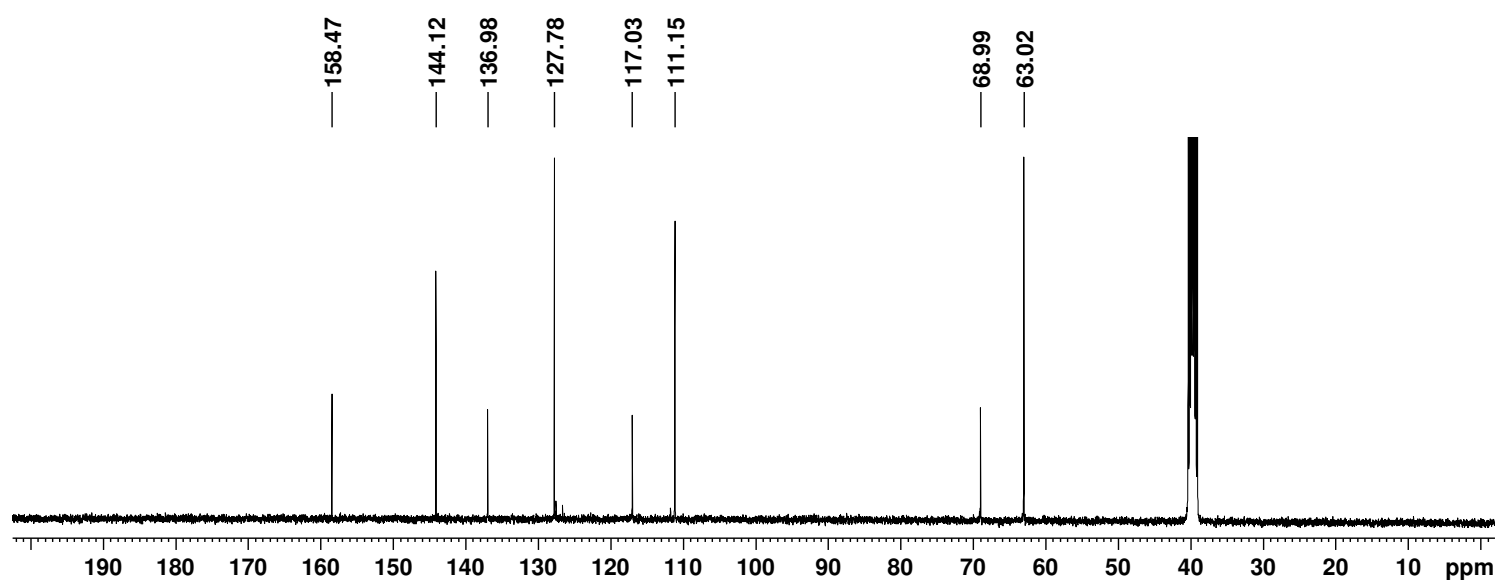

Figure S128. 100 MHz carbon-13 NMR spectrum of tetra-alcohol **17c** in DMSO- $d_6$ .

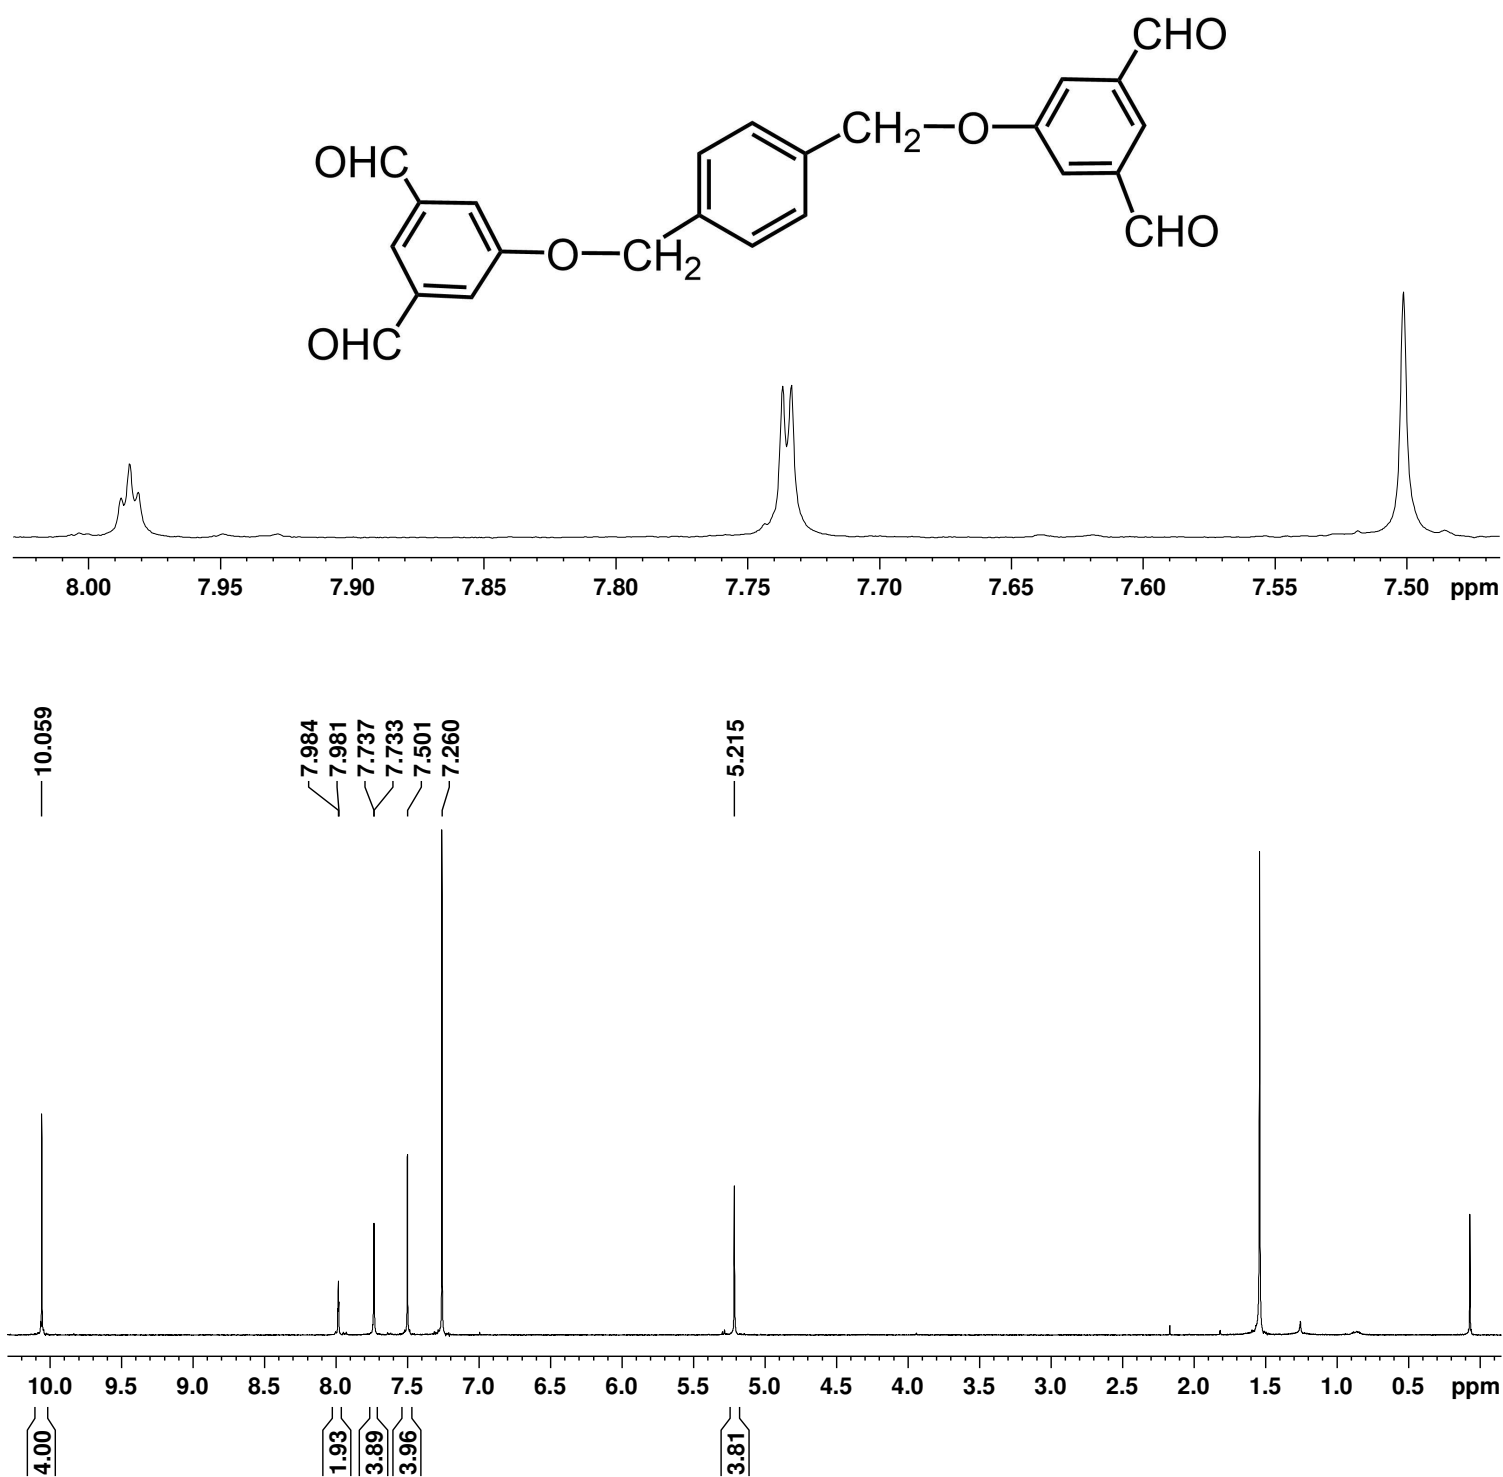

Figure S129. Proton NMR spectrum of *p*-phenylene-linked tetraaldehyde in CDCl<sub>3</sub>.



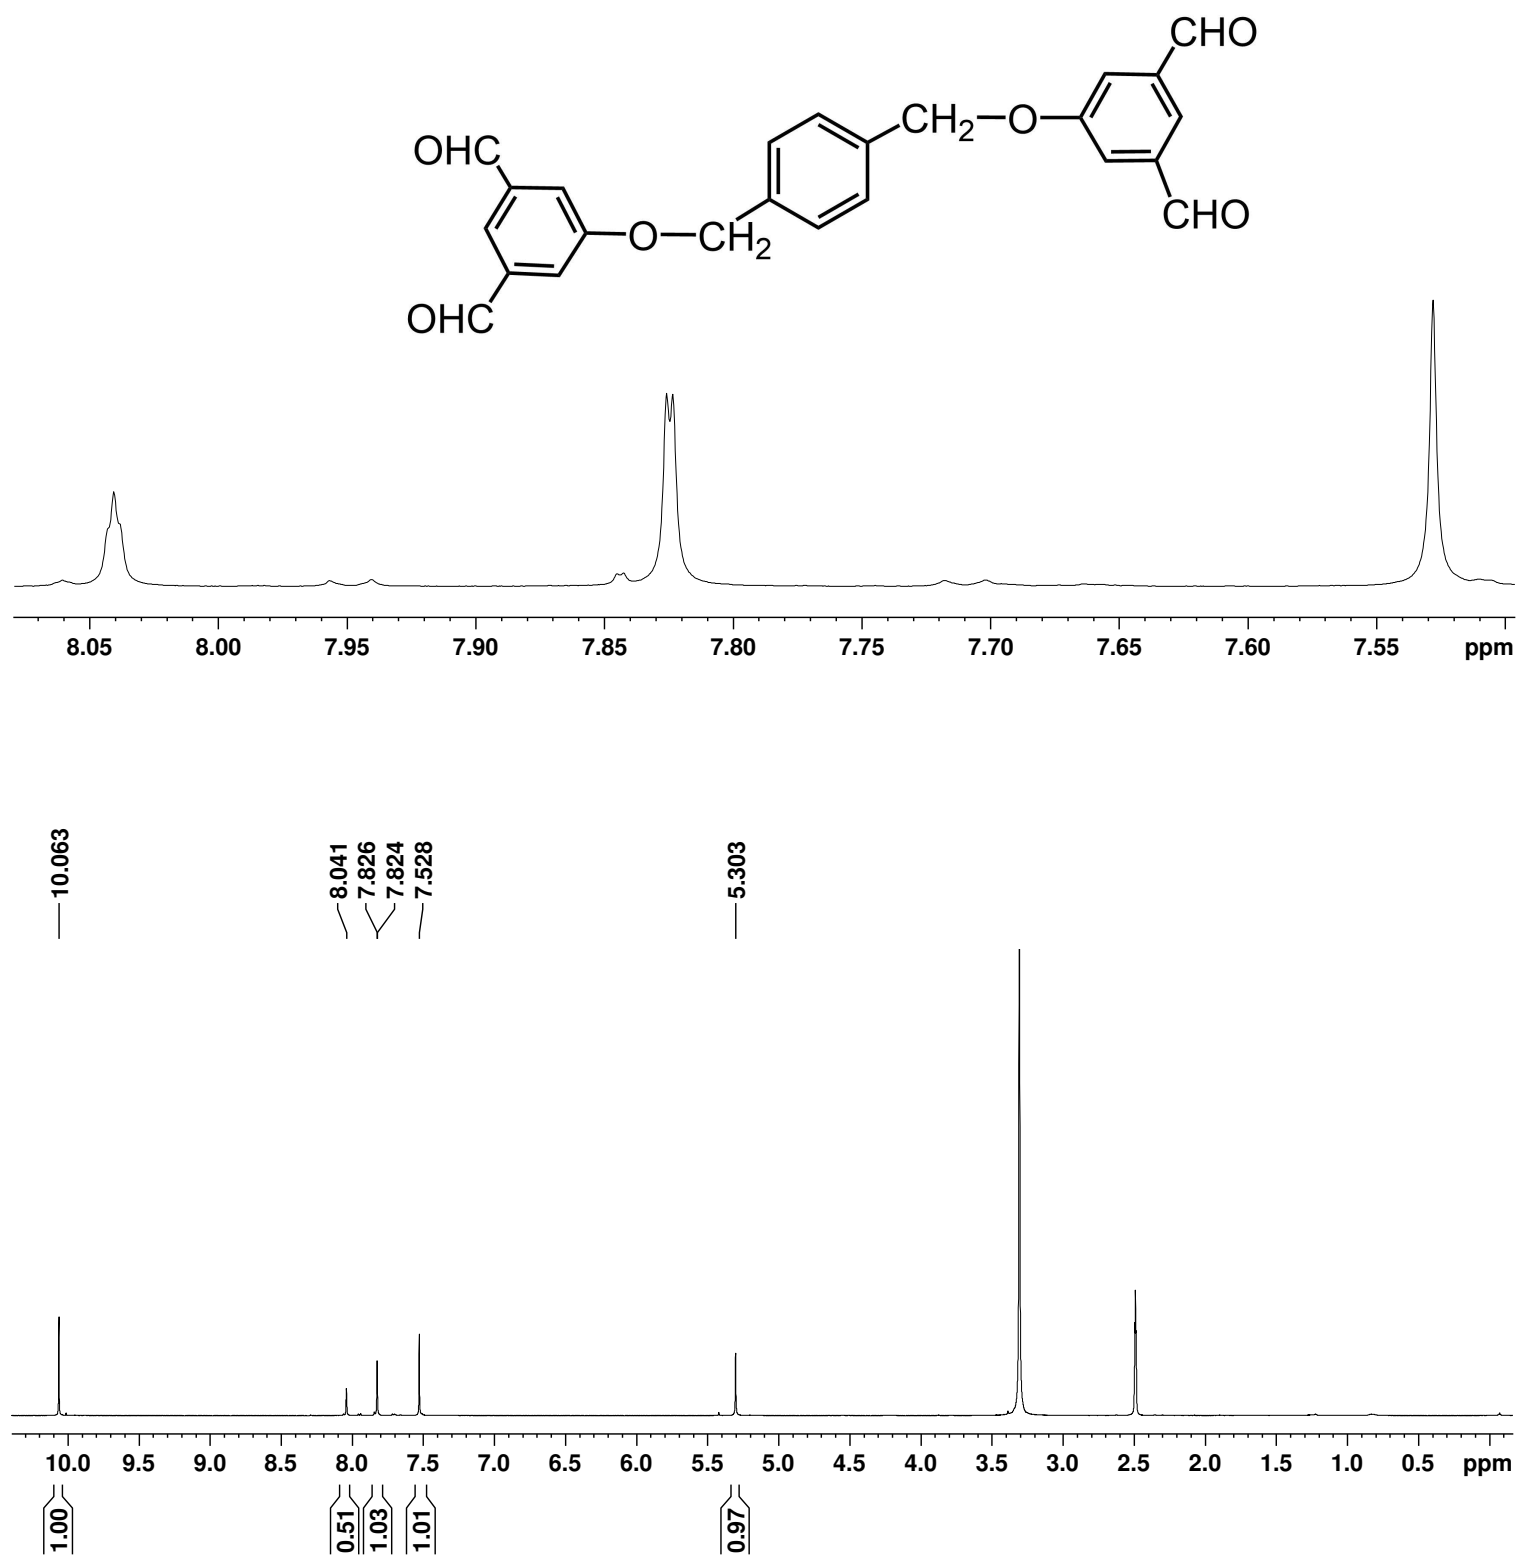

Figure S130. Proton NMR spectrum of *p*-phenylene-linked tetraaldehyde **18c** in DMSO- $d_6$ .

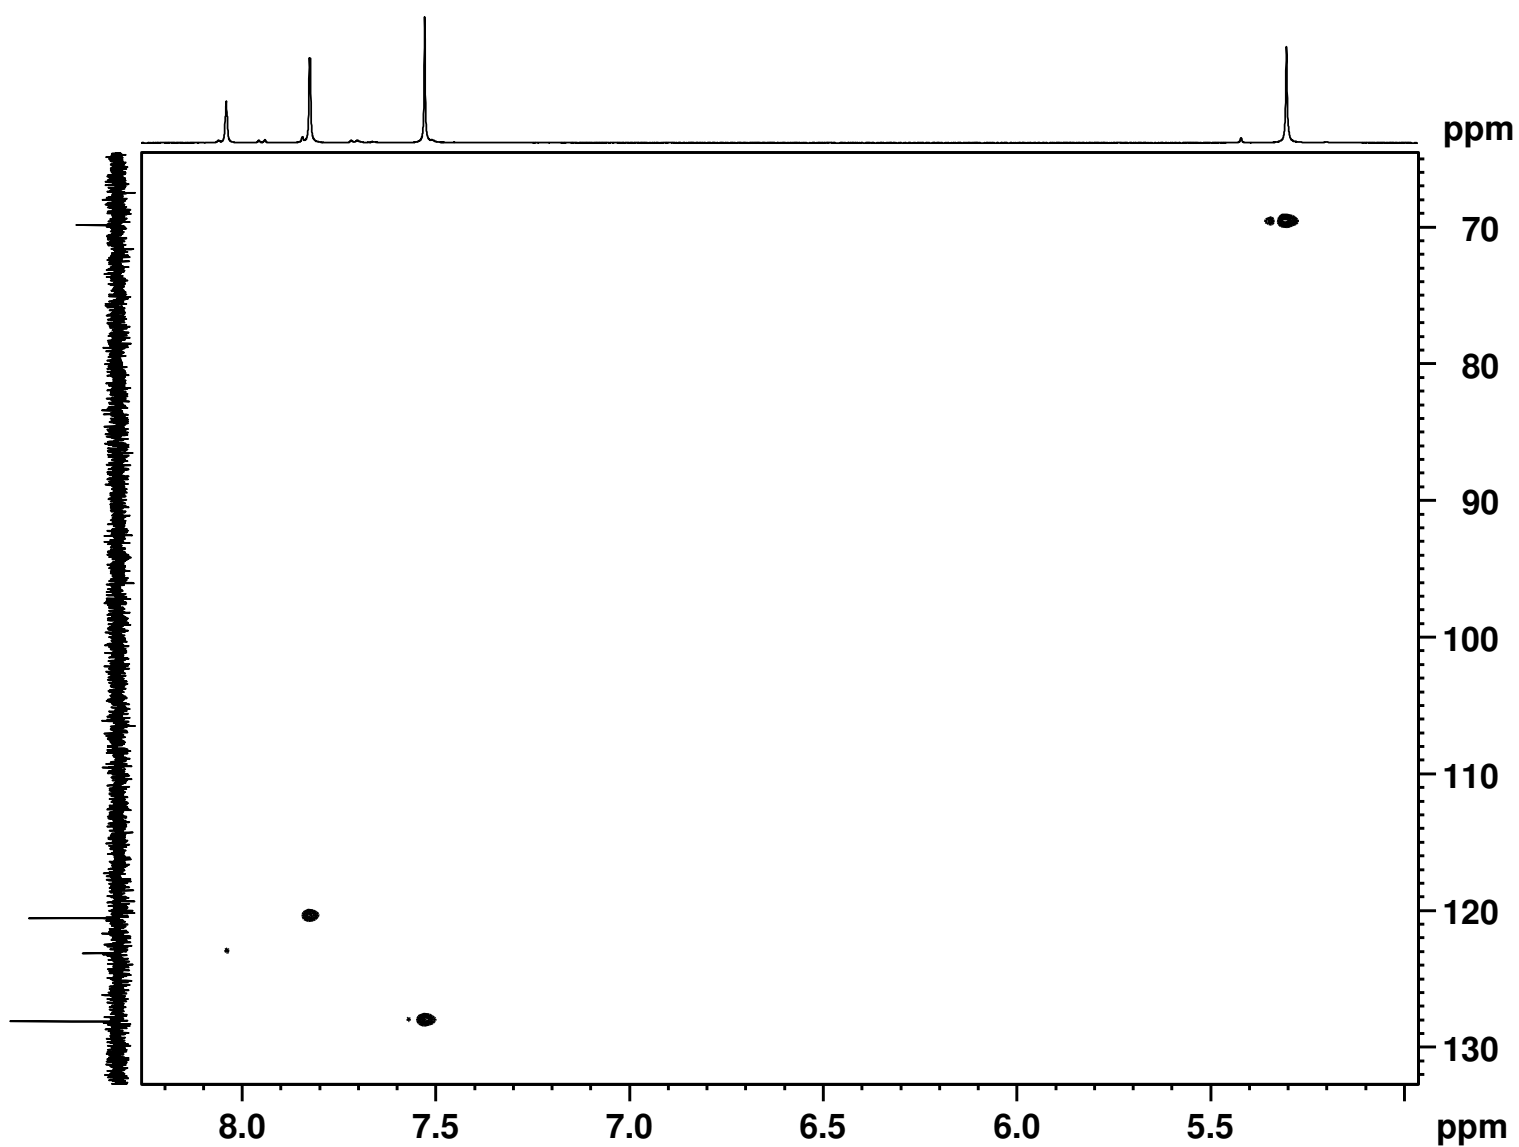

Figure S131.  $^1\text{H}$ - $^1\text{H}$  COSY NMR spectrum of *p*-phenylene-linked tetraaldehyde **18c** in  $\text{DMSO}-d_6$ .

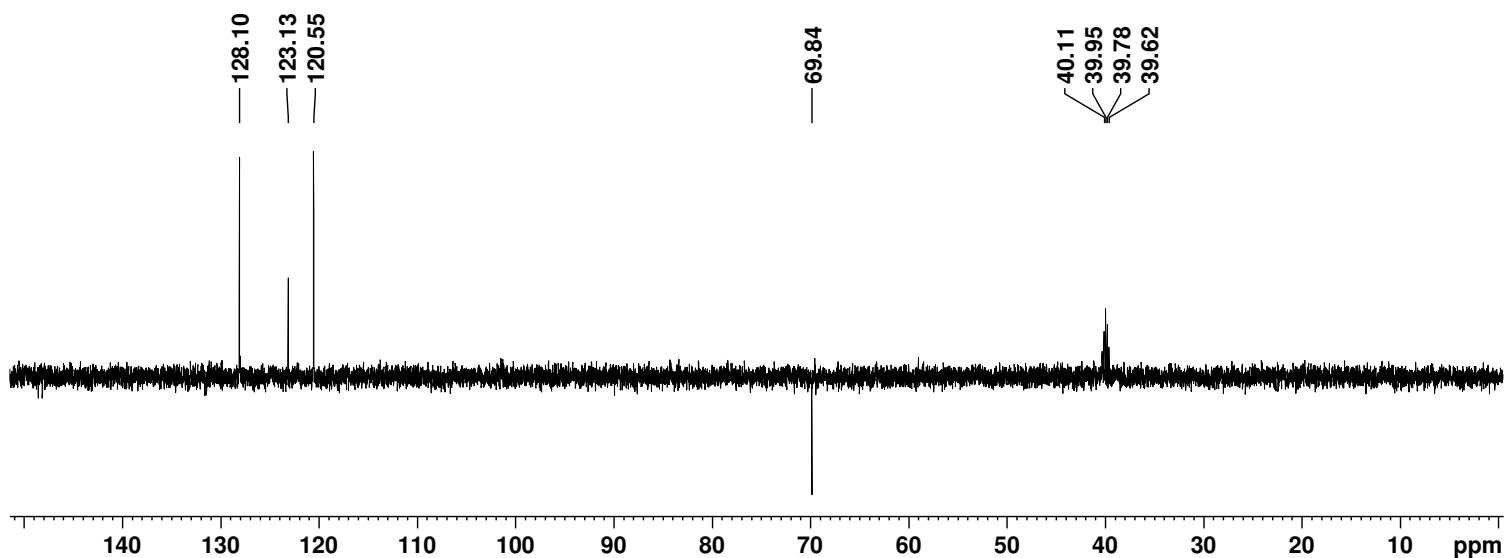

Figure S132. DEPT-135 NMR spectrum of *p*-phenylene-linked tetraaldehyde **18c** in DMSO-*d*<sub>6</sub>.

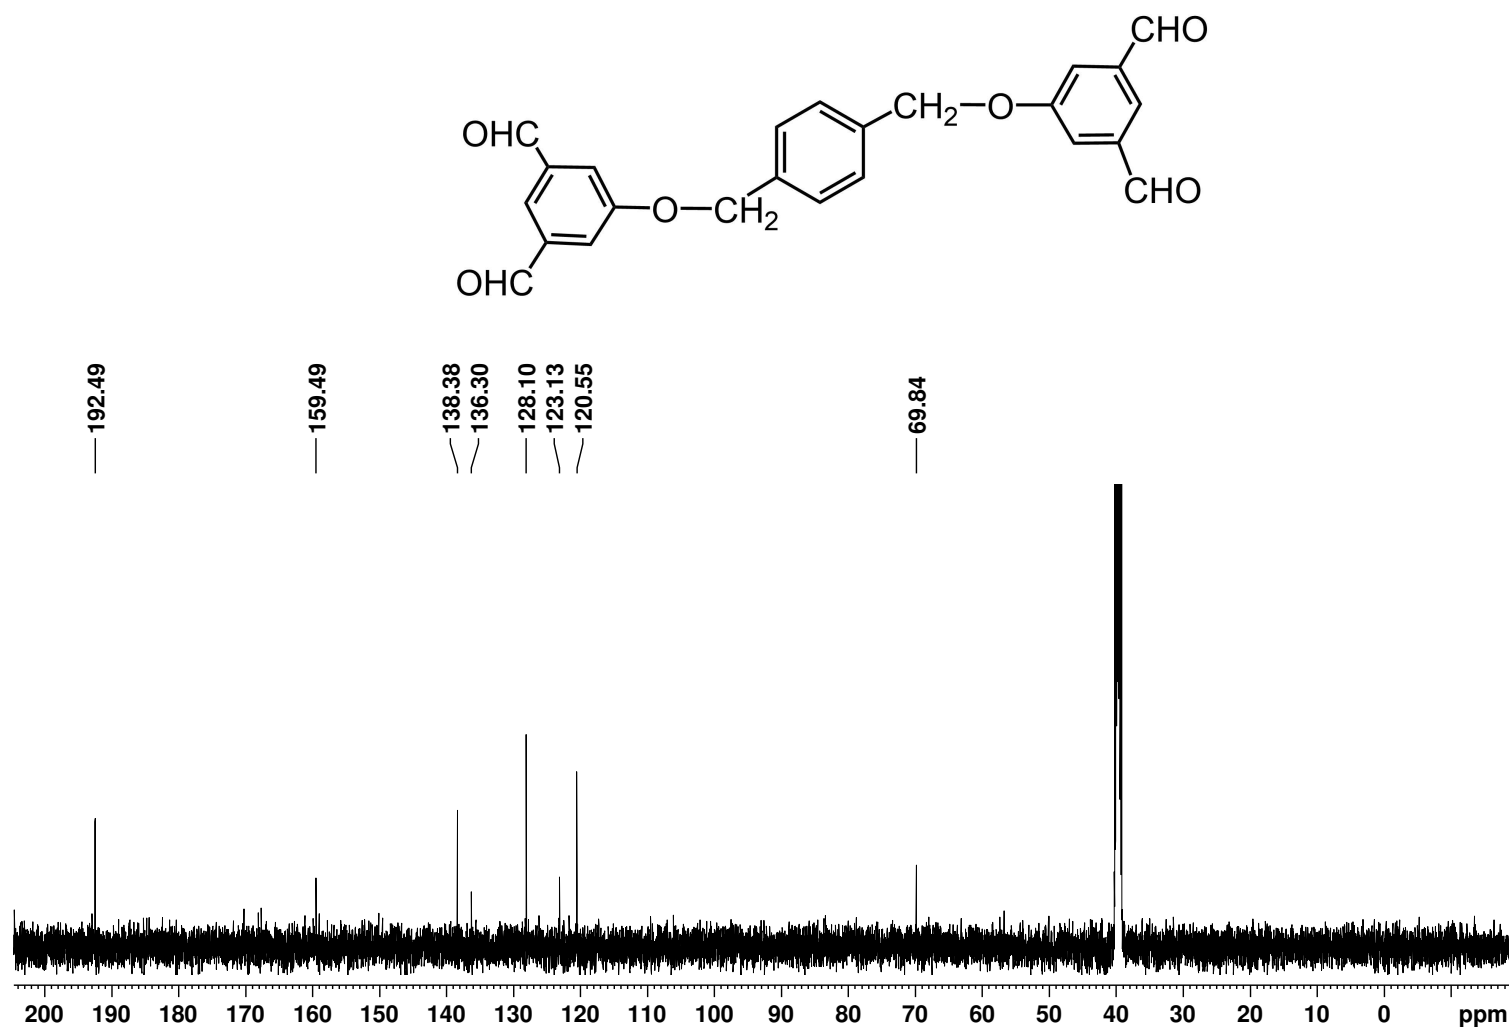

Figure S133. 100 MHz carbon-13 NMR spectrum of *p*-phenylene-linked tetraaldehyde **18c** in DMSO-*d*<sub>6</sub>.

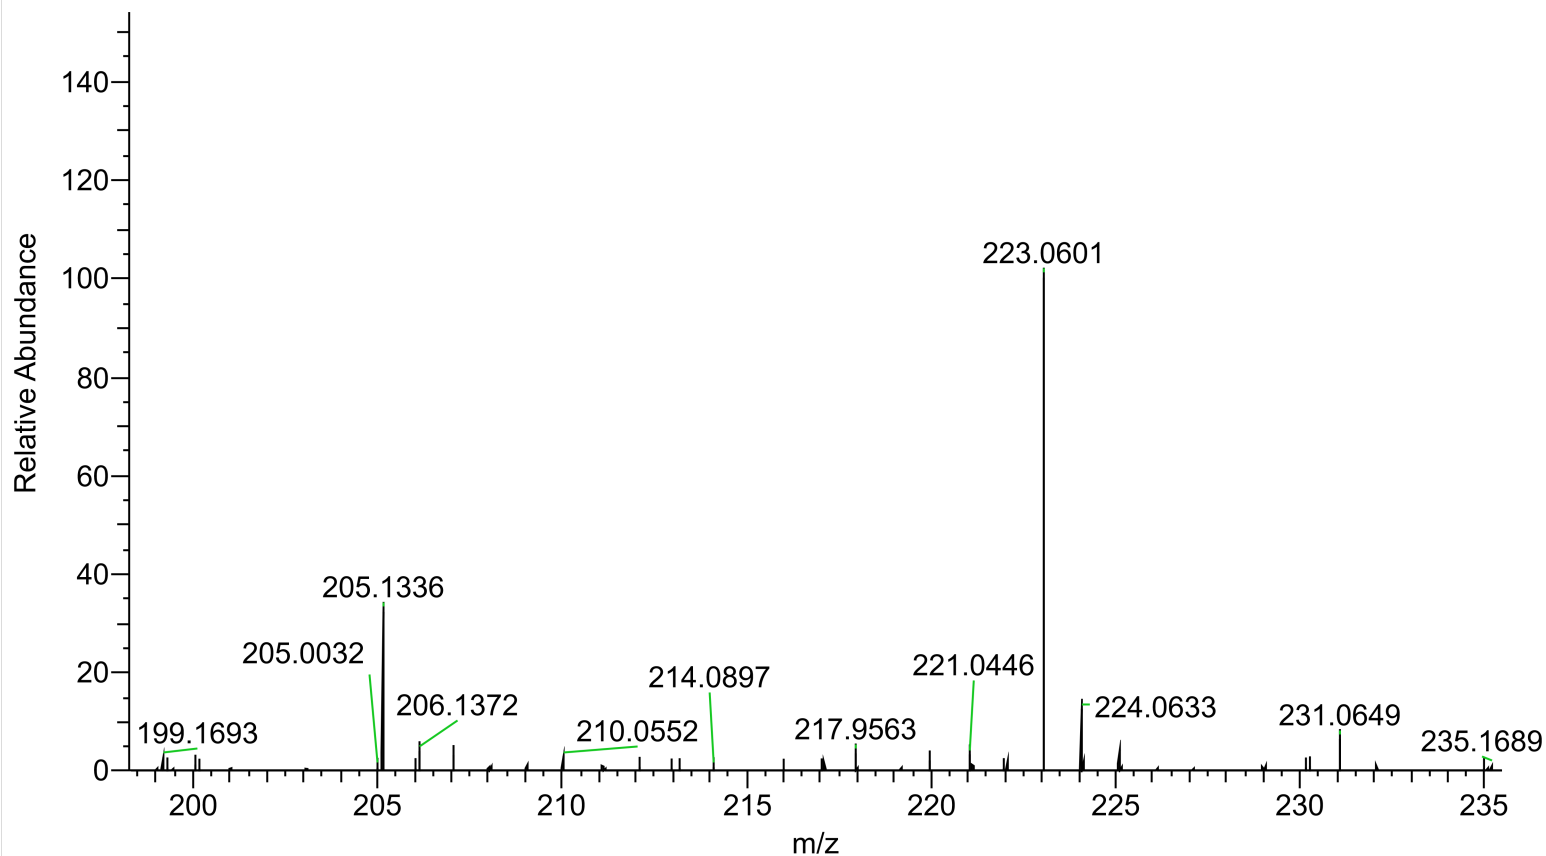

Figure S134. High resolution time-of-flight electrospray ionization mass spectrum of dialdehyde **8c**.

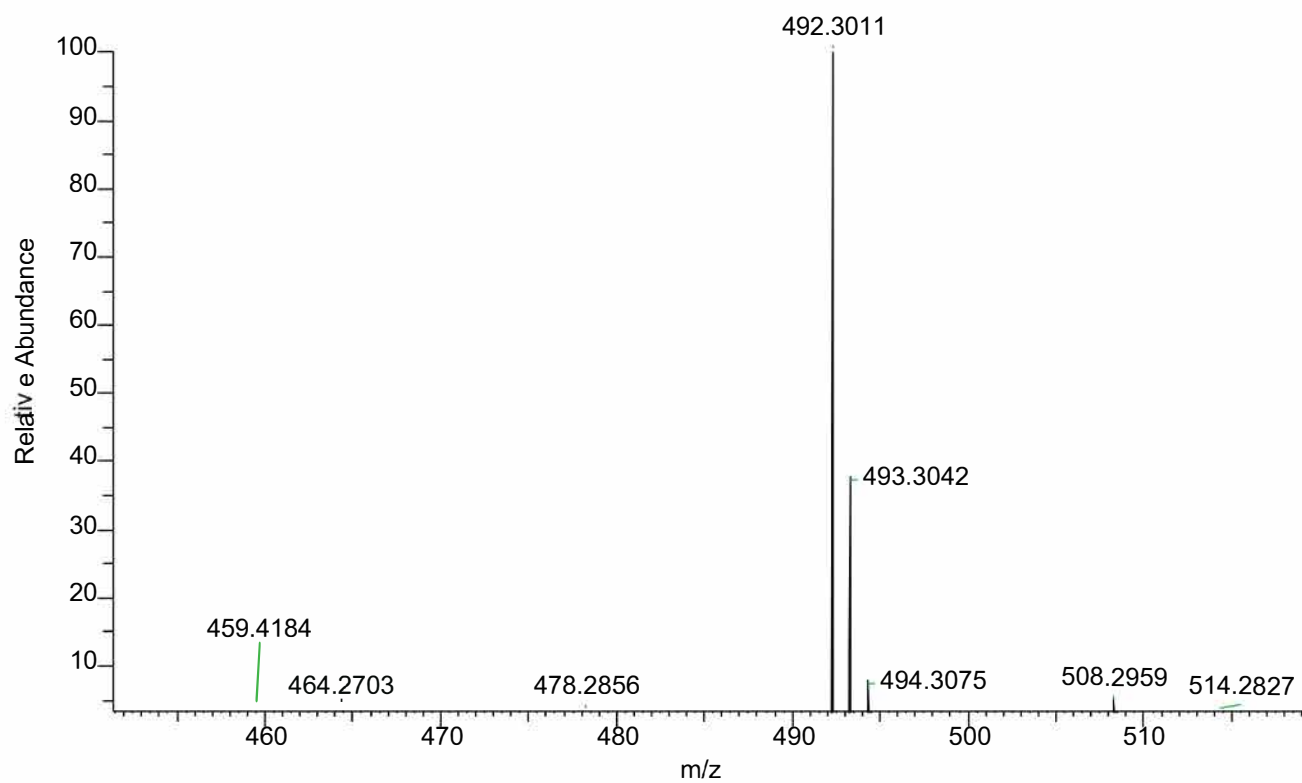

Figure S135. High resolution time-of-flight electrospray ionization mass spectrum of methoxybenziporphyrin **7a**.

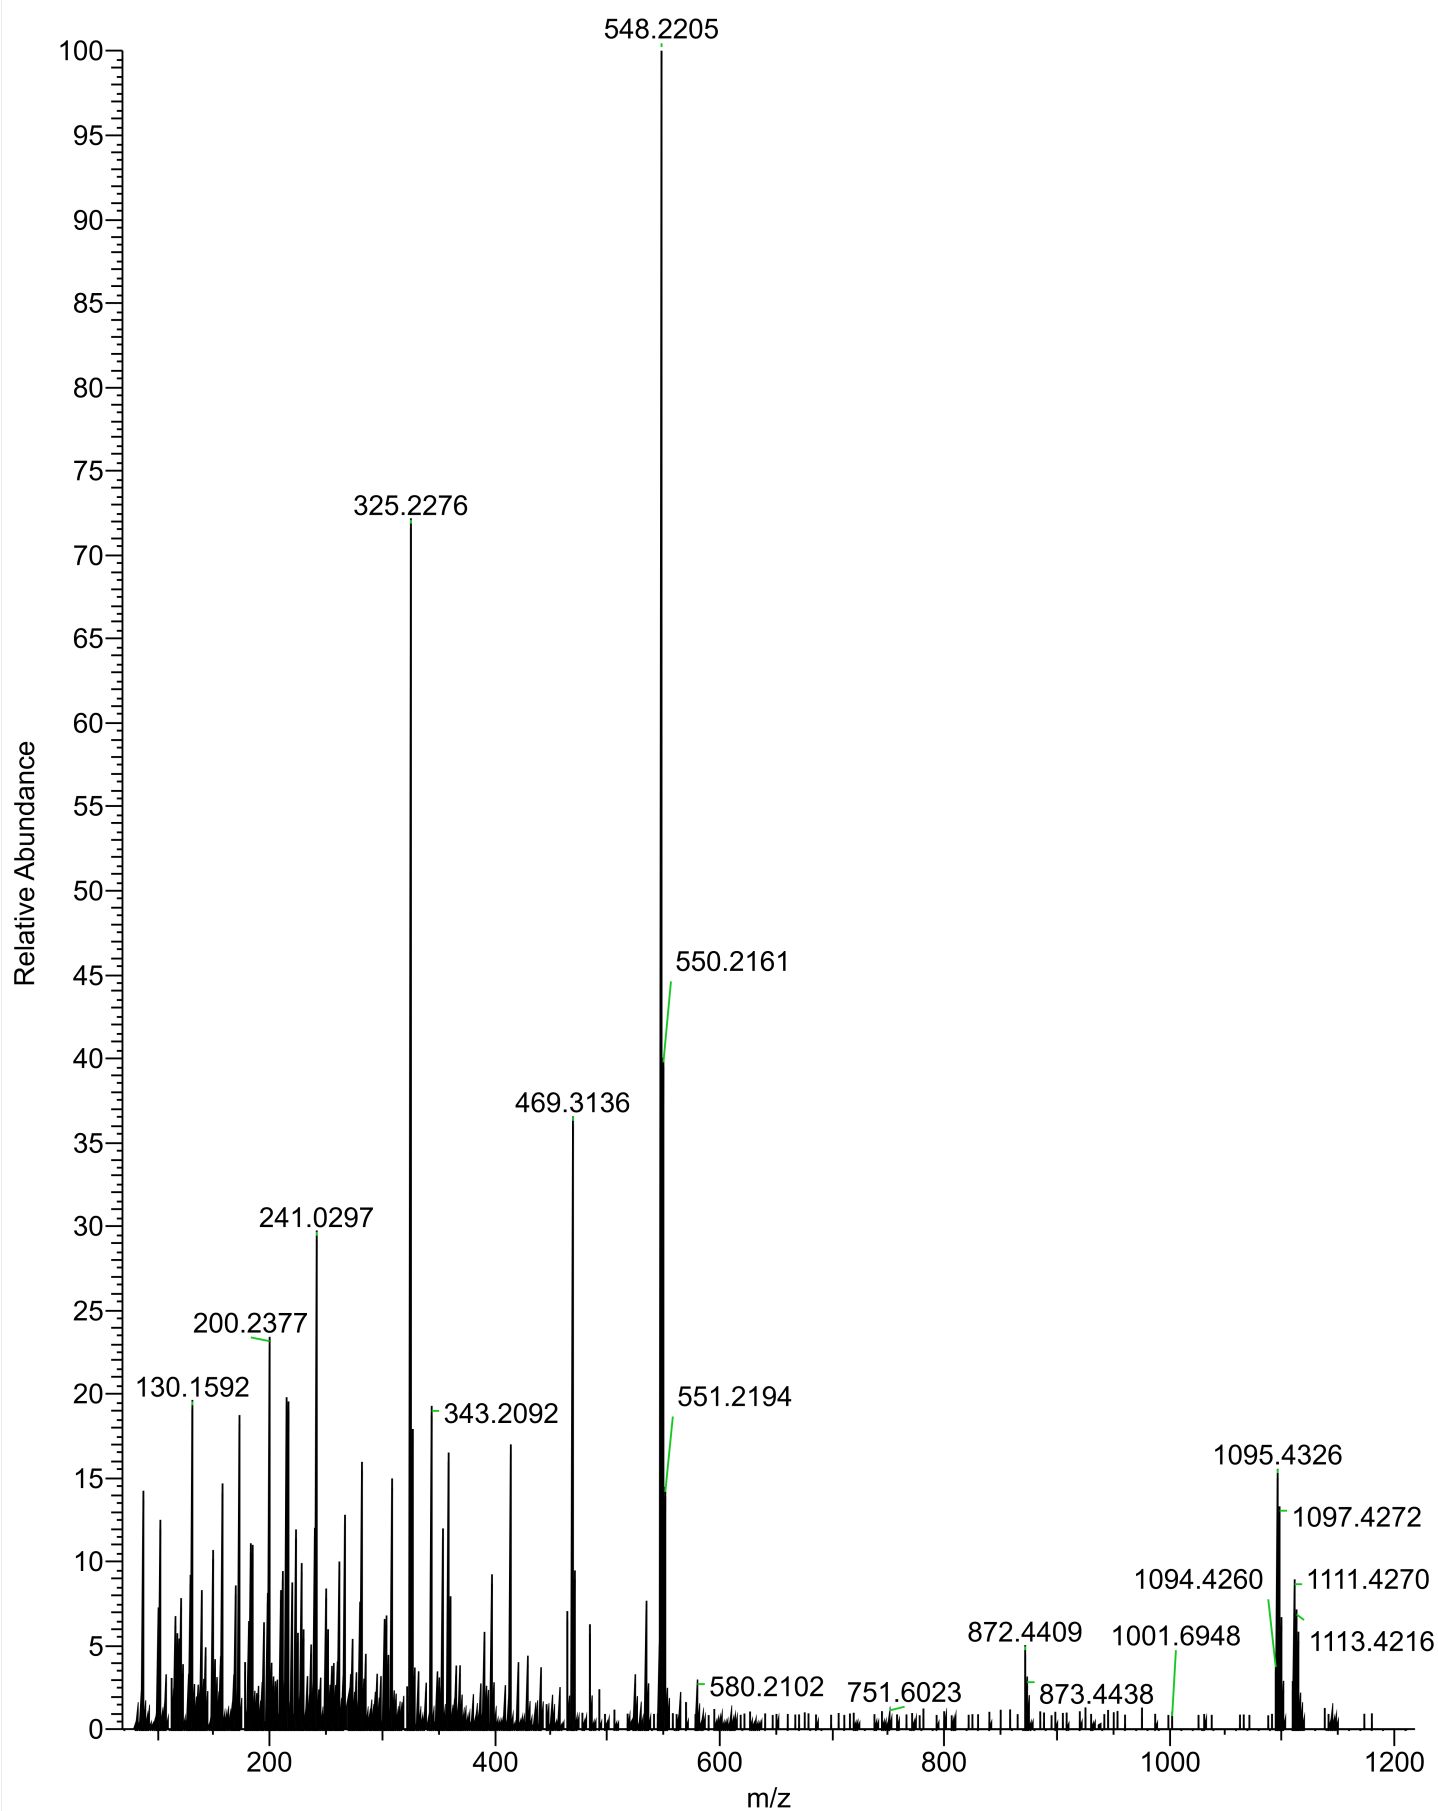

Figure S136. High resolution time-of-flight electrospray ionization mass spectrum of nickel complex **7aNi**.

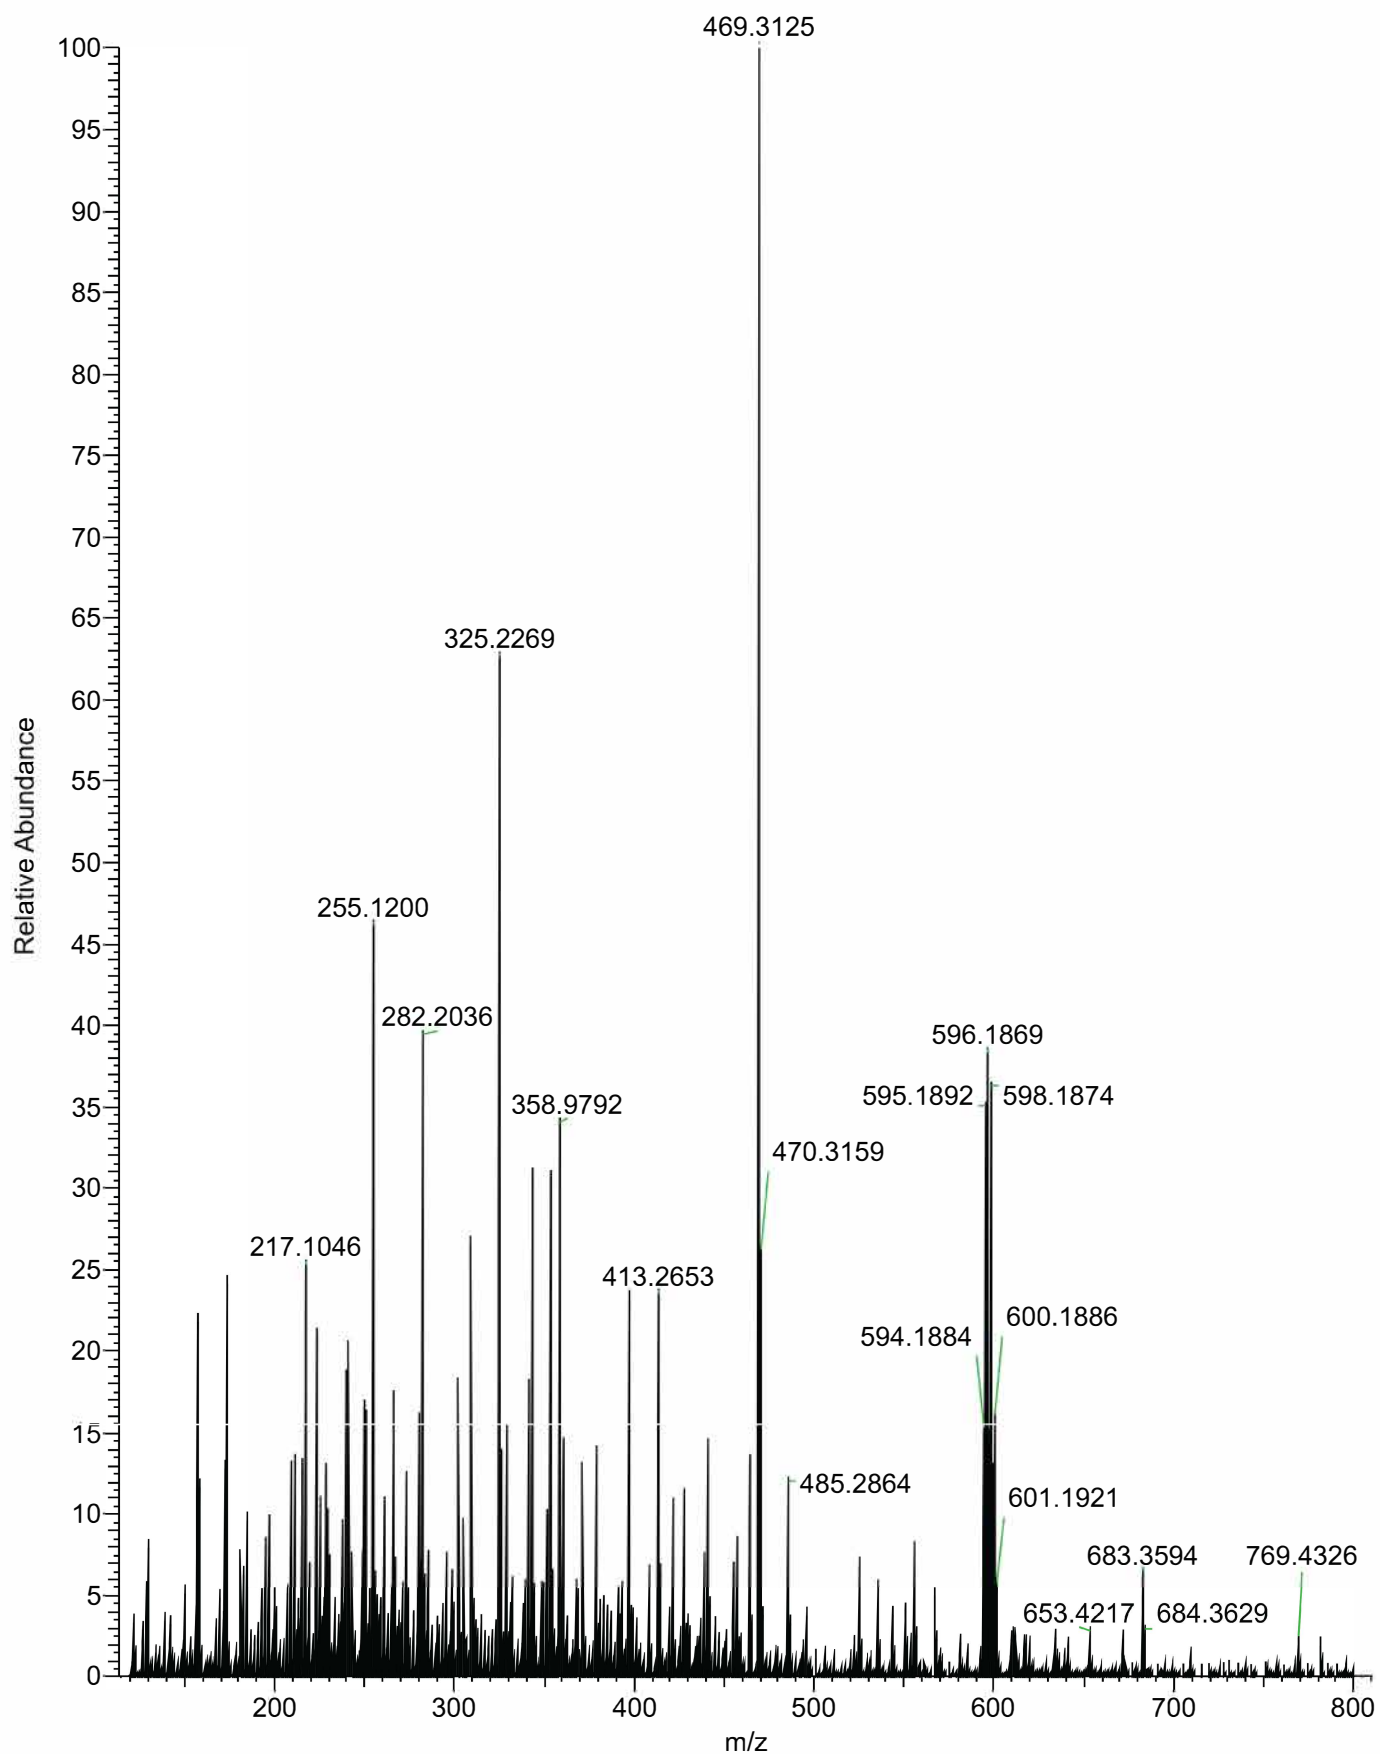

Figure S137. High resolution time-of-flight electrospray ionization mass spectrum of palladium complex **7aPd**.

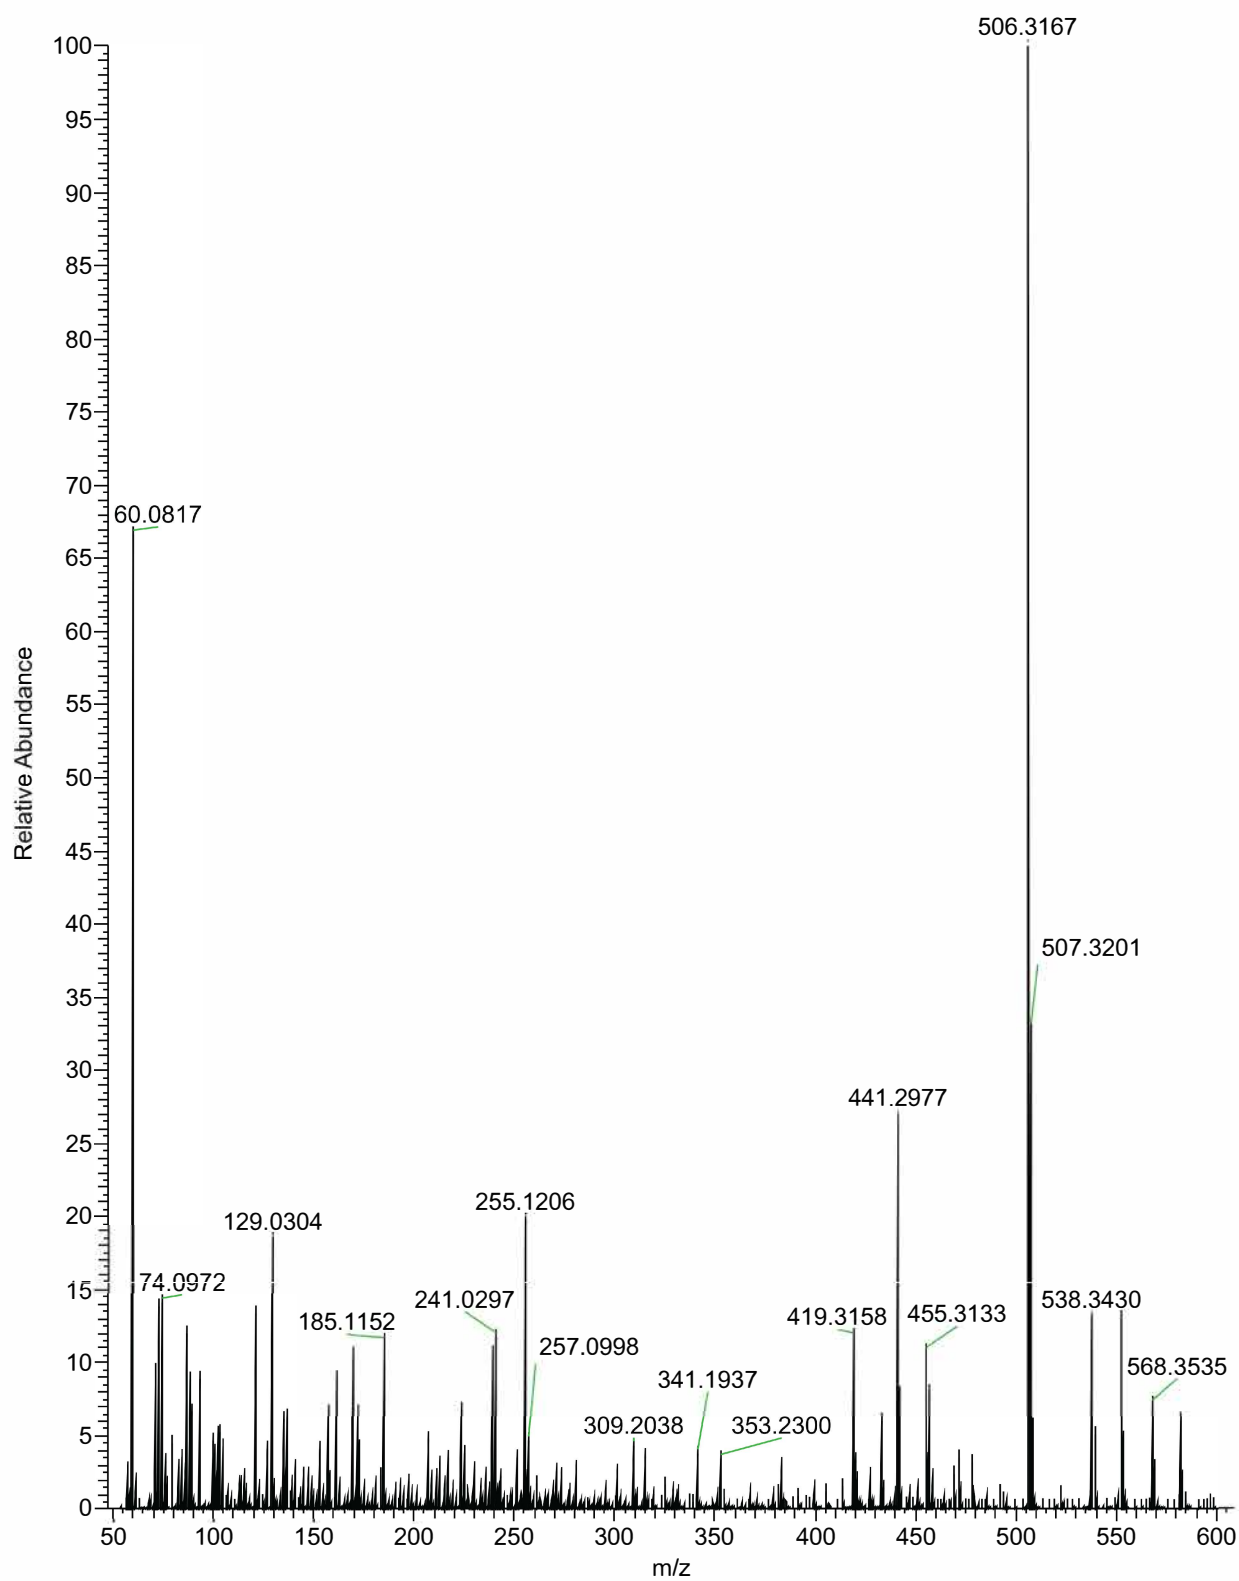

Figure S138. High resolution time-of-flight electrospray ionization mass spectrum of ethoxybenziporphyrin **7b**.

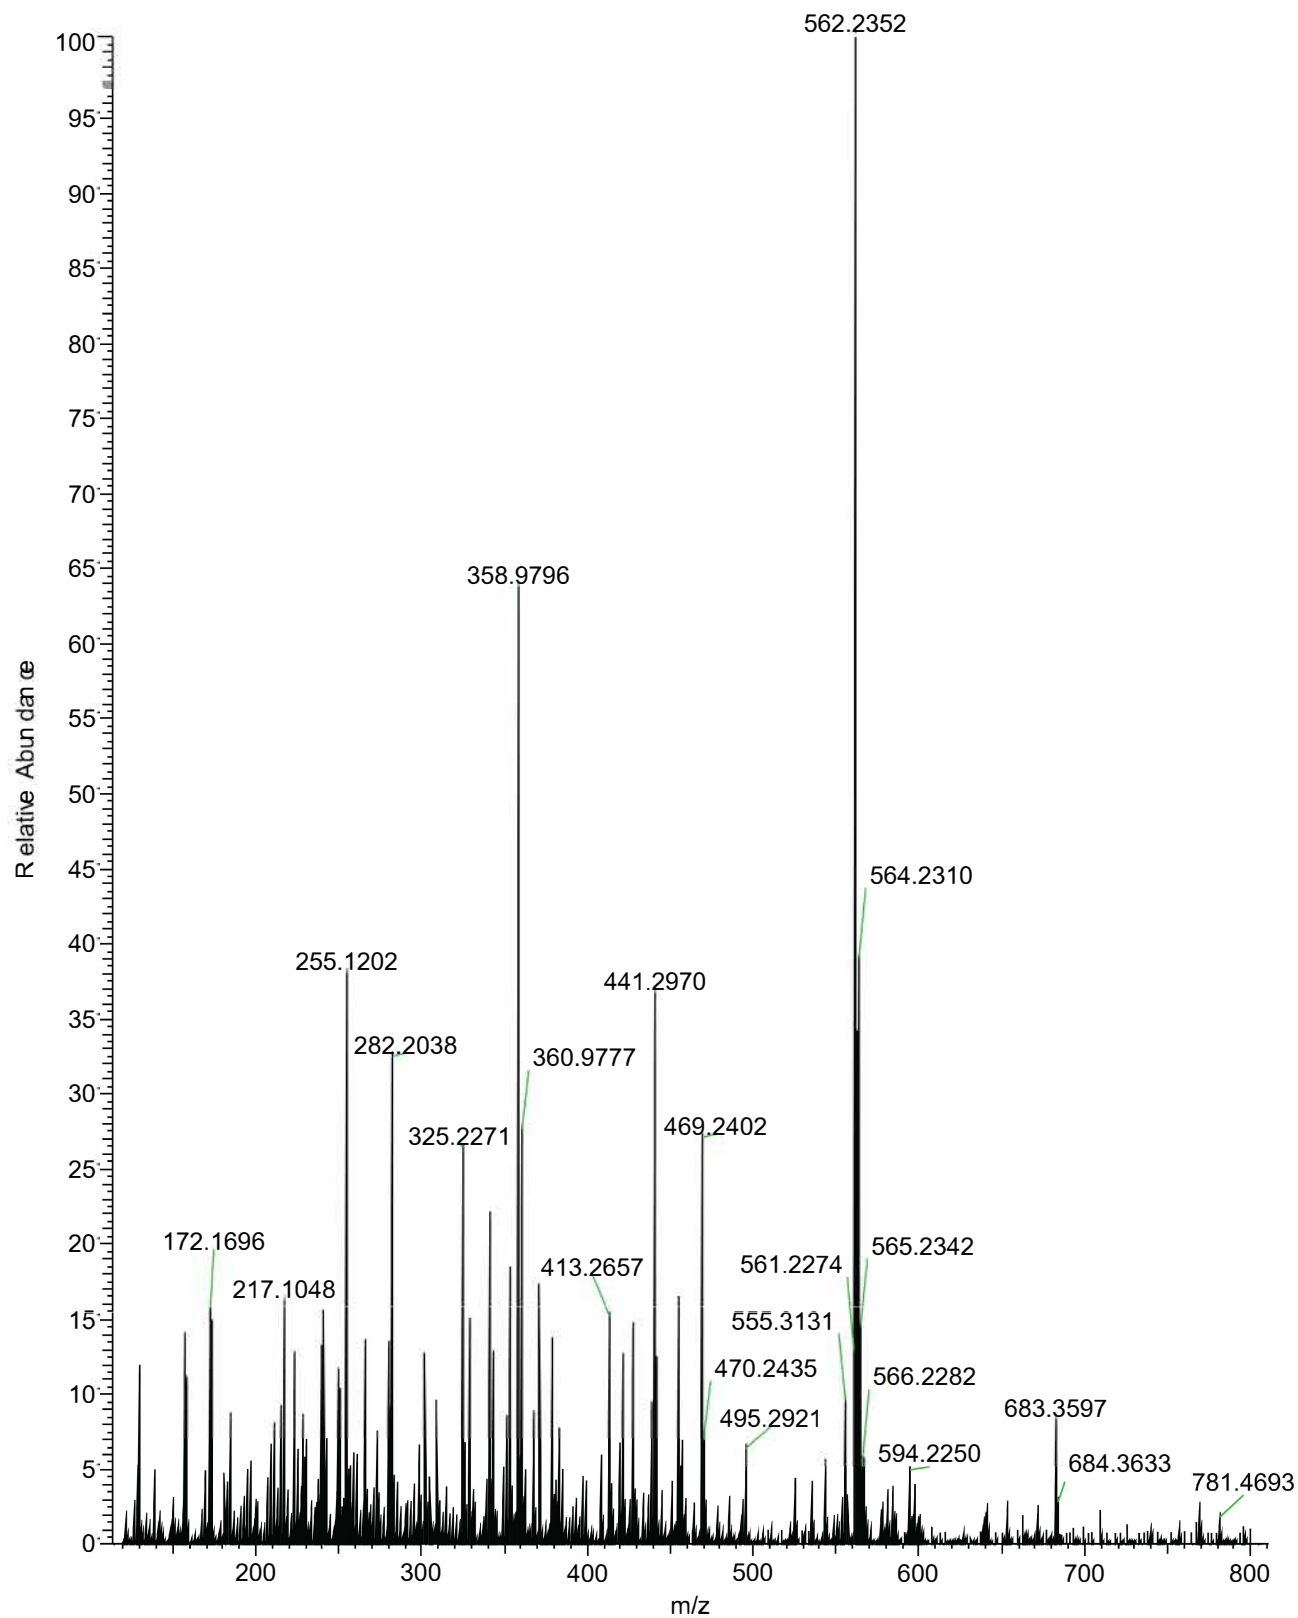

Figure S139. High resolution time-of-flight electrospray ionization mass spectrum of nickel complex **7bNi**.



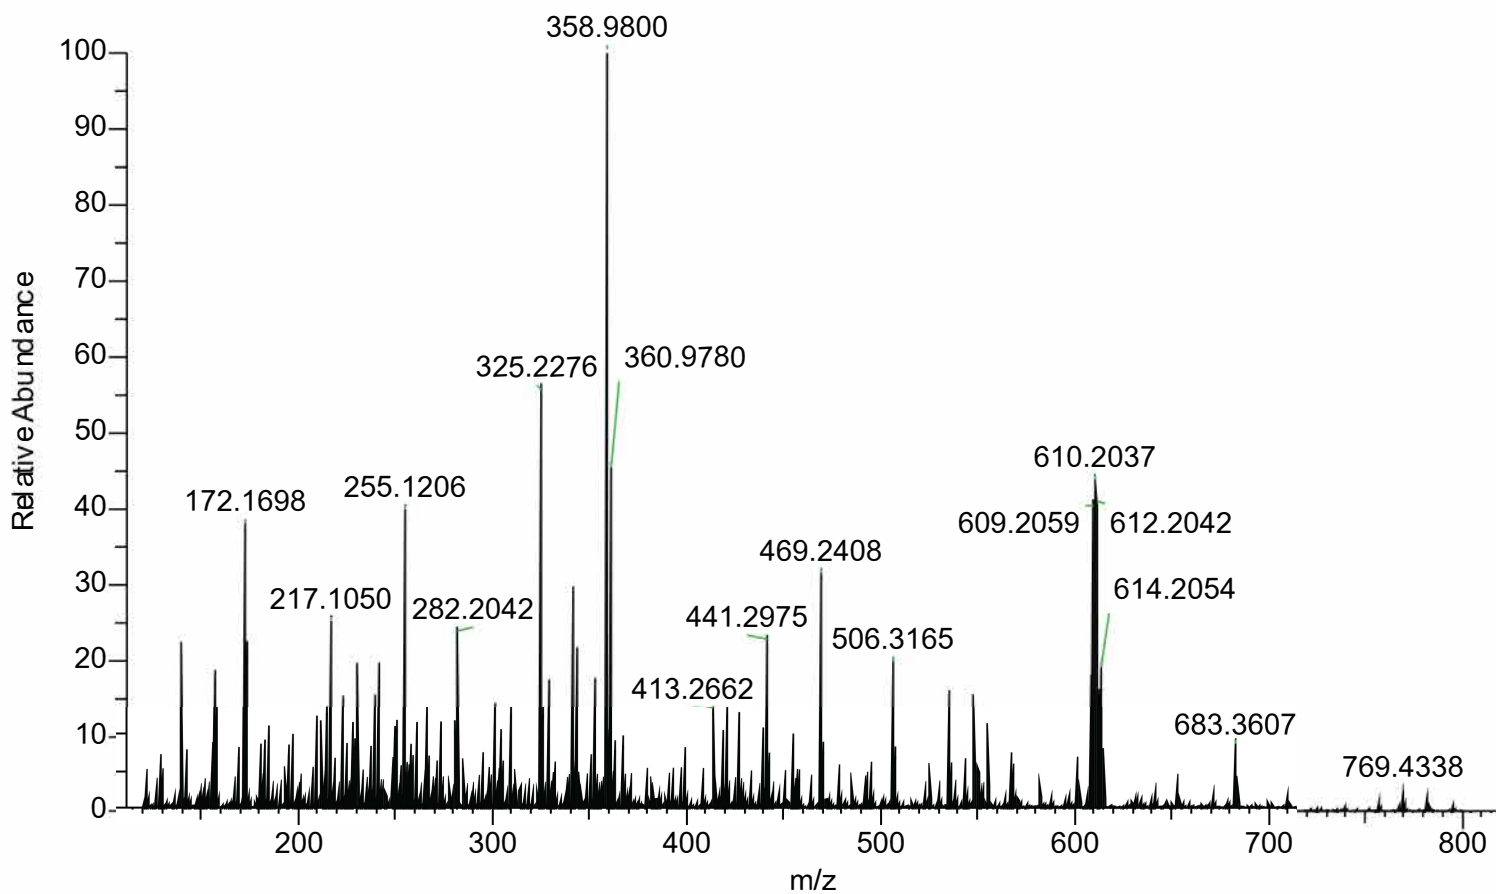

Figure S140. High resolution time-of-flight electrospray ionization mass spectrum of palladium complex **7bPd**.

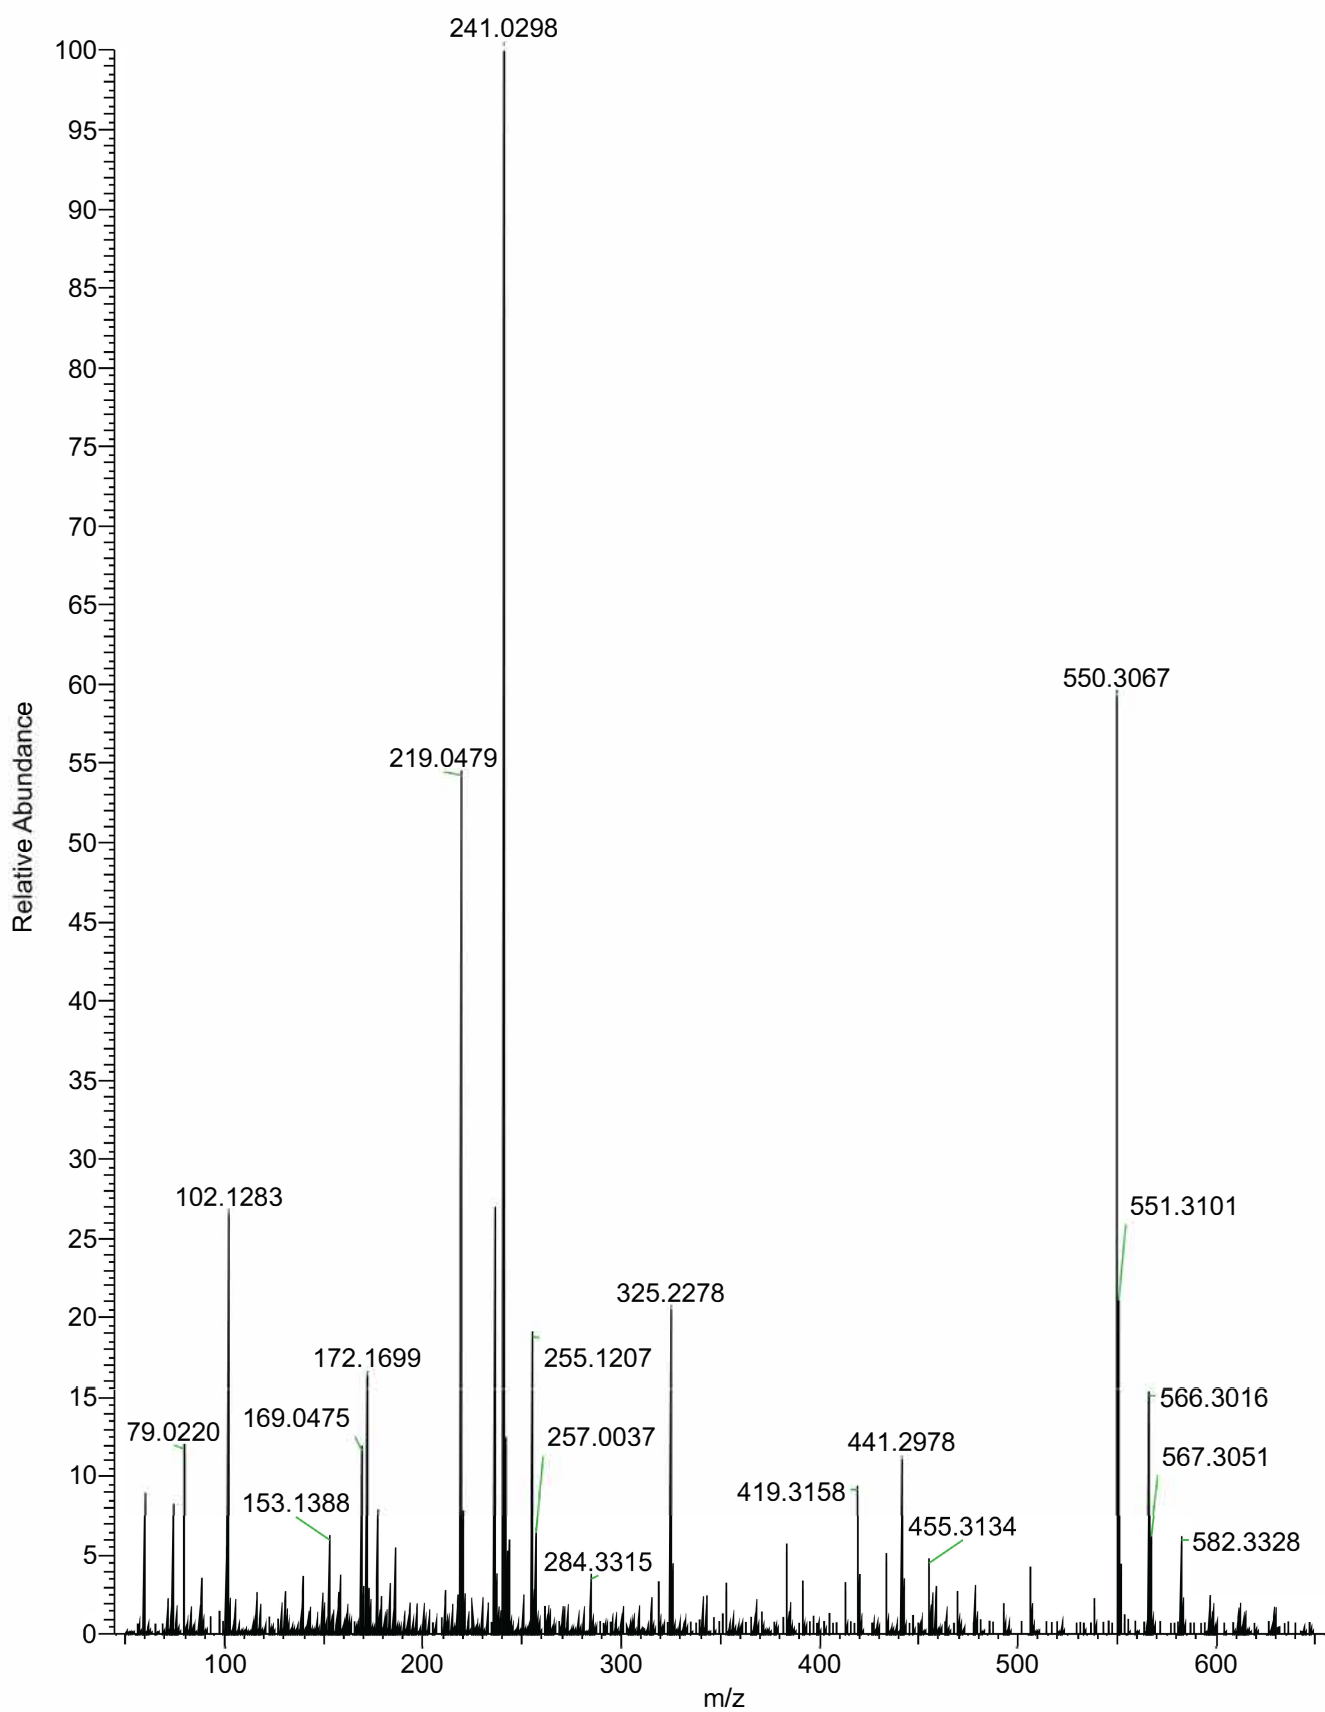

Figure S141. High resolution time-of-flight electrospray ionization mass spectrum of benziporphyrin **7c**.

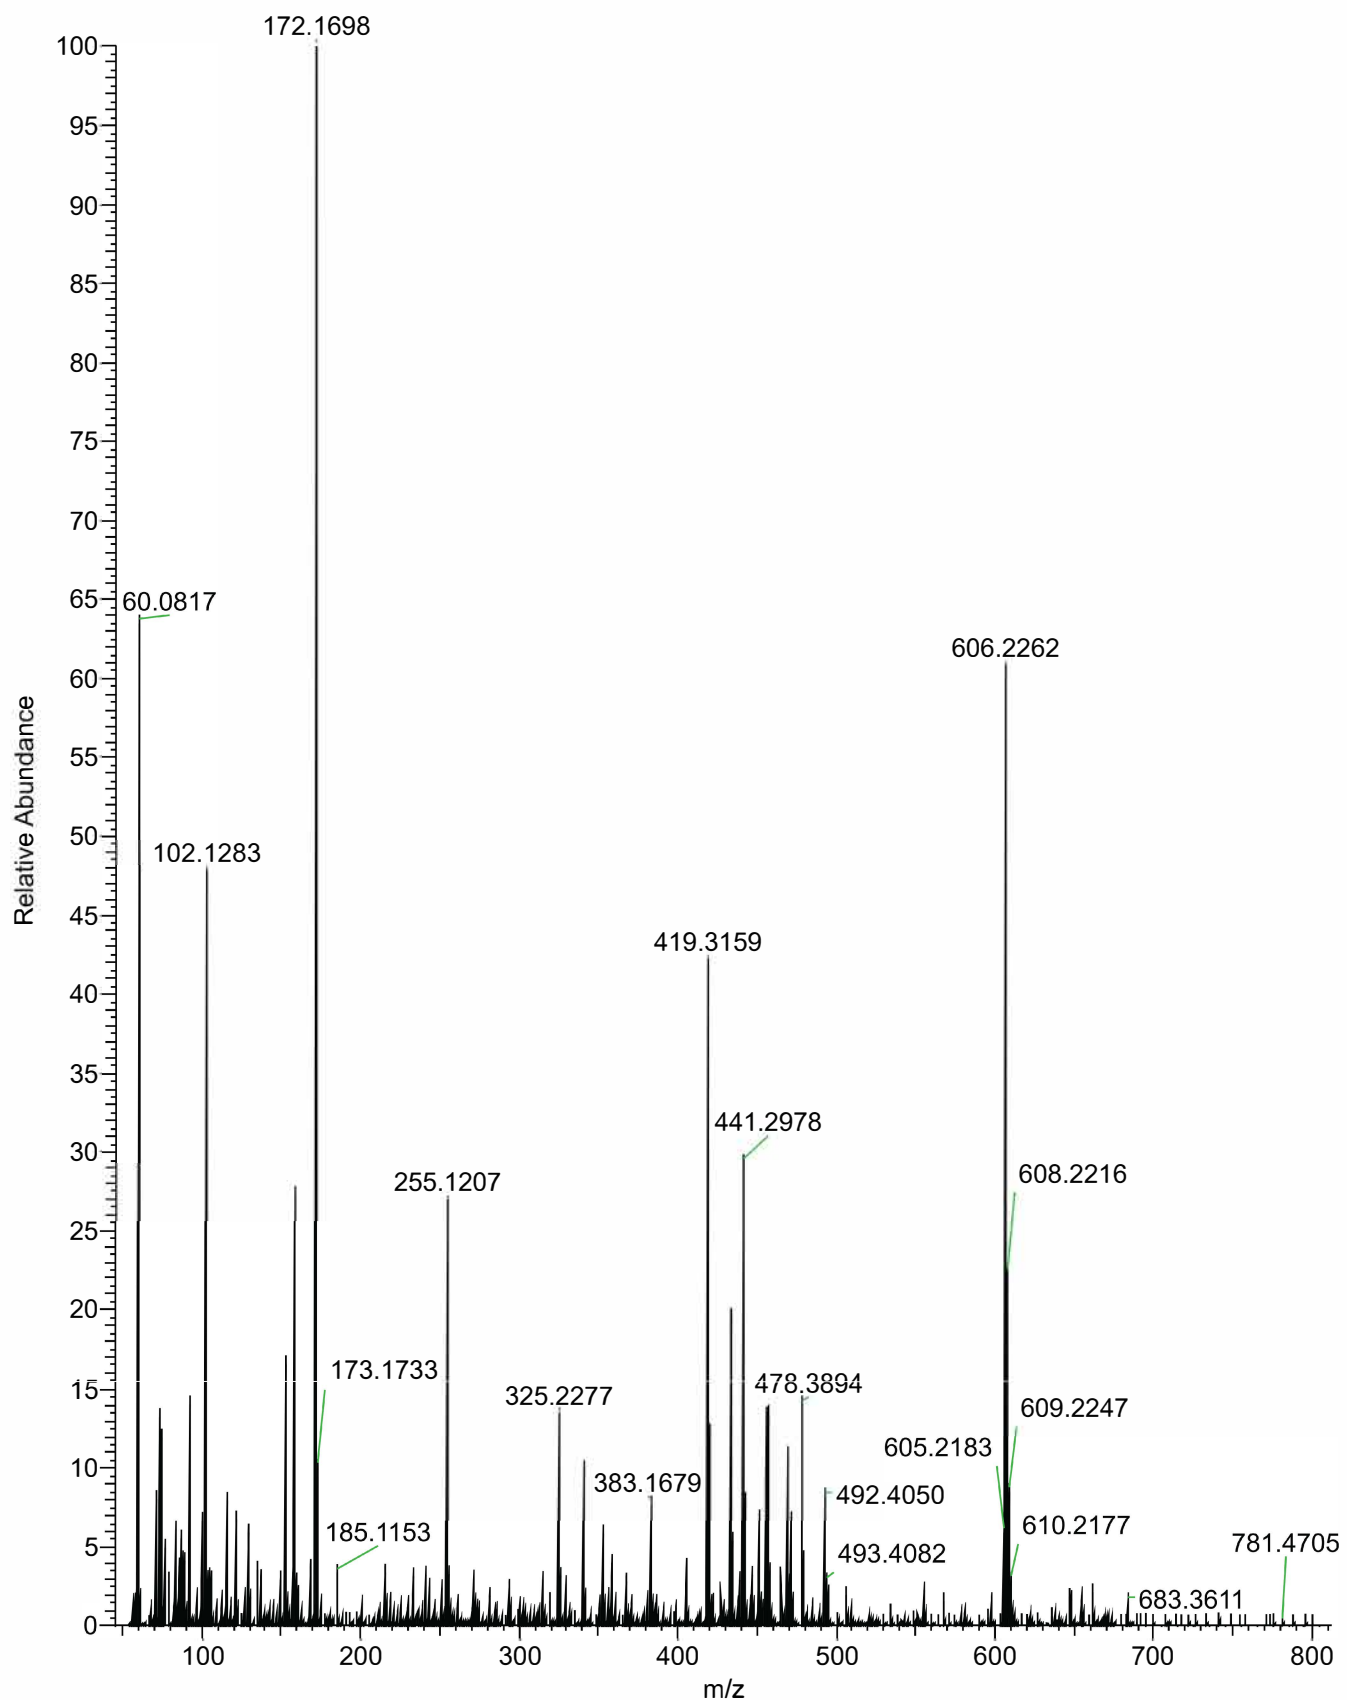

Figure S142. High resolution time-of-flight electrospray ionization mass spectrum of nickel complex **7cNi**.

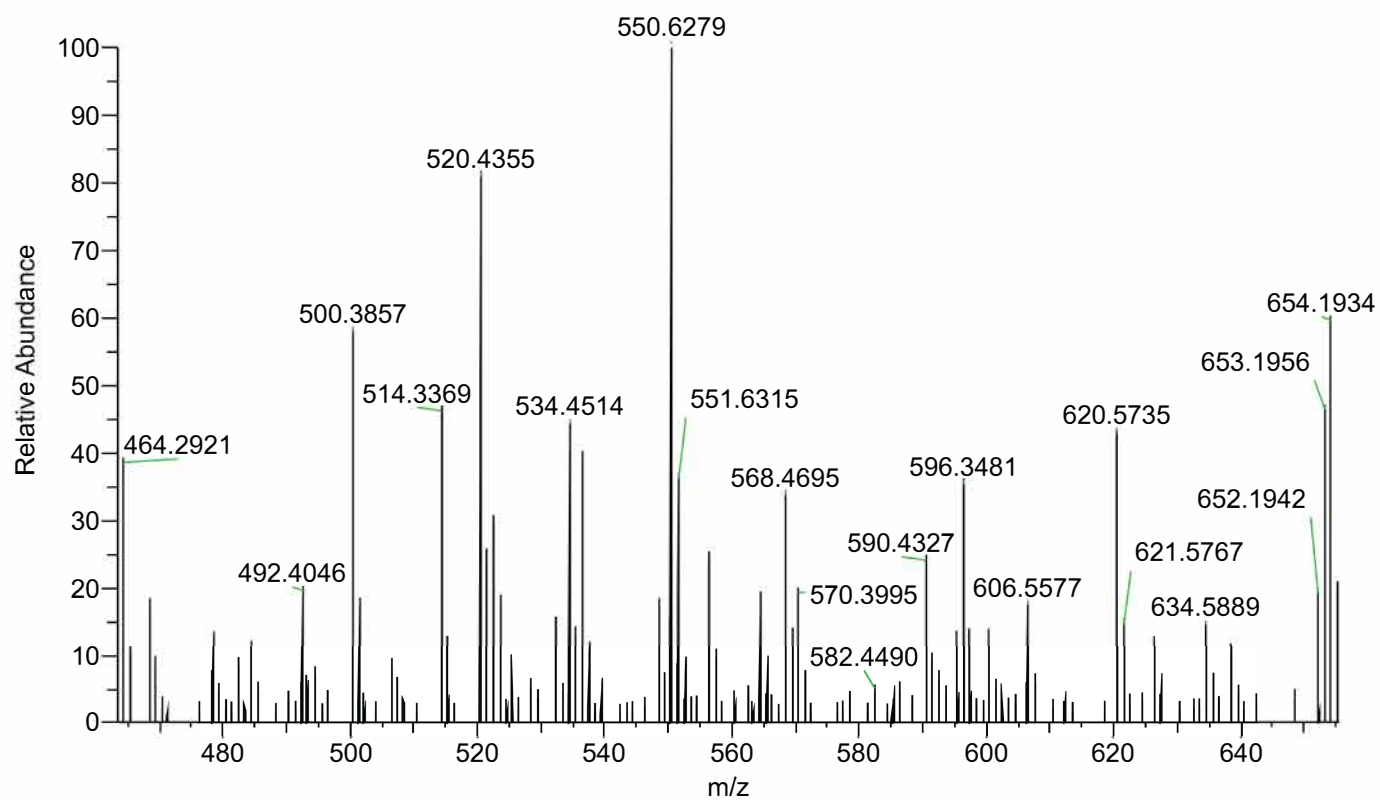

Figure S143. High resolution time-of-flight electrospray ionization mass spectrum of palladium complex **7cPd**.

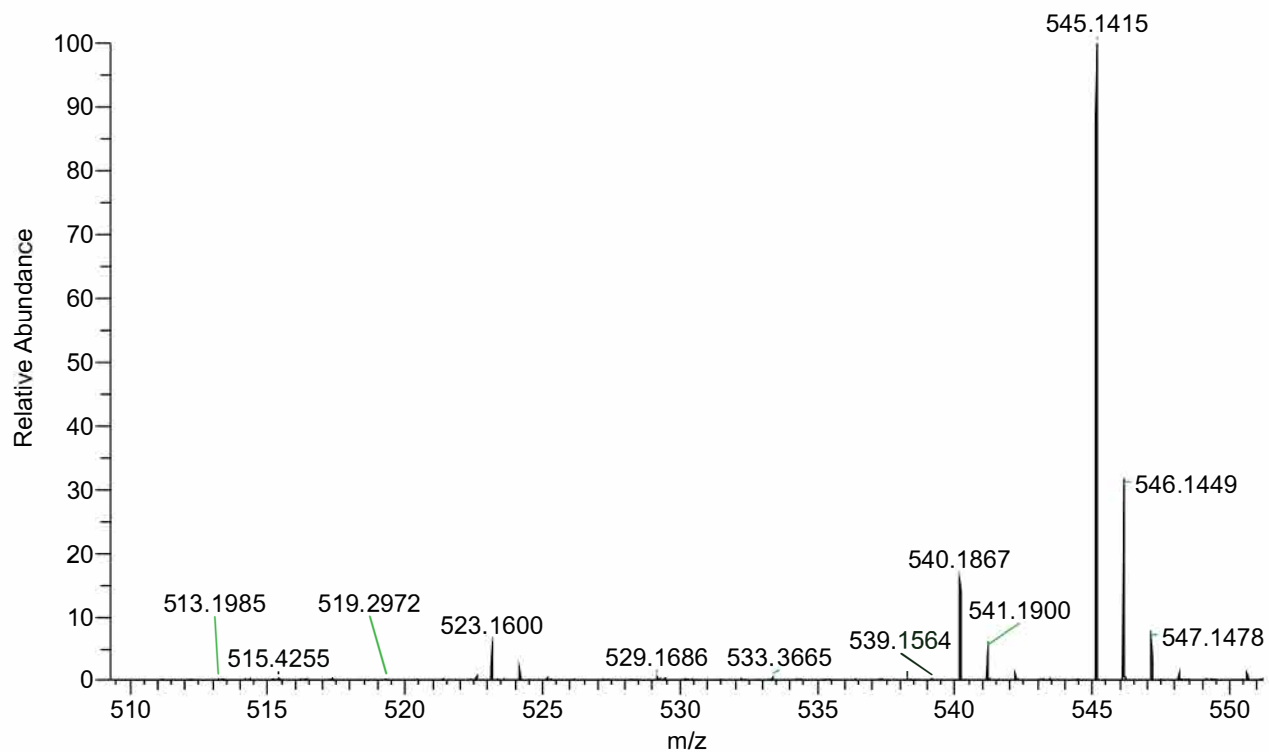

Figure S144. High resolution time-of-flight electrospray ionization mass spectrum of **16a**.

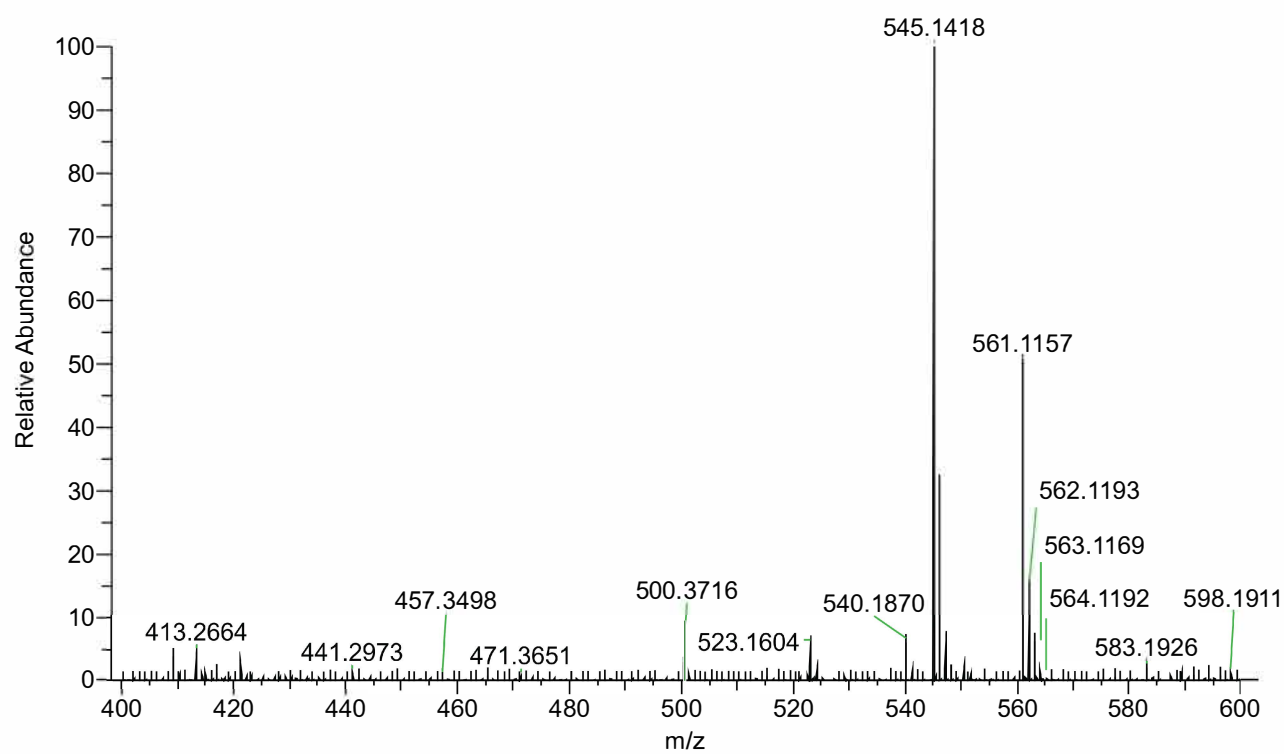

Figure S145. High resolution time-of-flight electrospray ionization mass spectrum of **16b**.

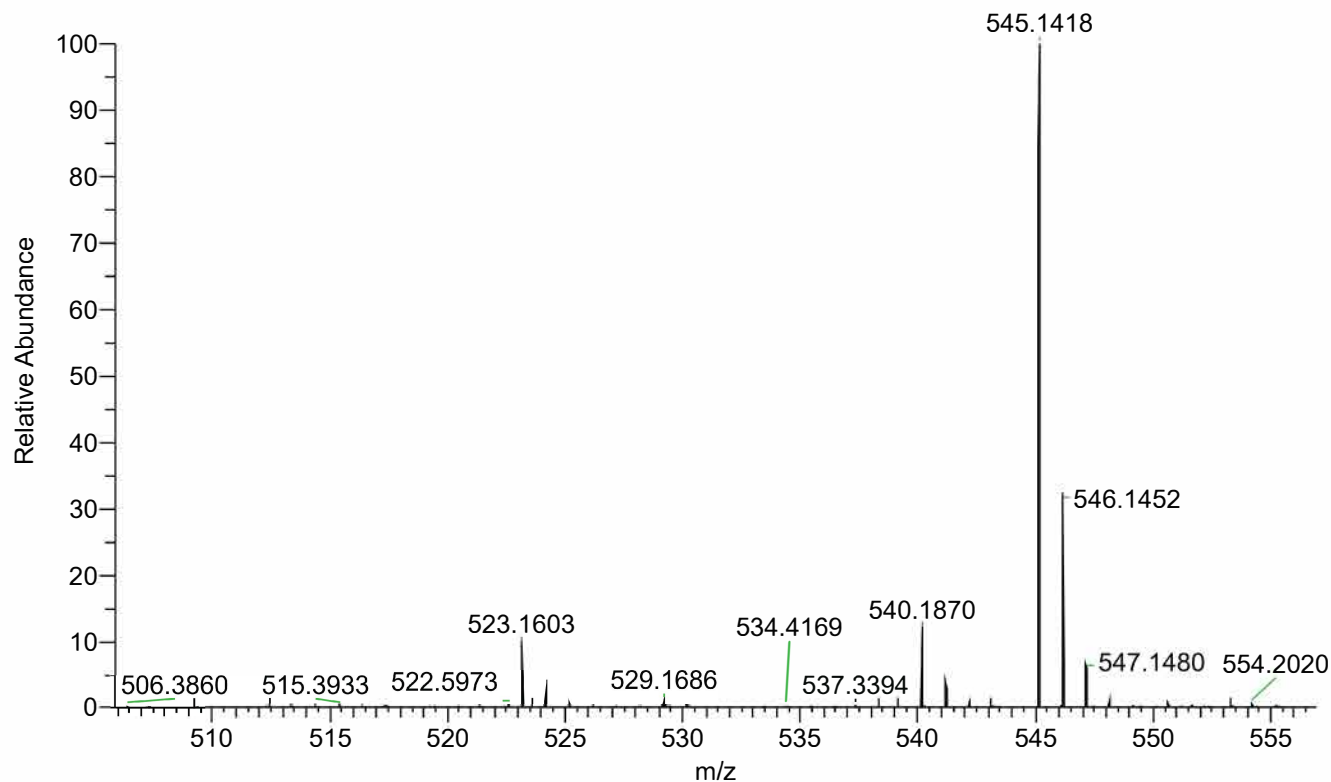

Figure S146. High resolution time-of-flight electrospray ionization mass spectrum of **16c**.

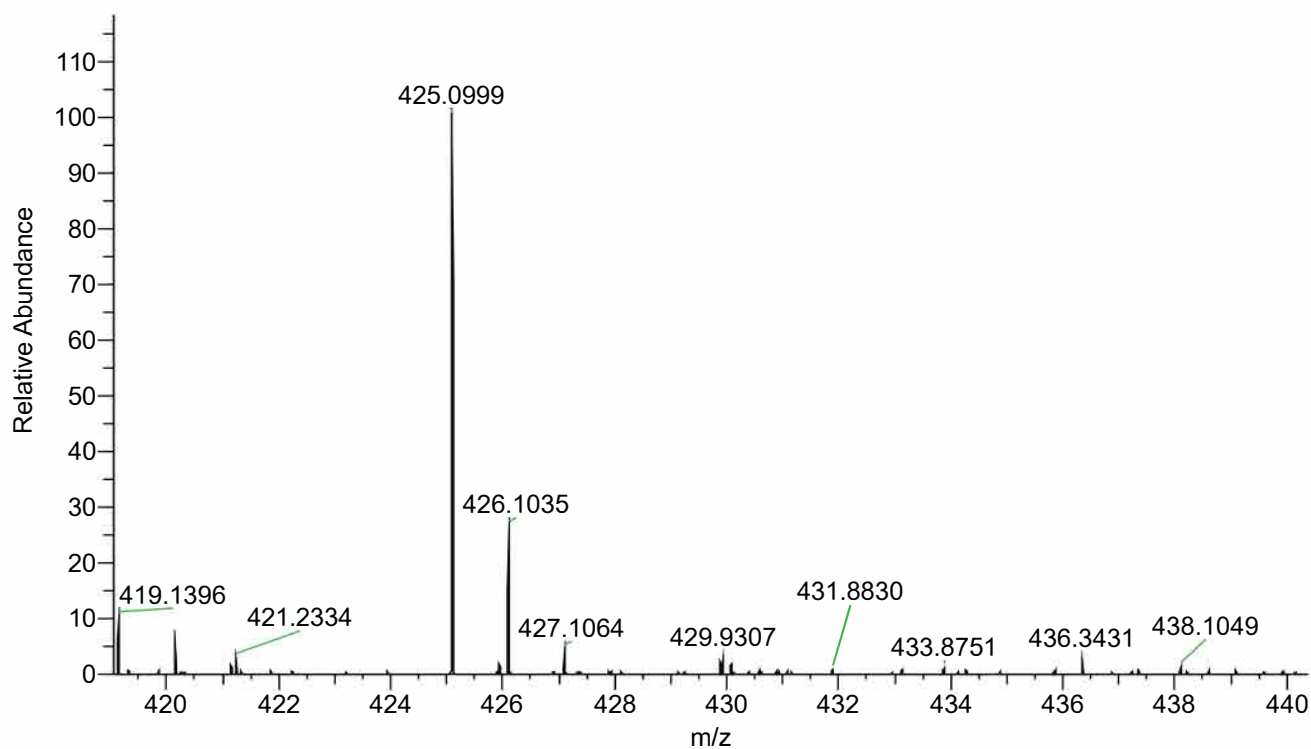

Figure S147. High resolution time-of-flight electrospray ionization mass spectrum of **18a**.

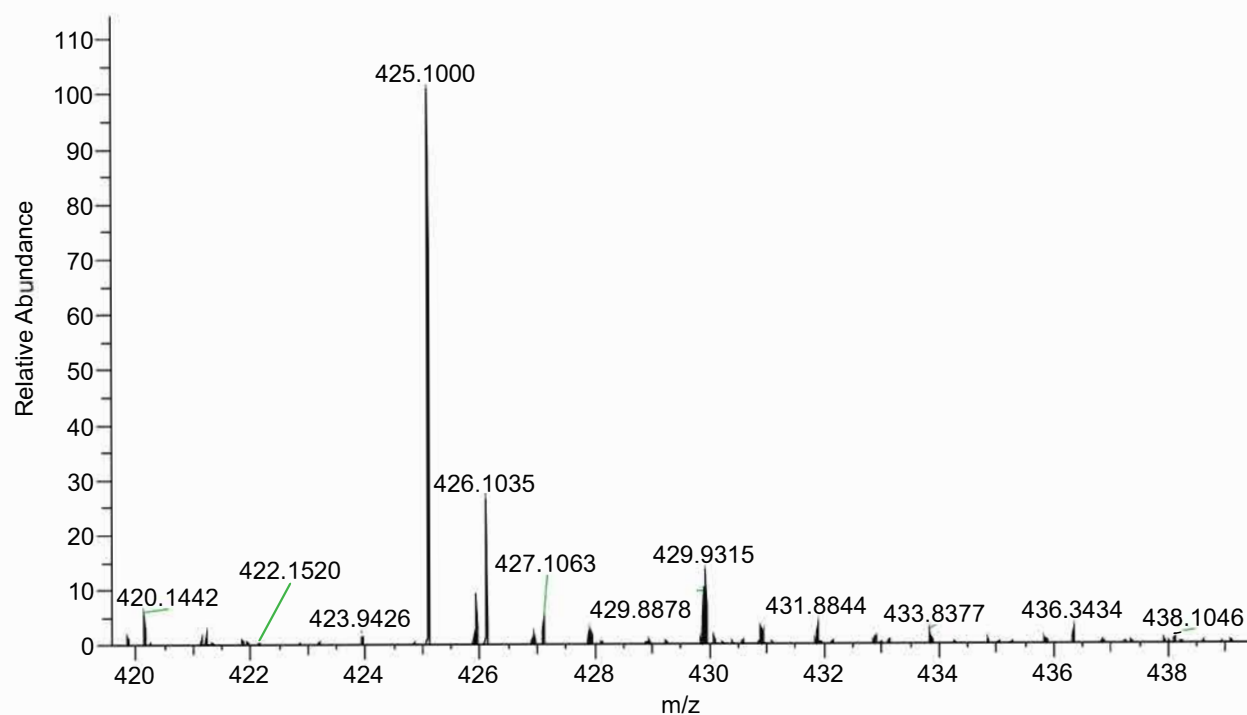

Figure S148. High resolution time-of-flight electrospray ionization mass spectrum of **18b**.

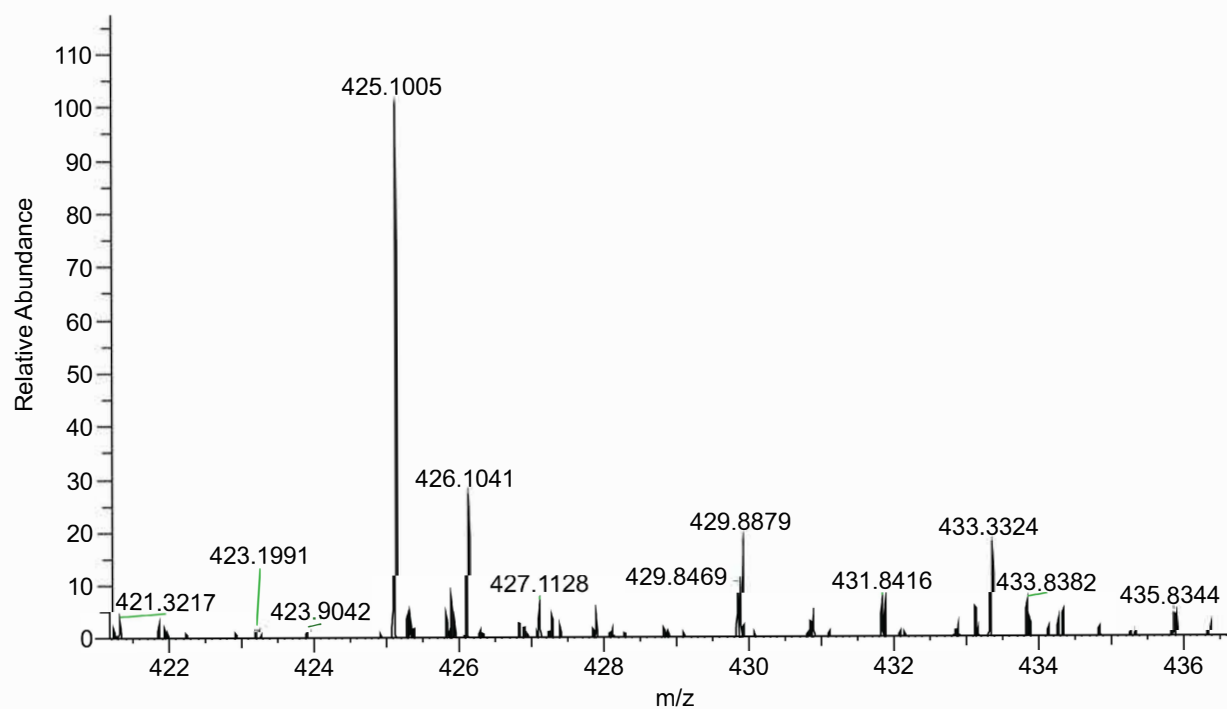

Figure S149. High resolution time-of-flight electrospray ionization mass spectrum of **18c**.
